# Supplementary material
Source: publisher figshare collection journal article supplement (https://gsapubs.figshare.com/articles/dataset/_/23152709)
Supplement: Supplementary file 1 [file 1]

## Sheet: S1 geochronology summary
Supplementary Table 1
Summary of new geochronology in the Eastern SNB
Mafic Body	Sample #	Analytical method	rock type	latitude	longitude	Age (Ma)	2σ	n (grains used in age calculation)	n (all concordant grains)	MSWD
Keough	SNB-18-53	LA-ICPMS	biotite diorite	37.2549	-118.396	88.79	1.28	18	22	0.46
Cargyle Meadows	SNB-19-14	LA-ICPMS	light amph-gabbro	37.5719	-119.156	91.54	1.43	11	16	0.65
Tamarack Lakes	SNB-18-13	LA-ICPMS	equigranular amph-bt gabbro	37.413	-118.712	94.55	1.11	33	37	0.55
Green Lake	SNB-19-43	LA-ICPMS	amph-bt diorite	37.1711	-118.529	97.13	3.33	21	27	7.8
Casa Diablo	SNB-19-08	LA-ICPMS	medium grained amph-gabbro	37.5501	-118.707	100.21	1.06	24	26	7.08
Mount Tom	SNB-19-16	LA-ICPMS	plag rich gabbroic-diorite	37.347	-118.637	145.14	1.68	20	24	0.62
Mount Alice	SNB-18-CB4	LA-ICPMS	amph-plag segregation	37.1251	-118.445	146.13	1.6	30	36	0.7
Bishop Creek	SNB-18-23	LA-ICPMS	bt gabbro	37.2417	-118.556	146.48	1.4	40	46	0.72
Tungsten Hills	SNB-19-34	LA-ICPMS	light, coarse, plag rich diorite	37.3539	-118.526	148.28	1.78	27	31	0.78
McMurry Meadows	SNB-19-64	LA-ICPMS	light, porphyritic amph-diorite	37.0648	-118.374	151.2	1.7	33	35	2.5
Black Canyon	SNB-19-23	LA-ICPMS	weakly foliated bt-diorite	36.8707	-118.304	157.17	2.38	28	33	2.1
Shannon Canyon	SNB-19-52	LA-ICPMS	bt-rich diorite	37.2034	-118.4	168.18	1.87	34	36	0.77
Pine Creek	SNB-19-60	LA-ICPMS	light diorite	37.3535	-118.73	194.03	2.64	17	25	0.96
leucogranite of Rawson Creek (at Keough)	SNB-18-52	LA-ICPMS	granite	37.2573	-118.386	97.24	1.1	26	30	1.1
Spook pluton (at Black Canyon)	SNB-19-24	LA-ICPMS	fine grained granite	36.8716	-118.301	104.86	2.1	22	29	2.5
Kca* (at Shannon Canyon)	SNB-19-56	LA-ICPMS	fine grained granite	37.215	-118.389	145.3	1.2	35	39	1.5
Mule Lake pluton (at Armstrong Canyon)	SNB-17-4	LA-ICPMS	coarse bt-amph granodiorite	36.9508	-118.347	158.4	1.5	27	34	1.1
Tungsten Hills Quartz Monzonite (at Bishop Creek)	SNB-18-45	LA-ICPMS	granodiorite	37.2354	-118.561	167.84	1.55	25	29	0.87
Tungsten Hills Quartz Monzonite (at Shannon Canyon)	SNB-19-54	LA-ICPMS	granite/quartz monzonite	37.2049	-118.397	170.84	1.9	20	22	1.4
Tungsten Hills Quartz Monzonite (at Mt Tom)	SNB-19-21	LA-ICPMS	quartz monzonite	37.3492	-118.63	201	2.6	18	21	3.3
*Kca: "rocks similar to the Cathederal Peak alaskaite" (as mapped by Bateman, P., Carmar, M., Clark, L., Jackson, E., and Parker, R., 1965, Geologic map of the Big Pine 15-minute quadrangle, California: US Geol Surv Prof Pap, v. 470.)

## Sheet: S2 zircon analyses
Supplementary Table 2
All LA-ICPMS analyses of zircon
Spook Pluton, granite				Isotope Ratios						Apparent Ages (Ma)						Best Age
Analysis	U (ppm)	206Pb/ 204Pb	U/Th	206Pb/ 207Pb	± (%)	207Pb/ 235U	± (%)	206Pb/ 238U	± (%)	206Pb/ 238U	±	207Pb/ 235U	±	206Pb/ 207Pb	±	Best Age (Ma)	± (Ma)	excluded for discordance (d), outlier (o), or both (o,d)
SNB-19-24 Spot 2	1642.21	2100.43	2.53692	17.1258	1.56187	0.105898	3.11956	0.013159	2.70041	84.2753	2.26097	102.206	3.03316	543.524	34.1386	84.2753	2.26097	o,d
SNB-19-24 Spot 8	6482.16	1.50152e+06	0.57253	20.9386	1.07889	0.092616	2.76462	0.0140709	2.54541	90.0747	2.27682	89.9373	2.37949	86.3173	25.6033	90.0747	2.27682	o
SNB-19-24 Spot 22	1839.86	1946.32	2.63069	18.7728	1.52882	0.105391	3.15456	0.0143556	2.75935	91.8845	2.51743	101.741	3.05394	339.288	34.6142	91.8845	2.51743	o,d
SNB-19-24 Spot 13	738.274	19620.1	1.1266	20.6311	2.14247	0.103528	3.79415	0.0154977	3.13135	99.1385	3.08063	100.028	3.61427	121.268	50.4748	99.1385	3.08063
SNB-19-24 Spot 15	1812.96	7527.64	0.548122	18.1132	1.72548	0.1184	3.3091	0.0155609	2.82362	99.5396	2.78904	113.62	3.55709	419.673	38.5522	99.5396	2.78904
SNB-19-24 Spot 21	2134.81	5776.45	0.776535	17.2262	1.84323	0.124646	3.6365	0.0155796	3.13475	99.6584	3.10002	119.276	4.09242	530.761	40.4008	99.6584	3.10002
SNB-19-24 Spot 19	406.366	2214.52	1.04586	20.3267	3.03802	0.106613	4.16001	0.015724	2.84184	100.575	2.83599	102.862	4.06948	156.175	71.1194	100.575	2.83599
SNB-19-24 Spot 14	3071.5	91180.1	0.644874	20.289	1.52619	0.108529	3.20036	0.0159769	2.81301	102.18	2.85167	104.619	3.18148	160.508	35.7245	102.18	2.85167
SNB-19-24 Spot 12	1060.24	10149.9	0.871596	20.581	2.0139	0.108896	3.29246	0.0162617	2.60471	103.987	2.68683	104.955	3.28303	127.02	47.4045	103.987	2.68683
SNB-19-24 Spot 1	1788.89	23430.8	0.852401	20.6117	1.56727	0.109461	3.23128	0.0163704	2.82575	104.676	2.93399	105.472	3.23708	123.471	36.8916	104.676	2.93399	d
SNB-19-24 Spot 30	1110.11	5052.49	0.839945	20.4612	2.62956	0.110739	4.4896	0.0164407	3.63895	105.122	3.79432	106.642	4.54497	140.741	61.7655	105.122	3.79432
SNB-19-24 Spot 3	1733.32	17418.9	0.765005	20.6655	1.93911	0.109933	3.41543	0.016484	2.81158	105.396	2.9392	105.904	3.43485	117.348	45.714	105.396	2.9392
SNB-19-24 Spot 27	1081.5	39242	0.59092	17.8844	2.46724	0.127359	5.73007	0.016527	5.1717	105.669	5.42034	121.722	6.57301	447.99	54.8278	105.669	5.42034
SNB-19-24 Spot 6	1143.34	7647.09	0.897497	19.5195	2.09413	0.116753	3.2158	0.0165358	2.44049	105.725	2.55916	112.124	3.41374	250.201	48.1873	105.725	2.55916
SNB-19-24 Spot 24	614.558	6770.15	1.05529	18.106	5.16437	0.126457	5.98367	0.0166133	3.02218	106.216	3.18375	120.909	6.82078	420.56	115.367	106.216	3.18375
SNB-19-24 Spot 23	740.067	710.627	0.807863	13.1105	8.36727	0.174705	9.11623	0.0166193	3.61862	106.254	3.81343	163.494	13.7673	1101.4	167.614	106.254	3.81343
SNB-19-24 Spot 25	2442.4	22733.6	0.764849	20.8789	1.39512	0.111259	2.81399	0.016855	2.44381	107.749	2.6113	107.116	2.8607	93.0414	33.0521	107.749	2.6113
SNB-19-24 Spot 28	1733.31	682.974	0.820152	10.372	3.34341	0.223971	5.56244	0.0168555	4.44548	107.752	4.75028	205.209	10.3355	1555.01	62.7723	107.752	4.75028
SNB-19-24 Spot 7	1248.34	33993.7	0.90943	20.0794	1.36265	0.116024	3.84743	0.0169039	3.59804	108.059	3.8556	111.461	4.06142	184.737	31.7344	108.059	3.8556
SNB-19-24 Spot 17	1434.4	46900.7	0.844251	18.9365	1.36722	0.123056	3.85517	0.0169079	3.60459	108.084	3.86351	117.839	4.2892	319.591	31.0774	108.084	3.86351
SNB-19-24 Spot 26	1171.6	13511.8	0.98869	18.4402	2.731	0.126492	4.21702	0.0169245	3.21323	108.189	3.44736	120.94	4.80809	379.592	61.4203	108.189	3.44736
SNB-19-24 Spot 5	1606.69	8340.83	0.599955	21.0444	1.99503	0.112144	3.61529	0.0171237	3.015	109.452	3.27213	107.924	3.7016	74.3561	47.4149	109.452	3.27213
SNB-19-24 Spot 9	1827.85	14635.1	0.631775	19.382	1.64163	0.12177	2.95373	0.0171249	2.45551	109.46	2.66511	116.676	3.25566	266.473	37.6897	109.46	2.66511
SNB-19-24 Spot 18	2306.27	4205.24	0.683299	19.4839	1.86161	0.121534	3.82824	0.0171816	3.34512	109.819	3.64246	116.462	4.21229	254.432	42.8175	109.819	3.64246
SNB-19-24 Spot 2	2579.47	2128.58	0.438237	17.1836	2.39478	0.139854	4.17364	0.0174372	3.41824	111.438	3.77649	132.914	5.19966	536.166	52.4174	111.438	3.77649
SNB-19-24 Spot 16	782.284	9756.26	0.82357	17.6582	2.54786	0.136578	3.78347	0.0174991	2.79697	111.831	3.1009	129.991	4.61642	476.203	56.3447	111.831	3.1009
SNB-19-24 Spot 20	1570.07	4760.41	0.776362	16.5688	4.65127	0.146983	6.08287	0.0176703	3.92007	112.915	4.38782	139.244	7.91509	615.346	100.495	112.915	4.38782	d
SNB-19-24 Spot 10	1270.22	100107	0.648983	20.029	1.35877	0.124262	3.19986	0.0180587	2.89704	115.375	3.31273	118.928	3.59115	190.63	31.5988	115.375	3.31273
SNB-19-24 Spot 4	2065.65	3074.39	0.402063	17.5945	4.94565	0.143155	6.02182	0.0182756	3.43552	116.748	3.97481	135.85	7.65715	484.232	109.285	116.748	3.97481	o,d
SNB-19-24 Spot 11	1851.67	632.434	0.517138	10.2709	14.1597	0.255448	14.4612	0.0190371	2.93752	121.567	3.5376	230.992	29.8856	1573.37	266.484	121.567	3.5376	o,d
Tungsten Hills qmz at Mt. Tom				Isotope Ratios						Apparent Ages (Ma)						Best Age
Analysis	U (ppm)	206Pb/ 204Pb	U/Th	206Pb/ 207Pb	± (%)	207Pb/ 235U	± (%)	206Pb/ 238U	± (%)	206Pb/ 238U	±	207Pb/ 235U	±	206Pb/ 207Pb	±	Best Age (Ma)	± (Ma)	ex?
SNB-19-21 Spot 88	7782.7	49677.8	2.86518	20.214	0.899985	0.178711	3.34925	0.0262114	3.22606	166.793	5.31184	166.951	5.15614	169.162	21.0408	166.793	5.31184	o
SNB-19-21 Spot 73	3233.64	13002.9	4.6176	20.0389	3.31556	0.189301	5.14566	0.0275242	3.93509	175.034	6.79509	176.033	8.31653	189.439	77.1588	175.034	6.79509	o
SNB-19-21 Spot 72	1223.63	22520.5	4.00367	19.6272	2.36187	0.195632	5.57102	0.0278603	5.04557	177.143	8.81618	181.423	9.2559	237.559	54.49	177.143	8.81618	o
SNB-19-21 Spot 71	378.692	5304.26	1.79693	20.6467	2.33687	0.187316	4.48276	0.0280617	3.82547	178.406	6.73128	174.337	7.18112	119.486	55.0713	178.406	6.73128
SNB-19-21 Spot 90	930.87	323256	2.57516	18.4415	2.44607	0.221303	4.0833	0.0296121	3.26957	188.12	6.06185	202.993	7.51298	379.431	55.0087	188.12	6.06185
SNB-19-21 Spot 82	468.129	51446.5	3.38689	16.8769	2.32049	0.244871	3.61412	0.029986	2.77078	190.461	5.20006	222.401	7.21861	575.417	50.4339	190.461	5.20006
SNB-19-21 Spot 85	922.689	7211.88	3.60003	19.5186	1.68203	0.211891	3.16633	0.0300088	2.68262	190.603	5.03831	195.138	5.62134	250.313	38.7186	190.603	5.03831
SNB-19-21 Spot 78	551.277	35848.4	2.28368	19.6028	1.95384	0.212002	4.96894	0.0301541	4.56869	191.512	8.62091	195.231	8.82553	240.414	45.0333	191.512	8.62091
SNB-19-21 Spot 84	460.93	6315.69	1.35255	17.1104	2.47142	0.250856	3.36998	0.0311438	2.29104	197.703	4.46071	227.271	6.86249	545.479	54.0013	197.703	4.46071
SNB-19-21 Spot 81	351.207	12234.3	2.05146	19.3143	2.17282	0.223141	3.55752	0.0312713	2.81688	198.5	5.5063	204.521	6.59001	274.472	49.7996	198.5	5.5063
SNB-19-21 Spot 75	559.764	1926.98	2.01118	17.8377	2.20853	0.242469	3.24119	0.0313822	2.37229	199.193	4.65317	220.44	6.4226	453.814	49.0383	199.193	4.65317
SNB-19-21 Spot 86	1256.05	14789.1	2.48868	19.2864	1.4995	0.225098	2.49981	0.0315	2.00013	199.93	3.93749	206.144	4.6638	277.825	34.3431	199.93	3.93749
SNB-19-21 Spot 89	894.123	7741.85	0.87477	19.0419	2.03661	0.229884	3.55325	0.0317619	2.91167	201.566	5.77814	210.103	6.74383	306.948	46.3925	201.566	5.77814
SNB-19-21 Spot 76	675.311	3694.06	4.09722	19.7207	4.4149	0.227223	5.15048	0.0325135	2.65257	206.26	5.3846	207.904	9.68324	226.576	102.05	206.26	5.3846
SNB-19-21.17	906.213	14860.4	1.86739	18.3669	1.57507	0.244972	2.8258	0.0326468	2.34612	207.093	4.78144	222.484	5.6459	388.532	35.3425	207.093	4.78144
SNB-19-21.2	758.209	32134.4	3.26337	19.0381	1.46637	0.237768	3.09009	0.0328447	2.72	208.328	5.57594	216.591	6.02726	307.37	33.4015	208.328	5.57594
SNB-19-21 Spot 83	4267.15	19772.7	0.504486	19.0721	1.51352	0.238294	3.01484	0.032976	2.6074	209.147	5.36579	217.022	5.89099	303.339	34.499	209.147	5.36579
SNB-19-21 Spot 77	766.754	21521.9	2.3917	19.3522	1.77353	0.235838	2.80866	0.0331155	2.17788	210.018	4.50022	215.006	5.44233	269.979	40.675	210.018	4.50022
SNB-19-21 Spot 79	469.068	4217.15	1.93106	20.346	3.9618	0.224866	5.07243	0.0331963	3.1676	210.522	6.56078	205.952	9.4557	153.942	92.8249	210.522	6.56078
SNB-19-21 Spot 87	1229.02	20672.9	0.918129	19.6752	1.25789	0.235139	3.52644	0.0335684	3.29446	212.843	6.89754	214.432	6.81681	231.896	29.0425	212.843	6.89754
SNB-19-21 Spot 80	689.722	4818.49	2.30628	18.2966	3.91471	0.260689	5.14917	0.0346083	3.345	219.326	7.21305	235.222	10.8118	397.139	87.7767	219.326	7.21305
Mule Lake Pluton, granodiorite				Isotope Ratios						Apparent Ages (Ma)						Best Age
Analysis	U (ppm)	206Pb/ 204Pb	U/Th	206Pb/ 207Pb	± (%)	207Pb/ 235U	± (%)	206Pb/ 238U	± (%)	206Pb/ 238U	±	207Pb/ 235U	±	206Pb/ 207Pb	±	Best Age (Ma)	± (Ma)	ex?
SNB-17-4 Spot 120	641.104	5905.38	2.58484	21.0761	3.07612	0.139633	4.83004	0.0213534	3.72381	136.204	5.01877	132.717	6.0091	70.7769	73.1562	136.204	5.01877	o
SNB-17-4 Spot 121	353.304	50538	1.56912	19.7522	2.67111	0.156481	4.85863	0.0224266	4.0585	142.974	5.73873	147.618	6.67533	222.878	61.8003	142.974	5.73873	o
SNB-17-4 Spot 110	476.91	2701.63	1.63301	21.1378	5.76332	0.154825	6.24432	0.023746	2.40326	151.287	3.59349	146.163	8.50061	63.8146	137.337	151.287	3.59349	o
SNB-17-4 Spot 115	399.71	9768.29	1.9301	19.1448	2.26573	0.171124	4.28262	0.023771	3.63419	151.445	5.43965	160.394	6.35409	294.68	51.7258	151.445	5.43965	o
SNB-17-4.12	849.721	11634	1.67691	18.6909	1.59545	0.175663	3.01339	0.0238231	2.55638	151.773	3.83457	164.322	4.57179	349.174	36.0685	151.773	3.83457
SNB-17-4.10	623.93	4888.88	2.14278	18.498	3.84096	0.178362	4.51167	0.0239394	2.3669	152.505	3.56729	166.65	6.93421	372.546	86.4833	152.505	3.56729
SNB-17-4 Spot 123	284.528	10639.8	1.4941	13.1381	4.61799	0.255456	5.65077	0.0243522	3.25659	155.103	4.9908	230.999	11.6754	1097.19	92.4692	155.103	4.9908	d
SNB-17-4.20	517.923	5372.24	1.78627	19.8101	1.71912	0.169492	2.76258	0.0243626	2.16251	155.169	3.31547	158.978	4.06535	216.125	39.8302	155.169	3.31547
SNB-17-4 Spot 108	620.46	5857.75	1.19142	21.5842	2.38352	0.155585	3.13741	0.0243663	2.04014	155.192	3.12834	146.831	4.28912	13.7712	57.3101	155.192	3.12834
SNB-17-4 Spot 118	338.431	5039.33	1.37725	21.2105	3.31813	0.159113	4.11673	0.0244875	2.43669	155.955	3.75453	149.926	5.73807	55.6226	79.1637	155.955	3.75453
SNB-17-4.8	323.762	37679.8	2.24558	13.775	3.22332	0.248314	4.2544	0.0248188	2.77672	158.039	4.33495	225.205	8.59322	1001.77	65.478	158.039	4.33495	d
SNB-17-4.5	566.183	8609.69	1.49613	20.0501	1.91603	0.170672	3.31723	0.0248293	2.70792	158.105	4.2293	160.002	4.91061	188.141	44.616	158.105	4.2293
SNB-17-4 Spot 125	556.677	4960.17	1.25905	21.2447	2.02961	0.16135	2.93575	0.0248718	2.12116	158.373	3.31841	151.884	4.1415	51.7742	48.4509	158.373	3.31841
SNB-17-4 Spot 126	435.716	3577.83	1.28477	20.3564	4.29059	0.168436	4.79944	0.0248784	2.15068	158.414	3.36546	158.06	7.02516	152.744	100.544	158.414	3.36546
SNB-17-4.9	630.814	28005.3	1.46029	19.781	1.55521	0.173527	2.4181	0.0249059	1.85162	158.587	2.90061	162.476	3.63061	219.542	35.9895	158.587	2.90061
SNB-17-4 Spot 117	508.199	1613.69	1.23183	21.3171	4.74284	0.161153	5.67771	0.0249261	3.12119	158.714	4.89328	151.712	8.00132	43.6227	113.414	158.714	4.89328
SNB-17-4 Spot 107	703.494	17361.2	1.40934	20.2481	1.71938	0.169707	3.43818	0.0249328	2.97738	158.756	4.66905	159.164	5.06506	165.223	40.1976	158.756	4.66905
SNB-17-4 Spot 122	490.671	5649.39	1.24044	21.0849	2.28647	0.163166	3.78612	0.0249626	3.01774	158.943	4.73786	153.471	5.39283	69.7508	54.396	158.943	4.73786
SNB-17-4.1	733.941	47517.7	2.2188	20.1236	1.88638	0.171115	2.77949	0.0249851	2.04135	159.085	3.20775	160.386	4.12368	179.618	43.9709	159.085	3.20775
SNB-17-4 Spot 116	440.839	1846.64	1.45605	14.7752	7.84925	0.233234	8.26183	0.0250042	2.57821	159.205	4.05437	212.865	15.8668	857.881	163.193	159.205	4.05437	d
SNB-17-4 Spot 106	497.1	5628.31	1.49376	20.8115	3.32962	0.165616	4.33713	0.0250088	2.77927	159.234	4.37134	155.607	6.25726	100.736	78.7522	159.234	4.37134
SNB-17-4.4	590.697	30347.4	1.94916	19.5406	1.70727	0.176475	2.59663	0.0250212	1.95645	159.312	3.07867	165.023	3.95496	247.736	39.301	159.312	3.07867
SNB-17-4 Spot 127	324.66	1042.49	1.32213	15.7027	14.3736	0.221187	14.642	0.0252012	2.79059	160.444	4.42208	202.897	26.9345	730.228	306.059	160.444	4.42208
SNB-17-4 Spot 114	647.673	7414.24	1.52324	20.9825	2.08341	0.165967	3.55289	0.0252679	2.87792	160.863	4.57223	155.913	5.13514	81.3032	49.4469	160.863	4.57223
SNB-17-4.6	599.279	12590.3	2.18064	17.4715	1.77259	0.199447	2.78992	0.0252839	2.15443	160.964	3.42493	184.658	4.71054	499.705	39.0391	160.964	3.42493
SNB-17-4.20	397.74	11715.1	2.96819	17.7331	2.87262	0.197298	3.46973	0.025386	1.94605	161.606	3.10584	182.838	5.80566	466.861	63.6526	161.606	3.10584
SNB-17-4.19	408.032	7272.92	4.40032	19.9987	2.56881	0.175107	3.47057	0.0254093	2.33368	161.752	3.72782	163.841	5.25121	194.152	59.7379	161.752	3.72782
SNB-17-4.21	614.255	7149.16	1.97497	16.6667	3.98813	0.211125	4.48297	0.0255315	2.0474	162.521	3.28586	194.496	7.93515	602.605	86.3503	162.521	3.28586
SNB-17-4 Spot 109	389.769	13293.6	1.55599	18.8714	3.30118	0.187013	4.2582	0.0256073	2.6897	162.997	4.32917	174.077	6.81206	327.39	74.9249	162.997	4.32917
SNB-17-4.13	588.88	8291.11	1.54576	21.0797	2.42839	0.168147	3.18281	0.0257182	2.05748	163.694	3.32556	157.809	4.65195	70.3649	57.7698	163.694	3.32556
SNB-17-4.17	521.47	7628.75	1.82047	19.9397	1.87846	0.178124	3.05625	0.0257709	2.41083	164.025	3.90448	166.445	4.69196	200.977	43.6148	164.025	3.90448
SNB-17-4 Spot 111	311.07	16970.7	1.64291	19.6038	3.42789	0.182285	4.56169	0.0259286	3.00975	165.016	4.90355	170.025	7.14154	240.3	79.048	165.016	4.90355
SNB-17-4 Spot 128	273.51	1854.03	2.10687	19.0146	4.8964	0.188651	5.98118	0.0260276	3.43507	165.638	5.61733	175.478	9.63907	310.232	111.505	165.638	5.61733
SNB-17-4 Spot 112	296.777	2964.24	1.36461	20.6268	2.62037	0.174528	4.15356	0.0261207	3.22269	166.223	5.28839	163.341	6.26698	121.755	61.7351	166.223	5.28839
Tungsten Hills qmz at Shannon Canyon				Isotope Ratios						Apparent Ages (Ma)						Best Age
Analysis	U (ppm)	206Pb/ 204Pb	U/Th	206Pb/ 207Pb	± (%)	207Pb/ 235U	± (%)	206Pb/ 238U	± (%)	206Pb/ 238U	±	207Pb/ 235U	±	206Pb/ 207Pb	±	Best Age (Ma)	± (Ma)	ex?
SNB-19-54 spot 3	511.039	8710.16	2.13591	19.5626	2.63804	0.179711	4.85147	0.0255087	4.07154	162.378	6.5287	167.812	7.50429	245.144	60.7755	162.378	6.5287
SNB-19-54 spot 8	304.649	6051.54	2.13698	20.995	2.14892	0.169696	3.82688	0.0258509	3.16657	164.528	5.14396	159.155	5.63738	79.8888	51.0247	164.528	5.14396
SNB-19-54 spot 1	310.642	5464.44	1.48826	20.7592	3.20281	0.171787	3.90904	0.0258754	2.2411	164.682	3.64396	160.968	5.81896	106.692	75.6618	164.682	3.64396
SNB-19-54 spot 4	363.277	20084.9	1.46477	20.1624	2.82471	0.178806	4.08586	0.0261586	2.95216	166.461	4.8513	167.033	6.29303	175.121	65.9123	166.461	4.8513
SNB-19-54.33	770.676	22594.4	1.78044	19.4765	1.29815	0.185961	5.931	0.0262798	5.78719	167.222	9.55304	173.177	9.44327	255.309	29.834	167.222	9.55304
SNB-19-54.27	841.467	18996.7	1.91119	19.4747	1.1765	0.186631	2.11844	0.026372	1.76172	167.802	2.91805	173.751	3.38312	255.495	27.0639	167.802	2.91805
SNB-19-54.20	616.306	14256.8	1.65403	18.9185	1.59671	0.192176	2.40058	0.0263799	1.79257	167.851	2.97001	178.484	3.92922	321.755	36.2755	167.851	2.97001
SNB-19-54 spot 6	649.501	17743.7	1.60499	18.5995	2.19812	0.196635	3.34734	0.026537	2.52447	168.838	4.20692	182.275	5.58514	360.207	49.5852	168.838	4.20692
SNB-19-54 spot 2	324.653	21151.5	2.31145	18.1938	3.09504	0.201537	5.32169	0.0266053	4.3291	169.267	7.23236	186.426	9.06379	409.752	69.2318	169.267	7.23236
SNB-19-54 spot 9	307.368	5052.6	2.22966	20.149	3.60315	0.183187	4.48263	0.0267815	2.6667	170.373	4.48384	170.799	7.04711	176.679	84.0463	170.373	4.48384
SNB-19-54.30	1138.68	1232.46	2.47426	14.1245	9.16658	0.26212	9.92565	0.0268634	3.80688	170.888	6.42002	236.374	20.9339	950.722	187.958	170.888	6.42002	d
SNB-19-54.26	895.981	102069	1.63904	18.9338	1.38225	0.195559	2.35905	0.026866	1.91167	170.904	3.22419	181.361	3.91809	319.915	31.4267	170.904	3.22419
SNB-19-54.5	1092.81	13059.1	1.66906	20.0094	1.39001	0.185118	3.90462	0.0268763	3.64883	170.968	6.15634	172.455	6.19299	192.915	32.3226	170.968	6.15634
SNB-19-54 spot 7	388.765	4891.04	2.16431	20.7128	2.12193	0.179475	3.3806	0.026973	2.63171	171.575	4.4558	167.608	5.22326	111.977	50.0773	171.575	4.4558
SNB-19-54.17	1061.9	7309.17	1.90026	18.9272	2.68595	0.200403	5.8278	0.0275218	5.17194	175.02	8.93014	185.467	9.87927	320.708	61.0185	175.02	8.93014
SNB-19-54 spot 5	337.691	6024.08	2.04084	20.929	3.05113	0.182574	4.62174	0.0277252	3.47146	176.295	6.0371	170.273	7.24524	87.4101	72.352	176.295	6.0371
SNB-19-54.12	862.853	7130.94	2.00352	18.7239	2.22124	0.204387	3.09944	0.0277675	2.16162	176.561	3.76479	188.832	5.34078	345.18	50.2531	176.561	3.76479
SNB-19-54.2	626.182	17373.6	1.76234	19.5813	1.5755	0.196067	2.22885	0.027857	1.57657	177.122	2.75443	181.793	3.7099	242.972	36.3151	177.122	2.75443
SNB-19-54.4	921.219	12042.4	1.49852	19.8557	1.46263	0.195576	5.94378	0.0281767	5.76101	179.127	10.1775	181.376	9.87292	210.782	33.9231	179.127	10.1775
SNB-19-54.11	732.522	24495.4	1.75254	17.9466	2.36094	0.218776	4.23896	0.0284886	3.52061	181.082	6.28648	200.891	7.72633	440.267	52.5513	181.082	6.28648
SNB-19-54.14	1051.1	198502	1.71164	19.8464	1.12713	0.206569	5.66546	0.0297464	5.55221	188.961	10.3392	190.669	9.84897	211.848	26.1286	188.961	10.3392
SNB-19-54.6	550.003	13593.5	1.45837	19.4754	1.81743	0.216837	3.59957	0.0306414	3.10706	194.561	5.95483	199.274	6.51309	255.429	41.7781	194.561	5.95483	o
Leukogranite of Rawson Creek at Keough				Isotope Ratios						Apparent Ages (Ma)						Best Age
Analysis	U (ppm)	206Pb/ 204Pb	U/Th	206Pb/ 207Pb	± (%)	207Pb/ 235U	± (%)	206Pb/ 238U	± (%)	206Pb/ 238U	±	207Pb/ 235U	±	206Pb/ 207Pb	±	Best Age (Ma)	± (Ma)	ex?
SNB-18-52 Spot 123	192.297	8078.79	0.61521	20.7448	3.66055	0.0949429	5.278	0.0142909	3.80232	91.4729	3.45353	92.0975	4.64701	108.305	86.4963	91.4729	3.45353
SNB-18-52 Spot 113	756.454	14876.3	5.64657	19.699	3.82318	0.100344	6.03721	0.0143425	4.67238	91.8008	4.25889	97.0942	5.5903	229.104	88.331	91.8008	4.25889
SNB-18-52 Spot 106	438.706	5466.54	2.53738	21.5609	3.70974	0.0924964	4.59616	0.0144704	2.71339	92.6135	2.495	89.8262	3.95123	16.3896	89.1457	92.6135	2.495
SNB-18-52 Spot 133	245.073	3967.01	4.32704	21.4299	5.44606	0.0943549	7.95545	0.0146714	5.7991	93.8908	5.40537	91.552	6.96478	31.0121	130.563	93.8908	5.40537
SNB-18-52.6	481.668	7748.29	1.52353	19.4316	3.02482	0.104338	3.88458	0.0147109	2.4373	94.1418	2.27784	100.773	3.72664	260.601	69.4893	94.1418	2.27784
SNB-18-52 Spot 136	727.719	8957.4	2.50595	20.8093	2.56477	0.0974614	3.60271	0.0147156	2.53012	94.1714	2.36533	94.4303	3.24866	100.976	60.6551	94.1714	2.36533
SNB-18-52 Spot 138	219.392	3556.51	2.11245	21.6605	4.03842	0.093852	6.01428	0.0147503	4.45676	94.3921	4.17618	91.0854	5.23965	5.30414	97.2682	94.3921	4.17618
SNB-18-52 Spot 128	843.191	40538.2	2.82248	20.8569	2.37888	0.0982161	3.42145	0.0148635	2.45912	95.111	2.32172	95.1283	3.10697	95.5854	56.3259	95.111	2.32172
SNB-18-52 Spot 112	236.91	6126.01	2.21596	20.4429	3.9054	0.100832	6.17467	0.0149564	4.78272	95.7015	4.54333	97.544	5.74283	142.833	91.6927	95.7015	4.54333
SNB-18-52 Spot 132	207.317	14722.2	1.43388	17.2603	3.63236	0.119713	5.12321	0.0149925	3.61293	95.9308	3.44025	114.811	5.56173	526.428	79.6519	95.9308	3.44025
SNB-18-52 Spot 122	510.965	19081.6	3.28972	21.2199	3.57961	0.0978249	5.21236	0.0150619	3.78881	96.3714	3.62417	94.7666	4.71611	54.5574	85.4218	96.3714	3.62417
SNB-18-52 Spot 116	138.264	6524.95	1.3516	22.0275	4.15612	0.0945583	6.67923	0.015113	5.22866	96.6961	5.01818	91.7407	5.85898	NA	NA	96.6961	5.01818
SNB-18-52 Spot 139	396.295	33142.2	2.41287	21.5461	2.97691	0.0969116	5.65435	0.0151507	4.80725	96.935	4.62504	93.9215	5.07248	18.0162	71.5089	96.935	4.62504
SNB-18-52 Spot 119	424.965	7382.76	0.835631	21.5138	2.81614	0.0970925	3.99306	0.0151562	2.83088	96.9702	2.72456	94.0889	3.58822	21.6245	67.6128	96.9702	2.72456
SNB-18-52.7	387.709	5400.55	1.18821	19.0261	3.59332	0.110184	4.58156	0.015211	2.84232	97.3183	2.74532	106.134	4.61713	308.805	81.823	97.3183	2.74532
SNB-18-52 Spot 110	1141.26	88718	2.6118	20.9659	2.20325	0.100014	4.03784	0.0152147	3.38377	97.3416	3.26907	96.7897	3.72774	83.1915	52.2889	97.3416	3.26907
SNB-18-52 Spot 140	552.824	33513	3.5773	20.3545	3.79744	0.103092	5.74331	0.0152255	4.30872	97.4104	4.16559	99.6265	5.45016	152.989	88.9956	97.4104	4.16559
SNB-18-52 Spot 120	327.843	5785.91	2.1478	20.7415	3.9603	0.101509	5.20903	0.0152768	3.38378	97.7359	3.28223	98.1682	4.87423	108.682	93.5612	97.7359	3.28223
SNB-18-52 Spot 129	1219.36	28397.3	2.68973	20.8672	1.74403	0.101339	3.04843	0.0153437	2.50026	98.1607	2.43568	98.012	2.84816	94.4074	41.3166	98.1607	2.43568
SNB-18-52 Spot 114	1137	8599.53	1.82401	18.3565	3.16583	0.115843	3.97988	0.0154293	2.41183	98.7039	2.36244	111.296	4.19535	389.811	71.0544	98.7039	2.36244
SNB-18-52 Spot 131	1574.65	1.66884e+06	3.39303	20.3065	1.57209	0.105591	2.33546	0.0155578	1.72711	99.52	1.70562	101.924	2.26482	158.481	36.8006	99.52	1.70562
SNB-18-52.11	403.15	3609.62	1.70723	20.8571	2.28147	0.103341	3.23729	0.0156391	2.29672	100.036	2.27981	99.8552	3.07875	95.5229	54.0252	100.036	2.27981
SNB-18-52 Spot 134	246.469	4634.95	1.54602	18.3014	5.55013	0.118447	6.27711	0.0157288	2.93225	100.605	2.92709	113.663	6.74999	396.549	124.516	100.605	2.92709
SNB-18-52 Spot 126	1718.79	67260.7	3.40887	18.1419	1.98648	0.119976	3.03145	0.0157929	2.28988	101.012	2.29503	115.05	3.29736	416.145	44.3874	101.012	2.29503
SNB-18-52 Spot 121	1510.38	10802.2	4.19218	20.1964	2.04947	0.108572	2.76548	0.0159103	1.85677	101.757	1.87456	104.658	2.75015	171.195	47.8718	101.757	1.87456
SNB-18-52 Spot 127	152.091	4164.08	0.769982	21.8455	4.94644	0.101727	6.55644	0.0161246	4.30344	103.116	4.40225	98.3696	6.14705	NA	NA	103.116	4.40225
SNB-18-52 Spot 135	170.719	3162.76	1.12089	14.391	6.32398	0.155258	7.70851	0.0162119	4.40777	103.67	4.53301	146.544	10.5194	912.345	130.317	103.67	4.53301	d
SNB-18-52 Spot 115	2036.45	7808.92	7.51562	14.936	2.48884	0.153287	4.3535	0.0166122	3.57193	106.209	3.76264	144.81	5.87545	835.364	51.8763	106.209	3.76264	d
SNB-18-52.2	5632.58	161123	1.87529	20.7209	0.864872	0.137582	3.12199	0.020685	2.9998	131.984	3.919	130.888	3.8339	111.011	20.4356	131.984	3.919	o
SNB-18-52.10	4615.34	138766	1.41421	20.265	0.972504	0.153749	3.43285	0.0226072	3.29222	144.112	4.69185	145.217	4.64503	163.274	22.7148	144.112	4.69185	o
Tungsten Hills qmz at Bishop Creek				Isotope Ratios						Apparent Ages (Ma)						Best Age
Analysis	U (ppm)	206Pb/ 204Pb	U/Th	206Pb/ 207Pb	± (%)	207Pb/ 235U	± (%)	206Pb/ 238U	± (%)	206Pb/ 238U	±	207Pb/ 235U	±	206Pb/ 207Pb	±	Best Age (Ma)	± (Ma)	ex?
SNB-18-45.1	337.155	15404.9	1.5939	19.7899	2.20449	0.181088	3.36814	0.0260029	2.54649	165.483	4.16038	168.997	5.24363	218.486	51.0272	165.483	4.16038
SNB-18-45.10	507.375	16738.1	1.74673	19.5888	1.47598	0.19132	2.43979	0.027193	1.94269	172.956	3.31533	177.755	3.97848	242.045	34.0161	172.956	3.31533
SNB-18-45.11	336.392	20959.3	2.20867	19.6544	2.17855	0.186007	3.28119	0.0265263	2.4536	168.771	4.08723	173.217	5.22527	234.382	50.2883	168.771	4.08723
SNB-18-45.12	363.81	16464.1	1.55384	19.1644	1.87696	0.19121	3.46955	0.0265885	2.91801	169.162	4.87195	177.661	5.65497	292.294	42.8789	169.162	4.87195
SNB-18-45.13	806.626	22158.6	1.53998	19.8457	1.52049	0.190152	4.93865	0.0273814	4.69876	174.139	8.07284	176.759	8.0121	211.933	35.2372	174.139	8.07284
SNB-18-45.17	506.512	8620.06	2.19959	20.2247	1.6732	0.178121	3.18045	0.0261387	2.70475	166.336	4.44143	166.442	4.88255	167.927	39.0761	166.336	4.44143
SNB-18-45.19	689.508	94763	1.62779	19.4579	1.51081	0.189229	2.21569	0.0267159	1.62072	169.961	2.71861	175.971	3.57983	257.481	34.712	169.961	2.71861
SNB-18-45.2	633.8	26297.9	1.98098	19.9852	1.94363	0.177772	3.03486	0.0257787	2.33081	164.074	3.776	166.142	4.6513	195.719	45.1861	164.074	3.776
SNB-18-45.2	699.276	17260.3	1.68226	19.766	1.22827	0.182676	2.18923	0.0261992	1.8122	166.716	2.98251	170.361	3.43351	221.253	28.3909	166.716	2.98251
SNB-18-45.20	342.518	18865	1.52346	19.3355	1.87751	0.185631	3.32449	0.0260432	2.74357	165.736	4.48913	172.895	5.28519	271.963	43.0381	165.736	4.48913
SNB-18-45.20	934.43	6936.63	2.19317	20.7741	2.54164	0.18229	3.25866	0.0274772	2.03935	174.739	3.51568	170.029	5.10166	104.955	60.0524	174.739	3.51568
SNB-18-45.21	167.704	3201.54	2.05264	21.2397	3.76744	0.170651	5.482	0.0262994	3.9823	167.346	6.57846	159.984	8.11447	52.3081	89.9439	167.346	6.57846
SNB-18-45.21	688.073	26694.7	1.57557	19.6667	1.55353	0.18459	2.53165	0.0263407	1.99894	167.605	3.30716	172.002	4.00567	232.931	35.8539	167.605	3.30716
SNB-18-45.23	853.189	16450.9	4.39071	19.7355	1.78012	0.171509	3.10359	0.0245596	2.54233	156.408	3.92857	160.727	4.61358	224.849	41.1649	156.408	3.92857	o
SNB-18-45.23	773.484	10055.4	1.58622	19.7684	1.65766	0.185677	2.65439	0.0266329	2.07315	169.44	3.46698	172.934	4.22074	220.969	38.3502	169.44	3.46698
SNB-18-45.24	944.594	6224.8	2.42878	20.3694	1.54938	0.17113	2.78751	0.0252925	2.31725	161.018	3.68498	160.399	4.13589	151.25	36.2836	161.018	3.68498
SNB-18-45.25	469.869	4295.94	2.28612	20.0729	2.18999	0.176088	3.63026	0.0256465	2.8953	163.244	4.66704	164.689	5.51903	185.492	51.0007	163.244	4.66704
SNB-18-45.27	659.891	4162.09	2.47804	17.6326	4.22332	0.223317	4.55008	0.0285711	1.69318	181.599	3.0319	204.667	8.43416	479.406	93.3814	181.599	3.0319	o,d
SNB-18-45.29	435.79	4081.2	2.43339	20.6344	2.09752	0.179394	3.19806	0.0268589	2.41412	170.859	4.07055	167.539	4.93933	120.913	49.4065	170.859	4.07055
SNB-18-45.3	480.173	14681.2	1.94681	19.8052	1.70048	0.186459	2.78003	0.0267948	2.19931	170.457	3.69974	173.604	4.43622	216.704	39.3738	170.457	3.69974
SNB-18-45.4	591.869	13520.7	1.63816	19.8688	1.63928	0.185925	2.75226	0.0268038	2.21081	170.513	3.72031	173.146	4.38129	209.269	38.0137	170.513	3.72031
SNB-18-45.5	719.522	12568.7	1.73635	19.1427	1.88524	0.186884	5.28008	0.0259575	4.93205	165.198	8.04415	173.967	8.44197	294.919	43.0161	165.198	8.04415
SNB-18-45.5	475.615	16149.2	1.96967	19.8278	1.89732	0.184369	3.30517	0.0265246	2.70635	168.76	4.50798	171.813	5.2243	214.075	43.9727	168.76	4.50798
SNB-18-45.6	222.647	4858.39	2.03782	18.9612	3.1724	0.189032	4.74756	0.0260069	3.53202	165.508	5.77139	175.803	7.66389	316.581	72.1406	165.508	5.77139
SNB-18-45.6	721.563	7284.54	1.61438	19.9363	2.70432	0.194651	3.42701	0.0281572	2.105	179.004	3.71621	180.59	5.66975	201.395	62.8043	179.004	3.71621	o
SNB-18-45.7	744.123	43368.7	1.63984	18.9787	1.47361	0.187256	2.70212	0.0257863	2.26493	164.122	3.67034	174.285	4.32742	314.51	33.5223	164.122	3.67034
SNB-18-45.7	701.261	12719.4	1.80699	19.398	1.2846	0.184654	2.8425	0.0259899	2.53567	165.401	4.14068	172.058	4.49884	264.578	29.4742	165.401	4.14068
SNB-18-45.8	709.951	5330.47	1.68721	20.3486	1.8052	0.172098	2.76614	0.0254096	2.0959	161.755	3.34803	161.238	4.12399	153.645	42.2993	161.755	3.34803
SNB-18-45.9	691.65	51410.4	2.74651	19.5699	1.37544	0.197472	2.04673	0.0280403	1.51567	178.271	2.66498	182.985	3.42714	244.296	31.7087	178.271	2.66498	o
Kca "Cathedreal Peak alaskite" at Shannon Canyon				Isotope Ratios						Apparent Ages (Ma)						Best Age
Analysis	U (ppm)	206Pb/ 204Pb	U/Th	206Pb/ 207Pb	± (%)	207Pb/ 235U	± (%)	206Pb/ 238U	± (%)	206Pb/ 238U	±	207Pb/ 235U	±	206Pb/ 207Pb	±	Best Age (Ma)	± (Ma)	ex?
SNB-19-56.17	641.452	23503.6	3.26005	20.3103	1.98255	0.134219	3.86361	0.0197796	3.31617	126.263	4.14636	127.881	4.6424	158.049	46.4187	126.263	4.14636	o
SNB-19-56.13	1014.48	11188.4	2.98444	20.2595	1.83794	0.137061	2.78443	0.0201478	2.09166	128.59	2.66303	130.422	3.40798	163.909	42.9696	128.59	2.66303	o
SNB-19-56.4	745.341	24692.7	2.27878	19.3939	1.96992	0.151645	2.7348	0.0213394	1.89699	136.116	2.55502	143.364	3.65652	265.051	45.2095	136.116	2.55502
SNB-19-56.17	576.849	14033.2	3.24769	20.5253	1.8655	0.145722	2.79369	0.0217022	2.07958	138.405	2.84756	138.128	3.60792	133.379	43.836	138.405	2.84756
SNB-19-56.18	535.74	7432.81	2.19369	20.2951	2.24974	0.149516	3.20815	0.0220174	2.28711	140.393	3.17624	141.484	4.237	159.807	52.6144	140.393	3.17624
SNB-19-56.29	610.35	66331	1.84447	19.5267	1.82452	0.15589	3.17683	0.022087	2.60066	140.832	3.62284	147.099	4.3504	249.384	41.9826	140.832	3.62284
SNB-19-56.19	1134.45	7029.06	3.51447	20.168	1.90692	0.151194	2.61946	0.0221251	1.79589	141.073	2.50599	142.966	3.49325	174.479	44.4717	141.073	2.50599
SNB-19-56.7	627.442	10937.3	2.94926	19.1415	1.75907	0.16002	2.8628	0.0222248	2.2586	141.702	3.16556	150.721	4.00988	295.058	40.1523	141.702	3.16556
SNB-19-56.4	610.952	7720.35	2.10385	19.7803	3.10084	0.156077	3.86493	0.0224006	2.30706	142.81	3.25848	147.263	5.29818	219.598	71.7737	142.81	3.25848
SNB-19-56.13	762.377	12252.5	3.19283	20.3069	1.74556	0.152191	2.78275	0.0224244	2.1672	142.96	3.06412	143.845	3.73226	158.444	40.8456	142.96	3.06412
SNB-19-56.6	546.332	9252.45	2.06413	18.0139	2.48574	0.172454	3.3604	0.0225407	2.26128	143.693	3.21336	161.546	5.01882	431.943	55.393	143.693	3.21336
SNB-19-56.19	656.176	14995	1.84464	19.3637	1.86057	0.160485	2.82127	0.0225481	2.1208	143.74	3.0147	151.127	3.9616	268.616	42.6755	143.74	3.0147
SNB-19-56.21	384.43	61662.5	2.28819	18.8848	2.10991	0.165241	3.02807	0.0226423	2.17198	144.333	3.10005	155.281	4.36015	325.769	47.8817	144.333	3.10005
SNB-19-56.11	716.826	9201.37	2.43006	20.7338	1.64177	0.151089	2.63711	0.02273	2.06373	144.886	2.95671	142.873	3.51466	109.567	38.7518	144.886	2.95671
SNB-19-56.6	553.983	6165.73	2.43539	16.9696	4.08984	0.184748	4.7272	0.0227478	2.37058	144.999	3.39894	172.138	7.48508	563.504	89.1239	144.999	3.39894
SNB-19-56.30	1141.85	84445.1	2.37388	17.7302	2.18167	0.176926	2.65104	0.0227611	1.50611	145.083	2.1607	165.412	4.04661	467.208	48.3193	145.083	2.1607
SNB-19-56.15	852.466	11749.4	2.79902	20.2666	2.16114	0.154947	2.72595	0.0227852	1.66142	145.234	2.38597	146.27	3.7134	163.082	50.5329	145.234	2.38597
SNB-19-56.26	799.942	295033	1.84691	19.6734	1.04287	0.160417	2.31524	0.022899	2.06706	145.952	2.98301	151.068	3.24984	232.105	24.0554	145.952	2.98301
SNB-19-56.31	719.88	12908.9	2.03867	20.4063	1.74373	0.154814	2.64187	0.0229226	1.98466	146.1	2.86698	146.154	3.59618	147.036	40.8926	146.1	2.86698
SNB-19-56.12	546.463	13235.5	2.12479	20.0918	1.94176	0.157322	2.80045	0.0229349	2.01794	146.178	2.9166	148.357	3.86541	183.3	45.2265	146.178	2.9166
SNB-19-56.9	602.98	5485.69	2.32162	17.8507	2.94811	0.17718	3.89822	0.0229487	2.55044	146.265	3.68838	165.631	5.95761	452.18	65.4708	146.265	3.68838
SNB-19-56.9	607.789	9155.56	1.86441	19.6855	2.01583	0.161215	2.53861	0.0230271	1.54304	146.759	2.23896	151.766	3.57866	230.689	46.578	146.759	2.23896
SNB-19-56.8	972.494	24893.5	2.29469	19.4221	1.4717	0.163445	3.17855	0.0230332	2.81732	146.798	4.08902	153.714	4.53407	261.743	33.7954	146.798	4.08902
SNB-19-56.14	501.156	4089.88	3.08775	21.3082	1.9434	0.149197	3.03215	0.0230671	2.32747	147.011	3.38292	141.202	3.99712	44.6666	46.4307	147.011	3.38292
SNB-19-56.5	512.675	3727.53	2.84807	21.3169	2.58153	0.149154	3.71859	0.0230699	2.67649	147.029	3.89067	141.165	4.90081	43.6918	61.6994	147.029	3.89067
SNB-19-56.20	562.62	12845.8	2.32068	19.8385	1.89118	0.160976	2.6805	0.0231717	1.89961	147.67	2.77328	151.557	3.77386	212.77	43.8406	147.67	2.77328
SNB-19-56.2	731.835	124547	2.48485	16.1003	3.48686	0.198781	4.19038	0.0232218	2.32402	147.986	3.40004	184.094	7.05545	677.001	74.5544	147.986	3.40004
SNB-19-56.16	747.919	14626.8	2.10519	20.4804	2.02293	0.1565	3.01383	0.0232563	2.23404	148.203	3.27315	147.635	4.14114	138.518	47.497	148.203	3.27315
SNB-19-56.15	452.443	15475.8	2.15203	19.8566	1.81698	0.161451	3.13494	0.0232612	2.55469	148.234	3.74371	151.972	4.42488	210.709	42.1274	148.234	3.74371
SNB-19-56.28	804.75	30622.7	1.80407	19.6265	1.51316	0.163581	3.59036	0.023295	3.25592	148.447	4.77809	153.833	5.12515	237.609	34.8961	148.447	4.77809
SNB-19-56.3	712.163	33711.5	3.00748	19.1607	1.90871	0.167882	2.78344	0.0233402	2.02593	148.732	2.97871	157.579	4.06276	292.776	43.585	148.732	2.97871
SNB-19-56.10	399.638	881.746	2.69864	14.696	5.19672	0.21897	5.77918	0.0233492	2.52843	148.788	3.71892	201.053	10.5415	869.043	107.767	148.788	3.71892
SNB-19-56.27	760.8	3163.71	2.18705	15.01	6.72548	0.214763	6.9326	0.0233899	1.68195	149.045	2.47811	197.542	12.4456	825.061	140.487	149.045	2.47811
SNB-19-56.12	617.749	8677.24	2.14847	19.7155	2.07922	0.164344	2.44929	0.0235098	1.29456	149.8	1.91689	154.498	3.5103	227.189	48.051	149.8	1.91689
SNB-19-56.23	734.11	11591.2	1.26645	19.5641	1.57353	0.165962	4.45198	0.023559	4.16462	150.11	6.17928	155.909	6.43449	244.987	36.2571	150.11	6.17928
SNB-19-56.1	682.913	18730.7	2.15009	19.0081	2.41373	0.170951	3.10789	0.0235776	1.95777	150.227	2.90709	160.244	4.60714	310.984	54.9274	150.227	2.90709
SNB-19-56.22	848.387	1803.72	2.27196	9.21061	8.58874	0.360784	8.99015	0.0241114	2.65641	153.588	4.03171	312.8	24.2068	1774.76	157.043	153.588	4.03171
SNB-19-56.3	520.226	7174.35	2.90984	7.45958	6.37861	0.466507	6.74427	0.0252499	2.19053	160.751	3.47775	388.773	21.7874	2150.99	111.506	160.751	3.47775
SNB-19-56.18	827.036	16423.6	1.82459	6.35522	8.59822	0.597612	8.83257	0.0275574	2.02112	175.243	3.49415	475.717	33.5601	2426.64	146.102	175.243	3.49415	o
SNB-19-56.7	577.23	1505.19	3.65528	7.41674	15.5972	1.03527	16.1846	0.0557127	4.32054	349.499	14.6982	721.56	83.7811	2161.04	273.849	349.499	14.6982	o,d
Green Lake diorite				Isotope Ratios						Apparent Ages (Ma)
Analysis	U (ppm)	206Pb/ 204Pb	U/Th	206Pb/ 207Pb	± (%)	207Pb/ 235U	± (%)	206Pb/ 238U	± (%)	206Pb/ 238U	±	207Pb/ 235U	±	206Pb/ 207Pb	±	Best Age (Ma)	± (Ma)	ex?
SNB-19-43 Spot 37	2535.69	20506.6	4.47803	21.1147	1.67341	0.0840609	3.43594	0.0128785	3.0009	82.4904	2.45968	81.9557	2.70531	66.3982	39.8366	82.4904	2.45968
SNB-19-43 Spot 56	999.804	2075.8	2.68985	16.8629	4.96301	0.110745	7.32012	0.0135502	5.38078	86.7638	4.63729	106.647	7.41083	577.249	107.924	86.7638	4.63729
SNB-19-43 Spot 61	1523.94	3360.36	1.76941	20.3065	2.22817	0.0932764	3.55104	0.0137434	2.76498	87.9923	2.41644	90.5509	3.0763	158.49	52.1254	87.9923	2.41644
SNB-19-43 Spot 49	1391.54	3860.64	6.57237	14.0509	7.45297	0.135227	8.51378	0.0137865	4.11555	88.2665	3.60789	128.784	10.2979	961.43	152.454	88.2665	3.60789	d
SNB-19-43 Spot 40	1015.96	2906.67	3.43326	20.462	2.19204	0.0965861	3.35317	0.01434	2.53747	91.7853	2.31252	93.6201	2.99888	140.651	51.4688	91.7853	2.31252
SNB-19-43 Spot 60	826.643	3193.62	9.81319	19.989	2.65031	0.0993664	4.21259	0.0144118	3.27442	92.2413	2.99886	96.1914	3.86615	195.285	61.6095	92.2413	2.99886
SNB-19-43 Spot 38	1433.48	20807	2.5369	20.0636	2.34346	0.0993608	4.17443	0.0144648	3.45457	92.5781	3.17532	96.1862	3.83093	186.569	54.5713	92.5781	3.17532
SNB-19-43 Spot 54	1395.93	2168.09	2.02929	17.7677	4.64128	0.113125	5.6326	0.014584	3.19135	93.3352	2.95719	108.82	5.81242	462.569	102.937	93.3352	2.95719
SNB-19-43 Spot 47	1023.46	203506	4.02789	20.504	1.29788	0.0986929	2.45012	0.0146829	2.07813	93.964	1.93853	95.5691	2.23475	135.798	30.4992	93.964	1.93853
SNB-19-43 Spot 48	4027.04	22777.7	0.4727	20.8496	1.22057	0.0976601	3.79837	0.0147742	3.59692	94.5436	3.37584	94.6142	3.43146	96.3822	28.8705	94.5436	3.37584
SNB-19-43 Spot 53	1492.36	835.597	1.80193	12.9055	11.6876	0.159746	12.2601	0.0149586	3.70271	95.7154	3.51788	150.48	17.1487	1132.85	233.445	95.7154	3.51788	d
SNB-19-43 Spot 65	4677.09	35548.1	0.418357	20.1115	1.16803	0.102855	3.08805	0.0150093	2.85863	96.037	2.72499	99.4088	2.92432	181.02	27.2196	96.037	2.72499
SNB-19-43 Spot 46	1879.3	4393.44	1.91183	19.986	1.97975	0.103902	3.30052	0.0150673	2.64083	96.4058	2.52697	100.372	3.15432	195.635	46.037	96.4058	2.52697
SNB-19-43 Spot 43	767.372	4323.84	1.7207	21.7746	2.66918	0.0980661	3.30537	0.0154938	1.94959	99.1133	1.91753	94.9896	2.99737	NA	NA	99.1133	1.91753
SNB-19-43 Spot 63	1312.16	5722.97	1.00619	20.7659	1.92417	0.103311	3.74752	0.0155662	3.21582	99.5733	3.17749	99.8277	3.56306	105.884	45.4566	99.5733	3.17749
SNB-19-43 Spot 51	1725.94	822.055	1.08988	12.8352	8.36427	0.168482	8.87023	0.0156908	2.95297	100.364	2.94077	158.101	12.9874	1143.75	166.527	100.364	2.94077	d
SNB-19-43 Spot 58	2296.31	15308	0.931092	20.8124	1.79736	0.104982	3.26294	0.0158535	2.72328	101.397	2.73971	101.365	3.14776	100.618	42.511	101.397	2.73971
SNB-19-43 Spot 41	502.078	8426.35	2.46927	19.2291	2.8674	0.114152	4.0449	0.0159268	2.85294	101.862	2.88321	109.756	4.20802	284.615	65.5831	101.862	2.88321
SNB-19-43 Spot 44	1765.5	595.582	2.75493	8.26715	14.0072	0.269337	14.8559	0.0161562	4.9496	103.317	5.07304	242.164	32.0179	1969.65	250.999	103.317	5.07304	d
SNB-19-43 Spot 62	2818.62	13098.1	0.503957	19.5416	1.7555	0.116052	4.73757	0.0164552	4.40032	105.213	4.59215	111.487	5.00217	247.636	40.4183	105.213	4.59215
SNB-19-43 Spot 59	987.275	2601	1.01159	19.968	4.12851	0.113821	4.9029	0.0164909	2.64459	105.44	2.76577	109.455	5.08737	197.702	95.955	105.44	2.76577
SNB-19-43.14	3087.61	10352	12.5704	21.1183	1.24232	0.109419	3.85642	0.0167664	3.65084	107.187	3.88087	105.434	3.86201	65.9892	29.5861	107.187	3.88087
SNB-19-43 Spot 57	1748.86	19002.6	1.06611	18.1624	2.01602	0.128676	3.09146	0.0169574	2.34367	108.398	2.51924	122.907	3.57869	413.622	45.0742	108.398	2.51924
SNB-19-43 Spot 50	1714.97	32827.5	0.758716	20.0571	1.43206	0.116528	2.73175	0.0169584	2.3263	108.404	2.50072	111.919	2.89489	187.328	33.3347	108.404	2.50072
SNB-19-43 Spot 45	2389.62	22448.8	0.534509	19.4448	1.64707	0.128915	3.72599	0.0181884	3.34218	116.196	3.8487	123.122	4.32032	259.025	37.8304	116.196	3.8487
SNB-19-43 Spot 39	768.144	238.277	14.2894	7.11308	9.59811	0.360666	10.1519	0.0186145	3.30704	118.893	3.89582	312.712	27.3296	2233.67	166.508	118.893	3.89582	d
SNB-19-43 Spot 36	986.654	166.788	1.52597	5.59858	3.65798	0.512662	5.05254	0.0208255	3.48529	132.871	4.58356	420.237	17.3888	2639.34	60.7653	132.871	4.58356	d
Bishop Creek gabbro				Isotope Ratios						Apparent Ages (Ma)
Analysis	U (ppm)	206Pb/ 204Pb	U/Th	206Pb/ 207Pb	± (%)	207Pb/ 235U	± (%)	206Pb/ 238U	± (%)	206Pb/ 238U	±	207Pb/ 235U	±	206Pb/ 207Pb	±	Best Age (Ma)	± (Ma)	ex?
SNB-18-23 Spot 141	152.327	945.895	1.71437	28.7341	6.53592	0.100356	7.42914	0.0209233	3.53183	133.489	4.66612	97.1053	6.87998	NA	NA	133.489	4.66612	o
SNB-18-23 Spot 152	317.331	3770.92	1.30811	21.887	2.96309	0.140012	4.14662	0.0222352	2.90078	141.767	4.06746	133.055	5.17112	NA	NA	141.767	4.06746
SNB-18-23 Spot 165	321.525	2811.21	1.21897	22.4561	3.41558	0.136987	4.27182	0.0223204	2.5656	142.304	3.61095	130.356	5.22601	NA	NA	142.304	3.61095
SNB-18-23 Spot 166	217.36	4806.29	1.18508	21.8153	3.36609	0.141373	4.64495	0.0223778	3.20078	142.666	4.51627	134.266	5.84192	NA	NA	142.666	4.51627
SNB-18-23 Spot 149	211.794	1745.24	1.36831	24.9242	5.24953	0.123785	6.45345	0.0223861	3.75359	142.718	5.2982	118.498	7.21797	NA	NA	142.718	5.2982
SNB-18-23 Spot 155	476.672	12663.5	1.18026	21.3149	1.98559	0.145952	3.297	0.0225727	2.63204	143.895	3.74541	138.332	4.26379	43.8979	47.4527	143.895	3.74541
SNB-18-23 Spot 169	167.128	2258.11	1.19137	22.2449	3.32776	0.140298	4.9529	0.0226448	3.66841	144.35	5.23649	133.309	6.18766	NA	NA	144.35	5.23649
SNB-18-23 Spot 18	197.096	17458.1	1.03605	21.7118	3.18174	0.144412	4.32999	0.0227503	2.9369	145.015	4.2114	136.966	5.54808	NA	NA	145.015	4.2114
SNB-18-23 Spot 10	247.111	19330	1.05656	20.1222	2.91958	0.1559	4.10337	0.0227619	2.88334	145.087	4.13664	147.108	5.61953	179.783	68.0634	145.087	4.13664
SNB-18-23 Spot 170	634.785	6323.92	1.03673	20.7592	1.73197	0.151676	2.52813	0.0228462	1.84166	145.619	2.65174	143.391	3.38078	106.695	40.9223	145.619	2.65174
SNB-18-23 Spot 164	288.259	1671.08	1.13694	24.3904	3.29957	0.129187	4.4087	0.0228626	2.92395	145.722	4.21304	123.367	5.12148	NA	NA	145.722	4.21304
SNB-18-23 Spot 9	340.923	4734.43	0.901109	21.7091	2.41807	0.145231	3.46407	0.0228765	2.48047	145.81	3.57617	137.693	4.46053	NA	NA	145.81	3.57617
SNB-18-23 Spot 161	382.296	5509.44	0.995241	20.8645	2.46233	0.151177	3.6102	0.0228865	2.64017	145.873	3.80805	142.95	4.81402	94.7042	58.3207	145.873	3.80805
SNB-18-23 Spot 19	562.536	10472.1	0.819525	20.5851	1.96218	0.15331	5.11809	0.0228986	4.72702	145.949	6.82153	144.83	6.90825	126.556	46.1912	145.949	6.82153
SNB-18-23 Spot 163	248.24	11185.4	1.18132	20.0958	3.33697	0.157233	4.59091	0.0229264	3.15295	146.124	4.5554	148.278	6.3337	182.844	77.7605	146.124	4.5554
SNB-18-23 Spot 142	176.174	8555.39	1.77749	20.2191	3.28877	0.156433	5.43097	0.0229497	4.32197	146.271	6.25062	147.576	7.45972	168.573	76.8204	146.271	6.25062
SNB-18-23 Spot 11	423.474	8103.44	1.21982	20.8082	2.34957	0.152216	4.01867	0.0229818	3.26025	146.473	4.72155	143.867	5.39067	101.101	55.5864	146.473	4.72155
SNB-18-23 Spot 168	290.132	8001.92	1.02877	20.3258	3.12752	0.155882	4.29596	0.0229897	2.94514	146.523	4.26663	147.092	5.88272	156.284	73.2296	146.523	4.26663
SNB-18-23 Spot 5	284.863	14807.4	1.3464	19.7591	3.00665	0.16051	4.76394	0.0230121	3.69528	146.665	5.35848	151.149	6.69043	222.099	69.5583	146.665	5.35848
SNB-18-23 Spot 20	252.125	4814.51	1.13252	21.0172	3.01692	0.151447	4.18252	0.0230953	2.89684	147.189	4.21551	143.189	5.58586	77.3885	71.6802	147.189	4.21551
SNB-18-23 Spot 162	169.62	11963.3	1.1441	19.9547	3.51576	0.159565	5.30609	0.0231032	3.97417	147.238	5.78519	150.323	7.41406	199.231	81.6863	147.238	5.78519
SNB-18-23 Spot 150	910.436	16733.2	1.26617	20.0552	1.73575	0.15911	3.13487	0.0231534	2.61047	147.555	3.80812	149.924	4.36944	187.543	40.4117	147.555	3.80812
SNB-18-23 Spot 16	226.174	3322.38	1.21753	21.9769	3.6856	0.145206	5.34376	0.0231547	3.86939	147.563	5.64493	137.671	6.87996	NA	NA	147.563	5.64493
SNB-18-23 Spot 157	318.368	5589.37	1.06723	21.6783	2.74533	0.147296	3.70556	0.0231689	2.48885	147.652	3.63308	139.522	4.83063	3.3224	66.1209	147.652	3.63308
SNB-18-23 Spot 145	473.794	9044.52	0.832178	20.445	2.21171	0.156367	3.69085	0.0231963	2.95477	147.825	4.31819	147.518	5.06767	142.604	51.9224	147.825	4.31819
SNB-18-23 Spot 1	739.249	26731.3	1.30004	21.1044	2.04877	0.152011	3.25055	0.0232775	2.52362	148.337	3.70071	143.686	4.35521	67.583	48.7502	148.337	3.70071
SNB-18-23 Spot 14	399.029	24634.4	1.03968	20.712	2.33486	0.155316	3.80589	0.0233413	3.00554	148.739	4.41923	146.595	5.19524	112.03	55.1139	148.739	4.41923
SNB-18-23 Spot 15	151.33	10995.4	1.51292	20.1555	4.28149	0.159705	6.18544	0.0233561	4.46414	148.832	6.56794	150.445	8.64934	175.926	99.9277	148.832	6.56794
SNB-18-23 Spot 154	327.35	1741.28	1.33382	23.7131	10.6497	0.136409	11.0995	0.0234703	3.1279	149.551	4.62397	129.84	13.5291	NA	NA	149.551	4.62397
SNB-18-23 Spot 6	627.804	38678	1.70361	20.2096	2.12358	0.160491	3.29778	0.0235339	2.52304	149.952	3.73968	151.133	4.63087	169.672	49.5952	149.952	3.73968
SNB-18-23 Spot 158	141.607	6676.88	1.9091	22.378	3.90164	0.145151	5.50414	0.0235683	3.88237	150.168	5.76271	137.621	7.08406	NA	NA	150.168	5.76271
SNB-18-23 Spot 148	86.4062	28192.5	1.35202	18.8521	4.29362	0.173205	6.30996	0.0236923	4.62389	150.949	6.89866	162.197	9.45924	329.694	97.4211	150.949	6.89866
SNB-18-23 Spot 153	216.888	2843.15	1.13934	20.8099	3.78583	0.157025	5.34696	0.0237097	3.77592	151.059	5.63755	148.096	7.36836	100.919	89.5759	151.059	5.63755
SNB-18-23 Spot 7	458.012	21746	1.34106	20.3467	2.90728	0.161121	4.24908	0.0237867	3.09877	151.544	4.64122	151.684	5.98693	153.857	68.0976	151.544	4.64122
SNB-18-23 Spot 17	212.507	3926.61	1.26549	23.1984	3.01434	0.142226	5.17679	0.0239399	4.20867	152.508	6.34324	135.024	6.54518	NA	NA	152.508	6.34324
SNB-18-23 Spot 167	159.25	4322.78	0.992859	12.8687	5.1302	0.256777	6.67759	0.023976	4.2745	152.736	6.45195	232.066	13.854	1138.58	102.111	152.736	6.45195	d
SNB-18-23 Spot 147	779.36	10800.1	0.913066	20.7604	2.03913	0.159568	3.49845	0.0240364	2.84273	153.116	4.30137	150.325	4.8883	106.554	48.1812	153.116	4.30137
SNB-18-23 Spot 144	2387.39	41615.6	0.995855	20.3992	1.35274	0.162519	2.49828	0.0240549	2.10035	153.232	3.18047	152.905	3.5463	147.837	31.7133	153.232	3.18047
SNB-18-23 Spot 4	111.76	14142.6	1.17643	19.7771	4.1313	0.168662	5.87746	0.0242029	4.18053	154.164	6.3684	158.257	8.61306	219.993	95.6265	154.164	6.3684
SNB-18-23 Spot 146	297.406	3873.01	1.71502	10.6781	11.7666	0.313542	12.5009	0.0242928	4.22153	154.729	6.45418	276.923	30.3078	1500.22	223.24	154.729	6.45418	d
SNB-18-23 Spot 13	165.662	23232.9	1.66969	20.8417	2.79292	0.162713	5.05814	0.0246061	4.21716	156.701	6.52866	153.075	7.18749	97.263	66.0954	156.701	6.52866
SNB-18-23 Spot 3	66.5905	1632.21	1.5547	24.7695	4.38482	0.137341	7.00574	0.0246834	5.46386	157.187	8.48464	130.673	8.59022	NA	NA	157.187	8.48464
SNB-18-23 Spot 143	94.8583	1427.95	1.30237	24.9618	5.3472	0.138444	7.3171	0.0250749	4.99474	159.65	7.87617	131.657	9.03532	NA	NA	159.65	7.87617
SNB-18-23 Spot 156	885.187	7100.73	0.813674	21.2659	1.77046	0.167165	3.45033	0.0257939	2.96147	164.17	4.80044	156.955	5.01772	49.4083	42.2835	164.17	4.80044	o
SNB-18-23 Spot 2	1336.39	168459	1.02308	20.1086	1.51676	0.180309	2.71825	0.026308	2.25573	167.4	3.72748	168.326	4.21641	181.352	35.3313	167.4	3.72748	o
SNB-18-23 Spot 8	808.611	29264.8	1.04896	21.0015	2.86832	0.17542	4.52806	0.026731	3.50373	170.056	5.88041	164.112	6.86174	79.1625	68.1159	170.056	5.88041	o
McMurry Meadows diorite				Isotope Ratios						Apparent Ages (Ma)
Analysis	U (ppm)	206Pb/ 204Pb	U/Th	206Pb/ 207Pb	± (%)	207Pb/ 235U	± (%)	206Pb/ 238U	± (%)	206Pb/ 238U	±	207Pb/ 235U	±	206Pb/ 207Pb	±	Best Age (Ma)	± (Ma)	ex?
SNB-19-64 Spot 187	954.197	6985.36	1.53109	21.047	2.13871	0.14379	4.36522	0.0219586	3.80541	140.022	5.27097	136.414	5.57214	74.0534	50.8332	140.022	5.27097
SNB-19-64 Spot 184	1261.86	3957.51	1.92803	19.419	1.97089	0.157549	3.8662	0.0221989	3.32612	141.538	4.65642	148.555	5.34312	262.07	45.26	141.538	4.65642
SNB-19-64 Spot 76	586.97	57132.7	1.09538	20.1828	2.12028	0.153299	4.3078	0.0224496	3.74987	143.119	5.30764	144.82	5.81416	172.76	49.5038	143.119	5.30764
SNB-19-64 Spot 183	637.91	25319.1	0.884329	19.7199	1.45812	0.157459	3.88132	0.0225298	3.59702	143.625	5.10908	148.476	5.36135	226.661	33.6769	143.625	5.10908
SNB-19-64 Spot 209	501.484	23710.3	1.33106	19.943	2.17079	0.156565	3.50242	0.0226554	2.74858	144.416	3.92526	147.692	4.81422	200.617	50.4099	144.416	3.92526
SNB-19-64 Spot 186	651.407	6322.33	0.964915	20.8194	2.36793	0.150214	4.01518	0.0226916	3.24262	144.645	4.63805	142.101	5.3244	99.8025	56.003	144.645	4.63805
SNB-19-64 Spot 188	428.052	7454.98	1.72014	20.3502	3.41048	0.155178	4.58574	0.0229132	3.06556	146.041	4.42664	146.473	6.25498	153.474	79.904	146.041	4.42664
SNB-19-64 Spot 182	155.236	1601.94	1.48591	24.4572	12.2579	0.129228	12.9162	0.0229325	4.07108	146.163	5.88345	123.404	15.0097	NA	NA	146.163	5.88345
SNB-19-64 Spot 83	889.578	25119	0.906402	20.5153	2.06762	0.154995	3.43109	0.0230719	2.73812	147.041	3.9806	146.313	4.67523	134.537	48.5781	147.041	3.9806
SNB-19-64 Spot 181	195.337	1617.42	1.48382	19.9412	5.26556	0.15976	6.85613	0.0231157	4.39095	147.317	6.39527	150.493	9.59008	200.824	122.355	147.317	6.39527
SNB-19-64 Spot 190	374.041	2153.45	1.6561	23.6422	8.87585	0.135176	9.29132	0.0231887	2.74733	147.777	4.01375	128.738	11.2347	NA	NA	147.777	4.01375
SNB-19-64 Spot 78	210.157	17055.6	1.73301	19.628	3.61736	0.163501	6.02615	0.0232854	4.81967	148.386	7.07005	153.763	8.59873	237.482	83.4566	148.386	7.07005
SNB-19-64 Spot 180	512.684	16589.1	1.01068	18.6843	2.65164	0.172022	3.79637	0.0233211	2.71685	148.611	3.99136	161.172	5.65784	349.966	59.9485	148.611	3.99136
SNB-19-64 Spot 71	523.09	10012.1	0.900126	20.9449	2.6263	0.154024	4.15008	0.0234075	3.21336	149.155	4.73788	145.458	5.62424	85.6049	62.3077	149.155	4.73788
SNB-19-64 Spot 177	153.549	6495.58	2.19347	18.8845	4.37878	0.171064	6.371	0.0234397	4.62773	149.358	6.83244	160.342	9.44993	325.799	99.4376	149.358	6.83244
SNB-19-64 Spot 87	540.374	16702.5	1.10812	20.6449	2.04563	0.15667	3.44382	0.0234686	2.77044	149.54	4.09523	147.784	4.73642	119.681	48.1942	149.54	4.09523
SNB-19-64 Spot 75	720.224	46875.6	0.98545	20.6118	2.38793	0.156943	3.68343	0.0234717	2.80454	149.56	4.14618	148.023	5.07359	123.453	56.2242	149.56	4.14618
SNB-19-64 Spot 82	418.868	138311	1.08053	19.8912	3.03912	0.162947	4.002	0.0235177	2.60379	149.85	3.85677	153.28	5.69375	206.648	70.5035	149.85	3.85677
SNB-19-64 Spot 84	604.709	16869.9	1.11145	20.8826	2.69525	0.155356	4.11376	0.0235396	3.10783	149.987	4.60756	146.63	5.61675	92.654	63.8412	149.987	4.60756
SNB-19-64 Spot 73	1075.02	83012	0.781288	20.395	1.52392	0.160813	4.32707	0.0237977	4.04984	151.613	6.06843	151.415	6.0868	148.32	35.7215	151.613	6.06843
SNB-19-64 Spot 79	378.304	8816.77	1.11596	20.6126	3.9154	0.159702	4.97497	0.0238853	3.06918	152.165	4.61552	150.442	6.95649	123.36	92.2368	152.165	4.61552
SNB-19-64 Spot 81	880.303	24412.3	0.803562	20.0422	1.77446	0.164618	4.11937	0.0239393	3.71759	152.505	5.60296	154.738	5.91235	189.054	41.284	152.505	5.60296
SNB-19-64 Spot 189	437.626	24718.5	0.746169	19.7748	2.03655	0.16818	3.72068	0.0241309	3.11382	153.71	4.72966	157.838	5.43902	220.254	47.1238	153.71	4.72966
SNB-19-64 Spot 88	1062.38	28924.5	0.810527	20.5255	2.00328	0.162415	4.21561	0.0241884	3.70921	154.073	5.64713	152.815	5.98082	133.369	47.0759	154.073	5.64713
SNB-19-64 Spot 206	466.285	9881.76	0.839227	21.2344	1.93614	0.156997	3.25861	0.0241891	2.62104	154.077	3.99054	148.071	4.48976	52.9167	46.1946	154.077	3.99054
SNB-19-64 Spot 80	1243.3	18864.2	1.08744	20.2473	1.41603	0.166616	3.14458	0.0244778	2.80771	155.893	4.32454	156.478	4.56021	165.316	33.1077	155.893	4.32454
SNB-19-64 Spot 185	912.066	3557.86	1.06089	20.1514	2.06845	0.172815	3.57401	0.0252683	2.91463	160.866	4.63063	161.859	5.3474	176.393	48.2413	160.866	4.63063
SNB-19-64 Spot 176	973.119	29625	0.594029	19.8864	2.02051	0.178069	3.66124	0.0256941	3.05323	163.542	4.93052	166.398	5.61928	207.207	46.8498	163.542	4.93052
SNB-19-64 Spot 208	100.974	1929.82	1.49943	22.345	7.68394	0.158772	9.03913	0.025742	4.76056	163.844	7.70159	149.628	12.5764	NA	NA	163.844	7.70159
SNB-19-64 Spot 77	1138.75	283055	0.615891	19.6169	1.52448	0.181355	4.60662	0.0258136	4.34706	164.293	7.05169	169.226	7.18074	238.742	35.1551	164.293	7.05169
SNB-19-64 Spot 85	1220.35	107131	0.609933	20.2789	1.32337	0.177339	3.15239	0.0260938	2.86116	166.054	4.6904	165.768	4.82142	161.69	30.9497	166.054	4.6904
SNB-19-64 Spot 86	1306.1	47805.9	0.563341	20.3319	1.56675	0.181262	3.47007	0.0267408	3.09624	170.118	5.19836	169.146	5.40672	155.58	36.6836	170.118	5.19836
SNB-19-64 Spot 72	1188.98	48468.9	0.542128	20.2514	1.4471	0.185309	3.30158	0.0272295	2.96755	173.185	5.07094	172.619	5.24109	164.841	33.8074	173.185	5.07094
SNB-19-64 Spot 74	1005.73	21739.3	0.65198	20.2765	1.7721	0.185694	4.48314	0.0273199	4.11803	173.753	7.05964	172.949	7.12927	161.948	41.4424	173.753	7.05964	o
SNB-19-64 Spot 207	1029.09	3029.11	0.691506	17.2851	3.97148	0.221296	5.04699	0.0277546	3.1144	176.479	5.42173	202.988	9.28597	523.229	87.1397	176.479	5.42173	o,d
Black Canyon diorite				Isotope Ratios						Apparent Ages (Ma)
Analysis	U (ppm)	206Pb/ 204Pb	U/Th	206Pb/ 207Pb	± (%)	207Pb/ 235U	± (%)	206Pb/ 238U	± (%)	206Pb/ 238U	±	207Pb/ 235U	±	206Pb/ 207Pb	±	Best Age (Ma)	± (Ma)	ex?
SNB-19-23.1r	1139.32	67951.8	2.32502	20.4027	1.72327	0.124357	3.43049	0.0184097	2.96624	117.597	3.4566	119.015	3.85261	147.425	40.3866	117.597	3.4566	o
SNB-19-23.8	683.813	5406.7	1.54485	20.845	2.12741	0.139324	3.51733	0.0210726	2.80103	134.431	3.72646	132.442	4.36743	96.8891	50.3449	134.431	3.72646	o
SNB-19-23 Spot 52	290.325	4912.69	1.48223	21.9854	2.88127	0.135341	4.95718	0.02159	4.03385	137.697	5.49557	128.886	6.00031	NA	NA	137.697	5.49557	o
SNB-19-23 Spot 45	367.292	8602.33	1.74798	21.815	2.63677	0.138081	4.12956	0.0218563	3.17816	139.377	4.38209	131.333	5.08744	NA	NA	139.377	4.38209	o
SNB-19-23 Spot 50	333.445	11096	2.5542	21.2087	2.7132	0.148148	3.667	0.022798	2.46687	145.315	3.54465	140.275	4.80443	55.8167	64.7009	145.315	3.54465
SNB-19-23 Spot 39	341.463	90725.1	1.4156	19.3428	2.51391	0.166494	4.14251	0.0233672	3.29251	148.901	4.84641	156.372	6.00365	271.096	57.62	148.901	4.84641
SNB-19-23 Spot 56	526.74	15353.4	1.61943	19.8792	2.79939	0.16219	4.25292	0.0233943	3.20168	149.072	4.71806	152.618	6.02655	208.071	64.9239	149.072	4.71806
SNB-19-23.5	501.185	72089.1	2.07766	19.6063	2.10348	0.164872	3.38771	0.0234548	2.65555	149.453	3.92316	154.959	4.86865	240	48.4838	149.453	3.92316
SNB-19-23.3	687.929	5420.48	1.97687	20.5205	2.21802	0.158086	2.97404	0.023538	1.98123	149.978	2.93711	149.027	4.12223	133.93	52.1433	149.978	2.93711
SNB-19-23 Spot 41	407.036	24021.4	2.05981	19.8501	2.25931	0.167993	4.01697	0.0241959	3.32139	154.12	5.05821	157.676	5.86658	211.425	52.35	154.12	5.05821	d
SNB-19-23 Spot 43	285.276	43478	1.66426	19.7022	3.18841	0.169624	4.79448	0.0242487	3.58065	154.452	5.46467	159.092	7.06023	228.726	73.6779	154.452	5.46467
SNB-19-23 Spot 38	294.218	10085	2.35914	19.4043	2.91679	0.172523	4.15832	0.0242903	2.96377	154.714	4.53077	161.606	6.21267	263.858	66.9608	154.714	4.53077
SNB-19-23 Spot 51	389.359	61920.6	1.29959	19.9156	2.62907	0.168833	3.30673	0.0243971	2.0056	155.386	3.07917	158.406	4.84995	203.787	61.0209	155.386	3.07917
SNB-19-23 Spot 55	376.587	26864.6	1.35139	20.4749	2.1283	0.164584	4.22345	0.024451	3.64799	155.725	5.61278	154.708	6.06065	139.172	49.9621	155.725	5.61278
SNB-19-23 Spot 57	469.245	75931.3	1.85213	19.8266	2.26439	0.170944	3.63299	0.0245917	2.84097	156.61	4.39565	160.237	5.38536	214.214	52.4569	156.61	4.39565
SNB-19-23 Spot 49	374.789	9389.91	1.72188	19.7577	2.68932	0.171621	4.24389	0.0246033	3.283	156.683	5.08191	160.824	6.31221	222.258	62.2208	156.683	5.08191
SNB-19-23 Spot 53	467.675	27625.2	1.33975	16.7358	4.11231	0.202994	6.73064	0.02465	5.32827	156.977	8.26314	187.656	11.5325	593.676	89.1779	156.977	8.26314
SNB-19-23 Spot 40	273.196	10887.1	2.23726	19.8583	2.36708	0.171349	3.98431	0.0246894	3.20495	157.225	4.97804	160.589	5.91811	210.485	54.8683	157.225	4.97804
SNB-19-23 Spot 37	406.609	17061.7	1.62181	18.1814	2.2204	0.188729	3.37406	0.0248973	2.54049	158.533	3.9784	175.544	5.43928	411.279	49.6573	158.533	3.9784
SNB-19-23 Spot 44	338.308	35792.9	1.26825	19.9707	2.35839	0.172324	3.56762	0.0249705	2.67691	158.993	4.20405	161.434	5.32488	197.369	54.8098	158.993	4.20405
SNB-19-23 Spot 46	360.118	55792.7	1.50693	19.4961	2.76048	0.176901	4.03467	0.0250245	2.94249	159.333	4.6309	165.39	6.15791	253.002	63.4789	159.333	4.6309
SNB-19-23 Spot 68	515.958	105256	1.51089	20.0759	2.0533	0.171918	3.2463	0.0250429	2.51444	159.449	3.96007	161.082	4.83555	185.14	47.824	159.449	3.96007
SNB-19-23.1c	776.872	45939.4	1.63857	20.0435	1.57814	0.172298	3.61776	0.0250577	3.25541	159.542	5.12998	161.411	5.39902	188.902	36.7109	159.542	5.12998
SNB-19-23 Spot 48	677.221	24296.3	1.64954	20.2751	2.06476	0.170775	4.10671	0.0251232	3.5499	159.954	5.60833	160.092	6.08247	162.121	48.2828	159.954	5.60833
SNB-19-23 Spot 42	534.216	32987.9	1.29762	19.9237	2.19963	0.174179	3.8111	0.0251799	3.11225	160.31	4.92772	163.039	5.74045	202.855	51.0776	160.31	4.92772
SNB-19-23 Spot 70	481.037	32342	1.58855	21.0969	2.21836	0.166558	3.80902	0.025496	3.09637	162.297	4.96259	156.427	5.52212	68.399	52.7708	162.297	4.96259
SNB-19-23 Spot 66	374.857	314820	1.37145	18.8419	2.18374	0.1865	3.52444	0.0254971	2.76639	162.305	4.43393	173.638	5.62516	330.933	49.5126	162.305	4.43393
SNB-19-23.4	720.512	12707.4	1.98621	19.7457	1.48341	0.178214	2.34466	0.025533	1.81574	162.53	2.91423	166.522	3.60104	223.669	34.3052	162.53	2.91423
SNB-19-23 Spot 69	214.522	12891.5	1.64514	20.3429	2.87767	0.175341	4.25013	0.0258811	3.12771	164.718	5.08664	164.043	6.43808	154.295	67.3899	164.718	5.08664
SNB-19-23 Spot 47	1942.84	87319.3	2.50023	20.1598	1.74996	0.179817	3.06644	0.0263029	2.51807	167.368	4.1602	167.903	4.74551	175.429	40.8243	167.368	4.1602
SNB-19-23.7	526.067	6383.16	1.89864	21.0558	2.28498	0.172825	5.75274	0.0264038	5.27948	168.001	8.75503	161.868	8.60773	73.0657	54.3301	168.001	8.75503
SNB-19-23 Spot 67	1131.93	44446.4	1.96733	20.0799	1.57161	0.181666	3.48876	0.026468	3.11472	168.405	5.17742	169.493	5.44607	184.684	36.6078	168.405	5.17742
SNB-19-23 Spot 54	1651.95	96020.1	3.91204	20.0527	2.51931	0.186552	4.6945	0.0271432	3.96124	172.644	6.74808	173.683	7.49447	187.835	58.6475	172.644	6.74808
Cargyle Meadows diorite				Isotope Ratios						Apparent Ages (Ma)
Analysis	U (ppm)	206Pb/ 204Pb	U/Th	206Pb/ 207Pb	± (%)	207Pb/ 235U	± (%)	206Pb/ 238U	± (%)	206Pb/ 238U	±	207Pb/ 235U	±	206Pb/ 207Pb	±	Best Age (Ma)	± (Ma)	ex?
SNB-19-14.6	505.368	91630.3	1.37541	20.1635	2.41468	0.0943692	3.71488	0.0138065	2.82305	88.3938	2.47837	91.5653	3.25269	174.993	56.3168	88.3938	2.47837
SNB-19-14 Spot 74	244.096	6829.52	2.86219	22.0925	3.76911	0.0867998	6.12603	0.013914	4.82929	89.0771	4.2722	84.5179	4.968	NA	NA	89.0771	4.2722
SNB-19-14 Spot 88	227.911	2569.35	1.27837	23.1437	6.10033	0.0831967	7.423	0.013971	4.22928	89.4394	3.75652	81.1459	5.78912	NA	NA	89.4394	3.75652
SNB-19-14.9	570.157	4686.96	2.51076	21.1489	2.55075	0.0921649	3.22351	0.014143	1.97096	90.5328	1.7719	89.5181	2.76209	62.5599	60.7538	90.5328	1.7719
SNB-19-14 Spot 73	320.235	4302.63	2.76232	23.3116	3.4429	0.0849273	4.44178	0.014365	2.80638	91.9441	2.56199	82.7669	3.53049	NA	NA	91.9441	2.56199
SNB-19-14 Spot 90	594.459	11007.3	1.31765	21.3775	2.67181	0.0926404	3.93205	0.0143696	2.88486	91.9732	2.63446	89.96	3.38512	36.8517	63.9405	91.9732	2.63446
SNB-19-14 Spot 89	254.457	4551.15	1.56894	22.1246	4.17121	0.0895283	5.5586	0.0143722	3.6741	91.9898	3.3558	87.0639	4.63789	NA	NA	91.9898	3.3558
SNB-19-14.14	17234.4	58579.6	6.73423	22.2082	1.8848	0.0897349	4.12408	0.0144598	3.66818	92.5462	3.37051	87.2564	3.44825	NA	NA	92.5462	3.37051
SNB-19-14 Spot 71	542.727	4832.53	1.62233	23.0209	2.6279	0.0873773	3.49473	0.0145952	2.30376	93.4064	2.13634	85.0573	2.85143	NA	NA	93.4064	2.13634
SNB-19-14.8	479.931	6771.9	1.55134	20.8937	3.01679	0.0964465	3.41112	0.0146214	1.59208	93.5733	1.47901	93.4909	3.04668	91.364	71.4901	93.5733	1.47901
SNB-19-14 Spot 76	603.379	14684.3	2.27876	21.056	2.69058	0.0971261	4.28433	0.0148388	3.33411	94.9543	3.14268	94.12	3.85118	73.0287	63.9742	94.9543	3.14268
SNB-19-14 Spot 77	2082.66	53988.3	1.27067	20.3769	1.27518	0.113214	2.53664	0.0167389	2.19282	107.013	2.32723	108.901	2.61946	150.378	29.8617	107.013	2.32723	o
SNB-19-14 Spot 75	751.173	10867.2	0.818677	21.5667	2.5156	0.107725	3.85937	0.0168573	2.92686	107.763	3.12787	103.882	3.81094	15.738	60.4412	107.763	3.12787	o
SNB-19-14 Spot 72	2036.31	71932.9	1.39972	20.1856	1.68714	0.116103	2.77083	0.0170049	2.19797	108.699	2.36914	111.533	2.92672	172.444	39.3697	108.699	2.36914	o
SNB-19-14.2	6419.79	46365.5	3.10156	21.031	1.04756	0.125635	3.76288	0.0191716	3.61412	122.418	4.38259	120.167	4.26446	75.8212	24.8938	122.418	4.38259	o
SNB-19-14.5	6772.3	128048	2.68638	21.2696	1.12074	0.131656	5.93573	0.0203183	5.82896	129.667	7.48276	125.585	7.01192	48.9496	26.7449	129.667	7.48276	o
Keough diorite				Isotope Ratios						Apparent Ages (Ma)
Analysis	U (ppm)	206Pb/ 204Pb	U/Th	206Pb/ 207Pb	± (%)	207Pb/ 235U	± (%)	206Pb/ 238U	± (%)	206Pb/ 238U	±	207Pb/ 235U	±	206Pb/ 207Pb	±	Best Age (Ma)	± (Ma)	ex?
SNB-18-53.16	352.983	2739.91	1.31338	22.2619	3.72786	0.0841607	4.47384	0.0135944	2.47351	87.0446	2.13859	82.0491	3.52637	NA	NA	87.0446	2.13859
SNB-18-53.3	355.946	8236.14	1.18374	21.3062	3.36154	0.0881413	4.48735	0.0136261	2.97261	87.2467	2.57603	85.7705	3.69076	44.8672	80.3617	87.2467	2.57603
SNB-18-53.21	429.102	23868.3	1.26232	20.6483	3.11193	0.0909958	4.11648	0.0136331	2.69468	87.2908	2.33635	88.4306	3.48623	119.313	73.3692	87.2908	2.33635
SNB-18-53 Spot 170	191.609	3146.77	1.12644	23.6569	6.55062	0.0797139	8.194	0.013683	4.92251	87.608	4.28334	77.8759	6.14266	NA	NA	87.608	4.28334
SNB-18-53.19	320.396	4102.08	2.08378	21.5115	3.06394	0.0879277	4.70125	0.0137241	3.56567	87.8697	3.11189	85.5711	3.85808	21.9	73.5524	87.8697	3.11189
SNB-18-53 Spot 151	548.817	37142.7	1.19023	21.2905	2.40668	0.0891199	3.84061	0.0137673	2.99303	88.1443	2.62023	86.6831	3.19103	46.6191	57.4859	88.1443	2.62023
SNB-18-53 Spot 145	368.978	504173	0.983436	20.6639	2.33564	0.0922304	3.33992	0.0138285	2.38743	88.5333	2.09922	89.5789	2.86369	117.519	55.0694	88.5333	2.09922
SNB-18-53 Spot 169	419.149	26911	1.49643	20.3609	3.38517	0.0938951	4.01628	0.0138716	2.16128	88.8076	1.90622	91.1253	3.50044	152.272	79.3095	88.8076	1.90622
SNB-18-53.4	183.072	1654.9	1.42512	24.8413	3.87926	0.0769722	5.28436	0.0138738	3.58828	88.8217	3.16532	75.2943	3.83489	NA	NA	88.8217	3.16532
SNB-18-53 Spot 168	192.819	2583.48	1.30254	19.6637	4.12698	0.0973686	5.32571	0.0138923	3.36618	88.9389	2.97329	94.3445	4.79818	233.281	95.289	88.9389	2.97329
SNB-18-53 Spot 141	298.302	13064.8	1.3507	21.3864	3.54456	0.0901534	4.64522	0.0139897	3.00237	89.5582	2.67027	87.6463	3.90061	35.8541	84.877	89.5582	2.67027
SNB-18-53 Spot 147	161.877	13225.6	1.96118	19.3832	5.17855	0.100401	7.1956	0.0141206	4.99593	90.3903	4.48432	97.1465	6.66639	266.339	118.882	90.3903	4.48432
SNB-18-53 Spot 148	259.325	4580.37	1.1864	21.44	3.90778	0.0907972	5.99214	0.0141249	4.54257	90.4177	4.07862	88.2457	5.06458	29.9037	93.6695	90.4177	4.07862
SNB-18-53 Spot 146	274.902	95563.6	1.13544	20.2067	3.03734	0.0963697	3.91114	0.0141294	2.46406	90.4463	2.21309	93.4198	3.49075	170.006	70.9346	90.4463	2.21309
SNB-18-53 Spot 154	232.348	8960.18	1.07719	19.4116	3.60488	0.101091	5.34241	0.0142385	3.94286	91.1399	3.56824	97.7832	4.98036	262.975	82.8063	91.1399	3.56824
SNB-18-53 Spot 166	247.326	13019.3	1.1494	17.7071	4.40241	0.112884	6.44622	0.0145033	4.70877	92.8225	4.33948	108.6	6.6393	470.131	97.5084	92.8225	4.33948
SNB-18-53 Spot 150	153.176	2760.68	1.08072	21.8893	4.28561	0.091706	6.40551	0.0145652	4.76069	93.2162	4.4058	89.0913	5.46361	NA	NA	93.2162	4.4058
SNB-18-53 Spot 142	406.368	5007.36	1.19779	21.2082	2.95995	0.0948297	4.23996	0.0145927	3.03578	93.3907	2.8147	91.9925	3.72899	55.8645	70.611	93.3907	2.8147
SNB-18-53 Spot 143	2613.74	376655	1.50023	20.7797	1.71151	0.116326	2.79449	0.0175389	2.20904	112.083	2.45456	111.735	2.95677	104.308	40.4477	112.083	2.45456	o
SNB-18-53 Spot 152	2450.65	130297	0.991141	20.3255	1.39121	0.125907	2.73923	0.0185685	2.35964	118.602	2.77301	120.413	3.11032	156.332	32.5687	118.602	2.77301	o
SNB-18-53 Spot 149	3838.77	89360	1.36217	21.0756	1.17675	0.130257	1.99759	0.0199191	1.6142	127.144	2.03226	124.328	2.33755	70.8044	27.9735	127.144	2.03226	o
Casa Diablo gabbro				Isotope Ratios						Apparent Ages (Ma)
Analysis	U (ppm)	206Pb/ 204Pb	U/Th	206Pb/ 207Pb	± (%)	207Pb/ 235U	± (%)	206Pb/ 238U	± (%)	206Pb/ 238U	±	207Pb/ 235U	±	206Pb/ 207Pb	±	Best Age (Ma)	± (Ma)	ex?
SNB-19-8 Spot 176	637.336	23828.3	1.64011	22.0128	2.47997	0.0890678	3.47239	0.0142261	2.43048	91.0609	2.19766	86.6347	2.88354	NA	NA	91.0609	2.19766
SNB-19-8 Spot 178	702.487	59163.8	2.46523	19.5629	2.35481	0.101198	3.86179	0.0143647	3.06077	91.9417	2.79416	97.882	3.60354	245.121	54.2436	91.9417	2.79416
SNB-19-8 Spot 197	374.733	4076.19	2.02289	22.7745	3.38742	0.0872781	4.40478	0.0144225	2.81558	92.3095	2.58053	84.9646	3.59022	NA	NA	92.3095	2.58053
SNB-19-8 Spot 188	350.742	97555.9	2.21204	20.3678	3.83156	0.0976644	5.18582	0.0144334	3.49456	92.3783	3.20519	94.6181	4.68509	151.468	89.7909	92.3783	3.20519
SNB-19-8 Spot 183	578.62	20419	1.75843	21.3997	2.76417	0.0944111	3.7786	0.0146595	2.57627	93.8152	2.39943	91.6042	3.30982	34.4066	66.1983	93.8152	2.39943
SNB-19-8 Spot 195	903.385	14026.7	2.60755	18.5788	4.56934	0.109615	5.56705	0.0147767	3.18013	94.56	2.98519	105.614	5.58418	362.717	103.09	94.56	2.98519
SNB-19-8 Spot 189	482.34	12562	1.55466	20.3523	3.15196	0.101004	4.18262	0.0149157	2.74945	95.4424	2.60482	97.703	3.89612	153.24	73.8661	95.4424	2.60482
SNB-19-8 Spot 180	884.957	8960.41	1.66102	21.4511	2.27074	0.0975143	3.46133	0.0151777	2.61238	97.1068	2.51779	94.4793	3.12271	28.6591	54.4212	97.1068	2.51779
SNB-19-8 Spot 181	735.123	26155.5	2.28974	20.4405	2.23407	0.102533	3.04402	0.0152069	2.0676	97.2922	1.99651	99.1114	2.87441	143.109	52.4432	97.2922	1.99651
SNB-19-8 Spot 179	1183.29	14659.3	1.32121	21.5453	1.87909	0.0981271	3.01376	0.0153401	2.35622	98.1379	2.29484	95.046	2.73449	18.1071	45.1423	98.1379	2.29484
SNB-19-8 Spot 177	725.909	14790.2	2.09716	19.9485	3.99862	0.106415	4.97576	0.0154028	2.96129	98.536	2.89575	102.681	4.85933	199.949	92.8867	98.536	2.89575
SNB-19-8 Spot 182	1021.03	126189	1.16707	20.1905	1.96728	0.106121	4.05026	0.0155466	3.54039	99.4491	3.49387	102.411	3.94561	171.88	45.9109	99.4491	3.49387
SNB-19-8 Spot 190	653.286	91645.9	2.35976	19.6551	2.84431	0.109228	4.30985	0.0155775	3.238	99.6446	3.20169	105.259	4.30931	234.301	65.6749	99.6446	3.20169
SNB-19-8 Spot 198	863.33	371873	2.15613	20.5433	2.46983	0.104534	3.69394	0.0155817	2.74684	99.6719	2.71677	100.953	3.54977	131.297	58.1031	99.6719	2.71677
SNB-19-8 Spot 193	1350.96	17417.6	2.01966	20.965	2.33864	0.103921	3.61697	0.0158083	2.75921	101.11	2.76807	100.389	3.45734	83.2931	55.4998	101.11	2.76807
SNB-19-8 Spot 191	2159.23	81282.5	3.46817	20.4177	1.79333	0.106775	3.1597	0.0158184	2.60148	101.174	2.61147	103.011	3.09519	145.74	42.057	101.174	2.61147
SNB-19-8 Spot 196	2290.92	36937.4	1.45569	20.59	1.4132	0.109015	2.52053	0.0162867	2.08709	104.145	2.15613	105.064	2.51578	125.99	33.2624	104.145	2.15613
SNB-19-8 Spot 187	2437.23	137168	1.81278	20.1372	1.79771	0.115012	2.84014	0.0168046	2.19879	107.43	2.34257	110.54	2.97464	178.04	41.9184	107.43	2.34257
SNB-19-8.2	10665.2	349286	1.40758	21.015	0.68299	0.110251	3.52451	0.0168113	3.4577	107.472	3.68524	106.195	3.5538	77.6313	16.2212	107.472	3.68524
SNB-19-8 Spot 185	2929.22	63873.6	2.42798	20.911	1.35749	0.111611	2.67479	0.0169345	2.30472	108.253	2.47409	107.438	2.72694	89.4456	32.1932	108.253	2.47409
SNB-19-8 Spot 200	979.15	30094.5	1.02214	20.6053	1.79893	0.113857	4.88663	0.0170227	4.54345	108.812	4.90232	109.488	5.07194	124.198	42.3654	108.812	4.90232
SNB-19-8 Spot 194	1587.59	82361.4	1.08307	20.8673	1.39237	0.113858	3.03298	0.0172392	2.69449	110.184	2.94368	109.489	3.14801	94.3999	32.9871	110.184	2.94368
SNB-19-8 Spot 192	3631.31	103971	1.67308	20.8446	1.42713	0.117613	2.84215	0.0177884	2.45787	113.663	2.76921	112.906	3.03698	96.9388	33.7788	113.663	2.76921
SNB-19-8 Spot 186	3477.87	127605	12.35	21.0822	1.70496	0.117123	2.76472	0.0179162	2.17642	114.473	2.46942	112.46	2.94322	70.0499	40.5544	114.473	2.46942
SNB-19-8.4	4328.23	106205	0.768753	21.0815	0.97863	0.160119	3.0805	0.0244924	2.92092	155.985	4.50152	150.807	4.31711	70.1259	23.2983	155.985	4.50152	o
SNB-19-8.5	3617.4	32766.9	0.631652	20.8987	0.940275	0.180261	3.99249	0.0273345	3.88019	173.844	6.65533	168.285	6.19161	90.8107	22.2906	173.844	6.65533	o
Tamarack Lakes diorite				Isotope Ratios						Apparent Ages (Ma)
Analysis	U (ppm)	206Pb/ 204Pb	U/Th	206Pb/ 207Pb	± (%)	207Pb/ 235U	± (%)	206Pb/ 238U	± (%)	206Pb/ 238U	±	207Pb/ 235U	±	206Pb/ 207Pb	±	Best Age (Ma)	± (Ma)	ex?
SNB-18-13 Spot 89	1277.54	45005	1.42567	19.9784	2.33813	0.0977582	4.0646	0.014171	3.32477	90.711	2.99481	94.7049	3.67533	196.52	54.3534	90.711	2.99481
SNB-18-13 spot 9	265.942	19492.4	1.88637	19.7707	2.951	0.0989749	4.84627	0.0141982	3.84421	90.884	3.46926	95.8296	4.43177	220.73	68.2908	90.884	3.46926	d
SNB-18-13 spot 5	275.656	3405.06	1.61964	23.1092	3.37497	0.0852087	4.65927	0.0142875	3.21222	91.4515	2.91688	83.0303	3.71467	NA	NA	91.4515	2.91688
SNB-18-13 Spot 88	467.566	4675.32	1.85511	21.8303	3.7833	0.0904593	7.05475	0.0143285	5.95451	91.7118	5.42233	87.9311	5.94238	NA	NA	91.7118	5.42233
SNB-18-13 spot 13	783.772	40667.6	1.89944	20.5935	2.49948	0.0962053	4.04954	0.0143753	3.18612	92.0094	2.91071	93.2675	3.60865	125.543	58.8533	92.0094	2.91071
SNB-18-13 Spot 82	1043.64	28730.4	1.71744	19.5841	2.75023	0.101688	4.51376	0.0144497	3.57914	92.482	3.28643	98.3329	4.23038	242.602	63.3893	92.482	3.28643
SNB-18-13 spot 3	365.993	4893.83	1.99616	22.0831	3.72774	0.0909671	4.79432	0.0145758	3.01488	93.2832	2.79212	88.4039	4.05912	NA	NA	93.2832	2.79212
SNB-18-13 Spot 77	691.699	3902.34	1.39277	21.2018	3.41029	0.0952772	4.59136	0.0146572	3.07417	93.8005	2.86271	92.4074	4.05544	56.5985	81.3259	93.8005	2.86271
SNB-18-13 Spot 74	836.709	8544.7	1.43551	20.4988	3.43222	0.0986568	4.19696	0.0146738	2.41543	93.9064	2.2518	95.5357	3.82676	136.384	80.685	93.9064	2.2518
SNB-18-13 Spot 72	404.336	77957.8	3.43469	20.7557	3.77455	0.0974399	5.99653	0.0146744	4.65952	93.9102	4.34405	94.4104	5.40618	107.092	89.1834	93.9102	4.34405
SNB-18-13 Spot 87	1334.59	8302.92	1.8322	19.0957	3.06842	0.105967	4.33084	0.0146823	3.0563	93.96	2.85087	102.269	4.21339	300.529	69.9881	93.96	2.85087
SNB-18-13 Spot 93	567.858	3796.44	1.53936	19.1851	4.67698	0.105551	6.13774	0.0146931	3.97463	94.0288	3.71017	101.888	5.95014	289.83	106.91	94.0288	3.71017
SNB-18-13 Spot 71	671.469	3977.33	1.81903	22.3745	3.17963	0.0906176	4.10413	0.0147114	2.59496	94.1447	2.42527	88.0785	3.46252	NA	NA	94.1447	2.42527
SNB-18-13 spot 14	359.465	8729.82	1.56432	20.4765	2.99105	0.0992292	4.30437	0.0147429	3.09535	94.3452	2.89905	96.0646	3.94541	138.947	70.2695	94.3452	2.89905
SNB-18-13 Spot 81	1647.9	87147.4	1.67397	20.2183	2.78785	0.100956	3.69039	0.0148103	2.41803	94.7731	2.27488	97.658	3.43609	168.659	65.1258	94.7731	2.27488
SNB-18-13 spot 11	229.802	33821.5	1.74658	20.4999	3.55204	0.0997143	5.37439	0.0148319	4.03324	94.9103	3.79992	96.5126	4.94811	136.263	83.4784	94.9103	3.79992
SNB-18-13 spot 2	419.703	7915.73	1.7298	19.2119	2.41047	0.106574	3.52455	0.0148562	2.57141	95.0646	2.42656	102.826	3.44671	286.641	55.1128	95.0646	2.42656
SNB-18-13 Spot 83	548.147	4271.08	1.5142	22.3859	3.62006	0.0915322	5.31954	0.0148674	3.89778	95.1362	3.68097	88.9297	4.52944	NA	NA	95.1362	3.68097
SNB-18-13 Spot 78	734.574	14436.1	1.5322	21.9514	3.2332	0.0935466	4.49587	0.0148997	3.12398	95.3413	2.95653	90.8018	3.90514	NA	NA	95.3413	2.95653
SNB-18-13 spot 6	130.907	2477.6	2.53925	24.851	8.55566	0.0828092	9.86162	0.0149317	4.90431	95.5446	4.65125	80.7826	7.65795	NA	NA	95.5446	4.65125
SNB-18-13 spot 1	121.453	9472.43	3.68805	20.7362	5.03091	0.0993567	6.79518	0.0149491	4.56775	95.6546	4.337	96.1823	6.23583	109.265	118.842	95.6546	4.337
SNB-18-13 Spot 75	730.299	96474.8	1.49937	20.9613	2.93959	0.0983858	4.04733	0.0149637	2.78202	95.7475	2.64403	95.2852	3.6811	83.7075	69.7434	95.7475	2.64403
SNB-18-13 Spot 79	350.98	25105.5	1.73093	18.5831	5.06258	0.111147	6.66586	0.0149866	4.33636	95.893	4.12749	107.014	6.77047	362.205	114.253	95.893	4.12749
SNB-18-13 Spot 92	934.752	15926.8	1.37228	18.4779	3.09466	0.112107	3.92291	0.0150304	2.41086	96.1713	2.30135	107.891	4.01537	374.998	69.6402	96.1713	2.30135
SNB-18-13 Spot 94	535.415	3166.15	1.49801	19.5284	4.02815	0.106197	5.38224	0.0150476	3.56966	96.2802	3.41134	102.48	5.24657	249.192	92.7491	96.2802	3.41134
SNB-18-13 spot 7	373.377	15187.9	1.50731	21.6116	3.20711	0.0960277	4.21443	0.0150581	2.73421	96.3474	2.61475	93.103	3.74926	10.7175	77.1639	96.3474	2.61475
SNB-18-13 spot 8	530.058	32870.3	2.06554	21.0881	2.87315	0.0985679	4.14437	0.0150821	2.98677	96.4995	2.86076	95.4535	3.77571	69.3949	68.3675	96.4995	2.86076
SNB-18-13 Spot 84	1037.31	10971.9	1.26894	20.001	2.75611	0.103992	3.77112	0.0150917	2.57395	96.5603	2.46689	100.454	3.60691	193.892	64.0765	96.5603	2.46689
SNB-18-13 Spot 76	619.521	72996.4	1.25674	19.478	3.87376	0.10683	4.75967	0.0150983	2.76558	96.6021	2.6517	103.062	4.66469	255.123	89.101	96.6021	2.6517
SNB-18-13 Spot 90	841.902	6883.13	1.60786	19.666	3.21022	0.106676	4.54512	0.015222	3.21755	97.3878	3.10995	102.92	4.4486	233.012	74.1185	97.3878	3.10995
SNB-18-13 Spot 95	445.888	11452.5	2.01013	20.0014	3.56303	0.10539	5.308	0.0152949	3.93442	97.851	3.8208	101.739	5.13863	193.838	82.8813	97.851	3.8208
SNB-18-13 spot 4	125.346	1886.69	2.42207	27.2834	4.18136	0.0773203	6.71027	0.0153066	5.24823	97.9254	5.10052	75.6225	4.89015	NA	NA	97.9254	5.10052
SNB-18-13 Spot 91	324.548	22555.7	2.10209	18.8766	5.07967	0.111883	6.84001	0.0153241	4.58068	98.0365	4.45677	107.687	6.98874	326.768	115.34	98.0365	4.45677
SNB-18-13 Spot 85	420.188	3036.23	1.52723	10.1738	6.53596	0.208923	8.03816	0.0154226	4.67901	98.6617	4.58125	192.649	14.106	1591.13	122.229	98.6617	4.58125	d
SNB-18-13 spot 10	225.589	4116.55	2.78112	22.2401	3.78586	0.0956132	5.04935	0.0154291	3.34114	98.7031	3.27269	92.7189	4.47434	NA	NA	98.7031	3.27269
SNB-18-13 Spot 73	227.161	5306.97	2.90113	13.2166	7.33841	0.161556	8.92029	0.0154928	5.07143	99.1075	4.98773	152.064	12.5984	1085.26	147.335	99.1075	4.98773	d
SNB-18-13 Spot 86	1216.96	351257	1.08551	19.9845	2.75029	0.114915	4.20281	0.0166632	3.17798	106.533	3.35776	110.452	4.39854	195.81	63.9507	106.533	3.35776	o
Mount Alice diorite				Isotope Ratios						Apparent Ages (Ma)
Analysis	U (ppm)	206Pb/ 204Pb	U/Th	206Pb/ 207Pb	± (%)	207Pb/ 235U	± (%)	206Pb/ 238U	± (%)	206Pb/ 238U	±	207Pb/ 235U	±	206Pb/ 207Pb	±	Best Age (Ma)	± (Ma)	ex?
SNB-18-CB4.19	388.966	9031.99	2.12804	20.0551	2.50989	0.15174	4.13591	0.0220807	3.28728	140.793	4.57807	143.447	5.53287	187.557	58.4344	140.793	4.57807
SNB-18-CB4 Spot 21	503.27	59178.2	1.14339	19.9243	3.16877	0.153043	4.31281	0.022125	2.92561	141.072	4.0824	144.595	5.8125	202.806	73.5815	141.072	4.0824
SNB-18-CB4.11	575.789	19191.1	1.99406	20.647	1.71141	0.149404	3.55099	0.0223825	3.11137	142.696	4.39101	141.386	4.68675	119.452	40.3432	142.696	4.39101
SNB-18-CB4 Spot 9	282.697	20669.5	1.76806	20.5698	3.20074	0.150144	4.83147	0.0224092	3.61916	142.864	5.11362	142.039	6.4043	128.305	75.3368	142.864	5.11362
SNB-18-CB4 Spot 11	483.761	11915.8	1.11543	20.0121	3.22351	0.154693	4.11872	0.0224622	2.56375	143.198	3.63077	146.047	5.60275	192.592	74.9767	143.198	3.63077
SNB-18-CB4.1	265.262	3921.67	2.02157	20.3298	2.89481	0.15254	3.9185	0.0225012	2.64098	143.444	3.74649	144.152	5.26603	155.846	67.7708	143.444	3.74649
SNB-18-CB4.15	426.048	25998.3	2.30012	19.7904	2.0696	0.157131	3.67623	0.0225634	3.03832	143.836	4.3218	148.189	5.06892	218.409	47.9191	143.836	4.3218
SNB-18-CB4 Spot 17	276.53	26941.9	1.69835	20.7618	3.47479	0.149807	5.43015	0.0225677	4.17281	143.863	5.93666	141.742	7.18385	106.345	82.109	143.863	5.93666
SNB-18-CB4 Spot 2	1000.65	105432	0.995606	19.7581	1.83393	0.157574	3.57103	0.0225901	3.06414	144.004	4.36358	148.577	4.93584	222.17	42.4298	144.004	4.36358
SNB-18-CB4.20	265.484	2594.64	2.35851	22.0472	4.002	0.14205	5.24995	0.0227238	3.39793	144.848	4.86694	134.868	6.63051	NA	NA	144.848	4.86694
SNB-18-CB4.4	439.188	3221.73	1.77464	21.7383	2.47848	0.144396	3.37003	0.0227755	2.28347	145.173	3.27794	136.952	4.31762	NA	NA	145.173	3.27794
SNB-18-CB4 Spot 16	914	333804	1.10848	20.4029	1.55502	0.153881	3.37397	0.0227806	2.99425	145.205	4.29922	145.333	4.56876	147.412	36.4643	145.205	4.29922
SNB-18-CB4.14	259.316	45119.6	2.0627	20.0671	2.4541	0.156637	4.72188	0.0228069	4.03405	145.371	5.79873	147.755	6.49304	186.166	57.1448	145.371	5.79873
SNB-18-CB4.21	391.507	6422.72	1.80019	21.7509	2.31289	0.144808	3.58339	0.0228538	2.73701	145.667	3.94221	137.317	4.60243	NA	NA	145.667	3.94221
SNB-18-CB4 Spot 20	737.983	37754.2	1.13396	20.1589	2.21602	0.156288	4.02138	0.0228603	3.3557	145.708	4.83467	147.449	5.51911	175.527	51.6983	145.708	4.83467
SNB-18-CB4.12	467.771	29506.5	1.24697	19.8682	3.00651	0.159353	4.44091	0.0229724	3.26842	146.414	4.73151	150.137	6.19801	209.335	69.7164	146.414	4.73151
SNB-18-CB4.13	382.876	4113.46	1.87507	21.5986	2.44629	0.146769	3.69859	0.023001	2.77403	146.594	4.02067	139.055	4.80647	12.1912	58.8139	146.594	4.02067
SNB-18-CB4 Spot 13	515.786	27091.5	1.04074	20.1933	2.80836	0.157431	4.15974	0.0230667	3.06863	147.009	4.46011	148.452	5.74509	171.551	65.5601	147.009	4.46011
SNB-18-CB4.17	281.32	2754.68	1.3759	22.5991	2.59276	0.140952	3.4847	0.0231128	2.32825	147.299	3.3906	133.892	4.37122	NA	NA	147.299	3.3906
SNB-18-CB4 Spot 15	468.565	6078.53	1.25348	17.5065	4.97524	0.182566	6.31749	0.0231904	3.89329	147.788	5.68835	170.266	9.90336	495.246	109.71	147.788	5.68835
SNB-18-CB4 Spot 19	821.279	641504	0.891845	20.2329	1.56184	0.158488	2.91995	0.0232671	2.46714	148.271	3.6163	149.379	4.05614	166.973	36.4857	148.271	3.6163
SNB-18-CB4.6	543.533	6483.93	1.82445	21.4212	1.97541	0.1503	3.3391	0.023361	2.69209	148.862	3.96159	142.177	4.43007	32.0003	47.3096	148.862	3.96159
SNB-18-CB4 Spot 14	466.208	108653	1.37959	19.9539	2.34211	0.16191	3.87951	0.0234417	3.09276	149.371	4.56658	152.373	5.48924	199.332	54.4029	149.371	4.56658
SNB-18-CB4.16	491.408	15539	1.37992	20.3203	2.07454	0.159074	2.94056	0.023454	2.08403	149.448	3.07872	149.892	4.09778	156.919	48.5555	149.448	3.07872
SNB-18-CB4 Spot 10	275.148	19007.6	1.35121	19.8747	3.88994	0.163694	6.31012	0.023606	4.9685	150.406	7.38641	153.932	9.01308	208.574	90.2445	150.406	7.38641
SNB-18-CB4 Spot 18	218.337	12636.3	1.33115	17.2005	4.91128	0.190834	6.62969	0.0238169	4.45333	151.733	6.67829	177.341	10.7881	534.005	107.604	151.733	6.67829
SNB-18-CB4.8	361.366	4832.4	1.20369	9.25029	7.37901	0.358122	8.03431	0.0240366	3.17811	153.117	4.8089	310.811	21.5147	1766.91	134.987	153.117	4.8089	d
SNB-18-CB4 Spot 5	1713.96	1.32567e+06	1.05604	20.4405	1.12881	0.162495	3.31794	0.0241002	3.12002	153.517	4.73318	152.885	4.70924	143.108	26.4684	153.517	4.73318
SNB-18-CB4 Spot 1	276.556	12939.3	1.72551	19.1762	3.75288	0.173921	5.73266	0.0241992	4.33351	154.14	6.60046	162.816	8.62401	290.935	85.7478	154.14	6.60046
SNB-18-CB4 Spot 4	1528	153862	1.13416	19.4048	2.04679	0.173267	3.60345	0.0243957	2.96573	155.377	4.55297	162.25	5.40346	263.793	46.9842	155.377	4.55297
SNB-18-CB4 Spot 8	231.217	99548.3	1.34604	19.5883	3.81611	0.17249	5.60219	0.024516	4.10145	156.134	6.32682	161.577	8.36859	242.097	87.9592	156.134	6.32682
SNB-18-CB4 Spot 7	822.958	177631	0.946426	20.3452	2.27565	0.167399	3.38997	0.0247116	2.51263	157.365	3.90612	157.159	4.93584	154.033	53.2898	157.365	3.90612	o
SNB-18-CB4.5	525.889	10959.8	1.55316	20.3785	1.79511	0.174386	3.02321	0.0257852	2.43256	164.115	3.94182	163.218	4.55829	150.203	42.0724	164.115	3.94182	o
SNB-18-CB4 Spot 12	1812.38	483423	1.04969	20.2383	1.18372	0.176546	2.72691	0.025925	2.45659	164.994	4.00179	165.084	4.15481	166.356	27.6593	164.994	4.00179	o
SNB-18-CB4 Spot 6	113.184	7128	2.276	6.81248	14.7769	0.536002	15.8535	0.0264947	5.74237	168.572	9.55459	435.785	56.2306	2308.09	255.2	168.572	9.55459	o,d
SNB-18-CB4.9	481.84	4044.83	1.22812	21.6021	3.01842	0.182904	3.72108	0.0286687	2.17615	182.211	3.90965	170.557	5.84223	11.7756	72.6076	182.211	3.90965	o
Tungsten Hills diorite				Isotope Ratios						Apparent Ages (Ma)
Analysis	U (ppm)	206Pb/ 204Pb	U/Th	206Pb/ 207Pb	± (%)	207Pb/ 235U	± (%)	206Pb/ 238U	± (%)	206Pb/ 238U	±	207Pb/ 235U	±	206Pb/ 207Pb	±	Best Age (Ma)	± (Ma)	ex?
SNB-19-34.3	108.896	7773.36	1.82232	18.1233	3.73016	0.165701	5.36219	0.0217896	3.85214	138.957	5.29553	155.681	7.73961	418.436	83.3235	138.957	5.29553
SNB-19-34.23	124.413	12040.5	1.87164	19.1042	3.33253	0.16247	4.80302	0.0225211	3.45879	143.57	4.91088	152.863	6.8162	299.476	76.0072	143.57	4.91088
SNB-19-34.11	251.601	4400.42	1.47438	21.2238	3.54232	0.146868	5.12427	0.0226172	3.70271	144.175	5.27915	139.143	6.66319	54.1276	84.5349	144.175	5.27915
SNB-19-34.12	286.108	11337.4	1.29252	19.8437	2.35316	0.157541	3.72941	0.0226831	2.89329	144.591	4.13688	148.548	5.15384	212.172	54.5221	144.591	4.13688
SNB-19-34 Spot 111	218.897	4073.41	2.30273	22.5087	4.65691	0.139102	5.88622	0.0227181	3.60011	144.812	5.15526	132.244	7.2987	NA	NA	144.812	5.15526	d
SNB-19-34.10	157.981	2080.9	1.74665	22.2798	8.82337	0.140954	9.244	0.0227865	2.75674	145.243	3.95919	133.893	11.5963	NA	NA	145.243	3.95919
SNB-19-34 Spot 106	689.238	18893.1	0.972163	20.2404	2.30484	0.156132	3.63203	0.0229296	2.80703	146.145	4.05616	147.311	4.98043	166.116	53.8774	146.145	4.05616
SNB-19-34 Spot 118	594.958	31884.7	2.31182	20.5002	2.45365	0.154229	3.95165	0.022941	3.09761	146.216	4.47823	145.639	5.36151	136.227	57.6813	146.216	4.47823
SNB-19-34 Spot 109	151.005	11680.8	2.2365	21.621	4.02578	0.146236	6.39567	0.0229414	4.96967	146.219	7.1848	138.583	8.28527	9.69352	96.8927	146.219	7.1848
SNB-19-34.4	547.156	6811.61	0.99652	20.3359	1.78239	0.155563	3.13311	0.0229539	2.57672	146.298	3.72723	146.812	4.28273	155.148	41.7348	146.298	3.72723
SNB-19-34.17	309.939	9264.29	2.52782	19.4864	2.34759	0.16249	4.25319	0.0229745	3.54661	146.427	5.13467	152.88	6.03651	254.108	54.003	146.427	5.13467
SNB-19-34.5	237.69	8785.49	1.79058	19.6281	2.37639	0.162758	3.92244	0.0231797	3.12063	147.72	4.55738	153.114	5.57498	237.472	54.8319	147.72	4.55738
SNB-19-34.9	252.2	5690.78	1.99079	20.3018	2.2785	0.157381	3.65416	0.0231832	2.8568	147.743	4.17271	148.408	5.04541	159.029	53.3177	147.743	4.17271
SNB-19-34 Spot 124	275.723	6405.59	1.39854	20.8	3.69236	0.154005	5.03284	0.0232427	3.41994	148.117	5.00777	145.442	6.81989	102.02	87.3575	148.117	5.00777
SNB-19-34 Spot 115	431.268	74698.1	1.82839	19.7956	2.85623	0.161823	4.7147	0.0232432	3.75105	148.12	5.49272	152.297	6.66791	217.835	66.1157	148.12	5.49272
SNB-19-34.6	629.301	12480.9	1.36667	19.9808	1.4006	0.160544	2.66055	0.0232752	2.26205	148.322	3.31681	151.179	3.7371	196.24	32.55	148.322	3.31681
SNB-19-34 Spot 108	100.787	9080.41	2.16331	18.351	4.78173	0.175376	7.55201	0.0233516	5.84534	148.804	8.59846	164.074	11.4421	390.479	107.385	148.804	8.59846
SNB-19-34 Spot 121	500.535	16956.4	0.992794	20.1308	2.62616	0.160335	3.86649	0.0234194	2.83779	149.231	4.1862	150.996	5.42494	178.782	61.2108	149.231	4.1862
SNB-19-34 Spot 116	629.096	185831	0.981293	20.0933	2.24847	0.160668	3.65009	0.0234244	2.87533	149.262	4.24248	151.288	5.1305	183.129	52.3923	149.262	4.24248
SNB-19-34 Spot 123	186.057	239489	2.24806	19.4579	4.58233	0.167282	5.88222	0.0236174	3.68819	150.477	5.48562	157.057	8.55962	257.481	105.336	150.477	5.48562
SNB-19-34 Spot 114	536.414	30298.8	1.20961	20.25	2.84045	0.161672	3.83791	0.0237546	2.58097	151.341	3.86059	152.165	5.4235	164.999	66.3898	151.341	3.86059
SNB-19-34.13	264.176	1607.76	2.01332	23.9394	6.2245	0.137216	6.66674	0.0238346	2.38767	151.845	3.5832	130.562	8.16799	NA	NA	151.845	3.5832
SNB-19-34 Spot 125	310.303	15190.9	1.16417	20.1746	3.27547	0.16401	4.952	0.0240083	3.71397	152.939	5.61326	154.207	7.08485	173.718	76.426	152.939	5.61326
SNB-19-34 Spot 122	458.409	90284.3	1.31358	20.6253	2.33219	0.160547	3.87668	0.0240264	3.09669	153.053	4.68376	151.182	5.44543	121.923	54.9273	153.053	4.68376
SNB-19-34.15	139.243	31808.8	2.2631	13.8659	4.2973	0.241478	5.77035	0.0242948	3.85099	154.742	5.88815	219.63	11.397	988.449	87.4702	154.742	5.88815
SNB-19-34.16	518.943	43000.3	1.08977	19.3196	1.65244	0.174381	3.6125	0.0244447	3.21242	155.685	4.94135	163.214	5.44667	273.843	37.8652	155.685	4.94135
SNB-19-34 Spot 107	146.125	8079.96	1.8368	20.4057	3.47464	0.167035	5.48811	0.0247313	4.24809	157.488	6.60918	156.843	7.976	147.074	81.4889	157.488	6.60918
SNB-19-34 Spot 112	156.538	12358.8	1.37	20.5967	4.53113	0.166999	5.67873	0.0249574	3.42299	158.911	5.37301	156.811	8.25153	125.182	106.743	158.911	5.37301
SNB-19-34 Spot 117	1012.37	53906.7	0.635261	20.5032	1.53762	0.173213	3.8931	0.0257686	3.57658	164.011	5.792	162.204	5.83626	135.908	36.1233	164.011	5.792	o
SNB-19-34 Spot 120	941.13	61474.7	0.526706	19.7545	1.40416	0.188834	5.2454	0.0270666	5.05396	172.163	8.58588	175.634	8.46014	222.621	32.4707	172.163	8.58588	o
SNB-19-34.8	1896.68	66536.5	0.573068	20.3363	0.859883	0.368469	5.18739	0.0543702	5.11562	341.296	17.0053	318.518	14.1832	155.1	20.1201	341.296	17.0053	o
Mount Tom gabbro				Isotope Ratios						Apparent Ages (Ma)
Analysis	U (ppm)	206Pb/ 204Pb	U/Th	206Pb/ 207Pb	± (%)	207Pb/ 235U	± (%)	206Pb/ 238U	± (%)	206Pb/ 238U	±	207Pb/ 235U	±	206Pb/ 207Pb	±	Best Age (Ma)	± (Ma)	ex?
SNB-19-16.11	370.469	37505.9	1.10086	18.0772	3.33273	0.15378	5.43005	0.0201707	4.287	128.734	5.46411	145.244	7.34884	424.115	74.377	128.734	5.46411	o,d
SNB-19-16.25	325.4	6083.78	1.94159	20.2748	2.22171	0.142451	3.37597	0.020956	2.54188	133.695	3.36337	135.224	4.27423	162.143	51.9525	133.695	3.36337	o
SNB-19-16.13	178.172	6001.41	2.21113	21.0728	3.02794	0.137456	4.94347	0.0210171	3.90761	134.081	5.18525	130.775	6.0659	71.1493	72.0169	134.081	5.18525	o
SNB-19-16.11	286.634	10117.5	1.38946	19.6082	2.3688	0.152879	3.73365	0.0217508	2.88598	138.711	3.96042	144.451	5.02725	239.761	54.6421	138.711	3.96042	o
SNB-19-16.3	603.109	18949.6	1.70461	19.7463	1.70239	0.154841	2.66427	0.022185	2.04944	141.451	2.86737	146.177	3.62722	223.554	39.3838	141.451	2.86737
SNB-19-16.20	554.583	30931.6	1.4099	18.9499	1.83235	0.162135	3.00662	0.0222932	2.38375	142.133	3.351	152.57	4.25923	317.935	41.636	142.133	3.351
SNB-19-16.20	233.979	6149.25	1.33592	20.1277	3.7343	0.154468	5.01606	0.022559	3.34902	143.809	4.76286	145.849	6.81485	179.143	87.0662	143.809	4.76286
SNB-19-16.15	189.478	10877.1	1.50501	12.5138	4.68836	0.248647	5.56415	0.0225767	2.99651	143.92	4.2648	225.476	11.251	1193.93	92.5366	143.92	4.2648
SNB-19-16.9	448.973	15252.3	1.18748	19.4858	1.91226	0.159685	2.75542	0.0225771	1.98383	143.923	2.82355	150.427	3.8525	254.227	43.9623	143.923	2.82355
SNB-19-16.22	370.378	4603.52	1.11216	20.6733	2.17683	0.151439	3.81735	0.0227163	3.13585	144.8	4.4901	143.182	5.09792	116.459	51.3386	144.8	4.4901
SNB-19-16.16	560.238	4686.19	1.173	21.3023	2.32122	0.147102	3.14891	0.0227369	2.12781	144.93	3.04943	139.35	4.10023	45.329	55.4605	144.93	3.04943
SNB-19-16.13	354.433	5611.71	1.61621	18.8532	3.97236	0.166358	4.91205	0.022757	2.88938	145.057	4.14445	156.253	7.11396	329.561	90.1494	145.057	4.14445
SNB-19-16.6	330.367	6238.32	1.27672	20.4163	3.26865	0.153758	4.65542	0.0227773	3.31494	145.185	4.759	145.225	6.29966	145.897	76.6847	145.185	4.759
SNB-19-16.6	426.151	15455.8	1.39743	19.4018	1.72843	0.162056	3.11277	0.0228136	2.5888	145.414	3.72232	152.501	4.40775	264.122	39.6657	145.414	3.72232
SNB-19-16.26	471.792	7986.95	1.94921	20.2187	1.91141	0.155512	2.97694	0.0228142	2.28225	145.417	3.28164	146.767	4.0681	168.615	44.6699	145.417	3.28164
SNB-19-16.4	502.334	14987.3	1.69793	19.3723	2.62728	0.162365	3.41199	0.0228223	2.17694	145.468	3.1313	152.771	4.83938	267.602	60.2771	145.468	3.1313
SNB-19-16.10	318.654	4031.15	1.08191	21.5348	4.26697	0.146896	5.19774	0.022953	2.96807	146.292	4.29315	139.168	6.75986	19.3238	102.493	146.292	4.29315
SNB-19-16.21	465.72	28584.2	1.59279	20.4353	1.90269	0.155596	2.94537	0.023071	2.24833	147.036	3.26843	146.841	4.02684	143.711	44.6288	147.036	3.26843
SNB-19-16.2	250.719	3461.3	1.37847	21.4159	3.1471	0.148659	4.46632	0.0231001	3.1692	147.219	4.61279	140.727	5.86927	32.5822	75.4046	147.219	4.61279
SNB-19-16.5	336.852	4459.57	2.04101	21.1346	3.06385	0.152277	4.55547	0.0233516	3.37122	148.804	4.95904	143.921	6.11289	64.1714	72.9683	148.804	4.95904
SNB-19-16.2	666.441	22211.1	1.23439	20.2206	1.65867	0.159968	3.42528	0.02347	2.99688	149.549	4.43024	150.675	4.79639	168.396	38.738	149.549	4.43024
SNB-19-16.14	156.679	1913.21	1.89189	21.207	4.90485	0.153584	6.64845	0.0236326	4.48825	150.574	6.6798	145.071	8.98789	55.996	117.02	150.574	6.6798
SNB-19-16.12	184.244	2122.54	2.39204	22.497	5.59716	0.145815	6.44281	0.023802	3.19085	151.64	4.78214	138.21	8.32533	NA	NA	151.64	4.78214
SNB-19-16.18	219.451	22961.2	2.11745	19.2068	3.15764	0.172314	4.49996	0.024014	3.20608	152.975	4.84675	161.425	6.71617	287.245	72.1839	152.975	4.84675
Shannon Canyon diorite				Isotope Ratios						Apparent Ages (Ma)
Analysis	U (ppm)	206Pb/ 204Pb	U/Th	206Pb/ 207Pb	± (%)	207Pb/ 235U	± (%)	206Pb/ 238U	± (%)	206Pb/ 238U	±	207Pb/ 235U	±	206Pb/ 207Pb	±	Best Age (Ma)	± (Ma)	ex?
SNB-19-52.15	227.217	2685.38	2.07277	18.4738	4.02635	0.188426	4.80117	0.0252571	2.61529	160.796	4.15325	175.285	7.72953	375.495	90.6286	160.796	4.15325
SNB-19-52.18	203.711	2234.14	1.12035	21.4225	2.86231	0.165126	4.08741	0.0256669	2.91789	163.372	4.70711	155.18	5.882	31.842	68.5819	163.372	4.70711
SNB-19-52.11	376.815	7580.73	0.888715	19.557	1.60766	0.181199	2.45566	0.0257125	1.85626	163.659	2.99969	169.092	3.82501	245.81	37.0485	163.659	2.99969
SNB-19-52.16	337.936	5997.18	0.908731	20.3832	1.58353	0.174814	2.801	0.0258545	2.31041	164.55	3.75369	163.588	4.23206	149.662	37.1063	164.55	3.75369
SNB-19-52.7	345.921	34472	0.975087	19.2237	2.1493	0.186686	3.2004	0.0260398	2.3713	165.715	3.87952	173.798	5.11227	285.252	49.1577	165.715	3.87952
SNB-19-52.14	252.549	6747.18	1.20091	17.9542	2.91861	0.199893	3.75467	0.0260407	2.36203	165.721	3.86449	185.036	6.3513	439.329	64.9709	165.721	3.86449
SNB-19-52.5	237.619	5075.94	1.12158	19.9674	3.71413	0.180388	4.83351	0.0261345	3.09322	166.31	5.07855	168.394	7.50037	197.795	86.299	166.31	5.07855
SNB-19-52.13	98.9999	2508.59	1.95957	22.2419	4.35166	0.162009	6.93831	0.0261456	5.40399	166.38	8.87612	152.46	9.82261	NA	NA	166.38	8.87612
SNB-19-52 Spot 2	190.027	4920.89	1.47349	21.1101	4.1006	0.17102	5.55547	0.0261955	3.7481	166.693	6.16774	160.304	8.23841	66.891	97.6132	166.693	6.16774
SNB-19-52 Spot 22	389.982	5904.38	0.977364	18.0774	4.12141	0.200669	5.72828	0.0263211	3.97834	167.482	6.57721	185.692	9.72131	424.093	91.9802	167.482	6.57721
SNB-19-52 Spot 23	325.66	6743.8	1.04394	19.1656	3.30403	0.190117	5.38741	0.0264381	4.2553	168.217	7.06555	176.729	8.73878	292.15	75.4769	168.217	7.06555
SNB-19-52.6	279.244	2976.96	1.00971	21.1295	2.31934	0.173212	3.29164	0.0265555	2.33571	168.954	3.89502	162.203	4.93455	64.7523	55.2424	168.954	3.89502
SNB-19-52.9	276.716	5167.51	1.07295	20.1646	2.52287	0.181541	3.84364	0.0265614	2.89977	168.991	4.83668	169.385	5.99656	174.872	58.8734	168.991	4.83668
SNB-19-52.4	170.516	6356.65	1.21623	19.7724	3.46809	0.185186	5.25739	0.0265679	3.95126	169.032	6.59209	172.514	8.34127	220.499	80.2626	169.032	6.59209
SNB-19-52.17	276.92	14912.3	1.04761	19.4144	2.16716	0.188602	3.26823	0.026568	2.44637	169.033	4.08143	175.436	5.2657	262.626	49.7447	169.033	4.08143
SNB-19-52 Spot 21	278.641	17750.6	1.08471	17.3288	3.18129	0.212178	5.06412	0.0266782	3.94014	169.725	6.60013	195.379	9.00077	517.693	69.8678	169.725	6.60013
SNB-19-52 Spot 3	351.294	22745.9	0.973968	17.4382	3.33696	0.211408	4.74162	0.0267493	3.36863	170.171	5.65743	194.734	8.40229	503.866	73.4624	170.171	5.65743
SNB-19-52 Spot 6	196.759	10211	1.38291	18.8165	4.73568	0.196166	7.26721	0.0267825	5.51231	170.38	9.26884	181.877	12.1018	334.021	107.4	170.38	9.26884
SNB-19-52.3	258.571	2615.69	0.924278	22.5423	3.30536	0.16456	4.28861	0.026916	2.73255	171.217	4.61701	154.687	6.1534	NA	NA	171.217	4.61701
SNB-19-52 Spot 1	357.115	34639.8	1.00152	18.5371	3.01647	0.200327	4.85921	0.0269445	3.80958	171.396	6.44345	185.403	8.23466	367.786	67.9628	171.396	6.44345
SNB-19-52 Spot 24	388.093	4052.51	1.39502	20.9943	2.74523	0.177121	5.37884	0.0269811	4.62555	171.626	7.8339	165.58	8.21819	79.9682	65.2043	171.626	7.8339
SNB-19-52 Spot 5	223.337	2754.26	1.12812	14.4768	7.03025	0.258925	8.13854	0.0271979	4.10018	172.987	6.99846	233.8	16.9977	900.091	145.178	172.987	6.99846
SNB-19-52 Spot 13	205.743	29016.6	2.1586	19.6398	3.8358	0.192494	6.67656	0.027431	5.46471	174.45	9.40535	178.755	10.9436	236.076	88.5407	174.45	9.40535
SNB-19-52 Spot 14	215.175	9805.65	1.89394	20.4564	4.64186	0.184994	6.97437	0.0274583	5.20528	174.621	8.96751	172.348	11.0559	141.25	109.039	174.621	8.96751
SNB-19-52 Spot 16	327.705	25410.8	0.974565	20.2865	3.04147	0.186723	4.74405	0.0274848	3.64081	174.787	6.27816	173.829	7.57941	160.819	71.1327	174.787	6.27816
SNB-19-52 Spot 18	368.279	17044.9	0.888655	18.3386	3.5005	0.207052	5.68142	0.0275508	4.47493	175.201	7.73457	191.076	9.89588	391.996	78.5759	175.201	7.73457
SNB-19-52 Spot 19	208.725	3167.32	1.44226	15.6529	4.85889	0.24417	7.23035	0.0277315	5.35435	176.335	9.31363	221.829	14.4089	736.921	102.901	176.335	9.31363
SNB-19-52.10	128.205	1990.53	1.21254	23.6372	8.60435	0.161934	9.29964	0.0277729	3.52824	176.595	6.14611	152.395	13.1606	NA	NA	176.595	6.14611
SNB-19-52 Spot 20	235.055	12316.3	1.0352	20.6647	3.52081	0.185492	4.73596	0.0278127	3.16753	176.844	5.52545	172.776	7.52442	117.449	83.0599	176.844	5.52545
SNB-19-52.8	248.61	10445.4	0.962828	18.9499	2.04006	0.203309	3.66782	0.0279544	3.04812	177.733	5.34351	187.922	6.29249	317.946	46.3813	177.733	5.34351
SNB-19-52 Spot 10	387.465	25563.4	0.923369	19.6026	3.04101	0.197583	5.0292	0.028103	4.00564	178.665	7.05841	183.079	8.42527	240.426	70.1376	178.665	7.05841
SNB-19-52 Spot 9	147.113	4160.46	2.15008	15.243	6.17031	0.255676	7.74055	0.0282779	4.67369	179.761	8.28542	231.176	16.0048	792.834	129.537	179.761	8.28542
SNB-19-52 Spot 11	240.086	2911.63	1.0679	12.504	8.47051	0.312719	9.66087	0.0283721	4.64573	180.352	8.26254	276.286	23.3725	1195.5	167.385	180.352	8.26254	d
SNB-19-52 Spot 25	185.41	2673.8	1.22777	15.6964	6.00677	0.251954	7.57738	0.0286951	4.61902	182.376	8.30595	228.162	15.4851	731.083	127.392	182.376	8.30595
SNB-19-52 Spot 7	131.014	5439.55	2.06159	15.5343	6.18118	0.256207	8.43834	0.0288781	5.74445	183.523	10.3937	231.605	17.4767	752.997	130.626	183.523	10.3937
SNB-19-52.2	298.157	5849.64	2.46667	22.1293	2.36015	0.25392	3.6644	0.0407711	2.80314	257.611	7.07881	229.755	7.53474	NA	NA	257.611	7.07881	o
Pine Creek diorite				Isotope Ratios						Apparent Ages (Ma)
Analysis	U (ppm)	206Pb/ 204Pb	U/Th	206Pb/ 207Pb	± (%)	207Pb/ 235U	± (%)	206Pb/ 238U	± (%)	206Pb/ 238U	±	207Pb/ 235U	±	206Pb/ 207Pb	±	Best Age (Ma)	± (Ma)	ex?
SNB-19-60 Spot 42	1183.88	8562.74	10.2076	20.6847	2.4074	0.113724	3.45973	0.0170683	2.48479	109.101	2.68812	109.366	3.58715	115.173	56.7707	109.101	2.68812	o
SNB-19-60 Spot 57	1038.51	4372.03	4.43218	15.7669	3.75726	0.1747	5.03491	0.019986	3.35162	127.568	4.23355	163.49	7.6032	721.541	79.7346	127.568	4.23355	o
SNB-19-60 Spot 52	1017.45	18240.6	2.68761	16.9295	4.86577	0.179095	6.16625	0.0219996	3.78774	140.281	5.25608	167.281	9.51038	568.696	105.949	140.281	5.25608	o
SNB-19-60 Spot 60	1068.59	17668.5	5.47086	18.5557	2.61117	0.176075	4.07276	0.0237061	3.12556	151.036	4.66586	164.677	6.19135	365.532	58.8611	151.036	4.66586	o
SNB-19-60 Spot 54	1133.05	16642.4	1.81919	19.7669	2.02342	0.184769	4.6028	0.0265005	4.1342	168.609	6.88025	172.156	7.28877	221.149	46.8124	168.609	6.88025	o
SNB-19-60 Spot 59	571.464	27259.2	2.08373	19.1302	2.23776	0.203848	4.66531	0.0282953	4.09359	179.87	7.26138	188.377	8.02145	296.41	51.0599	179.87	7.26138
SNB-19-60 Spot 37	1263.39	6610.73	1.24334	15.7093	5.57591	0.250731	6.11797	0.0285794	2.5177	181.651	4.50958	227.17	12.4538	729.334	118.26	181.651	4.50958	o
SNB-19-60 Spot 48	518.682	8666.42	2.32881	20.6965	3.30923	0.190438	5.32565	0.0285982	4.17272	181.769	7.47877	177.003	8.65087	113.825	78.1197	181.769	7.47877
SNB-19-60 Spot 41	627.871	5967.91	1.51003	15.0661	4.83354	0.265051	5.5572	0.0289746	2.74215	184.127	4.97763	238.729	11.823	817.313	101.072	184.127	4.97763	d
SNB-19-60 Spot 46	908.311	28574.2	1.18068	17.7052	2.26573	0.23142	3.6734	0.0297297	2.89142	188.856	5.38142	211.37	7.0097	470.362	50.1553	188.856	5.38142
SNB-19-60 Spot 36	1124.05	19082.2	1.45956	20.8408	1.99914	0.199003	3.23773	0.0300926	2.54683	191.128	4.79625	184.282	5.45649	97.3715	47.3086	191.128	4.79625
SNB-19-60 Spot 39	1424.07	350230	1.66587	20.2536	2.06004	0.205149	3.54178	0.0301481	2.88105	191.475	5.43538	189.474	6.12189	164.584	48.165	191.475	5.43538
SNB-19-60 Spot 40	1161.74	39248.4	1.49798	20.0641	1.86798	0.207144	3.52204	0.0301565	2.98587	191.527	5.63464	191.154	6.13682	186.515	43.4837	191.527	5.63464
SNB-19-60 Spot 50	1093.88	12151.2	1.42865	19.8116	1.89082	0.211728	3.19528	0.0304357	2.57577	193.275	4.90442	195.001	5.66912	215.968	43.8082	193.275	4.90442
SNB-19-60 Spot 44	754.909	29360.5	1.36069	19.6666	2.36702	0.213356	3.9249	0.0304455	3.13082	193.336	5.96313	196.365	7.0078	232.942	54.6555	193.336	5.96313
SNB-19-60 Spot 49	1488.58	30109.8	1.29899	19.8709	1.76636	0.211588	3.12097	0.0305069	2.57302	193.72	4.9103	194.885	5.53428	209.02	40.955	193.72	4.9103
SNB-19-60 Spot 43	873.933	57793.5	1.54531	19.7871	2.33834	0.214252	3.82914	0.0307605	3.03225	195.306	5.83335	197.114	6.86046	218.829	54.1225	195.306	5.83335
SNB-19-60 Spot 58	687.872	356565	1.26416	19.6787	2.38891	0.21564	4.06177	0.0307903	3.28498	195.493	6.3255	198.275	7.31606	231.48	55.188	195.493	6.3255
SNB-19-60 Spot 56	1274.58	29818.3	1.3063	19.3237	1.70043	0.219673	2.82607	0.0308002	2.25725	195.555	4.34788	201.637	5.16832	273.359	38.9558	195.555	4.34788
SNB-19-60 Spot 47	385.902	9301.47	1.95424	18.4509	3.11362	0.232915	5.30678	0.031182	4.29735	197.942	8.377	212.602	10.1798	378.275	70.0335	197.942	8.377
SNB-19-60 Spot 53	857.339	6444.62	1.68935	13.6242	5.94391	0.315508	6.89843	0.0311896	3.50117	197.989	6.82658	278.441	16.801	1024.08	120.38	197.989	6.82658	d
SNB-19-60 Spot 55	1079.99	21394.5	1.35125	20.151	1.96401	0.213812	3.40852	0.0312619	2.78579	198.441	5.44394	196.746	6.0965	176.446	45.7932	198.441	5.44394
SNB-19-60 Spot 51	804.682	11368.9	1.32272	20.0172	2.38451	0.215667	3.44554	0.0313239	2.48714	198.829	4.86966	198.297	6.20672	192.006	55.4528	198.829	4.86966
SNB-19-60 Spot 45	2029.04	43201.2	1.26565	20.2742	1.40972	0.213975	3.10674	0.0314772	2.76849	199.787	5.44625	196.883	5.56024	162.25	32.9782	199.787	5.44625
SNB-19-60 Spot 38	1472.55	33042.1	1.5198	19.4405	1.84882	0.225312	2.96753	0.0317818	2.32122	201.69	4.6092	206.321	5.54073	259.535	42.4804	201.69	4.6092
R33, secondary standard
expected age 419 Ma, Black et al., (2004)				Isotope Ratios						Apparent Ages (Ma)						Best Age
Analysis	U (ppm)	206Pb/ 204Pb	U/Th	206Pb/ 207Pb	± (%)	207Pb/ 235U	± (%)	206Pb/ 238U	± (%)	206Pb/ 238U	±	207Pb/ 235U	±	206Pb/ 207Pb	±	Best Age (Ma)	± (Ma)
A R33 21	481.882	24012.1	1.27924	17.918	1.28645	0.493621	2.51278	0.064176	2.1585	400.972	8.3913	407.375	8.43233	443.815	28.6263	400.972	8.3913
A R33 58	146.386	3663.75	1.65317	18.4579	2.40018	0.488856	4.83059	0.0654714	4.1921	408.814	16.6058	404.131	16.1063	377.425	53.985	408.814	16.6058
A R33 81	230.801	4310.29	1.32089	18.6004	1.41561	0.500324	3.35367	0.0675247	3.04025	421.225	12.3969	411.922	11.3562	360.097	31.9334	421.225	12.3969
A R33 96	467.359	10394.6	1.14251	18.1545	1.73529	0.502735	3.1784	0.0662232	2.6629	413.361	10.6619	413.552	10.7972	414.593	38.8055	413.361	10.6619
A R33 111	243.131	7989.34	1.63495	18.0634	2.35564	0.495999	4.26708	0.0650082	3.55794	406.011	14.0001	408.991	14.3661	425.824	52.5497	406.011	14.0001
A R33 140	142.725	11333.8	1.65724	17.8875	2.41682	0.522461	4.99998	0.0678095	4.37707	422.945	17.9184	426.794	17.424	447.611	53.7197	422.945	17.9184
A R33 175	321.073	8476.54	1.20343	18.3351	2.21299	0.501668	3.49868	0.0667403	2.70988	416.487	10.9294	412.831	11.8685	392.422	49.6537	416.487	10.9294
A R33 225	337.821	8796.49	1.31518	17.3685	1.85011	0.528164	3.42119	0.0665608	2.87778	415.402	11.5773	430.59	12.0067	512.688	40.6546	415.402	11.5773
A R33 247	237.757	14678.7	1.37208	18.2137	1.92987	0.493944	3.68859	0.0652774	3.14346	407.641	12.4173	407.594	12.3838	407.311	43.1889	407.641	12.4173
A R33 259	233.993	26575.9	1.36455	17.3604	2.12218	0.516057	3.67022	0.0650047	2.99448	405.99	11.7824	422.514	12.6861	513.692	46.6181	405.99	11.7824
B R33 14	117.754	4978.42	2.94355	18.6734	2.44203	0.489511	6.98083	0.0663245	6.53977	413.974	26.2221	404.577	23.2987	351.288	55.1809	413.974	26.2221
B R33 29	285.832	19528.6	1.45835	17.4822	1.53451	0.522389	3.10414	0.0662639	2.69832	413.607	10.81	426.746	10.8157	498.317	33.8022	413.607	10.81
B R33 51	294.875	7913.51	1.50757	18.2558	1.38236	0.49187	3.93086	0.0651536	3.67978	406.891	14.51	406.184	13.1602	402.145	30.9633	406.891	14.51
B R33 73	365.714	12042.6	2.73099	17.9055	1.2078	0.497732	2.72015	0.0646651	2.4373	403.934	9.543	410.166	9.17903	445.375	26.8513	403.934	9.543
B R33 95	450.291	13664.3	2.41716	18.3062	1.57067	0.485246	3.42217	0.0644537	3.04044	402.654	11.8679	401.666	11.3531	395.965	35.2193	402.654	11.8679
B R33 117	120.964	20552.4	1.70661	17.9962	1.92156	0.531262	4.70911	0.0693711	4.29922	432.366	17.9788	432.647	16.5908	434.125	42.8023	432.366	17.9788
B R33 161	322.675	18573	1.39444	17.8022	1.62655	0.507213	2.73671	0.0655166	2.20089	409.088	8.72384	416.573	9.35162	458.243	36.1006	409.088	8.72384
C R33 33	177.363	29575.2	1.69739	18.0728	2.38011	0.501896	4.99243	0.0658153	4.38855	410.895	17.4697	412.985	16.9417	424.661	53.1058	410.895	17.4697
C R33 54	365.486	208107	1.78215	18.2139	1.57928	0.490399	4.51207	0.0648097	4.22667	404.81	16.5838	405.182	15.076	407.285	35.3415	404.81	16.5838
C R33 62	106.118	9143.46	1.51417	18.1777	3.47923	0.505526	7.82395	0.0666763	7.00779	416.1	28.2384	415.436	26.6816	411.73	77.8104	416.1	28.2384
C R33 90	48.556	4459.82	3.06934	19.6104	4.19349	0.501848	15.1419	0.0714078	14.5496	444.632	62.5136	412.953	51.4195	239.514	96.7225	444.632	62.5136
C R33 113	132.536	74821	1.69779	18.0893	2.38325	0.507845	5.0167	0.0666563	4.41445	415.98	17.7833	416.999	17.1579	422.62	53.1954	415.98	17.7833
C R33 126	166.391	13100.9	2.06641	18.0865	2.09044	0.530471	5.32438	0.0696153	4.89684	433.838	20.5453	432.122	18.7406	422.966	46.6759	433.838	20.5453
C R33 149	131.136	6216.73	1.8151	19.3271	2.77238	0.462118	5.52423	0.0648047	4.77818	404.779	18.7464	385.73	17.7303	272.96	63.5546	404.779	18.7464
C R33 181	243.107	13386.8	1.63257	17.5999	1.70305	0.516929	3.42425	0.0660128	2.97071	412.089	11.8589	423.098	11.849	483.559	37.6111	412.089	11.8589
C R33 203	266.925	22857.4	1.85277	18.885	2.04991	0.498235	3.39331	0.0682714	2.70415	425.733	11.1405	410.507	11.4585	325.761	46.5192	425.733	11.1405
C R33 217	153.401	15438.5	1.52067	18.2055	1.86652	0.518242	4.82833	0.0684578	4.45297	426.858	18.3922	423.976	16.7362	408.317	41.7636	426.858	18.3922
D R33 4	139.179	8032.25	2.01292	18.2587	2.43713	0.497393	5.06079	0.0658956	4.43532	411.38	17.6761	409.936	17.0708	401.788	54.618	411.38	17.6761
D R33 36	229.32	2409.98	2.07654	12.8218	8.20744	0.745135	9.68733	0.0693223	5.14609	432.072	21.5061	565.398	42.0231	1145.8	163.348	432.072	21.5061
D R33 58	152.766	3402.36	1.49083	19.7135	4.71112	0.463657	6.33427	0.0663207	4.23419	413.951	16.9766	386.798	20.3771	227.438	108.911	413.951	16.9766
D R33 66	124.054	5148.38	2.14022	18.6683	2.2676	0.495713	4.57892	0.0671465	3.97801	418.942	16.1356	408.797	15.4102	351.898	51.2241	418.942	16.1356
D R33 74	368.247	7525.9	1.51304	18.2903	1.6113	0.495244	3.5187	0.0657247	3.12809	410.347	12.436	408.478	11.8342	397.906	36.1183	410.347	12.436
D R33 101	124.833	2607.37	2.26181	19.5841	6.04776	0.453159	8.28261	0.0643934	5.65917	402.289	22.0705	379.489	26.232	242.6	139.47	402.289	22.0705
D R33 109	113.675	1534.48	2.11927	15.1736	5.78234	0.594279	8.94183	0.0654283	6.82062	408.554	27.0014	473.596	33.8566	802.397	121.184	408.554	27.0014
D R33 124	229	27840.7	1.48276	17.8323	1.82279	0.525727	4.38155	0.068023	3.9844	424.234	16.359	428.97	15.3311	454.485	40.4747	424.234	16.359
D R33 126	179.114	3334.17	2.57674	19.4869	1.90141	0.467901	4.49838	0.0661583	4.07677	412.969	16.3079	389.738	14.5604	254.06	43.709	412.969	16.3079
D R33 139	107.848	4358.76	2.70828	18.8854	3.87099	0.491458	6.63214	0.0673442	5.38523	420.135	21.9038	405.903	22.1936	325.729	87.9076	420.135	21.9038
D R33 152	138.891	27444.4	1.51074	17.2853	2.12447	0.531246	4.98829	0.0666285	4.51328	415.812	18.1743	432.636	17.5742	523.21	46.6191	415.812	18.1743
D R33 158	151.436	13342.1	1.6493	17.4836	1.84023	0.529112	3.7832	0.0671221	3.30547	418.794	13.4031	431.22	13.293	498.141	40.5302	418.794	13.4031
D R33 180	329.625	35105.9	1.4018	17.3562	1.32662	0.541435	2.70848	0.068185	2.36135	425.212	9.71676	439.371	9.6603	514.224	29.1542	425.212	9.71676
D R33 201	162.06	6846.63	1.89093	18.1328	2.97808	0.491291	5.80601	0.0646386	4.98406	403.774	19.5071	405.79	19.4239	417.26	66.5592	403.774	19.5071
D R33 223	244.896	8373.9	1.52224	18.6057	1.89174	0.483569	3.252	0.0652819	2.64515	407.668	10.4495	400.519	10.7634	359.455	42.6929	407.668	10.4495
D R33 239	396.938	73287.2	1.4341	18.0675	1.40476	0.499744	3.03576	0.0655138	2.69119	409.071	10.6669	411.529	10.2717	425.315	31.3594	409.071	10.6669
E R33 80	113.981	2604.67	2.37719	19.8053	3.20997	0.454962	5.44371	0.06538	4.3966	408.261	17.3931	380.748	17.2858	216.694	74.3398	408.261	17.3931
E R33 100	305.162	11360.1	1.37036	17.8089	1.60875	0.5013	3.55353	0.0647772	3.16852	404.613	12.4262	412.582	12.0487	457.404	35.7027	404.613	12.4262
E R33 122	244.587	10125.4	1.46682	18.0765	1.66182	0.505386	3.96134	0.0662867	3.59591	413.745	14.4106	415.342	13.5043	424.201	37.0805	413.745	14.4106
E R33 144	469.45	16245.2	1.40553	18.2184	1.29805	0.483026	2.61184	0.063851	2.26644	399.003	8.76899	400.147	8.6379	406.735	29.0513	399.003	8.76899
E R33 166	255.869	7427.7	2.34013	18.2201	1.92739	0.507167	3.85985	0.0670485	3.34419	418.349	13.5461	416.542	13.1891	406.525	43.1393	418.349	13.5461
E R33 188	441.021	39149.9	1.14303	17.9131	1.19354	0.517913	2.58253	0.0673154	2.29017	419.961	9.31126	423.756	8.94738	444.435	26.5513	419.961	9.31126
F R33 4	306.228	43137.9	1.0718	18.0725	1.68432	0.49808	4.03147	0.065314	3.66276	407.862	14.4763	410.402	13.6108	424.694	37.6004	407.862	14.4763
F R33 22	135.366	20562.6	1.30048	18.0315	2.08876	0.517407	5.19616	0.0676943	4.75785	422.249	19.4462	423.418	17.9923	429.761	46.5624	422.249	19.4462
F R33 46	264.885	129308	1.32684	18.0003	1.69473	0.502614	3.96968	0.0656451	3.58974	409.865	14.2551	413.47	13.4833	433.622	37.7641	409.865	14.2551
F R33 54	107.682	5303.18	1.52773	18.531	3.84928	0.501633	6.59012	0.0674485	5.34908	420.765	21.7883	412.807	22.3571	368.533	86.7418	420.765	21.7883
F R33 61	279.793	22717.4	1.12948	17.9841	1.77202	0.524906	3.75362	0.0684947	3.30902	427.08	13.6742	428.423	13.1203	435.632	39.4709	427.08	13.6742
F R33 77	175.006	55017.3	2.34633	18.0702	2.74609	0.497962	4.78237	0.0652902	3.91535	407.718	15.4693	410.322	16.1438	424.978	61.2786	407.718	15.4693
F R33 90	274.822	30313	1.06825	17.5852	2.46822	0.530524	4.06327	0.0676926	3.2277	422.239	13.1919	432.158	14.3021	485.371	54.5104	422.239	13.1919
F R33 105	212.777	25091.5	1.31757	18.2709	2.50574	0.508111	6.1045	0.0673606	5.56652	420.234	22.6463	417.178	20.8865	400.291	56.1525	420.234	22.6463
F R33 119	174.112	15464.2	2.32628	18.4981	2.27511	0.525051	4.93939	0.0704722	4.38423	439	18.6061	428.52	17.2688	372.526	51.2073	439	18.6061
F R33 122	312.397	120110	1.13152	17.9177	1.36519	0.496628	3.03761	0.0645657	2.71355	403.332	10.6093	409.418	10.2351	443.857	30.3567	403.332	10.6093
G-H R33 14	416.531	14027.3	1.38559	18.3643	1.53798	0.495527	2.64781	0.0660281	2.15534	412.182	8.60585	408.67	8.90841	388.856	34.5187	412.182	8.60585
G-H R33 36	202.121	4331.94	1.40229	18.6825	1.86287	0.48563	4.10032	0.0658306	3.65272	410.988	14.5437	401.928	13.6103	350.16	42.0889	410.988	14.5437
G-H R33 58	196.806	5986	1.40854	18.28	1.65508	0.503567	3.92867	0.0667915	3.56302	416.796	14.3807	414.114	13.3609	399.174	37.0918	416.796	14.3807
G-H R33 109	154.433	4274.69	1.72225	18.5991	2.87003	0.480102	4.34422	0.0647909	3.26116	404.696	12.792	398.143	14.3091	360.255	64.7585	404.696	12.792
G-H R33 138	337.018	8362.84	1.44781	18.1326	1.71107	0.494825	4.3459	0.0651028	3.99488	406.584	15.7409	408.193	14.6083	417.286	38.2434	406.584	15.7409
G-H R33 160	345.579	10467.5	1.39131	17.8946	1.70849	0.508119	3.91361	0.0659742	3.521	411.856	14.0479	417.184	13.3895	446.731	37.9797	411.856	14.0479
G-H R33 233	427.405	10350.8	1.09049	18.1974	1.45082	0.497625	2.60244	0.0657052	2.16051	410.229	8.58692	410.093	8.78053	409.309	32.4553	410.229	8.58692
G-H R33 255	350.733	21025.2	0.964063	17.8505	1.49154	0.502329	3.04668	0.0650619	2.6566	406.337	10.4616	413.278	10.3441	452.205	33.1181	406.337	10.4616
G-H R33 277	139.29	2592.95	1.50372	18.6323	2.01699	0.489421	4.65996	0.0661665	4.20083	413.019	16.8061	404.516	15.5493	356.228	45.534	413.019	16.8061
G-H R33 299	78.0947	3158.69	2.47512	19.271	3.15378	0.484301	6.99373	0.0677183	6.24227	422.394	25.5219	401.019	23.1743	279.661	72.2046	422.394	25.5219
G-H R33 344	161.221	6610.38	1.42377	18.0926	2.07881	0.507179	4.20891	0.066581	3.65971	415.524	14.7273	416.55	14.3822	422.216	46.4119	415.524	14.7273
SL Sri Lanka, primary standard
expected age 563 Ma, Pullen et al., (2018)				Isotope Ratios						Apparent Ages (Ma)						Best Age
Analysis	U (ppm)	206Pb/ 204Pb	U/Th	206Pb/ 207Pb	± (%)	207Pb/ 235U	± (%)	206Pb/ 238U	± (%)	206Pb/ 238U	±	207Pb/ 235U	±	206Pb/ 207Pb	±	Best Age (Ma)	± (Ma)
A SL	1573.32	78736.2	5.50099	17.0841	1.18691	0.73167	2.32013	0.0906972	1.99355	559.659	10.6865	557.533	9.95419	548.88	25.9283	559.659	10.6865
A SL	1716.27	161689	5.67336	17.1935	1.15426	0.726468	2.91147	0.0906294	2.67289	559.259	14.3183	554.478	12.44	534.896	25.2688	559.259	14.3183
A SL	1800.81	88457.4	5.36402	17.2319	0.673454	0.736185	1.31535	0.0920467	1.12987	567.63	6.13921	560.177	5.66325	530.033	14.7729	567.63	6.13921
A SL	1608.73	81900.1	5.62966	17.2729	0.924014	0.742239	2.1109	0.0930242	1.89792	573.398	10.4127	563.711	9.13157	524.789	20.2575	573.398	10.4127
A SL	1830.02	3.77451e+06	5.85091	16.8972	1.18049	0.735586	2.41219	0.0901855	2.10359	556.634	11.218	559.826	10.3811	572.826	25.6697	556.634	11.218
A SL	1710.37	41895.7	5.49378	17.0593	0.717822	0.720055	1.4744	0.0891282	1.28786	550.379	6.79396	550.699	6.2672	552.018	15.6895	550.379	6.79396
A SL	1559.59	22610.9	5.47625	17.2016	0.712868	0.71184	1.51926	0.0888462	1.34163	548.71	7.05704	545.838	6.41485	533.88	15.6188	548.71	7.05704
A SL	1234.18	39511	5.36945	17.0337	0.848382	0.727646	1.6524	0.0899328	1.41798	555.139	7.54237	555.171	7.06672	555.32	18.5073	555.139	7.54237
A SL	1054.4	32067.2	6.10531	17.0642	0.879777	0.739114	1.6421	0.0915136	1.38654	564.482	7.49388	561.888	7.08631	551.377	19.194	564.482	7.49388
A SL	1303.43	60809.6	6.01046	17.0249	0.938643	0.735002	2.18458	0.0907949	1.97265	560.236	10.5849	559.485	9.39721	556.431	20.4753	560.236	10.5849
A SL	1546.67	43735.6	5.45809	16.4317	0.777383	0.75654	1.9612	0.0901991	1.80055	556.715	9.60331	572.012	8.57702	633.298	16.7519	556.715	9.60331
A SL	1083.37	34888.5	6.08394	16.8406	0.753484	0.725028	1.5091	0.0885931	1.30753	547.211	6.85969	553.631	6.44038	580.129	16.3679	547.211	6.85969
A SL	1588.75	32929.6	5.48252	17.2084	0.737235	0.730857	1.67569	0.0912556	1.50479	562.959	8.11201	557.056	7.18457	532.988	16.1536	562.959	8.11201
A SL	1890.71	30479.7	5.5367	17.07	0.624927	0.739876	2.05579	0.0916387	1.95851	565.221	10.5985	562.333	8.87689	550.654	13.6313	565.221	10.5985
A SL	1809.9	565386	5.42931	17.0236	0.786379	0.734579	1.47222	0.0907355	1.24461	559.885	6.67434	559.237	6.33072	556.611	17.13	559.885	6.67434
A SL	1738.66	37309.2	5.36912	17.0984	0.614387	0.738031	1.66511	0.0915627	1.54761	564.772	8.36856	561.256	7.17953	547.005	13.4272	564.772	8.36856
A SL	1732.64	34624	5.51731	17.1308	0.729359	0.731354	1.67778	0.0909063	1.51095	560.895	8.11664	557.348	7.19638	542.902	15.9366	560.895	8.11664
A SL	1632.02	33046.1	5.63574	17.0996	0.80952	0.713964	1.58241	0.0885831	1.35967	547.152	7.13248	547.098	6.69314	546.849	17.6638	547.152	7.13248
A SL	1736.69	127223	5.39343	17.0485	1.01062	0.727739	1.92965	0.0900222	1.64384	555.669	8.75168	555.225	8.25306	553.424	22.0324	555.669	8.75168
A SL	1601.03	150457	5.55284	16.9683	0.919905	0.72003	1.85604	0.0886496	1.61203	547.546	8.46215	550.685	7.88932	563.667	20.0197	547.546	8.46215
A SL	1062.95	29608	6.55496	17.0435	0.91499	0.739316	1.79327	0.0914274	1.54227	563.973	8.32839	562.006	7.7399	554.049	19.9616	563.973	8.32839
A SL	1647.85	50258	5.44295	17.1885	0.869657	0.743763	2.03225	0.09276	1.83678	571.839	10.051	564.599	8.80169	535.556	19.0357	571.839	10.051
A SL	1250.02	38692.3	5.98109	16.955	1.05114	0.731361	2.18258	0.0899741	1.91279	555.384	10.1786	557.351	9.36173	565.416	22.8777	555.384	10.1786
A SL	1528.15	144174	5.45239	16.9671	0.987857	0.758914	2.53375	0.0934305	2.33325	575.794	12.8522	573.383	11.1009	563.818	21.5182	575.794	12.8522
A SL	1685.2	55593.4	5.54974	17.1894	0.875319	0.731908	1.89045	0.0912862	1.67559	563.139	9.03551	557.673	8.11213	535.442	19.1598	563.139	9.03551
A SL	1689.74	292749	5.61043	17.208	0.824032	0.72867	2.19908	0.0909807	2.03886	561.335	10.9607	555.772	9.41245	533.063	18.0443	561.335	10.9607
A SL	1748.67	28950.2	5.5566	17.1602	0.871063	0.741636	2.323	0.0923424	2.15351	569.375	11.7357	563.36	10.0445	539.161	19.0538	569.375	11.7357
A SL	1511.76	192816	5.46004	16.9431	1.09019	0.749562	2.33231	0.0921487	2.06183	568.232	11.2145	567.97	10.1463	566.942	23.7192	568.232	11.2145
A SL	1641.52	51709	5.55193	17.1536	0.989308	0.722542	2.24399	0.0899303	2.01414	555.125	10.7131	552.166	9.55777	539.981	21.6379	555.125	10.7131
A SL	1623.42	621711	5.31292	16.9935	0.713948	0.740483	2.12881	0.0913033	2.00552	563.241	10.8165	562.687	9.19653	560.449	15.5733	563.241	10.8165
A SL	1711.8	67685.3	5.79054	17.0047	0.98788	0.732318	1.99756	0.0903559	1.73618	557.642	9.27475	557.913	8.57455	559.041	21.5429	557.642	9.27475
A SL	1560.99	165119	5.50376	17.101	0.812841	0.729372	2.45837	0.0905019	2.3201	558.505	12.4124	556.185	10.5282	546.678	17.7364	558.505	12.4124
A SL	1496.26	79661.8	5.70851	16.9181	1.01715	0.747882	2.22131	0.0918063	1.97475	566.211	10.7043	566.995	9.65104	570.153	22.134	566.211	10.7043
A SL	1244.12	22924.1	5.89398	17.0612	0.920643	0.736509	1.97798	0.0911751	1.75066	562.483	9.42981	560.366	8.51849	551.767	20.0836	562.483	9.42981
A SL	1542.78	57956.9	5.6705	17.192	0.932868	0.74433	1.84837	0.0928494	1.59569	572.367	8.7395	564.929	8.00875	535.071	20.4373	572.367	8.7395
A SL	1591.4	88421	5.46273	17.0794	0.855815	0.744298	2.25278	0.0922373	2.08389	568.755	11.3445	564.911	9.76088	549.475	18.6872	568.755	11.3445
A SL	1251.18	105148	5.65302	17.0324	1.33635	0.726645	2.26132	0.0898021	1.82421	554.367	9.69019	554.582	9.66328	555.484	29.1522	554.367	9.69019
B SL	1233.6	145307	5.93523	16.9741	0.623509	0.728552	1.86882	0.0897293	1.76174	553.936	9.35139	555.703	7.99806	562.927	13.6049	553.936	9.35139
B SL	1286.94	329516	5.95903	16.9107	0.673725	0.741891	1.37325	0.0910308	1.19663	561.63	6.4362	563.508	5.93888	571.118	14.6728	561.63	6.4362
B SL	1272.04	145182	6.21234	16.8051	0.720437	0.728668	1.78327	0.0888504	1.63127	548.735	8.58095	555.771	7.63264	584.721	15.6176	548.735	8.58095
B SL	1357.27	58276.7	6.03644	17.0125	0.916628	0.748338	2.10643	0.0923748	1.89654	569.567	10.3386	567.26	9.15508	558.001	19.9686	569.567	10.3386
B SL	1029.28	202650	5.78998	17.3603	0.963356	0.728873	2.30236	0.0918116	2.09113	566.242	11.3357	555.892	9.85612	513.703	21.1839	566.242	11.3357
B SL	1275.68	31560.1	6.07748	17.2241	0.671917	0.730271	2.19837	0.091266	2.09317	563.02	11.285	556.712	9.42136	531.023	14.7186	563.02	11.285
B SL	1400.07	131653	6.33337	16.891	0.915193	0.749628	1.9385	0.0918735	1.70886	566.608	9.26923	568.009	8.43347	573.601	19.904	566.608	9.26923
B SL	1506	43457.3	6.09145	17.0181	0.627951	0.746203	2.08463	0.0921415	1.9878	568.19	10.811	566.019	9.04548	557.32	13.694	568.19	10.811
B SL	1228.18	37307.2	6.15243	16.9299	1.05654	0.745376	1.92625	0.0915626	1.61065	564.772	8.70939	565.538	8.35295	568.64	22.9969	564.772	8.70939
B SL	1429.69	46323.3	5.85035	17.1675	0.665166	0.738541	1.35787	0.0919961	1.1838	567.332	6.42902	561.554	5.85712	538.19	14.5546	567.332	6.42902
B SL	1548.08	399624	5.84353	17.3987	0.718844	0.709833	1.60855	0.089611	1.43899	553.236	7.62897	544.647	6.78068	508.89	15.8056	553.236	7.62897
B SL	1091.89	30461.9	5.89109	17.1244	0.778434	0.731929	1.74173	0.0909438	1.5581	561.116	8.37304	557.685	7.47407	543.723	17.0102	561.116	8.37304
B SL	1008.68	73465.2	6.68936	17.088	0.805887	0.704182	1.83035	0.0873099	1.64339	539.608	8.50686	541.286	7.67965	548.381	17.6008	539.608	8.50686
B SL	1357.79	58517.5	5.97353	16.9969	0.841375	0.739602	1.9575	0.0912128	1.76746	562.706	9.52388	562.173	8.45066	560.004	18.3325	562.706	9.52388
B SL	1379.07	43490.1	6.27016	16.9351	0.76785	0.732351	1.97965	0.0899899	1.82466	555.477	9.7112	557.932	8.49788	567.982	16.7353	555.477	9.7112
B SL	1390.38	40408.8	6.11859	16.9691	1.05362	0.728785	2.26827	0.0897319	2.00871	553.952	10.6626	555.84	9.70948	563.561	22.9332	553.952	10.6626
B SL	1397.26	55599.5	6.16631	17.1079	1.16724	0.726193	2.49864	0.0901439	2.20925	556.388	11.7765	554.317	10.6737	545.795	25.5156	556.388	11.7765
B SL	1381.02	109780	6.13076	17.0679	0.874539	0.751634	2.31142	0.0930841	2.13959	573.751	11.7455	569.172	10.0713	550.909	19.0771	573.751	11.7455
B SL	1351.68	311262	6.27402	16.901	0.993867	0.734875	2.17835	0.0901187	1.93841	556.239	10.3301	559.41	9.36949	572.314	21.6148	556.239	10.3301
B SL	1465.78	179493	6.32914	17.092	0.892315	0.736064	2.43884	0.0912844	2.26974	563.129	12.2392	560.106	10.4998	547.864	19.4902	563.129	12.2392
B SL	1332.4	32251.3	6.13953	17.1999	1.28903	0.723754	2.51536	0.0903243	2.15997	557.455	11.5349	552.881	10.7241	534.092	28.2094	557.455	11.5349
B SL	1449.88	99115.9	6.08557	17.1665	1.09971	0.738216	2.04367	0.0919501	1.72256	567.06	9.35069	561.364	8.81317	538.319	24.0603	567.06	9.35069
B SL	1547.71	120998	6.19856	17.3214	0.856064	0.722756	2.25426	0.090837	2.08539	560.485	11.1946	552.292	9.60318	518.63	18.7849	560.485	11.1946
B SL	1524.24	97338.4	6.11118	16.9912	0.92547	0.759281	2.57485	0.0936085	2.40278	576.843	13.2583	573.595	11.2841	560.762	20.1892	576.843	13.2583
B SL	1329.89	381606	5.95506	17.3123	1.11721	0.735669	2.4534	0.0924111	2.18426	569.781	11.9113	559.875	10.5591	519.789	24.5281	569.781	11.9113
B SL	1344.07	40430.4	6.02087	17.104	1.34342	0.74069	2.43958	0.0919223	2.03636	566.896	11.051	562.808	10.5408	546.295	29.352	566.896	11.051
B SL	1187.88	101230	5.91916	16.8211	0.908862	0.727487	1.99716	0.0887908	1.77838	548.382	9.34903	555.077	8.54013	582.616	19.7349	548.382	9.34903
B SL	1393.93	74766.6	6.02898	16.9081	0.923624	0.741816	2.32261	0.091008	2.13107	561.496	11.4595	563.465	10.0442	571.422	20.0945	561.496	11.4595
B SL	1380.95	114223	6.06443	17.1077	0.796365	0.735488	1.77983	0.0912966	1.59172	563.201	8.58416	559.769	7.65896	545.821	17.3802	563.201	8.58416
B SL	1425	625641	6.13358	17.046	0.784492	0.729903	1.95995	0.0902765	1.7961	557.172	9.5871	556.496	8.39709	553.746	17.1277	557.172	9.5871
B SL	1350.38	1.37647e+06	6.06215	17.145	0.799391	0.725118	2.51562	0.0902055	2.38523	556.753	12.7225	553.684	10.7369	541.07	17.4955	556.753	12.7225
B SL	1079.58	48638.5	6.37528	17.0886	0.690225	0.705064	1.84934	0.0874226	1.71571	540.276	8.89174	541.811	7.76503	548.297	15.0545	540.276	8.89174
B SL	1319.26	31582.7	5.97387	17.0787	0.846141	0.733496	1.79527	0.090895	1.58337	560.828	8.50465	558.603	7.71336	549.556	18.476	560.828	8.50465
C SL	735.153	59429.1	6.32458	17.109	1.34072	0.70776	3.34095	0.0878617	3.06014	542.879	15.9326	543.415	14.0601	545.647	29.3026	542.879	15.9326
C SL	610.477	92804.1	6.06633	16.9259	1.13298	0.730138	2.42343	0.0896697	2.14228	553.583	11.3644	556.634	10.3848	569.153	24.6579	553.583	11.3644
C SL	652.315	41760.5	6.25917	16.9715	1.27354	0.719866	2.55328	0.0886463	2.213	547.526	11.6165	550.588	10.8518	563.254	27.7445	547.526	11.6165
C SL	415.744	71034.5	7.35481	17.1719	1.58265	0.718458	2.93505	0.0895176	2.47179	552.684	13.0919	549.756	12.4603	537.646	34.6424	552.684	13.0919
C SL	713.977	216296	6.22281	17.1122	1.15812	0.724623	2.48443	0.0899715	2.19798	555.369	11.6959	553.392	10.5996	545.247	25.3152	555.369	11.6959
C SL	619.834	61161.1	6.13208	17.0786	0.974664	0.718295	2.61518	0.0890107	2.42677	549.684	12.7867	549.66	11.1008	549.565	21.2823	549.684	12.7867
C SL	596.62	59295.3	6.18156	16.6908	1.2567	0.715365	2.7955	0.086635	2.49711	535.605	12.8341	547.927	11.8381	599.478	27.2111	535.605	12.8341
C SL	643.271	292980	6.27971	16.8629	1.14398	0.719774	2.30639	0.0880674	2.00268	544.098	10.4494	550.534	9.80167	577.255	24.8519	544.098	10.4494
C SL	633.914	103042	6.04748	17.0842	1.15399	0.738908	2.77647	0.0915951	2.52529	564.964	13.6597	561.768	11.98	548.867	25.2134	564.964	13.6597
C SL	707.357	151055	6.28877	16.9889	0.986386	0.725881	2.28454	0.0894784	2.06063	552.451	10.9098	554.133	9.75657	561.069	21.4758	552.451	10.9098
C SL	676.249	65095.7	6.51893	17.1085	1.25208	0.713315	2.47273	0.0885483	2.13229	546.946	11.1815	546.713	10.4536	545.721	27.3623	546.946	11.1815
C SL	673.519	113769	6.12653	17.4526	1.29277	0.704042	2.58448	0.0891554	2.23791	550.54	11.8092	541.203	10.8427	502.082	28.4589	550.54	11.8092
C SL	623.576	155874	6.14779	16.9799	1.20866	0.718797	2.61083	0.0885585	2.31422	547.006	12.1367	549.957	11.0868	562.174	26.3245	547.006	12.1367
C SL	427.62	27376.3	7.319	17.2979	1.35723	0.705798	2.98819	0.0885854	2.66218	547.165	13.9655	542.248	12.5549	521.608	29.7921	547.165	13.9655
C SL	655.541	62162.9	6.30914	16.8423	1.35565	0.733363	2.65457	0.0896209	2.28232	553.294	12.1012	558.525	11.4044	579.896	29.4325	553.294	12.1012
C SL	694.165	356617	6.21945	17.0009	1.23401	0.730123	2.5757	0.0900651	2.26085	555.922	12.0419	556.625	11.0373	559.492	26.9026	555.922	12.0419
C SL	722.063	95739.4	6.3662	17.2231	1.12246	0.703032	2.68193	0.0878564	2.43574	542.847	12.6809	540.6	11.2421	531.155	24.5979	542.847	12.6809
C SL	652.087	71852.7	5.90078	17.1524	1.0297	0.719649	2.50259	0.089564	2.28094	552.958	12.0869	550.46	10.6345	540.148	22.5206	552.958	12.0869
C SL	642.622	306182	6.57908	16.8825	1.23469	0.697556	3.13434	0.085448	2.88091	528.56	14.6198	537.33	13.0784	574.749	26.8262	528.56	14.6198
C SL	429.881	306729	6.94672	17.1122	1.34936	0.728469	3.11094	0.0904494	2.80307	558.194	14.9883	555.654	13.3136	545.242	29.4947	558.194	14.9883
C SL	616.086	177742	6.29559	16.8485	1.5957	0.723735	2.33969	0.0884766	1.71111	546.521	8.96612	552.87	9.97496	579.084	34.6547	546.521	8.96612
C SL	644.001	60118.7	6.18966	16.9592	1.41417	0.727183	2.4632	0.0894821	2.0168	552.474	10.6782	554.898	10.5305	564.84	30.7948	552.474	10.6782
C SL	661.753	54063.7	6.20351	16.9694	1.04507	0.730863	3.13828	0.089989	2.95916	555.472	15.749	557.059	13.4561	563.531	22.7755	555.472	15.749
C SL	455.719	52952.2	7.41465	16.9664	1.39904	0.695256	2.99715	0.0855897	2.65058	529.401	13.4715	535.953	12.4816	563.913	30.4894	529.401	13.4715
C SL	444.631	92366	7.21233	17.1408	1.32403	0.720221	3.16388	0.0895744	2.87351	553.02	15.2286	550.798	13.4511	541.616	28.9499	553.02	15.2286
C SL	680.49	55950.3	6.47687	16.7069	1.33433	0.707904	2.70935	0.0858139	2.35799	530.732	12.0133	543.501	11.4031	597.405	28.8819	530.732	12.0133
C SL	652.799	102338	6.04529	16.9611	1.03913	0.712442	2.74	0.0876779	2.53532	541.789	13.1747	546.195	11.5753	564.6	22.6291	541.789	13.1747
C SL	661.584	44185	6.45542	16.9004	1.26161	0.70412	2.6744	0.0863439	2.35813	533.878	12.0823	541.249	11.2207	572.437	27.4214	533.878	12.0823
C SL	632.98	98433.7	6.22911	17.341	1.27038	0.728658	2.69614	0.0916826	2.37809	565.48	12.8747	555.765	11.54	516.145	27.9071	565.48	12.8747
C SL	654.755	90315.9	6.35879	17.1114	1.37578	0.717735	3.12544	0.0891121	2.80635	550.284	14.8021	549.329	13.2609	545.351	30.0636	550.284	14.8021
C SL	681.266	138192	6.19748	17.0413	1.04209	0.717098	2.49744	0.0886682	2.26964	547.656	11.9165	548.952	10.5907	554.313	22.724	547.656	11.9165
C SL	662.562	101104	6.43194	16.999	1.2957	0.71826	2.70706	0.0885917	2.37684	547.203	12.4694	549.639	11.4905	559.728	28.2301	547.203	12.4694
C SL	610.42	186704	6.13161	16.9704	0.847928	0.747295	2.53946	0.0920175	2.39372	567.458	13.0027	566.653	11.0285	563.403	18.4617	567.458	13.0027
C SL	683.877	111116	5.86811	16.9514	1.10073	0.738104	2.58283	0.0907842	2.33653	560.173	12.5361	561.299	11.1374	565.883	23.9693	560.173	12.5361
C SL	431.434	29550.7	7.3082	16.9453	1.31545	0.73589	2.71527	0.0904795	2.37535	558.372	12.7051	560.005	11.6884	566.664	28.6437	558.372	12.7051
C SL	658.49	78212.1	6.13509	17.0916	1.16516	0.720127	2.5431	0.0893056	2.26047	551.429	11.9467	550.742	10.8108	547.922	25.4658	551.429	11.9467
C SL	652.388	84110.9	6.13505	16.9699	1.18965	0.722592	2.31296	0.0889733	1.98355	549.462	10.4473	552.196	9.85194	563.468	25.9238	549.462	10.4473
C SL	659.773	1.02765e+06	5.98372	17.0414	1.21163	0.735039	2.64064	0.0908873	2.34626	560.783	12.6014	559.506	11.3595	554.298	26.4357	560.783	12.6014
C SL	648.108	253203	6.0669	16.9278	1.17536	0.740551	2.34953	0.0909585	2.0344	561.203	10.9343	562.727	10.1506	568.916	25.5911	561.203	10.9343
C SL	759.201	105523	6.214	17.3306	1.16107	0.716137	2.64322	0.0900531	2.37456	555.851	12.646	548.384	11.2002	517.462	25.4832	555.851	12.646
C SL	464.321	488603	7.43172	16.9842	1.59168	0.703947	3.00097	0.0867507	2.54408	536.292	13.0916	541.146	12.5892	561.625	34.669	536.292	13.0916
C SL	670.381	147489	6.33156	16.7182	1.11112	0.713888	2.11479	0.086598	1.79937	535.386	9.24438	547.052	8.94449	595.927	24.0536	535.386	9.24438
C SL	705.684	119568	6.10768	16.9224	1.01118	0.742172	2.18661	0.0911288	1.93875	562.21	10.4381	563.672	9.45859	569.561	21.9845	562.21	10.4381
C SL	664.993	66034.4	6.10326	16.95	1.03867	0.724074	2.33822	0.0890511	2.09485	549.923	11.0424	553.069	9.97138	566.067	22.6063	549.923	11.0424
D SL	691.156	14039	5.7536	17.0279	0.94419	0.738825	2.77079	0.0912829	2.60496	563.12	14.0466	561.72	11.9547	556.055	20.5759	563.12	14.0466
D SL	775.707	65046.9	6.01503	16.8752	1.06572	0.714978	2.41122	0.0875443	2.16292	540.997	11.2238	547.698	10.2074	575.647	23.1735	540.997	11.2238
D SL	733.236	269551	5.92983	17.0707	1.30024	0.705157	2.63333	0.0873423	2.28993	539.8	11.8577	541.866	11.0579	550.589	28.3875	539.8	11.8577
D SL	711.631	26164.7	5.87236	17.1421	1.04942	0.727085	2.44803	0.0904354	2.21168	558.112	11.8244	554.841	10.4648	541.455	22.9473	558.112	11.8244
D SL	689.264	46126.9	5.58034	16.9393	1.15946	0.750115	2.67403	0.0921958	2.40958	568.51	13.1121	568.291	11.6379	567.433	25.2628	568.51	13.1121
D SL	545.501	17368.1	6.73832	17.1627	1.0541	0.705425	2.31777	0.0878464	2.0642	542.788	10.7455	542.026	9.73491	538.802	23.0597	542.788	10.7455
D SL	732.725	34275.7	6.22687	17.2782	1.26799	0.707398	2.07402	0.0886852	1.64126	547.756	8.61877	543.2	8.72533	524.107	27.813	547.756	8.61877
D SL	737.529	20965.8	5.78144	17.101	1.16271	0.723212	2.42658	0.0897377	2.12988	553.986	11.3065	552.561	10.3411	546.675	25.4012	553.986	11.3065
D SL	727.06	126817	5.98145	17.2053	1.16682	0.716709	2.1242	0.0894734	1.77503	552.422	9.39728	548.722	9.00497	533.383	25.5568	552.422	9.39728
D SL	693.359	24032.5	5.62306	17.0664	1.32342	0.711782	3.19802	0.0881408	2.91134	544.532	15.2021	545.804	13.5032	551.102	28.9036	544.532	15.2021
D SL	711.843	54236.3	5.60034	17.0241	0.961373	0.732213	2.48146	0.0904461	2.28766	558.175	12.232	557.851	10.651	556.536	20.9487	558.175	12.232
D SL	727.079	74049.8	5.89422	16.8981	0.996067	0.721829	2.57144	0.0885035	2.37069	546.68	12.4258	551.746	10.9463	572.712	21.6623	546.68	12.4258
D SL	663.751	52852.5	5.84844	17.0693	0.9775	0.731661	2.20499	0.0906179	1.97648	559.19	10.5865	557.528	9.46011	550.765	21.319	559.19	10.5865
D SL	692.889	36708.5	5.81668	16.7767	1.13319	0.740846	2.59242	0.0901824	2.33163	556.616	12.4337	562.899	11.2026	588.365	24.5838	556.616	12.4337
D SL	687.93	29219.3	5.75592	16.9295	1.18496	0.724378	2.65892	0.0889808	2.38028	549.506	12.5378	553.248	11.3419	568.699	25.7992	549.506	12.5378
D SL	715.437	44455.1	5.81135	17.0299	1.14613	0.730734	2.40547	0.0902938	2.11487	557.275	11.2906	556.984	10.3127	555.799	25.0013	557.275	11.2906
D SL	760.967	22951.8	5.75997	17.4817	1.25003	0.687702	2.54031	0.0872314	2.21147	539.142	11.438	531.419	10.5108	498.371	27.5568	539.142	11.438
D SL	748.611	28508.6	5.85954	16.8904	1.22013	0.730309	3.1123	0.0895024	2.86316	552.593	15.1625	556.735	13.3389	573.714	26.5137	552.593	15.1625
D SL	722.226	12605.7	5.71529	17.2582	0.996333	0.713841	2.55223	0.0893894	2.34973	551.925	12.4291	547.025	10.7944	526.686	21.8506	551.925	12.4291
D SL	751.778	48836.1	5.82065	16.9192	1.09283	0.725135	2.43008	0.0890195	2.17049	549.736	11.4374	553.694	10.372	570.017	23.785	549.736	11.4374
D SL	724.514	30981.2	5.86483	17.0837	1.4021	0.714805	2.69045	0.088605	2.29623	547.282	12.0482	547.595	11.388	548.908	30.6382	547.282	12.0482
D SL	675.613	33978.6	5.62178	16.7901	1.20711	0.736554	2.68211	0.0897315	2.39512	553.949	12.7137	560.393	11.5516	586.669	26.1787	553.949	12.7137
D SL	736.692	123402	5.91606	17.0266	1.1873	0.713991	2.33891	0.0882081	2.01515	544.931	10.5298	547.113	9.89329	556.206	25.8763	544.931	10.5298
D SL	735.228	133460	5.81141	16.6945	1.06897	0.718073	2.01396	0.0869819	1.70685	537.663	8.80483	549.529	8.54709	599.025	23.1276	537.663	8.80483
D SL	684.112	33649.6	5.74306	17.2035	0.934226	0.719161	2.50322	0.0897697	2.32235	554.175	12.3322	550.171	10.6329	533.611	20.443	554.175	12.3322
D SL	733.103	51697.9	6.0072	16.6755	0.943746	0.717921	2.42309	0.0868647	2.23175	536.968	11.4983	549.439	10.2822	601.465	20.4194	536.968	11.4983
D SL	689.969	26213.4	5.90922	17.3496	1.12216	0.714207	2.32402	0.0899086	2.03515	554.997	10.8225	547.241	9.83207	515.06	24.6605	554.997	10.8225
D SL	655.393	10768.8	5.60315	17.2657	1.10575	0.720786	2.7439	0.0902979	2.51124	557.299	13.4073	551.131	11.6707	525.741	24.2474	557.299	13.4073
D SL	756.531	23185.6	6.04527	17.2242	1.01264	0.703641	3.03413	0.0879384	2.86016	543.333	14.9033	540.963	12.7251	531.011	22.1681	543.333	14.9033
D SL	718.317	120684	5.83855	17.0275	1.02032	0.716696	2.34374	0.0885471	2.11	546.939	11.0644	548.714	9.93563	556.082	22.2581	546.939	11.0644
D SL	671.275	21685.8	5.77895	17.0271	1.13006	0.726154	2.96376	0.0897134	2.73986	553.842	14.5409	554.293	12.6603	556.161	24.6494	553.842	14.5409
D SL	670.976	27978.1	5.66477	17.1722	0.897764	0.724397	2.17269	0.0902589	1.97853	557.068	10.559	553.259	9.26784	537.625	19.661	557.068	10.559
D SL	828.466	50106.4	5.42011	17.0969	0.853271	0.705836	2.39338	0.0875606	2.23611	541.094	11.6056	542.27	10.0559	547.242	18.6389	541.094	11.6056
D SL	748.402	24117.3	6.03663	16.7547	1.10395	0.711581	2.71921	0.0865066	2.48504	534.843	12.7547	545.685	11.4794	591.217	23.9164	534.843	12.7547
D SL	793.844	18434.1	5.66955	16.8967	1.01663	0.721146	2.3497	0.0884123	2.11838	546.14	11.0928	551.343	9.9968	572.9	22.1094	546.14	11.0928
D SL	782.26	16513	5.8206	16.9779	1.15941	0.713141	2.44986	0.0878512	2.15814	542.816	11.2351	546.61	10.3555	562.433	25.2573	542.816	11.2351
D SL	754.092	31254.9	6.06644	17.1033	1.10688	0.722476	2.46777	0.0896584	2.2056	553.516	11.6989	552.127	10.5104	546.38	24.1901	553.516	11.6989
D SL	703.17	18198	5.90471	17.368	1.17316	0.706873	2.42692	0.0890796	2.12453	550.092	11.2021	542.888	10.2056	512.754	25.7748	550.092	11.2021
E SL	1311.6	99500.3	5.95947	16.9929	1.05993	0.739611	2.73439	0.0911927	2.5206	562.587	13.5794	562.179	11.8049	560.547	23.0899	562.587	13.5794
E SL	1440.71	75260.7	6.22894	16.9652	0.983858	0.731356	2.3837	0.0900275	2.17119	555.7	11.5599	557.348	10.2244	564.068	21.4394	555.7	11.5599
E SL	1280.52	151588	5.99706	17.1982	0.90895	0.73308	2.24316	0.0914789	2.05075	564.278	11.0799	558.359	9.63466	534.327	19.8993	564.278	11.0799
E SL	1566.79	33517.9	5.93952	17.0695	0.961437	0.722963	2.64343	0.0895417	2.46238	552.826	13.0454	552.415	11.263	550.697	20.9756	552.826	13.0454
E SL	1286.09	71069.7	5.71044	17.0909	1.05763	0.740889	2.33312	0.0918768	2.07963	566.627	11.2807	562.924	10.0824	548.008	23.1112	566.627	11.2807
E SL	1568.52	93757.4	5.71741	17.2626	0.903369	0.737529	1.92259	0.092379	1.69714	569.591	9.25198	560.962	8.28653	526.132	19.8056	569.591	9.25198
E SL	1536.72	323292	5.6709	16.9378	0.734482	0.737824	1.53489	0.0906772	1.34775	559.541	7.22318	561.135	6.61698	567.624	15.9682	559.541	7.22318
E SL	1233.48	88275.9	5.64932	16.6162	0.78124	0.750216	1.75864	0.0904495	1.57559	558.195	8.42487	568.35	7.65439	609.168	16.8677	558.195	8.42487
E SL	1446.36	39004.1	5.79841	17.0673	0.584404	0.732075	1.76006	0.0906587	1.66021	559.432	8.89614	557.771	7.55362	551.019	12.7585	559.432	8.89614
E SL	1088.45	32575.6	6.28032	17.1428	0.878491	0.732461	1.61016	0.0911073	1.3494	562.082	7.26349	557.996	6.91238	541.345	19.2134	562.082	7.26349
E SL	1370.47	105400	5.78912	17.0283	0.868055	0.745236	2.05435	0.0920775	1.86194	567.812	10.1201	565.457	8.90748	556.014	18.9436	567.812	10.1201
E SL	1505.26	30393.3	5.68441	17.3136	0.951524	0.725887	1.86787	0.0911896	1.60734	562.568	8.65906	554.136	7.97704	519.616	20.8907	562.568	8.65906
E SL	1469.13	98514.1	5.75102	16.9839	0.809531	0.746372	1.60817	0.0919773	1.38956	567.221	7.54508	566.117	6.97892	561.666	17.6573	567.221	7.54508
E SL	1398.85	106773	6.02222	16.9916	0.848474	0.722061	1.5257	0.0890218	1.26801	549.749	6.6819	551.883	6.49575	560.699	18.4927	549.749	6.6819
E SL	1462.39	338253	5.79715	17.3207	0.615779	0.740742	1.87427	0.0930935	1.77022	573.807	9.71872	562.839	8.09847	518.724	13.5378	573.807	9.71872
E SL	1571.07	100099	5.57739	17.1075	0.817892	0.741771	2.00072	0.0920757	1.82591	567.802	9.92407	563.439	8.65179	545.839	17.85	567.802	9.92407
E SL	1598.58	41590.8	5.73501	17.2076	1.19548	0.73608	2.11824	0.0919035	1.74865	566.785	9.48789	560.115	9.11953	533.1	26.1713	566.785	9.48789
E SL	1443.23	47441.3	5.85546	17.2254	0.844821	0.724415	1.8656	0.0905411	1.66336	558.736	8.90241	553.27	7.958	530.856	18.4851	558.736	8.90241
E SL	1102.37	116029	6.45654	16.9892	0.906301	0.726574	1.92438	0.0895656	1.6976	552.968	8.99585	554.541	8.22289	561	19.7439	552.968	8.99585
E SL	1398.71	55935.7	5.86854	16.9903	0.721083	0.738909	1.95377	0.0910919	1.81583	561.992	9.77266	561.769	8.42999	560.866	15.7366	561.992	9.77266
E SL	1421.44	1.77023e+06	6.02991	16.9151	1.0364	0.740726	1.92892	0.0909119	1.62684	560.928	8.73965	562.829	8.33453	570.5	22.5509	560.928	8.73965
E SL	1496.27	47417.4	5.73974	17.1904	0.850963	0.743837	1.77172	0.0927793	1.55398	571.953	8.50518	564.642	7.67372	535.274	18.6478	571.953	8.50518
E SL	1436.67	50826.2	5.66026	17.2218	1.0286	0.731628	2.20693	0.0914232	1.95257	563.949	10.5436	557.508	9.4682	531.32	22.5215	563.949	10.5436
E SL	1421.12	45638.7	5.77517	17.1194	0.858672	0.741224	1.93711	0.0920718	1.7364	567.778	9.43719	563.119	8.37314	544.334	18.7458	567.778	9.43719
E SL	1251.21	91492.1	5.55159	17.1917	0.915943	0.710131	2.83717	0.0885818	2.68525	547.144	14.086	544.824	11.9631	535.111	20.071	547.144	14.086
E SL	1460.86	33641.7	5.9759	17.3339	0.85052	0.71596	1.81918	0.0900479	1.60812	555.82	8.56375	548.279	7.70719	517.043	18.6868	555.82	8.56375
E SL	1054.66	51035.5	6.75314	16.9172	1.12159	0.73622	2.42691	0.09037	2.15219	557.725	11.4987	560.197	10.4496	570.234	24.4263	557.725	11.4987
F SL	1026.81	263404	5.35669	17.0424	1.01451	0.755456	2.77571	0.0934173	2.58367	575.716	14.2297	571.385	12.1295	554.173	22.1356	575.716	14.2297
F SL	1203.38	89749.3	5.38626	17.013	1.13358	0.718037	2.33065	0.0886372	2.0364	547.472	10.6885	549.508	9.8909	557.948	24.7115	547.472	10.6885
F SL	1181.96	119097	5.34292	16.9947	1.12745	0.726217	2.72245	0.0895504	2.47802	552.878	13.1294	554.33	11.63	560.285	24.5841	552.878	13.1294
F SL	980.966	216530	5.03866	16.9516	1.01021	0.742154	2.23189	0.0912835	1.99018	563.123	10.7316	563.662	9.65435	565.856	21.9852	563.123	10.7316
F SL	1193.78	171969	5.5315	17.0833	1.09704	0.721788	2.13851	0.0894684	1.83568	552.392	9.71784	551.722	9.10295	548.947	23.9648	552.392	9.71784
F SL	1060.95	83763.5	5.04701	16.798	1.23421	0.745437	2.5089	0.0908566	2.18434	560.601	11.7281	565.573	10.8802	585.642	26.7836	560.601	11.7281
F SL	1180.44	699655	5.5046	16.8672	0.854662	0.715339	2.98655	0.0875473	2.86165	541.015	14.8501	547.912	12.6469	576.682	18.5862	541.015	14.8501
F SL	1168.98	209596	5.33715	17.1542	1.04462	0.72348	2.46099	0.0900504	2.22828	555.835	11.8667	552.719	10.49	539.905	22.8476	555.835	11.8667
F SL	1138.42	319290	5.4368	17.0713	1.02201	0.720859	2.5644	0.0892902	2.35194	551.338	12.4281	551.174	10.9078	550.499	22.3076	551.338	12.4281
F SL	1001.15	91714.2	5.16104	17.1484	1.09998	0.716091	2.20433	0.0891004	1.91026	550.215	10.0745	548.356	9.34	540.621	24.0557	550.215	10.0745
F SL	1164.05	92720.6	5.46323	17.0365	1.07071	0.710336	2.51848	0.0878075	2.27954	542.557	11.8617	544.946	10.621	554.968	23.3547	542.557	11.8617
F SL	1157.39	128197	5.22737	17.0686	1.21021	0.716454	2.43701	0.0887305	2.11528	548.025	11.1132	548.571	10.329	550.835	26.4424	548.025	11.1132
F SL	1062.16	121084	5.23812	17.1059	1.00404	0.729052	2.69714	0.0904884	2.5033	558.425	13.3907	555.997	11.5479	546.046	21.9579	558.425	13.3907
F SL	1248.88	156945	5.36857	17.0072	1.35378	0.728488	2.37841	0.0898965	1.95554	554.925	10.3978	555.665	10.1786	558.68	29.5069	554.925	10.3978
F SL	1136.95	76342.7	5.46055	17.134	1.40102	0.734246	2.91924	0.0912829	2.56108	563.12	13.81	559.042	12.5503	542.499	30.6473	563.12	13.81
F SL	1183.66	809938	5.5623	16.9975	0.961646	0.718022	2.40604	0.0885547	2.20551	546.984	11.5661	549.498	10.2107	559.953	20.9622	546.984	11.5661
F SL	1146.31	457955	5.33628	17.0035	1.07792	0.724586	2.56781	0.0893954	2.33061	551.96	12.3287	553.37	10.9551	559.19	23.4997	551.96	12.3287
F SL	1191.01	298764	5.32339	17.2106	0.888387	0.723984	2.46803	0.0904093	2.3026	557.957	12.3072	553.016	10.5243	532.718	19.4438	557.957	12.3072
F SL	1264.73	129042	5.4517	16.8928	1.07006	0.70793	2.36831	0.0867722	2.11278	536.419	10.8747	543.516	9.96788	573.387	23.2661	536.419	10.8747
F SL	1047	824430	5.32628	17.0459	1.24197	0.736941	2.80734	0.0911469	2.51768	562.316	13.5574	560.619	12.0947	553.748	27.1012	562.316	13.5574
F SL	1235.74	183515	5.30239	17.0767	0.864495	0.725093	2.24666	0.0898431	2.07367	554.609	11.0199	553.669	9.58873	549.794	18.8761	554.609	11.0199
F SL	1128.06	303390	5.30899	17.0341	0.989077	0.73707	2.58796	0.0910994	2.39149	562.036	12.8718	560.694	11.1505	555.274	21.5847	562.036	12.8718
G-H SL	1460.64	71433.6	5.73777	17.1376	0.869902	0.73469	2.22515	0.0913572	2.04806	563.559	11.0519	559.302	9.56938	542.033	19.0302	563.559	11.0519
G-H SL	1507.56	33452.1	5.55017	17.2534	1.01049	0.740275	2.56207	0.0926733	2.35439	571.328	12.8724	562.566	11.0666	527.308	22.1538	571.328	12.8724
G-H SL	1423.67	120517	5.38554	17.1096	0.724809	0.72626	1.63381	0.0901614	1.46424	556.491	7.80657	554.356	6.97951	545.573	15.8166	556.491	7.80657
G-H SL	1483.68	33604.8	5.62324	17.1831	0.722718	0.716824	1.85322	0.0893721	1.70648	551.823	9.02499	548.79	7.8569	536.204	15.8179	551.823	9.02499
G-H SL	1596.03	245631	5.70807	17.1326	1.01797	0.723303	2.06605	0.089915	1.79786	555.034	9.56123	552.615	8.80522	542.677	22.255	555.034	9.56123
G-H SL	1614.63	465976	4.87148	17.1341	0.670484	0.729049	1.66877	0.0906368	1.52815	559.302	8.18669	555.995	7.14467	542.496	14.6484	559.302	8.18669
G-H SL	1390.76	40248.2	5.46115	17.14	0.617593	0.721936	1.34193	0.0897839	1.19136	554.259	6.32732	551.809	5.71274	541.713	13.5036	554.259	6.32732
G-H SL	1377.08	64032.9	5.46175	17.2285	0.856948	0.716814	1.50653	0.089607	1.23907	553.213	6.56878	548.784	6.38701	530.463	18.7918	553.213	6.56878
G-H SL	1711.22	32338.7	5.40327	17.3446	0.728881	0.712266	1.88459	0.0896386	1.73793	553.399	9.21644	546.091	7.96024	515.691	16.0079	553.399	9.21644
G-H SL	1460.88	67779.1	5.22931	17.1548	0.813613	0.73535	1.54205	0.091531	1.30994	564.585	7.08112	559.688	6.635	539.826	17.808	564.585	7.08112
G-H SL	1433.31	194125	5.45274	17.1699	0.94007	0.721535	1.83308	0.0898905	1.57368	554.89	8.3669	551.572	7.8012	537.902	20.5896	554.89	8.3669
G-H SL	1291.71	418423	5.52179	17.0245	0.627482	0.73018	1.2764	0.090197	1.11151	556.702	5.92814	556.659	5.46963	556.469	13.6829	556.702	5.92814
G-H SL	1436.53	135017	5.55443	17.1358	0.677194	0.721394	1.31595	0.089694	1.12833	553.727	5.98705	551.489	5.5997	542.237	14.7977	553.727	5.98705
G-H SL	855.536	40311.9	6.52618	17.0379	0.961092	0.718413	1.89622	0.0888134	1.63461	548.515	8.59525	549.729	8.04961	554.784	20.95	548.515	8.59525
G-H SL	1072.57	44389.1	5.70944	17.0133	0.869568	0.747362	1.95515	0.0922586	1.75113	568.881	9.53496	566.693	8.49118	557.926	18.951	568.881	9.53496
G-H SL	1476.33	155444	5.4063	17.088	0.656691	0.740468	1.75553	0.0918091	1.62808	566.227	8.82539	562.678	7.58381	548.376	14.3212	566.227	8.82539
G-H SL	1397.02	60592.7	5.39205	17.0003	0.574996	0.732895	1.50472	0.0904036	1.39053	557.924	7.43183	558.251	6.46191	559.585	12.5344	557.924	7.43183
G-H SL	1529.58	57826.2	5.49	17.0631	0.787241	0.730567	1.71028	0.0904492	1.51832	558.193	8.11863	556.886	7.33122	551.567	17.1998	558.193	8.11863
G-H SL	1500.7	105287	5.38405	17.4375	0.754884	0.704766	1.73609	0.0891695	1.56338	550.624	8.25096	541.634	7.28769	503.974	16.6124	550.624	8.25096
G-H SL	1447.22	46537.4	5.25688	17.221	0.67032	0.717229	1.64191	0.0896196	1.49884	553.287	7.94698	549.03	6.96329	531.426	14.6822	553.287	7.94698
G-H SL	1464.49	48876.8	5.37358	17.2972	0.609535	0.715319	1.55322	0.0897764	1.42862	554.215	7.58682	547.9	6.57693	521.706	13.3713	554.215	7.58682
G-H SL	1490.35	1.15926e+06	5.65458	17.0672	0.856411	0.722686	1.67979	0.089495	1.44508	552.55	7.65216	552.252	7.15543	551.042	18.6854	552.55	7.65216
G-H SL	1335.58	36881.7	5.45503	17.3475	0.698362	0.706079	1.91351	0.0888748	1.78152	548.879	9.37368	542.416	8.04126	515.323	15.3386	548.879	9.37368
G-H SL	1449.98	77191.8	5.35316	17.1507	0.609065	0.726318	1.51529	0.0903848	1.38749	557.813	7.41422	554.39	6.47347	540.34	13.3195	557.813	7.41422
G-H SL	923.852	33487.6	5.68298	17.1343	0.853816	0.730889	1.98552	0.0908667	1.79257	560.661	9.62558	557.075	8.51328	542.468	18.6664	560.661	9.62558
G-H SL	1411.6	43194.3	5.29623	17.2008	0.710227	0.717267	1.62737	0.0895193	1.4642	552.694	7.75537	549.052	6.90184	533.952	15.5626	552.694	7.75537
G-H SL	1436.61	80332.1	5.2683	17.1082	0.737728	0.732564	1.4466	0.0909361	1.24435	561.071	6.68648	558.057	6.21068	545.761	16.098	561.071	6.68648
G-H SL	1384.2	568551	5.37781	17.028	0.613384	0.729053	1.68839	0.0900761	1.57303	555.987	8.37933	555.997	7.22873	556.045	13.3795	555.987	8.37933
G-H SL	1504.14	73217.4	5.19773	17.0376	0.794231	0.735969	1.55027	0.090982	1.33137	561.342	7.15738	560.051	6.67362	554.826	17.3178	561.342	7.15738
G-H SL	1413.34	201222	5.38158	17.131	0.690932	0.718176	2.01063	0.0892693	1.88819	551.214	9.9754	549.589	8.53366	542.882	15.0838	551.214	9.9754
G-H SL	1420.38	67377.3	5.40326	17.296	0.776456	0.715581	1.73972	0.0898035	1.55684	554.375	8.27002	548.055	7.36826	521.848	17.0208	554.375	8.27002
G-H SL	1416.45	135785	5.54336	17.0888	0.760468	0.738423	1.49246	0.09156	1.28418	564.756	6.94388	561.485	6.43706	548.271	16.5892	564.756	6.94388
G-H SL	1505.02	188327	5.51909	17.0718	0.85757	0.725558	1.65448	0.0898748	1.41488	554.796	7.52142	553.942	7.06385	550.454	18.723	554.796	7.52142
G-H SL	1477.37	51005.1	5.49916	17.0272	0.738521	0.727504	1.87592	0.0898805	1.72444	554.831	9.16753	555.087	8.02178	556.155	16.0988	554.831	9.16753
G-H SL	1392.99	112010	5.59217	17.1315	0.719713	0.69457	1.81127	0.0863375	1.66214	533.84	8.51571	535.543	7.53838	542.781	15.7333	533.84	8.51571
G-H SL	1260.2	77077.3	5.38913	16.9819	0.727913	0.719025	1.59401	0.0885967	1.4181	547.233	7.44006	550.091	6.77001	561.925	15.8621	547.233	7.44006
G-H SL	1577.33	71249.3	5.87778	17.1432	1.02545	0.72509	2.33242	0.0901926	2.0949	556.676	11.1725	553.667	9.95474	541.306	22.4238	556.676	11.1725
G-H SL	1400.72	122796	5.73951	17.1009	1.07712	0.718267	2.50851	0.0891233	2.26549	550.35	11.9508	549.643	10.6477	546.693	23.551	550.35	11.9508
G-H SL	1569.85	848654	5.64423	17.1431	1.03315	0.718384	2.20542	0.0893579	1.94846	551.739	10.3032	549.712	9.36203	541.316	22.592	551.739	10.3032
G-H SL	1474.73	83844.1	5.44333	17.27	0.985137	0.730012	2.08039	0.0914764	1.83236	564.263	9.89973	556.56	8.91388	525.155	21.5802	564.263	9.89973
G-H SL	1382	336071	5.78476	17.1819	0.763458	0.721673	2.33579	0.0899703	2.2075	555.361	11.7464	551.654	9.94186	536.356	16.7198	555.361	11.7464
G-H SL	1388.67	42660.8	5.47795	16.9159	0.904231	0.731541	2.44695	0.0897887	2.27374	554.287	12.0765	557.457	10.4973	570.429	19.6642	554.287	12.0765
G-H SL	1468.86	38577.6	5.71733	17.1389	0.869754	0.725475	2.29535	0.0902178	2.12418	556.825	11.3316	553.894	9.79954	541.859	19.0178	556.825	11.3316
G-H SL	1043.32	30045.2	6.2205	17.1298	0.904426	0.713673	2.06761	0.0887029	1.85931	547.862	9.7656	546.925	8.74341	543.016	19.771	547.862	9.7656
G-H SL	938.902	62906.8	6.61788	17.0631	1.04315	0.725397	2.18047	0.0898096	1.91476	554.411	10.1719	553.848	9.30848	551.557	22.7615	554.411	10.1719
G-H SL	1415.33	37099.7	5.75176	17.1483	0.774766	0.722307	1.70285	0.0898734	1.51639	554.789	8.06093	552.028	7.25146	540.657	16.9597	554.789	8.06093
G-H SL	1426.83	32526.2	5.57223	17.0658	0.782023	0.72496	2.31388	0.0897692	2.17772	554.172	11.5642	553.591	9.87459	551.18	17.0817	554.172	11.5642
FC-1, primary standard
expected age 1099 Ma, Pullen et al., (2018)				Isotope Ratios						Apparent Ages (Ma)						Best Age
Analysis	U (ppm)	206Pb/ 204Pb	U/Th	206Pb/ 207Pb	± (%)	207Pb/ 235U	± (%)	206Pb/ 238U	± (%)	206Pb/ 238U	±	207Pb/ 235U	±	206Pb/ 207Pb	±	Best Age (Ma)	± (Ma)
A FC	327.153	34472.4	2.91127	13.1969	1.03789	1.99136	3.41393	0.190682	3.25234	1125.07	33.5763	1112.59	23.0803	1088.25	20.781	1088.25	20.781
A FC	229.327	36415.7	1.91229	12.9305	0.941241	1.96813	3.20522	0.184653	3.0639	1092.35	30.7866	1104.67	21.5836	1129.03	18.7483	1129.03	18.7483
A FC	574.249	125799	1.94213	13.0935	1.4157	1.90388	2.97928	0.180876	2.62143	1071.76	25.8843	1082.45	19.8361	1104.02	28.2932	1104.02	28.2932
A FC	428.502	123299	1.48978	12.9857	0.819888	1.94294	2.97194	0.183068	2.85661	1083.71	28.4953	1096.01	19.9252	1120.53	16.3713	1120.53	16.3713
A FC	461.073	18861.5	1.39644	13.1182	0.989929	2.04641	3.43146	0.194785	3.28557	1147.25	34.5302	1131.1	23.4094	1100.26	19.8066	1100.26	19.8066
A FC	318.321	40249.3	2.11959	12.9116	1.18117	1.99244	2.85232	0.186662	2.59627	1103.27	26.3268	1112.95	19.286	1131.9	23.5187	1131.9	23.5187
A FC	298.891	28877.6	2.17798	12.9582	1.09865	1.93955	3.42008	0.182362	3.23881	1079.86	32.2026	1094.84	22.9171	1124.73	21.8994	1124.73	21.8994
A FC	652.415	50349.2	1.39441	13.3307	0.796068	1.96958	2.66999	0.190509	2.54855	1124.13	26.2904	1105.16	17.983	1068.04	15.9967	1068.04	15.9967
A FC	563.059	25993	1.47215	13.1966	0.89362	1.94266	2.42583	0.186014	2.25523	1099.75	22.8017	1095.92	16.2624	1088.3	17.8894	1088.3	17.8894
A FC	410.537	52225.6	1.3921	13.159	1.15158	2.04706	3.06167	0.195452	2.83685	1150.84	29.8996	1131.32	20.8881	1094.02	23.0586	1094.02	23.0586
A FC	313.497	79187.8	1.84594	12.816	1.20077	1.9807	3.02364	0.184188	2.77498	1089.81	27.8241	1108.96	20.4042	1146.72	23.8593	1146.72	23.8593
A FC	1524.3	149091	2.12652	13.4107	0.893266	2.18398	11.5403	0.212514	11.5056	1242.2	130.014	1175.95	80.5442	1056.01	18.0063	1056.01	18.0063
A FC	306.013	13570.1	1.88039	13.1454	0.836274	1.8168	2.82862	0.173289	2.70217	1030.2	25.7276	1051.53	18.527	1096.12	16.74	1096.12	16.74
A FC	372.396	27888.1	2.13332	13.2352	0.920463	1.89913	2.87573	0.182378	2.72444	1079.95	27.0904	1080.78	19.1301	1082.48	18.4512	1082.48	18.4512
A FC	355.214	19010.1	2.79065	13.1051	0.879133	2.00876	2.58572	0.19101	2.43168	1126.85	25.1402	1118.47	17.5305	1102.24	17.5788	1102.24	17.5788
A FC	508.775	18325.1	1.76436	13.1981	0.970319	1.94108	2.14913	0.185885	1.91761	1099.04	19.3768	1095.37	14.4032	1088.07	19.4277	1088.07	19.4277
A FC	318.145	18842.3	2.22191	12.9421	1.03076	1.94604	2.8273	0.182744	2.63271	1081.95	26.2227	1097.08	18.9656	1127.21	20.5563	1127.21	20.5563
A FC	380.363	430465	2.10428	13.0526	0.962268	1.94173	3.15901	0.183896	3.00889	1088.23	30.1291	1095.59	21.1753	1110.25	19.2088	1110.25	19.2088
A FC	483.528	36413.2	1.36731	13.0421	1.00839	2.01495	2.8338	0.190677	2.64832	1125.04	27.3398	1120.56	19.2325	1111.86	20.1187	1111.86	20.1187
A FC	473.328	68963.7	1.48337	13.2793	0.899447	1.91953	2.63036	0.184952	2.4718	1093.97	24.8709	1087.9	17.5619	1075.79	18.0437	1075.79	18.0437
A FC	142.01	18535.7	2.25338	13.1153	1.3339	2.01478	5.39231	0.191731	5.22473	1130.74	54.1883	1120.5	36.6071	1100.69	26.6705	1100.69	26.6705
A FC	388.086	27478.3	1.59233	13.0772	1.03503	1.87133	2.64857	0.177563	2.43796	1053.65	23.6982	1071	17.5288	1106.49	20.6867	1106.49	20.6867
A FC	290.678	34136.6	1.8627	12.7796	0.953455	1.99743	3.23212	0.185216	3.08829	1095.41	31.1114	1114.64	21.8729	1152.33	18.9454	1152.33	18.9454
A FC	309.942	17503.7	1.77954	13.0161	1.0765	1.91048	3.00374	0.180431	2.80422	1069.33	27.6314	1084.75	20.0229	1115.88	21.5025	1115.88	21.5025
A FC	611.62	96842.5	1.17426	13.6056	1.02047	1.85849	3.35259	0.18347	3.1935	1085.9	31.9151	1066.45	22.1361	1026.85	20.6598	1026.85	20.6598
A FC	277.981	10614.3	1.57687	13.2817	0.914696	1.93042	2.99908	0.186035	2.85619	1099.86	28.8805	1091.68	20.063	1075.43	18.3586	1075.43	18.3586
A FC	508.569	42367.4	2.83884	13.0099	0.860852	1.95803	2.43137	0.184834	2.27387	1093.33	22.8671	1101.21	16.3431	1116.83	17.1785	1116.83	17.1785
A FC	529.826	193905	1.90075	13.0436	0.883321	1.90984	2.44567	0.180751	2.28058	1071.08	22.5055	1084.53	16.3002	1111.63	17.6502	1111.63	17.6502
A FC	439.679	137291	2.35783	13.0509	0.626415	1.96651	2.70553	0.186219	2.63202	1100.86	26.636	1104.11	18.2129	1110.51	12.5039	1110.51	12.5039
A FC	141.121	175962	2.00718	12.8464	1.21006	2.14405	4.58966	0.199849	4.42727	1174.51	47.5377	1163.13	31.7905	1141.98	24.0393	1141.98	24.0393
A FC	435.58	393678	1.58176	12.9454	1.13467	1.93735	3.12747	0.181976	2.91438	1077.76	28.9249	1094.08	20.9477	1126.71	22.6078	1126.71	22.6078
A FC	682.588	152277	1.32832	12.9405	1.06858	1.97929	2.39729	0.185844	2.14596	1098.82	21.6802	1108.48	16.1728	1127.47	21.3005	1127.47	21.3005
A FC	438.466	19508.8	1.50522	13.1623	1.02009	1.91018	3.20031	0.18243	3.03338	1080.23	30.1695	1084.65	21.3324	1093.51	20.4269	1093.51	20.4269
A FC	273.17	13214.8	1.80819	13.0434	0.956437	1.98385	4.44322	0.187754	4.33906	1109.2	44.2164	1110.03	30.0045	1111.65	19.092	1111.65	19.092
A FC	292.328	11095.7	2.09408	13.2588	1.1838	1.91384	3.84468	0.184119	3.65789	1089.44	36.6654	1085.92	25.6462	1078.89	23.7385	1078.89	23.7385
A FC	487.244	28780.5	1.488	13.0329	0.882233	1.98901	3.24668	0.18809	3.12451	1111.02	31.8875	1111.79	21.9405	1113.26	17.632	1113.26	17.632
B FC	441.048	37056.5	1.675	13.1519	0.653648	1.98929	2.12522	0.189834	2.0222	1120.48	20.7985	1111.88	14.3613	1095.12	13.0673	1095.12	13.0673
B FC	653.457	89921.1	1.50549	13.4023	0.751756	1.91817	2.21978	0.186533	2.08861	1102.57	21.1667	1087.43	14.8166	1057.26	15.155	1057.26	15.155
B FC	407.906	31351.8	1.74486	13.0535	0.732277	1.95999	2.41143	0.185639	2.29755	1097.71	23.1901	1101.88	16.2145	1110.11	14.6259	1110.11	14.6259
B FC	389.34	26283.8	1.64183	13.0892	0.860226	1.90367	3.02264	0.180797	2.89765	1071.33	28.6011	1082.37	20.1242	1104.68	17.2095	1104.68	17.2095
B FC	158.89	12960.9	2.56767	13.1996	1.02124	1.96304	3.18475	0.188009	3.01657	1110.58	30.7747	1102.93	21.427	1087.87	20.448	1087.87	20.448
B FC	256.517	30776.4	2.554	13.0875	1.19665	1.97129	3.15307	0.187195	2.91717	1106.16	29.6521	1105.75	21.2438	1104.92	23.9413	1104.92	23.9413
B FC	501.534	639957	1.27722	13.2811	1.01418	1.84836	30.0171	0.178118	30	1056.69	292.589	1062.85	200.344	1075.5	20.3435	1075.5	20.3435
B FC	289.596	38102.9	1.98968	13.0552	0.837335	1.95299	2.54394	0.184999	2.40219	1094.23	24.1757	1099.47	17.085	1109.86	16.72	1109.86	16.72
B FC	384.738	32532.6	1.26308	13.03	0.775529	1.93371	2.47777	0.18282	2.35328	1082.36	23.4476	1092.83	16.5846	1113.74	15.4869	1113.74	15.4869
B FC	550.101	89339.6	1.59835	13.1041	0.785878	1.97823	2.0852	0.188092	1.93144	1111.03	19.7116	1108.12	14.0645	1102.4	15.7341	1102.4	15.7341
B FC	369.605	32191	1.5488	12.9384	0.93142	1.94707	2.85809	0.18279	2.70206	1082.2	26.9191	1097.44	19.1756	1127.78	18.5751	1127.78	18.5751
B FC	425.342	313088	2.46944	13.0237	0.852475	1.94299	2.75115	0.183609	2.61574	1086.66	26.1577	1096.03	18.4448	1114.71	17.0009	1114.71	17.0009
B FC	428.27	712563	1.65751	13.1269	0.928067	1.9719	1.88964	0.187817	1.64604	1109.54	16.7781	1105.96	12.7316	1098.9	18.5833	1098.9	18.5833
B FC	681.159	655978	2.14788	13.1852	0.743038	1.97562	2.00409	0.189008	1.86125	1116	19.073	1107.23	13.5113	1090.02	14.8933	1090.02	14.8933
B FC	242.177	118567	2.1604	13.0416	1.00906	1.989	2.9605	0.188215	2.78323	1111.7	28.4204	1111.78	20.006	1111.93	20.1315	1111.93	20.1315
B FC	267.527	31023.1	1.69641	12.9744	0.897206	2.04249	3.66863	0.19228	3.55723	1133.72	36.9821	1129.79	25.0122	1122.26	17.8894	1122.26	17.8894
B FC	411.864	1.25734e+06	1.62368	13.0037	0.840968	1.96218	2.38984	0.185137	2.23699	1094.98	22.5273	1102.63	16.0755	1117.78	16.7961	1117.78	16.7961
B FC	631.383	76925.9	2.00396	13.2201	0.761136	1.96222	2.13242	0.188222	1.99196	1111.73	20.341	1102.64	14.3438	1084.75	15.2617	1084.75	15.2617
B FC	386.704	70128.2	1.65956	13.1969	0.813652	1.96364	2.56442	0.188027	2.43191	1110.68	24.8121	1103.13	17.2543	1088.25	16.2863	1088.25	16.2863
B FC	434.362	26176.4	1.73501	13.0175	0.598497	1.92656	1.87631	0.181969	1.7783	1077.72	17.6488	1090.35	12.5424	1115.66	11.9498	1115.66	11.9498
B FC	353.847	36811.8	1.32863	12.7652	0.861918	1.98358	2.64325	0.183723	2.49878	1087.28	25.0013	1109.94	17.8454	1154.58	17.1224	1154.58	17.1224
B FC	608.935	35313	1.53692	13.0465	0.711707	1.99048	1.92787	0.188425	1.79169	1112.84	18.3126	1112.29	13.0301	1111.18	14.2144	1111.18	14.2144
B FC	499.432	639957	1.27187	13.1796	1.01418	1.85262	30.0171	0.177164	30	1051.47	291.256	1064.36	200.51	1090.88	20.2978	1090.88	20.2978
B FC	772.593	206937	2.08062	13.2337	0.801388	1.97425	2.05946	0.18957	1.89715	1119.05	19.4895	1106.76	13.8815	1082.71	16.0538	1082.71	16.0538
B FC	499.432	639957	1.27187	13.1971	1.01418	1.84515	30.0171	0.176685	30	1048.84	290.585	1061.7	200.219	1088.22	20.3067	1088.22	20.3067
B FC	199.218	32374.6	1.70585	12.978	1.3633	2.00662	4.08293	0.188956	3.8486	1115.72	39.4296	1117.75	27.6755	1121.68	27.1769	1121.68	27.1769
B FC	323.9	16010.2	1.56722	13.0676	0.695179	1.96712	2.95979	0.186515	2.87699	1102.47	29.1541	1104.32	19.927	1107.96	13.9108	1107.96	13.9108
B FC	492.372	56717.9	1.24527	13.1628	0.871907	2.05238	2.50611	0.196017	2.34955	1153.89	24.8234	1133.09	17.1116	1093.47	17.4508	1093.47	17.4508
B FC	492.443	56717.9	1.24545	13.165	0.871907	2.05938	2.50042	0.196718	2.34347	1157.67	24.8332	1135.41	17.0917	1093.14	17.4585	1093.14	17.4585
B FC	247.36	58802.1	1.91037	12.9211	1.10972	1.96284	3.15735	0.184024	2.95591	1088.92	29.616	1102.86	21.2419	1130.46	22.1009	1130.46	22.1009
B FC	350.45	30443.2	1.30276	13.0332	0.90611	1.94866	2.54718	0.184278	2.38056	1090.3	23.8792	1097.99	17.0939	1113.23	18.0871	1113.23	18.0871
B FC	320.026	21241.7	1.87602	12.9966	0.858521	1.88768	3.33853	0.178011	3.22625	1056.1	31.428	1076.77	22.1633	1118.87	17.1373	1118.87	17.1373
B FC	908.904	64387.3	1.88229	13.3402	0.716608	1.95545	1.58798	0.189277	1.41709	1117.46	14.5389	1100.32	10.6688	1066.61	14.389	1066.61	14.389
B FC	454.45	59686.1	1.59252	13.2432	0.845187	1.96921	2.88268	0.189223	2.75599	1117.17	28.269	1105.04	19.4147	1081.22	16.9491	1081.22	16.9491
B FC	404.851	39424.7	1.74592	13.0103	0.770119	1.93318	2.70043	0.182493	2.58829	1080.58	25.7502	1092.64	18.0735	1116.77	15.3675	1116.77	15.3675
C FC	572.219	96527.1	1.14587	13.4333	1.01574	2.01195	2.65987	0.196104	2.45829	1154.36	25.9819	1119.55	18.0428	1052.61	20.4833	1052.61	20.4833
C FC	358.196	4.30315e+06	1.48796	13.0958	1.21608	2.09638	3.51809	0.1992	3.30123	1171.02	35.3505	1147.62	24.1899	1103.66	24.3159	1103.66	24.3159
C FC	516.172	70213.7	1.70518	13.0361	1.04425	2.00908	2.91743	0.190035	2.72414	1121.56	28.0429	1118.58	19.781	1112.77	20.8512	1112.77	20.8512
C FC	102.798	18992.4	2.50079	13.0533	1.29921	1.89435	4.97696	0.17942	4.80439	1063.8	47.1158	1079.11	33.087	1110.13	25.9523	1110.13	25.9523
C FC	311.146	875387	1.80217	13.1241	1.41486	2.00344	3.79386	0.19078	3.52016	1125.6	36.3568	1116.67	25.7016	1099.37	28.2949	1099.37	28.2949
C FC	282.237	122585	1.61433	13.0208	0.979322	2.04583	3.03274	0.193284	2.87027	1139.14	29.9706	1130.91	20.6866	1115.15	19.5669	1115.15	19.5669
C FC	126.377	25502.6	2.01353	13.3991	1.49216	1.93497	4.69553	0.188121	4.45213	1111.19	45.4434	1093.26	31.443	1057.75	30.0421	1057.75	30.0421
C FC	354.544	560841	1.78108	13.2952	1.26721	1.9098	3.0524	0.184234	2.77693	1090.06	27.8495	1084.52	20.3448	1073.41	25.4331	1073.41	25.4331
C FC	230.367	44408.4	1.65884	12.9668	1.1128	1.98545	3.77149	0.186801	3.60358	1104.02	36.5645	1110.58	25.4732	1123.41	22.2005	1123.41	22.2005
C FC	283.955	144022	1.58729	13.2742	1.12906	2.03963	3.90713	0.196448	3.74043	1156.21	39.5912	1128.84	26.6267	1076.54	22.6665	1076.54	22.6665
C FC	275.816	325489	1.66783	13.1136	1.36432	2.07916	3.48696	0.197833	3.20897	1163.67	34.1657	1141.96	23.9118	1100.95	27.272	1100.95	27.272
C FC	313.663	271090	1.87692	12.8662	1.45901	2.02197	4.83973	0.188761	4.61457	1114.66	47.2363	1122.92	32.8918	1138.92	29.0404	1138.92	29.0404
C FC	277.049	67240.9	1.87291	13.2311	1.34396	1.97086	4.18423	0.189208	3.96252	1117.09	40.6422	1105.6	28.1923	1083.08	26.9357	1083.08	26.9357
C FC	2063.53	294593	2.70385	12.987	0.976954	2.09516	2.42137	0.197431	2.21554	1161.5	23.5485	1147.22	16.6443	1120.31	19.4748	1120.31	19.4748
C FC	220.109	43328.2	1.94137	13.0263	1.3685	1.86766	6.07059	0.176525	5.91432	1047.96	57.2058	1069.7	40.1659	1114.31	27.3219	1114.31	27.3219
C FC	329.331	79845.2	1.81266	13.0238	1.18704	1.97848	3.15572	0.186964	2.92396	1104.91	29.6902	1108.2	21.2877	1114.7	23.6875	1114.7	23.6875
C FC	1077.1	724432	2.33878	13.0888	1.11421	2.02704	2.99072	0.192509	2.77542	1134.95	28.8827	1124.62	20.338	1104.73	22.2696	1104.73	22.2696
C FC	1684.9	1.50093e+06	1.42674	12.9359	1.14172	2.07421	3.61024	0.194687	3.42495	1146.71	35.9799	1140.32	24.7384	1128.19	22.7466	1128.19	22.7466
C FC	624.567	355186	1.10623	13.274	0.771246	2.01148	3.0328	0.193734	2.9331	1141.57	30.6864	1119.39	20.5716	1076.59	15.4824	1076.59	15.4824
C FC	327.684	67857.6	1.63966	13.1228	1.08339	1.90037	3.44474	0.180947	3.26994	1072.15	32.2985	1081.22	22.9216	1099.57	21.6718	1099.57	21.6718
C FC	310.206	81257.1	1.7068	13.1385	1.37541	2.03308	2.97251	0.193815	2.63516	1142.01	27.5789	1126.65	20.234	1097.15	27.5101	1097.15	27.5101
C FC	393.594	386113	1.72867	13.2091	0.941539	2.02438	2.88887	0.194023	2.73113	1143.13	28.609	1123.73	19.6366	1086.42	18.8741	1086.42	18.8741
C FC	595.735	106164	1.25929	13.0135	1.11567	1.95244	2.28676	0.184357	1.99614	1090.73	20.0302	1099.29	15.3561	1116.28	22.2751	1116.28	22.2751
C FC	306.259	88622	1.76067	13.2869	1.05712	2.04758	2.67201	0.197403	2.454	1161.35	26.08	1131.49	18.2306	1074.65	21.2091	1074.65	21.2091
C FC	324.577	82712.6	1.56147	13.2058	1.34334	2.08291	3.94885	0.199582	3.71333	1173.07	39.8272	1143.19	27.0965	1086.94	26.9275	1086.94	26.9275
C FC	595.134	329098	1.1071	13.164	1.06667	2.06973	3.4215	0.197691	3.25098	1162.9	34.5922	1138.84	23.4281	1093.3	21.3607	1093.3	21.3607
C FC	347.391	78978.2	1.66658	13.3505	0.960701	1.95171	3.17085	0.189061	3.02181	1116.28	30.9731	1099.03	21.2917	1065.05	19.3101	1065.05	19.3101
C FC	560.729	159959	1.18236	13.4762	0.969776	1.9671	3.00177	0.192345	2.8408	1134.07	29.5422	1104.31	20.2097	1046.18	19.5766	1046.18	19.5766
C FC	324.315	99911.4	1.69385	12.8986	1.33867	2.09338	4.4506	0.195921	4.2445	1153.37	44.826	1146.64	30.5911	1133.95	26.6467	1133.95	26.6467
C FC	292.167	109773	1.5855	13.0863	1.31809	2.03783	3.37983	0.193497	3.11221	1140.29	32.527	1128.24	23.0252	1105.09	26.3364	1105.09	26.3364
C FC	478.086	952517	1.37108	13.1377	1.05257	1.9712	2.99952	0.187905	2.80878	1110.01	28.6414	1105.72	20.2087	1097.26	21.0653	1097.26	21.0653
C FC	281.13	77251.6	1.63158	13.1364	1.07907	2.05982	3.11002	0.196333	2.91682	1155.59	30.8583	1135.56	21.2613	1097.48	21.5952	1097.48	21.5952
C FC	335.737	45654.5	1.81106	13.092	1.54117	1.94638	3.29088	0.184893	2.90769	1093.65	29.249	1097.2	22.0775	1104.23	30.8133	1104.23	30.8133
C FC	757.536	101537	1.66747	13.3257	1.04917	1.96845	2.01421	0.190329	1.71939	1123.15	17.7227	1104.78	13.563	1068.79	21.0686	1068.79	21.0686
C FC	265.398	96240.7	1.63983	12.9293	0.941992	2.11297	4.65575	0.198224	4.55945	1165.77	48.6247	1153.05	32.0983	1129.2	18.7788	1129.2	18.7788
C FC	331.203	234905	1.6771	13.1054	0.962798	1.94976	2.63486	0.185404	2.45265	1096.43	24.7292	1098.36	17.6858	1102.18	19.2432	1102.18	19.2432
C FC	355.914	103218	1.77697	12.9667	1.35981	1.92301	2.9039	0.180925	2.56584	1072.03	25.3412	1089.11	19.4006	1123.42	27.1095	1123.42	27.1095
C FC	294.596	89150.5	1.67371	13.2552	1.33655	1.95767	3.20581	0.188285	2.9139	1112.08	29.764	1101.08	21.5488	1079.41	26.8012	1079.41	26.8012
C FC	615.806	151651	1.17278	13.1021	0.935518	1.96968	2.84833	0.187251	2.69031	1106.47	27.353	1105.2	19.1848	1102.68	18.6931	1102.68	18.6931
C FC	395.896	316516	1.82946	13.315	1.09096	2.01903	2.72105	0.195061	2.49277	1148.74	26.2291	1121.93	18.4795	1070.41	21.922	1070.41	21.922
C FC	184.66	48325.9	2.03712	12.9415	1.17615	2.01756	3.60693	0.189452	3.40979	1118.4	35.0107	1121.44	24.4919	1127.34	23.4231	1127.34	23.4231
C FC	322.269	382165	1.57249	13.2858	1.01149	1.9716	2.74107	0.190062	2.54761	1121.71	26.2289	1105.86	18.4683	1074.82	20.2999	1074.82	20.2999
C FC	333.153	37823.3	1.61868	13.3258	0.997867	2.02079	2.82605	0.19539	2.64401	1150.51	27.8598	1122.53	19.1983	1068.78	20.0371	1068.78	20.0371
D FC	940.06	108251	1.73223	13.3059	0.881075	1.94125	2.38655	0.187419	2.21795	1107.38	22.5673	1095.43	15.995	1071.79	17.6819	1071.79	17.6819
D FC	247.927	27943.3	1.53683	13.0781	1.58795	2.00664	3.55721	0.190415	3.18311	1123.62	32.8228	1117.76	24.1106	1106.35	31.732	1106.35	31.732
D FC	555.828	24326.5	1.90298	12.9441	1.07643	1.91869	3.28261	0.180204	3.1011	1068.09	30.5241	1087.61	21.9146	1126.9	21.4564	1126.9	21.4564
D FC	339.829	16902.8	1.73205	13.1707	1.10439	2.02712	3.82215	0.193721	3.65912	1141.5	38.2802	1124.65	25.9946	1092.27	22.1192	1092.27	22.1192
D FC	425.25	23390	1.83351	12.9807	1.26183	1.99214	2.57106	0.187632	2.24012	1108.53	22.8147	1112.85	17.3829	1121.3	25.1636	1121.3	25.1636
D FC	190.674	14103.7	2.01625	13.4541	1.13913	1.88792	3.52581	0.184301	3.33673	1090.43	33.474	1076.85	23.408	1049.49	22.9802	1049.49	22.9802
D FC	466.647	40930.1	1.67732	12.9193	0.765802	2.08193	2.79674	0.195161	2.68985	1149.28	28.315	1142.87	19.1857	1130.72	15.2318	1130.72	15.2318
D FC	295.233	17592.6	1.6518	13.1759	0.961733	2.00931	3.24578	0.192095	3.10003	1132.71	32.2027	1118.66	22.0089	1091.48	19.2457	1091.48	19.2457
D FC	195.66	13113.9	1.82718	13.061	1.46421	2.01393	3.93714	0.190858	3.65475	1126.02	37.7599	1120.22	26.7192	1108.96	29.248	1108.96	29.248
D FC	300.041	16905.6	1.87341	13.0537	0.847818	1.96013	3.23067	0.185654	3.11744	1097.79	31.4677	1101.93	21.7251	1110.08	16.9301	1110.08	16.9301
D FC	424.014	87554.1	1.45184	12.9888	1.06801	1.96358	2.66915	0.185056	2.44617	1094.54	24.6247	1103.11	17.9589	1120.05	21.3116	1120.05	21.3116
D FC	132.188	10999.9	2.07086	12.849	1.22784	1.94019	5.91354	0.180885	5.78466	1071.81	57.1219	1095.07	39.6431	1141.58	24.3947	1141.58	24.3947
D FC	237.692	13961.8	1.70523	13.2676	1.13049	1.92166	3.91037	0.184995	3.74339	1094.2	37.6731	1088.65	26.1211	1077.53	22.6905	1077.53	22.6905
D FC	149.511	7233.49	1.74582	13.5296	1.47084	1.94312	4.36028	0.190753	4.10472	1125.45	42.3894	1096.07	29.2386	1038.17	29.7177	1038.17	29.7177
D FC	197.269	20701.7	1.78329	13.282	1.15583	1.9298	3.85578	0.185979	3.67847	1099.56	37.1857	1091.47	25.7935	1075.36	23.1894	1075.36	23.1894
D FC	236.215	108293	1.54456	12.7515	0.931087	2.03414	3.00999	0.188204	2.86236	1111.64	29.227	1127	20.4927	1156.71	18.4815	1156.71	18.4815
D FC	335.049	57392.6	1.80137	13.1338	1.16213	2.02415	3.68144	0.192894	3.4932	1137.04	36.4136	1123.65	25.025	1097.89	23.2457	1097.89	23.2457
D FC	318.192	41074.6	1.82217	13.1798	1.03828	1.98191	2.7066	0.189532	2.49953	1118.84	25.6735	1109.37	18.268	1090.84	20.7813	1090.84	20.7813
D FC	1351.88	68793.9	1.70746	13.2606	0.964424	1.98593	2.40247	0.19108	2.2004	1127.22	22.7559	1110.74	16.2259	1078.62	19.3353	1078.62	19.3353
D FC	212.939	26552.9	1.57081	12.9538	1.35833	1.97434	3.88676	0.18557	3.64169	1097.33	36.7456	1106.79	26.2027	1125.44	27.0729	1125.44	27.0729
D FC	404.453	20964.7	1.43839	13.259	1.15193	1.95816	3.21358	0.188385	3.00002	1112.62	30.6574	1101.25	21.6028	1078.87	23.1105	1078.87	23.1105
D FC	168.386	18988.9	1.84565	12.8948	1.31567	2.11636	4.94046	0.198012	4.76205	1164.63	50.7401	1154.15	34.0802	1134.54	26.1866	1134.54	26.1866
D FC	832.566	319807	1.57938	13.0044	0.773734	1.9255	2.15148	0.181687	2.00753	1076.18	19.8977	1089.98	14.3793	1117.66	15.4263	1117.66	15.4263
D FC	355.266	25505.5	1.64452	13.3014	1.13922	1.91922	3.80538	0.185229	3.63085	1095.48	36.5795	1087.8	25.4083	1072.47	22.8852	1072.47	22.8852
D FC	741.482	526092	1.49708	13.2775	0.905297	1.93069	2.25273	0.186002	2.06282	1099.68	20.8551	1091.78	15.07	1076.05	18.1731	1076.05	18.1731
D FC	814.09	55963.8	1.44416	13.1687	0.908693	1.99241	2.71304	0.190375	2.55633	1123.4	26.355	1112.94	18.3438	1092.57	18.1799	1092.57	18.1799
D FC	127.246	22058.9	1.93658	13.1832	1.32603	2.02719	4.84408	0.19391	4.65905	1142.52	48.7812	1124.67	32.9494	1090.34	26.5668	1090.34	26.5668
D FC	1133.77	401918	1.37231	13.22	0.770123	2.07031	2.43608	0.198589	2.31115	1167.74	24.685	1139.04	16.6807	1084.76	15.4409	1084.76	15.4409
D FC	308.579	39888.2	1.8153	12.9076	0.989071	2.04333	3.90249	0.191369	3.77507	1128.79	39.0908	1130.07	26.6109	1132.52	19.6912	1132.52	19.6912
D FC	257.312	31332.1	1.77786	12.998	0.835748	2.06004	3.35713	0.194286	3.25143	1144.55	34.0981	1135.63	22.952	1118.65	16.6881	1118.65	16.6881
D FC	276.627	22230.1	1.4811	13.0693	0.901284	1.97351	3.23912	0.187146	3.1112	1105.9	31.6174	1106.51	21.832	1107.69	18.0284	1107.69	18.0284
D FC	557.501	79939	1.41617	13.0431	1.05188	1.98025	2.85175	0.187408	2.65066	1107.32	26.9689	1108.8	19.2424	1111.7	21.0079	1111.7	21.0079
D FC	735.797	120046	1.6682	13.3502	1.01029	2.0442	2.58077	0.198015	2.3748	1164.65	25.3036	1130.36	17.5983	1065.1	20.3167	1065.1	20.3167
D FC	452.803	19014.9	1.76837	13.2165	1.14003	1.97211	2.86512	0.189119	2.62855	1116.6	26.9492	1106.03	19.306	1085.28	22.8392	1085.28	22.8392
D FC	730.866	367193	1.70858	12.9871	1.1308	2.05181	3.00563	0.193347	2.7848	1139.48	29.0861	1132.9	20.5213	1120.29	22.5699	1120.29	22.5699
D FC	738.648	224004	1.6702	13.1574	0.753204	1.99787	2.7108	0.190732	2.60406	1125.34	26.8895	1114.79	18.3455	1094.29	15.0685	1094.29	15.0685
D FC	213.259	67193.7	1.61167	12.8711	1.02662	2.01438	3.91918	0.188124	3.78233	1111.21	38.607	1120.37	26.5992	1138.18	20.4043	1138.18	20.4043
E FC	406.373	4.29682e+06	1.78511	12.8674	0.891136	1.97764	2.94898	0.184641	2.81111	1092.28	28.2448	1107.92	19.8899	1138.73	17.7226	1138.73	17.7226
E FC	924.693	44181.6	1.35843	13.2144	0.78522	1.98986	1.75852	0.190791	1.57348	1125.66	16.2518	1112.07	11.8842	1085.63	15.7228	1085.63	15.7228
E FC	616.979	125283	1.74753	13.1649	0.889286	1.99161	2.36642	0.190243	2.19297	1122.69	22.5957	1112.67	15.9977	1093.15	17.79	1093.15	17.79
E FC	321.94	757327	1.5725	13.1547	0.79356	1.91022	3.65383	0.182328	3.56661	1079.68	35.4563	1084.66	24.3567	1094.69	15.8883	1094.69	15.8883
E FC	206.424	19051.2	2.92636	13.037	0.947767	2.02242	4.31038	0.19131	4.20489	1128.47	43.5303	1123.07	29.2942	1112.64	18.9084	1112.64	18.9084
E FC	490.562	29980.4	1.7118	13.1973	1.00258	1.95874	2.75661	0.187564	2.56783	1108.17	26.1444	1101.45	18.5321	1088.19	20.0741	1088.19	20.0741
E FC	342.826	31148.2	1.88976	13.03	0.94474	1.93657	2.94657	0.18309	2.79101	1083.83	27.8439	1093.81	19.7331	1113.74	18.8427	1113.74	18.8427
E FC	465.469	35103.6	1.46132	13.1514	0.875432	1.98398	2.3989	0.18932	2.23346	1117.69	22.919	1110.08	16.1965	1095.19	17.5263	1095.19	17.5263
E FC	282.529	14602.6	2.32468	12.987	1.00705	1.91691	3.20641	0.180633	3.04416	1070.43	30.0242	1086.99	21.3989	1120.31	20.0847	1120.31	20.0847
E FC	338.292	196509	1.92076	12.7692	0.696387	1.94929	2.57865	0.180604	2.48283	1070.27	24.4845	1098.2	17.307	1153.96	13.8019	1153.96	13.8019
E FC	593.491	44000.9	1.46259	13.2371	0.657156	1.98279	2.14404	0.19044	2.04085	1123.76	21.0465	1109.67	14.4726	1082.18	13.1697	1082.18	13.1697
E FC	192.888	12058.9	2.75761	12.9495	1.13114	1.91959	3.64611	0.180363	3.46621	1068.96	34.1436	1087.92	24.3461	1126.11	22.5423	1126.11	22.5423
E FC	728.088	62472.5	1.51385	13.2149	0.779569	2.03405	1.85766	0.195036	1.68617	1148.6	17.7401	1126.97	12.6461	1085.55	15.6292	1085.55	15.6292
E FC	330.657	647724	1.55708	12.9476	0.869432	1.93461	3.51122	0.181747	3.40188	1076.51	33.7275	1093.13	23.5076	1126.38	17.3403	1126.38	17.3403
E FC	508.761	37648.7	1.54473	13.0797	0.770614	1.98484	2.51947	0.188369	2.39872	1112.53	24.5109	1110.37	17.0131	1106.11	15.4032	1106.11	15.4032
E FC	295.429	38178.8	1.74942	13.1586	0.821438	1.94643	3.04526	0.185838	2.93238	1098.79	29.6245	1097.22	20.4294	1094.08	16.448	1094.08	16.448
E FC	272.519	40341.6	2.07186	13.0581	0.95392	2.00313	3.83866	0.189791	3.71824	1120.24	38.2354	1116.57	26.0039	1109.41	19.0578	1109.41	19.0578
E FC	371.521	39897.1	1.77535	12.9983	0.879856	1.88898	2.70868	0.178156	2.56179	1056.89	24.9725	1077.22	17.9852	1118.61	17.5623	1118.61	17.5623
E FC	417.389	41835.9	1.89919	13.1284	0.880296	1.89124	2.55352	0.180156	2.39698	1067.82	23.5881	1078.02	16.9618	1098.67	17.6321	1098.67	17.6321
E FC	391.02	264817	1.87927	12.9432	0.929219	1.9723	2.68921	0.185226	2.52357	1095.46	25.4236	1106.09	18.121	1127.07	18.5278	1127.07	18.5278
E FC	364.493	41242.1	1.52021	13.1019	1.08497	1.98969	3.37391	0.189151	3.1947	1116.77	32.7584	1112.02	22.8032	1102.71	21.6971	1102.71	21.6971
E FC	475.46	54807	1.61588	13.1917	0.868753	1.9659	2.56654	0.188169	2.41504	1111.45	24.6555	1103.9	17.2753	1089.05	17.3899	1089.05	17.3899
E FC	242.413	21336.4	1.90255	12.8841	1.22635	1.98059	3.21077	0.185156	2.96734	1095.08	29.8849	1108.92	21.667	1136.18	24.4025	1136.18	24.4025
E FC	264.135	34262.7	2.45502	12.976	0.953943	1.93073	3.23134	0.181781	3.08733	1076.7	30.6136	1091.79	21.6184	1122.04	19.0121	1122.04	19.0121
E FC	349.505	8.06979e+07	1.55316	13.128	0.892823	1.94347	2.5396	0.185125	2.37749	1094.91	23.9408	1096.2	17.0276	1098.74	17.883	1098.74	17.883
F FC	209.766	255456	1.63801	13.3765	1.30913	1.93676	3.46472	0.187977	3.20788	1110.4	32.7217	1093.88	23.205	1061.15	26.3433	1061.15	26.3433
F FC	983.118	127125	2.2155	13.2558	0.889392	1.99323	2.62295	0.191713	2.46756	1130.65	25.5899	1113.22	17.7371	1079.32	17.8289	1079.32	17.8289
F FC	578.255	224567	1.53872	13.1776	1.05473	2.04954	3.30764	0.195966	3.13497	1153.61	33.1145	1132.14	22.5758	1091.22	21.1089	1091.22	21.1089
F FC	325.674	128239	2.26266	13.1741	1.20121	1.95336	3.14353	0.18672	2.90498	1103.58	29.4651	1099.6	21.1143	1091.75	24.0603	1091.75	24.0603
F FC	546.626	159788	1.669	13.2259	1.1875	1.95051	3.18783	0.18718	2.9584	1106.08	30.0691	1098.62	21.4013	1083.86	23.7948	1083.86	23.7948
F FC	426.624	629648	1.58855	13.1061	1.28003	1.96952	3.04601	0.187293	2.764	1106.7	28.1076	1105.14	20.5161	1102.09	25.5928	1102.09	25.5928
F FC	511.631	152644	1.73985	13.0352	1.10486	1.95996	3.81518	0.185376	3.65169	1096.28	36.8141	1101.87	25.6566	1112.91	22.0795	1112.91	22.0795
F FC	192.332	137030	2.11231	12.8159	1.59302	2.10391	4.18511	0.195643	3.87007	1151.87	40.823	1150.09	28.8119	1146.75	31.6508	1146.75	31.6508
F FC	1180.47	508801	1.53609	13.3632	0.978678	1.96764	2.16169	0.190785	1.92746	1125.63	19.9075	1104.5	14.5542	1063.15	19.6767	1063.15	19.6767
F FC	254.651	59107.3	2.70394	13.131	1.0823	2.00424	3.81205	0.190956	3.65519	1126.55	37.7808	1116.95	25.8284	1098.29	21.6591	1098.29	21.6591
F FC	714.361	199415	1.53721	13.0702	0.878037	1.97627	2.47592	0.187419	2.315	1107.38	23.5549	1107.45	16.6947	1107.56	17.5463	1107.56	17.5463
F FC	175.601	139490	2.51924	13.2376	1.18491	1.98078	4.70563	0.190254	4.55401	1122.75	46.926	1108.99	31.7611	1082.12	23.7494	1082.12	23.7494
F FC	241.298	137923	2.10717	13.0265	1.26733	1.9766	4.46588	0.186825	4.28229	1104.15	43.456	1107.56	30.1206	1114.28	25.3083	1114.28	25.3083
F FC	739.594	408928	1.5432	13.2416	0.935801	1.99022	2.5862	0.191219	2.41095	1127.97	24.9487	1112.2	17.4796	1081.46	18.7724	1081.46	18.7724
F FC	111.711	3.40045e+07	2.37531	13.0275	1.34246	1.99308	5.62465	0.188397	5.46209	1112.68	55.8213	1113.17	38.0483	1114.13	26.798	1114.13	26.798
F FC	244.453	62548.6	1.45718	12.9356	1.46159	2.06895	4.19898	0.194189	3.93639	1144.03	41.2643	1138.58	28.7508	1128.22	29.1185	1128.22	29.1185
F FC	576.685	615354	2.01449	13.1318	1.06523	1.96087	3.22328	0.186837	3.04217	1104.22	30.8729	1102.18	21.6782	1098.19	21.3033	1098.19	21.3033
F FC	294.584	52310.4	1.76348	13.1484	1.15423	1.90339	3.08918	0.181589	2.86544	1075.65	28.3881	1082.28	20.5662	1095.62	23.1053	1095.62	23.1053
F FC	194.503	26663.1	1.65956	13.2278	1.31182	1.92669	4.07068	0.184922	3.85351	1093.81	38.7684	1090.39	27.2167	1083.58	26.2888	1083.58	26.2888
F FC	254.306	112852	1.57024	12.962	1.61222	1.96041	3.9073	0.184377	3.55918	1090.84	35.7182	1102.02	26.2784	1124.16	32.1198	1124.16	32.1198
G-H FC	707.417	166218	2.34562	13.1072	0.779368	1.97903	1.70399	0.188213	1.51531	1111.69	15.4731	1108.39	11.4946	1101.93	15.6054	1101.93	15.6054
G-H FC	252.105	48960.3	1.92197	12.8037	1.13336	1.94151	3.14251	0.180369	2.93101	1068.99	28.8724	1095.52	21.0638	1148.61	22.5104	1148.61	22.5104
G-H FC	322.787	17106.9	1.94646	13.0968	0.928394	1.95754	2.98829	0.186022	2.84041	1099.79	28.7193	1101.04	20.0858	1103.52	18.5821	1103.52	18.5821
G-H FC	412.368	21821.9	1.52199	13.2203	0.974997	1.95835	2.68984	0.187853	2.50691	1109.74	25.5573	1101.32	18.0818	1084.73	19.5504	1084.73	19.5504
G-H FC	526.41	314038	1.68596	12.9855	0.945637	2.06161	2.71767	0.194247	2.54784	1144.34	26.7148	1136.15	18.5837	1120.55	18.8788	1120.55	18.8788
G-H FC	177.548	95101.2	2.69651	12.98	0.943435	1.99593	3.67309	0.187978	3.54986	1110.41	36.2104	1114.13	24.852	1121.38	18.8239	1121.38	18.8239
G-H FC	501.372	38120.3	1.49304	13.0674	0.794503	1.91992	2.07564	0.182037	1.91757	1078.09	19.037	1088.04	13.8587	1107.98	15.8566	1107.98	15.8566
G-H FC	483.422	34992.4	3.20535	13.0818	0.85949	1.98318	2.37494	0.188243	2.21396	1111.85	22.6101	1109.8	16.0325	1105.78	17.1874	1105.78	17.1874
G-H FC	499.795	32786.4	1.20369	13.017	0.7815	2.00886	2.34407	0.189735	2.20996	1119.94	22.7197	1118.51	15.8922	1115.75	15.5794	1115.75	15.5794
G-H FC	268.546	141529	2.25335	12.8856	1.36498	1.94955	3.14105	0.182275	2.82896	1079.39	28.1162	1098.29	21.0837	1135.96	27.1636	1135.96	27.1636
G-H FC	276.31	130719	2.06125	12.9334	0.967526	2.0053	2.87262	0.188182	2.70478	1111.52	27.6152	1117.3	19.4649	1128.55	19.2928	1128.55	19.2928
G-H FC	368.403	45302.9	1.60283	12.9561	1.02978	2.05011	2.17158	0.192725	1.91189	1136.12	19.915	1132.33	14.8217	1125.06	20.5331	1125.06	20.5331
G-H FC	919.384	56638.1	1.78971	13.2501	0.786722	2.00591	2.53969	0.19285	2.41477	1136.79	25.1668	1117.51	17.2103	1080.19	15.7843	1080.19	15.7843
G-H FC	176.225	21951.8	2.3543	13.0574	1.38789	1.98535	7.54777	0.188096	7.41907	1111.05	75.721	1110.54	51.01	1109.51	27.7259	1109.51	27.7259
G-H FC	247.19	50549.6	1.89324	12.8956	1.27732	1.91104	3.63623	0.178812	3.4045	1060.48	33.2911	1084.95	24.243	1134.42	25.4238	1134.42	25.4238
G-H FC	408.124	34777.4	1.60277	13.0029	1.09009	1.97031	2.39014	0.185893	2.12708	1099.09	21.4942	1105.41	16.0999	1117.9	21.7421	1117.9	21.7421
G-H FC	706.163	67194	1.62693	13.2249	0.648017	1.98343	1.82123	0.190325	1.70204	1123.14	17.5436	1109.89	12.2947	1084.05	12.9934	1084.05	12.9934
G-H FC	293.631	208461	1.85381	12.9027	0.710007	2.04418	2.82275	0.191376	2.732	1128.82	28.2904	1130.36	19.2488	1133.28	14.1279	1133.28	14.1279
G-H FC	262.779	55831.3	1.82496	12.8955	0.956939	1.95075	3.11311	0.182528	2.96238	1080.77	29.4767	1098.7	20.9004	1134.42	19.0287	1134.42	19.0287
G-H FC	516.699	49678.6	1.46291	13.063	0.950836	2.0114	2.38266	0.190646	2.18471	1124.87	22.5507	1119.36	16.1606	1108.66	19.0078	1108.66	19.0078
G-H FC	317.199	48510.8	1.843	12.9872	1.00606	2.00587	2.55453	0.189019	2.34808	1116.06	24.063	1117.5	17.3107	1120.27	20.0473	1120.27	20.0473
G-H FC	238.003	60645.7	2.16359	12.8713	1.22458	2.06327	2.80994	0.192694	2.52907	1135.95	26.3402	1136.71	19.2198	1138.15	24.3422	1138.15	24.3422
G-H FC	691.285	179293	1.64832	13.1016	0.676367	2.02806	1.89244	0.192793	1.76744	1136.49	18.4158	1124.97	12.8704	1102.77	13.5437	1102.77	13.5437
G-H FC	535.888	121276	1.48652	13.0308	0.869396	2.01026	2.56361	0.190069	2.41169	1121.75	24.8302	1118.98	17.3849	1113.62	17.3435	1113.62	17.3435
G-H FC	275.447	39864	1.74742	12.8394	0.82053	1.9473	2.53372	0.181412	2.39717	1074.69	23.7293	1097.52	16.9995	1143.1	16.2997	1143.1	16.2997
G-H FC	247.004	19065.3	1.71469	12.908	1.43082	1.90006	3.36821	0.177957	3.0492	1055.8	29.6957	1081.11	22.411	1132.46	28.4765	1132.46	28.4765
G-H FC	526.39	57548	1.63221	13.1965	0.767483	2.07712	2.09274	0.198887	1.94693	1169.34	20.8208	1141.28	14.3447	1088.32	15.3778	1088.32	15.3778
G-H FC	291.308	39149.8	2.03279	12.9587	0.867581	1.99525	2.30982	0.187607	2.1407	1108.4	21.7997	1113.9	15.6245	1124.65	17.2929	1124.65	17.2929
G-H FC	620.547	132678	1.34136	13.1921	0.899534	2.04142	2.51476	0.195405	2.34838	1150.59	24.7462	1129.44	17.1405	1088.98	18.0062	1088.98	18.0062
G-H FC	393.133	29358	1.92657	13.1333	0.877198	2.03277	2.84121	0.19371	2.7024	1141.44	28.2699	1126.54	19.339	1097.94	17.5713	1097.94	17.5713
G-H FC	421.893	130142	1.94168	13.0275	1.04959	1.94865	2.65455	0.184197	2.43824	1089.86	24.4487	1097.98	17.8146	1114.12	20.953	1114.12	20.953
G-H FC	813.68	74417.4	2.10488	13.1449	0.788831	2.05531	2.07128	0.196029	1.91519	1153.95	20.2353	1134.06	14.1488	1096.2	15.7887	1096.2	15.7887
G-H FC	463.081	28480	1.73065	12.9947	1.12685	1.92287	3.05878	0.181302	2.84365	1074.08	28.1345	1089.07	20.4351	1119.16	22.4779	1119.16	22.4779
G-H FC	505.477	31056.9	1.58043	13.0191	0.934924	2.00988	2.7664	0.189863	2.60363	1120.63	26.782	1118.85	18.7592	1115.41	18.6667	1115.41	18.6667
G-H FC	154.263	12522.4	3.01646	12.9763	1.385	1.94647	5.25122	0.183268	5.06528	1084.8	50.5748	1097.23	35.2379	1121.98	27.6176	1121.98	27.6176
G-H FC	452.303	115709	1.40933	13.0674	0.80917	1.9935	2.29272	0.189014	2.14518	1116.03	21.9832	1113.31	15.5043	1107.98	16.1501	1107.98	16.1501
G-H FC	419.495	63764.8	2.89038	13.2281	1.2708	1.94858	2.64102	0.187027	2.31518	1105.25	23.5151	1097.96	17.7236	1083.54	25.4673	1083.54	25.4673
G-H FC	246.397	62118.5	2.52617	13.0602	0.928638	1.91968	3.32686	0.181915	3.19463	1077.43	31.6974	1087.96	22.214	1109.08	18.5653	1109.08	18.5653
G-H FC	533.466	280821	1.12111	12.988	1.02616	2.0359	2.28305	0.191861	2.03944	1131.45	21.1637	1127.59	15.547	1120.17	20.4499	1120.17	20.4499
G-H FC	292.501	95845	1.80541	13.0257	1.01814	2.09412	3.09485	0.197921	2.92258	1164.14	31.128	1146.88	21.2715	1114.4	20.3339	1114.4	20.3339
G-H FC	492.94	36263.4	1.45354	13.1032	0.935745	1.98186	3.21454	0.188425	3.07533	1112.84	31.4326	1109.35	21.6971	1102.52	18.7281	1102.52	18.7281
G-H FC	198.398	12860	2.41896	12.9648	1.28111	1.93046	3.6042	0.1816	3.36883	1075.71	33.3769	1091.7	24.1127	1123.72	25.5366	1123.72	25.5366
G-H FC	605.665	90647.4	1.52761	13.0536	0.832494	2.02083	1.95841	0.191402	1.77266	1128.96	18.3583	1122.54	13.3033	1110.1	16.6418	1110.1	16.6418
G-H FC	854.123	322562	1.69273	13.0917	0.62467	2.01724	2.3176	0.19162	2.23182	1130.14	23.1357	1121.33	15.7344	1104.28	12.4877	1104.28	12.4877
Black, L. P., Kamo, S. L., Allen, C. M., Davis, D. W., Aleinikoff, J. N., Valley, J. W., ... & Foudoulis, C. (2004). Improved 206Pb/238U microprobe geochronology by the monitoring of a trace-element-related matrix effect; SHRIMP, ID–TIMS, ELA–ICP–MS and oxygen isotope documentation for a series of zircon standards. Chemical Geology, 205(1-2), 115-140.
Pullen, A., Ibáñez‐Mejia, M., Gehrels, G. E., Giesler, D., & Pecha, M. (2018). Optimization of a laser ablation‐single collector‐inductively coupled plasma‐mass spectrometer (Thermo Element 2) for accurate, precise, and efficient zircon U‐Th‐Pb geochronology. Geochemistry, Geophysics, Geosystems, 19(10), 3689-3705.

## Sheet: S3 XRF data
Supplementary Table 3
XRF analyses of bulk-rock samples
Sample:	SNB-17-2	SNB-17-1	SNB-17-19	SNB-17-22	SNB-17-23	SNB-17-24	SNB-18-23	SNB-18-24	SNB-18-25	SNB-18-26	SNB-18-28	SNB-18-33A	SNB-18-34A	SNB-18-34B	SNB-18-35	SNB-18-36	SNB-18-39	SNB-18-40	SNB-18-43	SNB-18-44	SNB-19-23	SNB-19-25	SNB-19-26	SNB-19-27	SNB-19-11	SNB-19-12	SNB-19-13	SNB-19-14	SNB-19-05	SNB-19-06	SNB-19-07	SNB-19-08	SNB-19-09	SNB-19-41	SNB-19-42	SNB-19-43	SNB-19-45	SNB-19-47	SNB-19-44A	SNB-19-44B	SNB-17-5	SNB-17-6	SNB-17-7	SNB-17-8	SNB-18-49	SNB-18-50	SNB-18-53	SNB-18-54B	SNB-18-55A
Mafic Body:	Armstrong Canyon	Armstrong Canyon	Bishop Creek	Bishop Creek	Bishop Creek	Bishop Creek	Bishop Creek	Bishop Creek	Bishop Creek	Bishop Creek	Bishop Creek	Bishop Creek	Bishop Creek	Bishop Creek	Bishop Creek	Bishop Creek	Bishop Creek	Bishop Creek	Bishop Creek	Bishop Creek	Black Canyon	Black Canyon	Black Canyon	Black Canyon	Cargyle Meadows	Cargyle Meadows	Cargyle Meadows	Cargyle Meadows	Casa Diablo	Casa Diablo	Casa Diablo	Casa Diablo	Casa Diablo	Green Lake	Green Lake	Green Lake	Green Lake	Green Lake	Green Lake	Green Lake	Keough	Keough	Keough	Keough	Keough	Keough	Keough	Keough	Keough
Rock type:	coarse-grained bt+amph diorite	fine-grained bt+amph diorite with minor qtz	bt diorite	bt gabbro	bt gabbro	bt gabbro-diorite-fine grained	bt gabbro	bt diorite dike	bt diorite	bt gabbro to diorite	bt gabbro to diorite	qtz diorite	bt gabbro to diorite	bt gabbro to diorite	bt gabbro to diorite dike	bt gabbro to diorite dike	amphibole gabbro	bt gabbro dike	porphyritic gabbronorite	porphyritic gabbronorite	weakly foliated bt-diorite	amph+bt norite	dark amph-bt-diorite	pillowy diorite with felsic septa	plag-hornblendite, minor cpx	coarse amph-diorite, light colored plag	fine grained bt-amph-diorite	light amph-gabbro, poikilitic amph	amph-gabbro, minor bt	amphibole-olivine websterite	olivine gabbro	medium grained amph-gabbro	foliated amph-gabbro	acicular amph, interstitial plag	porphyritic amph-gabbro	amph-bt diorite	pillowy amph-bt-diorite	fine grained bt-rich mafic pillow	amph-gabbro	pyroxenite xenolith from 44A	amphibole gabbro	amphibole gabbro	bt-amph qtz-gabbro	amphibole cumulate	cpx amph gabbro	cpx amph cumulate	biotite diorite	porphyritic gabbro(norite)	bt-amph qtz-gabbro
melt-like (M) or geochron (G):	M		M	M			G	M	M			M	M						M		G		M	M	M			G				G				M, G	M								M		G		M
Latitude:	36.9565	36.9579	37.2406	37.2459	37.2457	37.2446	37.2417	37.2418	37.2424	37.244	37.2425	37.2415	37.2415	37.2415	37.2402	37.2402	37.2492	37.2459	37.2322	37.2328	36.8707	36.8735	36.8735	36.8749	37.5704	37.5703	37.5705	37.5719	37.5495	37.5495	37.5501	37.5501	37.5569	37.1721	37.1712	37.1711	37.1716	37.1666	37.1719	37.1719	37.2516	37.2518	37.2525	37.2524	37.2553	37.2554	37.2549	37.2557	37.2563
Longitude:	-118.344	-118.344	-118.557	-118.558	-118.557	-118.556	-118.556	-118.556	-118.556	-118.553	-118.55	-118.549	-118.549	-118.549	-118.547	-118.547	-118.563	-118.558	-118.552	-118.555	-118.304	-118.293	-118.293	-118.29	-119.155	-119.155	-119.155	-119.156	-118.707	-118.707	-118.707	-118.707	-118.707	-118.523	-118.525	-118.529	-118.53	-118.529	-118.531	-118.531	-118.378	-118.378	-118.379	-118.378	-118.391	-118.391	-118.396	-118.398	-118.402
wt.%
SiO2	52.0494	47.3723	57.47	52.57	53.76	56.8	54.77	58.44	58.08	56.09	56.1	62.9	55.84	54.74	55.82	55.04	52.97	51.65	52.81	51.38	67.2079	44.8221	58.3239	53.1337	46.0152	46.9278	46.4782	47.901	44.1117	39.0752	43.9574	49.0904	43.3719	42.1888	49.4974	55.7475	51.3845	55.3248	50.5701	44.3357	44.5	44.78	53.63	44	43.78	43.92	54.79	48.18	47.93
TiO2	1.21853	1.15497	0.87	0.86	0.73	0.75	0.87	0.72	0.73	0.72	0.93	0.71	0.8	0.8	0.81	0.81	1.06	0.95	0.87	0.8	0.404022	1.63504	0.999207	0.958211	0.637518	1.08021	1.7154	0.828771	1.10227	0.19411	0.989149	0.798874	1.34919	2.01031	0.734412	0.939231	1.18775	0.931437	0.820586	0.756823	1.25	1.08	0.89	1.85	1.45	1.54	0.8	1.03	1.44
Al2O3	16.8719	18.9804	17.36	18.6	18.23	17.24	17.46	17.14	17.35	17.62	17.04	16.84	17.75	17.61	17.79	17.89	17.35	18.85	17.78	17.56	15.4364	18.9621	17.1615	16.792	11.1746	14.2376	18.7654	17.2108	19.6444	8.29154	14.6065	16.5097	20.3002	17.8811	13.1218	15.9877	18.4972	17.3015	12.5002	9.38537	19.09	21.5	19.09	16.81	13.03	15.25	19.94	16.69	17.4
FeO*	8.82131	9.84666	6.94792	8.28891	7.60492	6.93892	7.76691	6.56093	6.70493	7.28092	7.31692	4.95894	7.59592	7.63192	8.00091	7.92891	8.6309	8.9549	8.13591	7.96491	3.84119	11.1904	6.4346	7.97381	11.4346	9.8396	11.258	8.96296	11.0327	16.9925	12.0753	10.5252	10.5339	12.9977	7.38756	7.10855	9.45107	7.15102	8.77218	12.4194	10.1609	9.1799	7.60492	9.0269	11.4569	11.1509	6.04793	10.2959	10.3499
MnO	0.136378	0.164899	0.14	0.16	0.15	0.13	0.14	0.13	0.13	0.14	0.13	0.11	0.14	0.14	0.15	0.15	0.16	0.17	0.14	0.15	1.44393	0.151503	0.119843	0.186149	0.15959	0.126909	0.121268	0.144443	0.131494	0.250748	0.194272	0.193107	0.114176	0.114223	0.15394	0.161888	0.191044	0.129676	0.190622	0.258591	0.12	0.1	0.13	0.11	0.17	0.15	0.1	0.16	0.16
MgO	4.83267	4.63567	3.28	4.78	4.52	3.65	3.97	2.73	2.79	3.89	3.72	1.89	3.92	3.9	3.79	3.81	3.85	4.92	5.39	5.8	3.55658	6.121	3.13781	5.3311	16.117	12.1124	5.62061	8.48011	7.30603	26.2748	11.6311	7.7595	7.09017	8.15599	11.2883	5.6443	4.01053	4.62643	10.7098	17.5415	6.47	5.38	3.76	10.25	13.23	10.76	2.97	8.28	6.51
CaO	7.25986	8.57678	6.78	9.32	8.25	7.16	7.5	6	6.16	7.5	7.11	4.65	7.3	7.48	7.6	7.55	7.64	8.87	9.24	9.47	3.472	11.6163	5.82722	8.08683	7.26965	9.12251	9.36537	11.6896	12.3858	5.55134	12.5305	10.0223	12.9904	11.1596	13.3288	7.02244	7.01421	6.90593	10.3025	8.43958	12.98	13.44	7.11	11.83	11.28	11.73	7.72	10.86	10.14
Na2O	2.81297	3.28212	3.22	3.14	3	2.86	3.02	3.22	3.28	2.93	2.95	3.51	2.93	2.99	2.87	2.95	2.88	3.06	2.67	2.24	3.69093	2.38138	3.49872	3.27397	0.739716	1.6874	2.72364	1.6388	1.54773	0.122181	1.04438	1.29473	1.53614	1.79266	1.55064	2.87516	3.9171	3.12165	1.76288	0.0286314	1.85	1.97	3.41	1.92	1.56	1.82	3.45	2.25	2.41
K2O	1.97628	1.76357	1.91	0.74	1.42	2.11	1.93	2.35	2.21	1.91	2.35	2.99	1.89	1.74	1.86	1.82	1.89	0.84	1.13	1.3	0.154245	0.617834	3.18156	2.03434	2.19287	1.52189	1.23604	0.666964	0.509654	0.063061	0.316567	1.08517	0.498527	0.927986	0.477121	2.36789	1.98986	2.20311	1.32511	0.655659	0.63	0.48	1.87	0.98	0.6	0.61	1.9	0.48	0.94
P2O5	0.236799	0.458429	0.29	0.24	0.17	0.18	0.26	0.24	0.24	0.14	0.22	0.23	0.21	0.22	0.2	0.21	0.38	0.25	0.19	0.17	0.0716933	0.498221	0.296282	0.239801	0.13529	0.112624	0.247604	0.141088	0.136303	0.0374425	0.106509	0.153478	0.132545	0.120698	0.16857	0.225891	0.445284	0.230131	0.209073	0.144111	0.08	0.11	0.37	0.03	0.06	0.06	0.3	0.2	0.42
LOI	1.31405	1.18285	0.71	0.24	0.96	0.8	0.8	0.99	0.72	0.62	0.57	0.7	0.77	1.17	0.01	0.82	1.36	0.4	0.34	1.27	0.486148	1.15118	0.578016	0.907141	2.6642	2.06514	0.956034	1.33682	1.23452	1.4705	1.38361	1.62028	1.08788	1.06621	1.42057	0.923123	0.604839	0.801637	1.84361	4.55779	1.49	0.86	0.78	1.89	2.08	1.64	1.2	0.24	1.05
Sum	97.5301	97.4186	97.9779	98.4589	97.6649	97.6389	97.4269	97.2909	97.4349	98.0809	97.6469	98.5589	98.1659	97.0319	98.6909	97.9489	96.4309	98.2649	98.1659	96.6649	99.765	99.147	99.5586	98.917	98.5402	98.8341	98.4876	99.0014	99.1426	98.3234	98.8353	99.0528	99.005	98.4152	99.1292	99.0038	98.6934	98.7273	99.0066	98.5231	97.0509	97.9099	97.4949	96.7769	96.5569	96.9309	97.7179	98.2259	97.2799
Mg#	49.4065	45.6281	45.6964	50.6888	51.4433	48.3908	47.6748	42.5851	42.5858	48.7798	47.5411	40.4539	47.914	47.6684	45.7811	46.1363	44.2938	49.4785	54.1476	56.4843	62.2706	49.3675	46.5024	54.3744	71.53	68.6939	47.088	62.7768	54.1372	73.3776	63.1941	56.7873	54.5409	52.7973	73.1451	58.5982	43.0656	53.558	68.5164	71.5723	53.1623	51.0924	46.8455	66.9317	67.3031	63.2358	46.6768	58.9072	52.8567
ppm
Rb	65.994	47.808	45.5986	37.2596	58.295	69.04	51.2076	71.9379	66.9955	56.1553	65.4321	93.355	59.1425	47.8889	56.3331	55.9604	49.1738	14.8792	25.7307	14.1509	96.177	21.526	116.395	89.971	101.004	73.082	35.549	22.146	6.769	-	4.683	48.157	4.927	16.359	7.972	79.785	67.507	86.632	46.728	26.326	8.94118	5.63763	55.1798	21.7152	7.31842	5.64631	57.8203	6.08329	41.6109
Ba	804.708	916.615	1002.73	621.392	472.77	835.158	968.163	924.638	952.679	724.389	935.167	1316.67	838.764	836.956	0.817329	0.82784	807.108	708.398	538.072	621.995	913.109	256.782	915.429	567.754	413.553	374.043	583.338	308.244	285.407	42.171	181.89	374.807	254.341	354.56	180.052	723.352	857.717	606.764	336.375	172.135	261.551	223.772	975.765	328.737	253.637	254.278	879.888	344.208	930.493
Sr	728.729	895.815	501.226	537.869	502.106	468.54	505.39	509.515	513.062	497.066	466.34	440.705	482.596	506.332	17.952	18.1832	550.846	564.046	497.489	605.052	517.312	929.808	546.841	512.444	322.869	682.43	891.179	792.637	727.776	245.984	530.323	591.913	714.558	720.446	410.847	581.583	681.444	630.396	415.619	83.33	768.646	872.082	763.847	609.449	460.527	573.446	887.269	777.196	721.966
Nb	7.32	7.034	9.78158	5.63343	5.60026	9.01684	9.11288	11.6128	9.44939	4.93838	9.23064	11.9734	6.42893	7.92761	8.97245	8.96003	10.0083	2.73957	6.11625	3.84666	8.788	-	10.812	6.165	2.568	4.766	5.115	2.359	2.181	-	2.45	3.325	2.644	2.738	3.075	5.422	9.334	4.979	4.237	6.002	2.79784	1.24523	8.70289	5.05567	1.95902	2.09203	7.03304	-	7.50621
Zr	133.37	234.535	157.724	149.152	123.763	163.696	169.092	190.942	179.771	158.386	162.572	230.645	156.871	157.567	152	150	161.43	103.228	117.896	102.433	123.599	99.848	240.21	153.409	71.25	97.59	153.187	102.923	89.249	11.811	64.062	84.052	87.019	105.884	74.725	135.605	228.909	148.523	87.161	44.718	113.056	110.134	210.743	103.148	82.5877	91.6323	196.484	91.7898	181.909
Hf	3.64	6.882	3.73473	3.67637	2.55119	3.67428	3.91909	5.22422	4.87842	3.63469	3.47449	5.79537	3.50761	4.34859	8.07512	8.06394	4.3208	2.89256	2.46132	1.80097	2.456	3.162	6.461	4.409	2.005	2.994	3.678	2.615	2.581	-	2.11	2.934	2.242	3.435	2.159	3.898	5.853	3.519	1.901	1.422	2.45466	2.55562	4.55832	2.7314	1.99518	3.16016	5.19311	2.54425	5.12294
Y	18.202	20.425	26.204	17.8808	19.5829	22.6089	25.1569	23.9848	24.5433	23.687	25.9108	32.5904	21.8267	21.6465	-	-	39.0098	18.5934	16.9075	20.015	18.822	16.64	25.599	19.285	9.737	13.027	13.406	10.854	13.075	2.977	15.613	13.189	14.381	14.623	14.481	17.326	28.625	15.88	16.944	12.426	13.3368	11.6795	17.9316	20.6742	16.4057	16.4584	15.7778	10.4356	18.6024
Zn	107.55	131.407	90.8215	83.1117	79.8858	79.5067	92.526	86.1945	88.0128	82.5898	83.8842	76.2708	85.5744	88.5274	3.82328	3.87804	108.761	103.019	85.2114	93.4343	48.702	81.393	85.791	112.64	114.242	90.919	124.039	91.113	84.048	120.812	101.647	94.734	78.346	99.472	64.643	108.193	139.572	87.288	104.937	169.26	89.6481	76.3702	105.647	81.0619	96.5023	94.7832	84.3669	105.139	102.313
Cu	22.747	32.849	16.6286	45.0031	41.9694	-	10.887	2.26628	4.77015	41.7629	41.4522	10.7012	23.614	11.325	7.66473	7.67239	27.8718	6.5004	53.7847	3.43712	8.475	66.709	31.172	27.431	17.693	62.954	50.545	21.168	51.013	15.234	65.051	12.073	25.933	96.456	21.938	10.028	20.354	63.892	22.012	28.785	58.094	73.5977	31.5862	63.7747	49.707	80.5126	21.0513	26.9778	31.4976
Ni	45.198	18.465	-	17.1054	19.3159	-	-	-	-	3.49446	4.33088	-	6.92089	-	2.90101	2.99474	-	11.2217	14.3832	8.49219	28.534	43.515	28.76	48.253	381.352	264.028	68.985	102.499	52.318	237.265	70.252	48.037	45.413	60.576	116.987	81.614	-	61.126	137.455	488.773	60.4901	58.7354	21.0928	89.8776	98.2444	83.8786	33.1533	66.7073	18.6536
Co	33.851	29.927	19.4779	25.9203	29.8897	22.263	24.4481	19.2578	18.9917	22.1435	21.1946	10.3812	24.3109	24.8746	1.88087	1.85331	24.5323	28.3795	30.2169	27.5465	10.258	39.935	18.901	23.581	84.992	66.769	42.491	42.197	42.949	132.407	51.29	37.318	40.079	55.971	38.836	27.364	26.744	26.576	42.522	92.163	38.7526	34.9997	22.6775	48.9024	63.1298	54.0428	22.2511	45.5897	23.7304
Cr	30.131	-	3.97031	3.05803	53.4895	4.65994	2.09999	-	-	-	15.9094	-	-	-	0.198782	0.209733	6.50181	-	52.6225	9.56812	-	26.304	28.953	89.579	920.271	634.013	12.189	97.154	16.531	293.471	137.687	9.654	18.352	22.007	685.548	150.275	-	61.261	750.846	1447.02	42.5143	28.6097	5.95037	247.037	313.173	184.851	-	86.9934	8.40069
V	248.937	206.885	173.447	206.242	222.493	182.083	193.128	151.862	152.553	192.855	209.65	109.009	193.78	191.408	0.00793027	0.832681	227.218	233.667	245.809	230.393	77.601	357.627	143.006	207.53	156.789	229.949	325.948	233.59	368.888	105.748	339.721	304.21	422.822	521.686	222.151	189.751	227.395	190.067	234.031	197.828	396.624	358.858	151.657	435.501	359.47	441.682	146.84	307.928	176.376
La	9.791	29.957	34.6067	18.2431	18.4624	21.7467	29.4304	29.564	33.201	18.337	27.1271	35.6567	24.0268	28.706	-	-	30.6022	16.8163	18.8451	19.0291	33.67	-	44.921	22.668	18.245	21.458	20.802	15.12	15.435	-	-	17.033	16.783	10.314	-	23.735	36.891	14.45	12.577	11.407	17.2484	9.42015	31.5658	-	-	-	31.4823	9.2309	33.1088
Ce	50.101	54.295	67.8354	63.5605	35.8466	72.0673	54.9357	72.6787	75.2601	51.9617	63.8621	52.6066	75.8326	60.7531	-	-	63.3401	59.5715	46.962	51.3788	36.593	27.471	90.127	61.729	42.444	37.325	68.202	20.524	-	-	36.411	15.801	12.559	19.076	31.372	72.591	76.725	57.028	13.728	-	22.2153	32.8982	68.3085	35.3526	14.7247	14.8541	77.4346	63.9075	82.2421
Nd	24.104	28.413	29.5763	29.1763	22.8494	25.8363	27.7298	33.5871	31.3747	21.8285	22.5597	27.1898	33.7656	24.2764	-	-	32.3617	26.651	23.4511	24.1357	22.818	18.823	36.196	29.469	17.029	16.893	23.293	14.662	4.132	-	11.588	9.789	14.204	13.222	15.94	34.771	40.662	25.204	11.545	3.396	15.215	19.2129	32.0254	20.9968	11.6353	15.2492	33.6244	30.0352	36.219
Pb	11.749	10.542	14.4952	14.1851	2.40276	10.728	12.2833	15.6604	11.9509	17.3483	13.1925	17.9606	16.8919	13.8513	-	-	1.85943	12.1143	-	9.21318	9.091	16.725	20.408	6.71	1.836	7.247	13.39	6.963	14.184	13.802	15.185	7.156	13.023	13.262	6.65	5.404	9.307	8.811	7.903	6.894	-	-	13.5822	6.37706	-		15.5875	-	22.9423
Th	-	-	3.53571	3.22435	-	7.03736	-	5.41657	3.34932	5.46982	2.59363	12.4469	4.70251				3.08187	-	-	-	13.815	-	12.274	5.369	5.079	5.05	2.124	-	2.309	3.905	-	3.386	-	-	-	4.55	2.57	6.13	3.795	4.316	-	-	-	-	-	2.4172	2.30296	-	-
Sr/Y	40.0357	43.8588	19.1278	30.0807	25.6401	20.7237	20.0895	21.2433	20.9044	20.9848	17.9979	13.5225	22.1103	23.3909	#VALUE!	#VALUE!	14.1207	30.3358	29.4242	30.2299	27.4844	55.8779	21.3618	26.5722	33.159	52.3858	66.4761	73.0272	55.6616	82.6281	33.9668	44.8793	49.6876	49.268	28.3715	33.5671	23.8059	39.6975	24.529	6.7061	57.6337	74.6679	42.5977	29.4788	28.0711	34.8423	56.2354	74.4755	38.8104
Al/Si	0.191024	0.236113	0.178012	0.208504	0.199833	0.178866	0.187863	0.172838	0.176041	0.185123	0.178997	0.157772	0.187324	0.189581	0.187813	0.191545	0.193023	0.215071	0.198406	0.201405	0.135352	0.249306	0.1734	0.18624	0.14311	0.178791	0.237929	0.211737	0.262437	0.125047	0.195818	0.198191	0.275823	0.249768	0.156225	0.169006	0.212135	0.184291	0.145668	0.124749	0.252805	0.28294	0.209767	0.225141	0.175391	0.20462	0.214469	0.204141	0.213935
Sr/Nd	-	-	16.9469	18.4352	21.9746	18.1349	18.2255	15.17	16.3527	22.7715	20.6714	16.2085	14.2925	20.857	-	-	17.0216	21.1641	21.2139	25.0688	22.6712	49.3974	15.1078	17.3893	18.96	40.3972	38.2595	54.0606	176.132	-	45.7648	60.4672	50.3068	54.4884	25.7746	16.7261	16.7587	25.0117	35.9999	24.5377	50.519	45.3904	23.8513	29.0259	39.5802	37.6049	26.3876	25.8762	19.9334
[truncated: 49 more columns]

## Sheet: S4, S5 Mineral data
Supplementary Table 4
Averages of the most primitive population of analyses from each mafic body and calculated parental melt compositons
Mineral	cpx		cpx		cpx		ol		ol		ol		cpx		cpx		cpx		ol		cpx		cpx		cpx		cpx
Mafic Body	Keough		Cargyle Meadows		Green Lake		Hidden Lakes		Onion Valley		Casa Diablo		Casa Diablo		Mount Tom		McMurry Meadows		McMurry Meadows		Mount Alice		Tungsten Hills		Bishop Creek		Pine Creek
Sample(s)	SNB-17-08		SNB-19-14		SNB-19-42		SNB-14-52, Lewis et al. (2021)		from Sisson et al. (1996), only Fo content is given (not full mineral analysis)		SNB-19-07		SNB-19-06		SNB-19-17, SNB-19-18		SNB-19-65, SNB-19-66		SNB-19-66		SNB-19-30		SNB-17-26, SNB-17-27		SNB-18-43		SNB-19-57
Latitude	37.2524		37.5719		37.1712		37.4136				37.5501		37.5495		37.346852, 37.34702		37.0648, 37.0648		37.0648		37.127		37.3552		37.2322		37.3535
Longitude	-118.378		-119.156		-118.525		-118.747				-118.707		-118.707		–118.637194, –118.63694		–118.37233, –118.37233		–118.37233		-118.482		-118.525		-118.552		-118.73
Grain ID	n*=1, spots=3	S.D.	n=2, spots=4	S.D.	n=3, spots=3	S.D.	n=1, spots=3	S.D.			n=2, spots=10	S.D.	n=1, spots=8	S.D.	n=5, spots=9	S.D.	n=4, spots=7	S.D.	n=2, spots=4	S.D.	n=1, spots=1	S.D.	n=5, spots=5	S.D.	n=4, spots=8	S.D.	n=1, spots=2	S.D.
SiO2 wt.%	51.5834	0.13066	50.0241	0.346172	53.0765	2.38624	39.0827	0.0542727	–	–	38.6855	0.153998	49.4927	0.304894	50.83	0.306551	51.4111	0.42593	39.0494	0.229392	52.6204	–	52.3394	0.0629947	51.3886	0.370615	52.0361	0.00242184
TiO2 wt.%	0.545883	0.019947	0.892982	0.0636359	0.632125	0.357939	0.00290002	0.00502298	–	–	0.0059894	0.00843452	0.769138	0.0531819	0.54036	0.0553959	0.437456	0.0866195	0.0219935	0.0136267	0.154307	–	0.138948	0.0596869	0.569207	0.066245	0.354183	0.0700722
Al2O3 wt.%	3.56246	0.0506761	3.59872	0.180697	3.61518	1.73679	0	0	–	–	0	0	4.32009	0.317544	2.71653	0.265975	2.87838	0.273845	0.00927325	0.00747497	1.2208	–	1.56388	0.162	2.8235	0.172193	1.98669	0.147155
FeO wt.%	6.18384	0.158993	8.0737	0.452709	6.02761	0.723515	17.7146	0.0820749	–	–	18.1776	1.18583	7.71324	0.268753	8.98847	0.571651	6.27975	0.283799	18.4513	1.36555	7.98381	–	7.01322	0.299527	9.78196	0.591009	8.82066	0.00155988
MnO wt.%	0.174428	0.0116335	0.227769	0.0341328	0.145568	0.0550961	0.327794	0.0147962	–	–	0.489077	0.0607469	0.161559	0.0157214	0.272238	0.0603801	0.184289	0.031895	0.500237	0.0409879	0.446338	–	0.247107	0.0192666	0.251473	0.0130804	0.402881	0.0700347
MgO wt.%	14.4819	0.243971	14.6407	0.42947	14.2883	1.83159	42.6093	0.0371603	–	–	42.4904	1.12782	14.5368	0.349728	15.0823	0.671472	14.8086	0.476298	42.278	1.15658	13.5156	–	14.2664	0.289373	14.7645	0.507552	14.198	0.224686
CaO wt.%	22.8975	0.257033	21.4389	0.656494	24.2441	2.10677	0.0127175	0.0167299	–	–	0.0287009	0.0719418	22.1712	0.456783	20.449	1.15733	23.3194	0.856619	0.0168535	0.00634879	23.8308	–	23.6863	0.654416	20.3862	0.970435	20.8649	0.179785
Na2O wt.%	0.523707	0.0231055	0.328164	0.020405	0.110416	1.18633	0	0	–	–	0.004725	0.00861495	0.243936	0.024539	0.266412	0.0264857	0.3001	0.0845683	0.00866625	0.0117445	0.279489	–	0.268908	0.0514718	0.227513	0.0290414	0.392892	0.0232723
K2O wt.%	0.0466777	0.0135377	0.0027825	0.00321545	0	0.0247957	0.00197549	0.00252963	–	–	0.0025729	0.00490775	0.00196463	0.00356032	0.00211411	0.00295385	0.0213717	0.0297615	0.00426875	0.00320352	0.018182	–	0.0089742	0.0108974	0.00395937	0.00402975	0.0143595	0.00590788
Cr2O3 wt.%	0.208016	0.065363	0.0095245	0.0110014	0.312811	0.153429	0	0	–	–	0.0112468	0.0128472	0.0787646	0.0152742	0.133863	0.0572262	0.138998	0.02731	0.00911175	0.00649133	0.132317	–	0.028715	0.0188558	0.0643317	0.00891974	0.021416	0.00168857
NiO wt.%	0.014096	0.0184051	0	0	0.011786	0.016649	–	–	–	–	0.0165359	0.0194837	0.00249138	0.00562683	0.00694	0.0137938	0.0145607	0.0216141	0.0453793	0.0105903	0	–	0.0119238	0.0175996	0.0102685	0.00655278	0.0053155	0.00751725
Oxide Total	100.222	0.130103	99.2373	0.162292	99.7162	0.132977	99.752	0.212587	–	–	99.9124	0.145539	99.4918	0.0998463	99.2883	0.196272	99.794	0.348337	100.394	0.201074	100.202	–	99.5739	0.393854	100.271	0.468351	99.0974	0.000334462
Mg# mineral	80.6706	0.664128	76.3843	0.606526	80.8628	0.165593	81.0877	0.0782675	81.7	–	80.6341	1.43022	77.0604	0.662154	74.9507	0.917857	80.7799	0.735442	80.323	1.58821	75.1094	–	78.3885	0.570034	72.9202	0.639928	74.153	0.306708
Mg# parental melt	52.4403	1.10542	48.3759	4.05895	48.4331	7.80326	50.9638	0.127633	51.9736	–	50.9046	2.2771	53.4698	1.5213	43.3152	2.94449	54.7916	2.16292	50.4121	2.58187	40.4537	–	46.8953	0.871082	37.6995	1.21428	36.5927	0.556
APFU**
Si	1.89622	0.00458544	1.86447	0.0142117	1.8646	0.0772604	0.996537	0.000889562	–	–	0.989477	0.00413153	1.83798	0.00972593	1.89662	0.0120677	1.89895	0.011716	0.994452	0.0019822	1.95692	–	1.9466	0.00658614	1.90535	0.00827823	1.95145	0.000559971
Ti	0.0150903	0.0005498	0.0250285	0.00177809	0.0176115	0.00997471	5.56296e-05	9.63609e-05	–	–	0.000115477	0.000162721	0.0214806	0.0015022	0.015163	0.00156263	0.0121547	0.00242079	0.000420309	0.000257194	0.00431544	–	0.00388216	0.00166191	0.0158717	0.00185013	0.00998819	0.00197282
Al	0.154342	0.00225269	0.158083	0.00800011	0.157855	0.0738371	0	0	–	–	0	0	0.18909	0.0140164	0.119459	0.0116666	0.125323	0.0121345	0.000278082	0.00022484	0.0535079	–	0.0685314	0.00687766	0.123392	0.00769477	0.0878101	0.00653335
Cr	0.00604624	0.00190168	0.000281064	0.000324628	0.00916285	0.0044996	0	0	–	–	0.000228319	0.00026115	0.00231225	0.000445938	0.00394886	0.001688	0.00405985	0.000800911	0.000184123	0.000131321	0.00389054	–	0.000842928	0.000552496	0.00188663	0.000267333	0.000634999	5.02784e-05
Fe(III)	0.0543246	0.00424291	0.0863523	0.0254416	0.0764902	0.0441616	–	–	–	–			0.107235	0.00474509	0.072296	0.0148303	0.0699126	0.0100228			0.0402875	–	0.049034	0.0071543	0.0486366	0.0121216	0.0172365	0.00205626
Fe(II)	0.135781	0.00460321	0.16528	0.0263091	0.110266	0.0225545	0.377752	0.00200136	–	–	0.388959	0.027518	0.132314	0.00933145	0.208185	0.0222325	0.12409	0.0105935	0.393125	0.0314285	0.208017	–	0.169075	0.00829757	0.254656	0.0144778	0.259401	0.00219743
Mn	0.00543089	0.000359746	0.00719219	0.00109501	0.00456799	0.0016882	0.00707938	0.000318197	–	–	0.0105895	0.00126469	0.00508196	0.000496023	0.00860451	0.00191311	0.00576554	0.000996915	0.0107897	0.000871859	0.0140594	–	0.00778476	0.000615872	0.00789658	0.000390017	0.0127969	0.00222033
Mg	0.793616	0.0131442	0.813443	0.0223003	0.789156	0.104844	1.61966	0.00135944	–	–	1.61997	0.034294	0.804764	0.0184866	0.838934	0.0369048	0.815411	0.0256704	1.6049	0.033247	0.749309	–	0.79098	0.0153964	0.816074	0.0274107	0.793756	0.0122967
Ca	0.901826	0.0101725	0.856155	0.0277444	0.962358	0.0886366	0.000347443	0.000456697	–	–	0.000792021	0.00198868	0.882174	0.018812	0.817514	0.0465154	0.922828	0.0326597	0.000459523	0.000172379	0.949542	–	0.943882	0.0275144	0.809883	0.0392281	0.838354	0.00750338
Na	0.0373264	0.00165518	0.0237146	0.00147766	0.00793144	0.0841753	0	0	–	–	0.000234574	0.000427312	0.0175642	0.00176761	0.0192738	0.00191917	0.0215051	0.00611661	0.000428513	0.000580076	0.0201526	–	0.0193826	0.00366148	0.0163548	0.00207486	0.0285679	0.00170168
XWo = Ca/Ca+Mg+FeT	47.828	0.482003	44.5671	1.58507	49.6504	1.23922	–	–	–	–	–	–	45.7933	1.03697	42.2112	2.48658	47.7577	1.5955	–	–	48.7656	–	48.3274	1.2515	41.984	2.13656	43.9223	0.500156
XEn = Mg/Ca+Mg+FeT	42.0897	0.715433	42.3365	0.957418	40.7145	1.08052	–	–	–	–	–	–	41.7719	0.854049	43.3091	1.81202	42.1999	1.28762	–	–	38.4822	–	40.5032	0.886625	42.297	1.30509	41.5845	0.542876
XFs = FeT/Ca+Mg+FeT	10.0823	0.264106	13.0964	0.677054	9.63519	0.159402	–	–	–	–	–	–	12.4348	0.442477	14.4797	0.901539	10.0423	0.520967	–	–	12.7522	–	11.1694	0.479147	15.719	0.889456	14.4932	0.0427201
XFo= Mg/Mg+FeT	–	–	–	–	–	–	81.0879	0.0782667	–	–	80.6344	1.43021	–	–	–	–	–	–	80.3233	1.5882	–	–	–	–	–	–	–	–
XFa= FeT/Mg+FeT	–	–	–	–	–	–	18.9121	0.0782667	–	–	19.3656	1.43021	–	–	–	–	–	–	19.6767	1.5882	–	–	–	–	–	–	–	–
*n= number of grains, spots= number of EPMA points
**APFU calculations based on 6 O for clinopyroxene and 4 O for olivine
Supplementary Table 5
All olivine, clinopyroxene, and orthopyroxene analyses (collected via EPMA)
[analyses in bold are the most primitive group without evidence of Tschermak exchange in each mafic body and used to calculate parental melt compositions]
																														Clinopyroxene and Orthopyroxene			Olivine
Mineral	Mafic Body	Sample	Grain ID	SiO2 wt.%	TiO2 wt.%	Al2O3 wt.%	FeO wt.%	MnO wt.%	MgO wt.%	CaO wt.%	Na2O wt.%	K2O wt.%	Cr2O3 wt.%	NiO wt.%	Oxide Total	Mg# mineral		APFU	Si	Ti	Al	Cr	Fe(III)	Fe(II)	Mn	Mg	Ca	Na		XWo = Ca/Ca+Mg+FeT	XEn = Mg/Ca+Mg+FeT	XFs = FeT/Ca+Mg+FeT	XFo=Mg/Mg+FeT	XFa=FeT/Mg+FeT
cpx	Bishop Creek	SNB-17-19	17-19-cpx3b-c	51.5517	0.562854	2.19475	9.54179	0.309449	15.3809	18.9254	0.437614	0.005166	0	0	98.9095	74.1824		units	1.92973	0.0158442	0.0968266	0	0.0437944	0.254908	0.00981133	0.858306	0.759023	0.0317608		39.6143	44.796	15.5896
cpx	Bishop Creek	SNB-17-19	17-19-cpx3a-r	50.9559	0.482794	1.79494	9.1798	0.33671	14.2566	21.2343	0.310483	0	0.001924	0	98.5535	73.4631		units	1.92279	0.0137	0.0798258	5.74008e-05	0.0698528	0.219832	0.0107617	0.801978	0.858487	0.0227155		44.0216	41.1239	14.8545
cpx	Bishop Creek	SNB-17-19	17-19-cpx3a-c	50.9173	0.538099	1.81898	9.69448	0.370832	14.3971	20.7096	0.288806	0.001176	0	0	98.7363	72.5817		units	1.91963	0.0152558	0.0808227	0	0.0705255	0.23513	0.0118417	0.809162	0.836527	0.0211108		42.8693	41.4669	15.6638
cpx	Bishop Creek	SNB-17-19	17-19-cpx1-c	51.1092	0.597044	2.24375	9.77479	0.357105	14.2377	20.8484	0.29157	0.000226	3.9e-05	0	99.4598	72.1942		units	1.91407	0.0168146	0.0990351	1.15478e-06	0.0603579	0.245784	0.0113277	0.794888	0.836546	0.0211714		43.1749	41.0249	15.8002
cpx	Bishop Creek	SNB-17-19	17-19-cpx3b-r	51.0771	0.551766	1.98165	10.0048	0.381608	14.3674	20.4138	0.296621	0.00839	0.026903	0	99.1099	71.9084		units	1.92012	0.0155983	0.0877979	0.00079961	0.0615866	0.252946	0.0121508	0.80517	0.822211	0.0216198		42.3402	41.4627	16.1971
cpx	Bishop Creek	SNB-17-19	17-19-cpx3b-c	51.498	0.538882	1.95717	10.1671	0.381932	14.5667	20.1003	0.296744	0.003159	0.004772	0	99.5147	71.8617		units	1.92757	0.0151682	0.0863383	0.00014122	0.0495845	0.268668	0.0121085	0.812808	0.806081	0.0215352		41.6119	41.9592	16.429
cpx	Bishop Creek	SNB-17-19	17-19-cpx3a-c	50.5291	0.522346	1.82033	10.2462	0.355399	14.6675	20.0586	0.295999	0.002938	0.023785	0.002142	98.5244	71.8445		units	1.9088	0.0148388	0.0810446	0.000710391	0.0926493	0.231046	0.0113716	0.826008	0.811852	0.0216798		41.3882	42.1098	16.502
cpx	Bishop Creek	SNB-17-19	17-19-cpx3b-r	51.2457	0.505313	1.75552	10.1532	0.368137	14.4616	20.2591	0.277451	0	0.02169	0	99.0478	71.7427		units	1.92803	0.0142967	0.0778428	0.000645195	0.0570994	0.26236	0.0117314	0.811112	0.816644	0.020239		41.9391	41.655	16.406
cpx	Bishop Creek	SNB-17-19	17-19-cpx3b-r	51.0812	0.530668	1.84616	10.432	0.372498	14.6546	19.7905	0.305394	0.002008	0	0	99.0151	71.4614		units	1.92146	0.0150112	0.0818458	0	0.0674829	0.260684	0.0118681	0.821773	0.797601	0.022273		40.9542	42.1954	16.8503
cpx	Bishop Creek	SNB-17-19	17-19-cpx3a-c	50.9689	0.479082	1.76432	10.5917	0.402501	14.7859	19.6761	0.294905	0.000169	0.004167	0.001086	98.9689	71.3334		units	1.91782	0.0135561	0.0782413	0.000123966	0.0803941	0.252899	0.0128279	0.829393	0.793229	0.0215145		40.5554	42.4043	17.0403
cpx	Bishop Creek	SNB-17-19	17-19-cpx1-c	51.1217	0.570085	2.2322	10.3648	0.396508	14.2933	20.3252	0.298885	0	0.010855	0.011979	99.6256	71.0827		units	1.91364	0.0160477	0.0984786	0.000321262	0.0635239	0.260943	0.0125716	0.797617	0.815168	0.0216923		42.0786	41.1726	16.7488
cpx	Bishop Creek	SNB-17-19	17-19-cpx3b-c	51.1641	0.529297	1.90946	10.911	0.399242	14.8328	19.1834	0.290393	0.0037	0.019435	0	99.2429	70.7877		units	1.92131	0.0149469	0.0845078	0.00057702	0.0635531	0.279099	0.0126985	0.830352	0.771817	0.0211429		39.6858	42.6955	17.6187
cpx	Bishop Creek	SNB-17-19	17-19-cpx1-c	50.8628	0.623421	2.26117	10.8266	0.36317	14.4647	19.6449	0.292027	0.005565	0	0.016773	99.3611	70.4274		units	1.9097	0.0176022	0.100058	0	0.0666015	0.273348	0.0115494	0.809623	0.790262	0.0212586		40.7386	41.7367	17.5247
cpx	Bishop Creek	SNB-17-19	17-19-cpx2	50.4199	0.720742	2.44105	10.3431	0.338605	13.6673	20.8936	0.387971	0.009058	0.021144	0.013168	99.2557	70.1975		units	1.89718	0.0203942	0.108253	0.000629027	0.0842684	0.241202	0.0107916	0.766653	0.842321	0.0283043		43.5433	39.6317	16.825
cpx	Bishop Creek	SNB-17-19	17-19-cpx1-r	51.0206	0.58848	2.16983	10.6651	0.395366	13.9978	20.1579	0.283102	0	0.01369	0	99.2919	70.0557		units	1.91989	0.0166526	0.0962304	0.000407295	0.0509316	0.284691	0.0126013	0.785233	0.812707	0.0206548		42.0316	40.6107	17.3577
cpx	Bishop Creek	SNB-17-19	17-19-cpx1-r	51.0913	0.609698	2.27954	11.0103	0.400029	14.45	19.5913	0.306712	0.004605	0.014146	0	99.7576	70.0544		units	1.91137	0.0171527	0.100508	0.000418415	0.0642753	0.280197	0.0126758	0.805887	0.785268	0.0222472		40.5692	41.6344	17.7964
cpx	Bishop Creek	SNB-17-19	17-19-cpx2	50.8337	0.589545	2.13827	11.1577	0.42973	13.921	20.0221	0.30836	0	0.01251	0	99.413	68.9825		units	1.91275	0.0166819	0.0948254	0.000372168	0.0684327	0.282672	0.0136958	0.780883	0.807189	0.0224963		41.6253	40.2688	18.1059
cpx	Bishop Creek	SNB-17-19	17-19-cpx1-r	51.0991	0.545919	2.05463	12.2653	0.418973	14.9744	17.8685	0.256386	0.001709	0	0	99.4848	68.5163		units	1.91907	0.0154179	0.0909424	0	0.0587546	0.326466	0.0133275	0.838367	0.718988	0.0186689		37.0121	43.1575	19.8304
cpx	Bishop Creek	SNB-17-19	17-19-cpx2	50.8587	0.545187	2.06937	12.1231	0.369051	14.3708	18.6587	0.274295	0	0.011087	0	99.2803	67.8767		units	1.91714	0.0154545	0.0919352	0.000330428	0.0625995	0.319572	0.0117831	0.807564	0.753578	0.0200472		38.778	41.556	19.666
cpx	Bishop Creek	SNB-17-20	17-20-cpx4	54.8463	0.003153	0.094948	6.17645	0.205689	14.359	25.5861	0.057423	0.002485	0.024921	0.003084	101.36	80.5599		units	2.0081	8.68125e-05	0.00409712	0.000721404	0	0.189118	0.00637873	0.783737	1.00369	0.00407634		50.78	39.6519	9.56811
cpx	Bishop Creek	SNB-17-20	17-20-cpx30	54.0583	0.003454	0.050089	6.28799	0.21564	14.4655	25.4185	0.069355	0.000858	0.031945	0.027629	100.629	80.3948		units	1.99258	9.57406e-05	0.00217596	0.000930961	0.0165022	0.177328	0.00673237	0.79487	1.00383	0.00495653		50.3797	39.8925	9.72783
cpx	Bishop Creek	SNB-17-20	17-20-cpx25	54.578	0.038903	0.241027	6.41995	0.261141	14.2351	25.1243	0.142092	0.000139	0.031429	0.022229	101.094	79.8078		units	2.00431	0.00107436	0.010432	0.000912542	0	0.197167	0.00812284	0.779318	0.988549	0.0101173		50.307	39.6592	10.0338
cpx	Bishop Creek	SNB-17-20	17-20-cpx30	53.8319	0.00525	0.090186	6.48576	0.234199	14.1142	24.9233	0.039382	0.006616	0.015565	0	99.7464	79.5044		units	2.00496	0.000147044	0.00395878	0.000458344	0	0.202015	0.00738818	0.783665	0.994559	0.00284388		50.2242	39.5743	10.2015
cpx	Bishop Creek	SNB-17-20	17-20-cpx-3	54.1891	0.018287	0.2288	6.70974	0.29803	14.0339	25.1359	0.211213	0.003207	0.015384	0.005385	100.849	78.8507		units	1.99573	0.000506469	0.00993119	0.000447955	0.0122342	0.194423	0.00929684	0.770509	0.991841	0.0150819		50.3726	39.1319	10.4955
cpx	Bishop Creek	SNB-17-20	17-20-cpx23	54.7804	0.041079	0.332333	6.72908	0.225096	13.9349	25.0874	0.174918	0.000457	0.028422	0	101.334	78.6841		units	2.00964	0.00113327	0.0143688	0.000824371	0	0.206445	0.00699433	0.762086	0.986068	0.0124415		50.4486	38.9894	10.562
cpx	Bishop Creek	SNB-17-20	17-20-cpx4	54.3517	0.005808	0.190611	6.85761	0.241436	14.0236	25.1238	0.166147	0	0.042877	0	101.004	78.4724		units	2.00006	0.000160723	0.00826674	0.00124747	0.00189692	0.20914	0.0075252	0.769306	0.990542	0.0118541		50.2587	39.0335	10.7077
cpx	Bishop Creek	SNB-17-20	17-20-cpx30	53.8092	0.039874	0.28072	6.97288	0.293339	14.2123	24.9048	0.201762	0.001586	0.019202	0.005315	100.741	78.4165		units	1.98326	0.00110518	0.0121942	0.000559558	0.032933	0.181994	0.00915754	0.780899	0.983478	0.0144182		49.6881	39.4532	10.8587
cpx	Bishop Creek	SNB-17-20	17-20-cpx4	54.701	0.04134	0.247961	6.86072	0.304828	13.9599	25.0466	0.211212	0	0.036055	0	101.41	78.3877		units	2.00546	0.00113975	0.0107141	0.0010451	0	0.210351	0.00946584	0.762973	0.983839	0.0150136		50.2686	38.9836	10.7477
cpx	Bishop Creek	SNB-17-20	17-20-cpx30	53.7803	0.021628	0.375253	7.03103	0.271948	14.1902	24.7266	0.208476	0.005587	0.018677	0.011876	100.642	78.2492		units	1.98424	0.000600079	0.0163174	0.000544821	0.0283649	0.188578	0.00849851	0.780492	0.977448	0.0149133		49.494	39.5209	10.9851
cpx	Bishop Creek	SNB-17-20	17-20-cpx4	54.5801	0.050438	0.303901	7.01973	0.276898	14.1303	24.8668	0.181307	0	0.038912	0	101.448	78.2045		units	1.9998	0.00138973	0.0131232	0.00112723	0	0.215094	0.00859326	0.771812	0.97618	0.0128799		49.7268	39.3162	10.9569
cpx	Bishop Creek	SNB-17-20	17-20-cpx26	54.6302	0.023372	0.24	6.94537	0.296487	13.9794	24.9483	0.216051	0.006269	0.008225	0.005327	101.299	78.203		units	2.00505	0.000645072	0.0103815	0.000238673	0	0.213178	0.00921685	0.76487	0.981049	0.0153743		50.0766	39.042	10.8814
cpx	Bishop Creek	SNB-17-20	17-20-cpx27	54.2495	0.038625	0.311305	6.9257	0.287938	13.8651	24.8343	0.196616	0	0.028124	0.017538	100.755	78.1113		units	2.00253	0.00107219	0.0135433	0.000820797	0	0.213798	0.0090026	0.76298	0.982182	0.0140718		50.1379	38.9482	10.9138
cpx	Bishop Creek	SNB-17-20	17-20-cpx26	54.6689	0.050359	0.293792	7.03332	0.283588	13.9564	24.9834	0.195109	0.004552	0.035134	0	101.505	77.9595		units	2.00336	0.00138777	0.0126886	0.00101794	0	0.215543	0.00880222	0.76243	0.980908	0.0138625		50.0749	38.9217	11.0034
cpx	Bishop Creek	SNB-17-20	17-20-cpx20	54.5387	0.049403	0.325436	7.02213	0.25165	13.9274	24.9306	0.172491	0.006894	0.046544	0.005552	101.277	77.9512		units	2.00344	0.00136473	0.0140894	0.0013518	0	0.215724	0.00782988	0.762698	0.981213	0.0122853		50.0712	38.9204	11.0084
cpx	Bishop Creek	SNB-17-20	17-20-cpx22	54.4965	0.041625	0.34345	6.99984	0.266482	13.8671	24.9111	0.221389	0.002934	0.021494	0	101.172	77.9313		units	2.00316	0.00115059	0.0148787	0.000624654	0	0.215175	0.0082966	0.759876	0.981064	0.0157779		50.1537	38.8462	11.0001
cpx	Bishop Creek	SNB-17-20	17-20-cpx28-c	53.8322	0.035863	0.275725	6.97382	0.297109	13.8038	24.8439	0.180699	0	0.0239	0.021564	100.289	77.9166		units	1.99686	0.0010004	0.0120542	0.000700938	0.00451197	0.211826	0.00933485	0.763333	0.987379	0.012996		50.1959	38.806	10.9981
cpx	Bishop Creek	SNB-17-20	17-20-cpx27	54.2935	0.031691	0.258006	6.96847	0.284031	13.7706	24.6355	0.210612	0.007147	0.040272	0	100.5	77.8883		units	2.00988	0.000882224	0.0112566	0.00117869	0	0.215732	0.00890581	0.759945	0.977104	0.0151165		50.0365	38.9161	11.0474
cpx	Bishop Creek	SNB-17-20	17-20-cpx27	54.0749	0.04652	0.342178	7.07056	0.313747	13.9588	24.5038	0.230756	0.002712	0.029153	0.018566	100.592	77.8716		units	1.9986	0.00129298	0.0149052	0.000851902	0.000985877	0.217559	0.00982192	0.769107	0.970337	0.016536		49.5578	39.2804	11.1617
cpx	Bishop Creek	SNB-17-20	17-20-cpx26	54.531	0.062147	0.344335	7.06048	0.291777	13.9284	24.8399	0.241293	0.000772	0.030508	0	101.331	77.8586		units	2.00105	0.00171496	0.0148919	0.000885122	0	0.216673	0.00906882	0.761943	0.976611	0.0171674		49.9488	38.9695	11.0817
cpx	Bishop Creek	SNB-17-20	17-20-cpx19	54.2874	0.028122	0.333847	6.99116	0.25965	13.7876	24.8949	0.234086	0	0.02192	0	100.839	77.8535		units	2.002	0.000779886	0.01451	0.000639117	0	0.21561	0.00811033	0.757986	0.98363	0.0167373		50.2563	38.7275	11.0161
cpx	Bishop Creek	SNB-17-20	17-20-cpx25	54.3971	0.048415	0.3084	7.0488	0.289078	13.8991	24.8217	0.202904	0	0.04531	0	101.061	77.8508		units	2.00209	0.00134001	0.0133776	0.00131849	0	0.21696	0.00901175	0.76261	0.978809	0.0144792		49.9806	38.9409	11.0785
cpx	Bishop Creek	SNB-17-20	17-20-cpx21	54.554	0.038172	0.33847	7.05537	0.275289	13.9008	24.6076	0.243905	0.00649	0.015776	0	101.036	77.8369		units	2.00772	0.00105644	0.0146809	0.000459039	0	0.217147	0.00858128	0.762652	0.970295	0.0174038		49.7563	39.1085	11.1352
cpx	Bishop Creek	SNB-17-20	17-20-cpx1	54.2165	0.061019	0.341773	7.14098	0.29128	13.975	24.7692	0.207985	0	0.020575	0	101.024	77.7204		units	1.99555	0.00168895	0.014826	0.000598751	0.00494014	0.214869	0.00908087	0.766815	0.976789	0.0148426		49.7496	39.0552	11.1952
cpx	Bishop Creek	SNB-17-20	17-20-cpx29-r	54.5866	0.009378	0.366223	7.08444	0.305303	13.814	24.8291	0.214715	0	0.044728	0	101.254	77.6575		units	2.00583	0.000259143	0.0158602	0.00129946	0	0.217706	0.00950222	0.756724	0.977522	0.0152974		50.0792	38.7676	11.1532
cpx	Bishop Creek	SNB-17-20	17-20-cpx21	54.703	0.018281	0.212338	7.1121	0.320272	13.8189	24.7498	0.180685	0.00952	0.021788	0.00808	101.155	77.5959		units	2.01352	0.000506016	0.00921143	0.000634069	0	0.218926	0.00998501	0.758272	0.976054	0.0128947		49.9707	38.821	11.2083
cpx	Bishop Creek	SNB-17-20	17-20-cpx1	54.1673	0.05453	0.357732	7.16242	0.270355	13.8684	24.5961	0.215086	0.004626	0.030414	0.008406	100.735	77.5354		units	2.00033	0.00151433	0.0155696	0.000888	0	0.221197	0.00845637	0.763481	0.973166	0.0154001		49.706	38.996	11.298
cpx	Bishop Creek	SNB-17-20	17-20-cpx4	54.4218	0.028614	0.345896	7.14477	0.242088	13.8293	24.736	0.173543	0.000491	0.030115	0	100.953	77.5292		units	2.00615	0.000793212	0.0150277	0.000877704	0	0.220259	0.00755873	0.759971	0.976962	0.0124035		49.9165	38.8297	11.2538
cpx	Bishop Creek	SNB-17-20	17-20-cpx26	54.498	0.024928	0.267556	7.1863	0.299751	13.8995	24.7422	0.217492	0.005788	0.02042	0.009018	101.171	77.5165		units	2.00427	0.000689421	0.011597	0.000593755	0	0.221023	0.00933733	0.762051	0.974927	0.0155084		49.7919	38.9199	11.2882
cpx	Bishop Creek	SNB-17-20	17-20-cpx23	54.3368	0.054115	0.385872	7.15417	0.279583	13.8124	24.6983	0.214181	0	0.03717	0.014982	100.988	77.4849		units	2.00228	0.00149958	0.0167583	0.00108293	0	0.220468	0.00872625	0.758766	0.975115	0.0153024		49.8946	38.8245	11.2809
cpx	Bishop Creek	SNB-17-20	17-20-cpx19	54.2817	0.045128	0.400937	7.15397	0.277762	13.7227	24.6493	0.258896	0	0.030773	0	100.821	77.3715		units	2.00303	0.00125228	0.0174367	0.000897798	0	0.220768	0.00868144	0.754884	0.974529	0.0185228		49.9712	38.7084	11.3204
cpx	Bishop Creek	SNB-17-20	17-20-cpx19	54.3582	0.028475	0.303421	7.13185	0.278265	13.6738	24.9167	0.205857	0.004418	0.029345	0.007178	100.938	77.3633		units	2.0051	0.000789869	0.0131908	0.000855815	0	0.220003	0.0086939	0.751912	0.984734	0.0147225		50.3276	38.4286	11.2439
cpx	Bishop Creek	SNB-17-20	17-20-cpx19	54.3609	0.026055	0.293493	7.16123	0.284329	13.6878	24.9142	0.201944	0.002355	0.004115	0	100.936	77.3092		units	2.00502	0.000722676	0.0127581	0.000119999	0	0.22089	0.00888257	0.752619	0.984547	0.0144414		50.2819	38.4371	11.2811
cpx	Bishop Creek	SNB-17-20	17-20-cpx21	54.7232	0.033498	0.271742	7.18408	0.315475	13.7312	24.7652	0.205808	0.003071	0.030352	0	101.264	77.3088		units	2.01243	0.000926378	0.0117777	0.000882493	0	0.220941	0.00982651	0.752773	0.975771	0.0146743		50.0528	38.6139	11.3333
cpx	Bishop Creek	SNB-17-20	17-20-cpx29-r	54.3872	0.050335	0.407119	7.16254	0.269899	13.6303	24.7534	0.205389	0.002699	0.043928	0	100.913	77.232		units	2.00696	0.0013968	0.017706	0.00128162	0	0.221037	0.00843587	0.749819	0.978666	0.0146949		50.2003	38.4617	11.338
cpx	Bishop Creek	SNB-17-20	17-20-cpx28-c	53.5136	0.066068	0.538092	7.32729	0.273677	13.9396	24.0503	0.22847	0.004373	0.023068	0	99.9644	77.2267		units	1.98997	0.00184754	0.0235828	0.000678216	0.0085784	0.219289	0.00861999	0.772754	0.958209	0.0164725		48.9174	39.4498	11.6328
cpx	Bishop Creek	SNB-17-20	17-20-cpx19	54.5514	0.005265	0.223407	7.14757	0.284129	13.5741	25.0159	0.18686	0.000913	0.011858	0	101.001	77.1961		units	2.0121	0.000146037	0.00971173	0.000345805	0	0.220475	0.00887657	0.746385	0.988595	0.0133631		50.5558	38.1694	11.2749
cpx	Bishop Creek	SNB-17-20	17-20-cpx21	54.5286	0.029134	0.307726	7.1977	0.29605	13.6678	24.7441	0.24351	0.004114	0.026294	0	101.045	77.1942		units	2.00911	0.000807235	0.0133628	0.000765969	0	0.221783	0.0092391	0.750734	0.976805	0.0173957		50.11	38.5126	11.3774
cpx	Bishop Creek	SNB-17-20	17-20-cpx31	53.7788	0.023291	0.291595	7.24427	0.282035	13.7516	24.9346	0.151359	0.002668	0.032296	0	100.493	77.1883		units	1.99233	0.000648871	0.0127317	0.000945962	0.0112445	0.213195	0.0088499	0.759472	0.989714	0.0108719		50.147	38.481	11.372
cpx	Bishop Creek	SNB-17-20	17-20-cpx31	53.5749	0.030751	0.312084	7.38458	0.30132	14.012	24.7265	0.19379	0.0063	0.042253	0.017228	100.602	77.1808		units	1.98083	0.000855	0.0135992	0.00123515	0.0356858	0.192647	0.00943626	0.772315	0.979503	0.013892		49.4661	39.0028	11.5311
cpx	Bishop Creek	SNB-17-20	17-20-cpx2	54.2306	0.069573	0.50782	7.32953	0.303273	13.8904	24.4238	0.275582	0.006585	0.029438	0.00299	101.07	77.1592		units	1.99559	0.00192525	0.0220238	0.000856467	0.0017506	0.223808	0.00945249	0.761994	0.962938	0.0196618		49.369	39.0668	11.5642
cpx	Bishop Creek	SNB-17-20	17-20-cpx20	54.4404	0.083914	0.454112	7.34674	0.276542	13.9021	24.5786	0.255117	0.001693	0.027938	0	101.367	77.1326		units	1.99795	0.0023159	0.0196419	0.000810653	0	0.225483	0.00859629	0.760595	0.966449	0.0181531		49.4973	38.9544	11.5483
cpx	Bishop Creek	SNB-17-20	17-20-cpx26	54.4312	0.034787	0.329487	7.36817	0.276039	13.9382	24.5502	0.210275	0.002758	0.035759	0.00205	101.179	77.1269		units	2.0019	0.000962124	0.0142819	0.00103981	0	0.226626	0.00859903	0.764201	0.967401	0.0149944		49.4019	39.0251	11.573
cpx	Bishop Creek	SNB-17-20	17-20-cpx-3	54.1077	0.016017	0.227616	7.32967	0.29089	13.8489	24.9171	0.159058	7.8e-05	0.014153	0	100.911	77.106		units	1.99612	0.000444355	0.00989662	0.000412812	0.00793337	0.218202	0.00908956	0.761643	0.984879	0.0113771		49.9265	38.61	11.4635
cpx	Bishop Creek	SNB-17-20	17-20-cpx20	54.1927	0.051642	0.407379	7.23255	0.245275	13.66	24.6779	0.22807	0	0.038833	0.001254	100.736	77.099		units	2.0026	0.00143508	0.0177422	0.00113456	0	0.223512	0.00767701	0.752508	0.977054	0.0163406		50.0265	38.5294	11.4441
cpx	Bishop Creek	SNB-17-20	17-20-cpx25	54.1935	0.053339	0.410569	7.2776	0.28131	13.7359	24.7523	0.219494	0	0.036067	0.013978	100.974	77.0872		units	1.99804	0.00147885	0.0178402	0.00105134	0	0.224389	0.00878474	0.754962	0.977759	0.0156902		49.9593	38.5753	11.4653
cpx	Bishop Creek	SNB-17-20	17-20-cpx29-r	54.367	0.053757	0.293436	7.25347	0.300471	13.6825	24.8525	0.200563	0	0.021644	0	101.025	77.0771		units	2.00423	0.00149028	0.0127492	0.000630849	0	0.223622	0.00938211	0.751945	0.981614	0.0143354		50.1545	38.4198	11.4257
cpx	Bishop Creek	SNB-17-20	17-20-cpx20	53.5953	0.081096	0.488566	7.22012	0.261459	13.5807	24.4455	0.256733	0.034581	0.029179	0.002227	99.9955	77.0264		units	1.99519	0.00227026	0.0214356	0.00085882	0.0013249	0.223454	0.00824414	0.753677	0.975019	0.0185304		49.912	38.5814	11.5066
cpx	Bishop Creek	SNB-17-20	17-20-cpx27	53.9091	0.049503	0.435962	7.31149	0.27111	13.7502	24.4836	0.269742	0.004864	0.018919	0.010441	100.515	77.0234		units	1.99529	0.00137783	0.0190173	0.000553628	0.00644603	0.219865	0.00849915	0.758685	0.970906	0.0193571		49.6398	38.7895	11.5707
cpx	Bishop Creek	SNB-17-20	17-20-cpx24	53.6545	0.076139	0.85429	7.40034	0.299405	13.8956	23.683	0.201799	0.025502	0.025482	0.010975	100.127	76.9958		units	1.99345	0.00212729	0.0374076	0.000748528	0	0.229936	0.00942201	0.769632	0.942742	0.0145367		48.5372	39.6246	11.8383
cpx	Bishop Creek	SNB-17-20	17-20-cpx26	54.238	0.090798	0.561885	7.4092	0.289304	13.8862	24.4155	0.236762	0.003529	0.024252	0.005448	101.161	76.9626		units	1.995	0.00251151	0.024358	0.00070528	0	0.227911	0.00901319	0.761429	0.962191	0.0168849		49.3044	39.017	11.6786
cpx	Bishop Creek	SNB-17-20	17-20-cpx28-r	53.9683	0.051492	0.445256	7.28603	0.269594	13.6394	24.551	0.225112	0.004826	0.032801	0	100.474	76.9419		units	1.99969	0.00143478	0.0194442	0.00096092	0	0.225773	0.00846098	0.753406	0.974654	0.0161722		49.8842	38.5604	11.5554
cpx	Bishop Creek	SNB-17-20	17-20-cpx26	54.6362	0.026216	0.341449	7.34977	0.298325	13.7172	24.8238	0.253484	0.003584	0.044416	0.006399	101.501	76.8882		units	2.00445	0.000723273	0.0147637	0.00128834	0	0.225499	0.00927023	0.75022	0.975755	0.0180307		50.0009	38.4437	11.5553
cpx	Bishop Creek	SNB-17-20	17-20-cpx23	54.4573	0.04233	0.462629	7.41282	0.296996	13.7992	24.365	0.248111	0	0.045644	0.01068	101.141	76.8423		units	2.00434	0.00117162	0.020068	0.00132824	0	0.228168	0.00925875	0.757142	0.960815	0.0177055		49.3707	38.9051	11.7242
cpx	Bishop Creek	SNB-17-20	17-20-cpx25	54.2035	0.057608	0.578954	7.47764	0.255449	13.9024	24.274	0.26554	0.000798	0.036798	0.021012	101.074	76.82		units	1.99506	0.00159452	0.0251147	0.00107085	0	0.23017	0.00796375	0.762828	0.957253	0.0189498		49.0836	39.1143	11.8021
cpx	Bishop Creek	SNB-17-20	17-20-cpx20	54.5511	0.029833	0.35124	7.32057	0.260255	13.5942	25.034	0.170595	0.004437	0.037929	0.005454	101.36	76.7988		units	2.00596	0.000824965	0.0152222	0.00110272	0	0.225122	0.00810592	0.745211	0.986292	0.0121627		50.4078	38.0866	11.5057
cpx	Bishop Creek	SNB-17-20	17-20-cpx25	54.4549	0.003612	0.254207	7.39993	0.277454	13.7139	24.9128	0.174946	0	0.02705	0.00252	101.221	76.7629		units	2.00428	9.99745e-05	0.0110272	0.000787161	0	0.227774	0.00864963	0.752472	0.982428	0.0124845		50.0556	38.3391	11.6053
cpx	Bishop Creek	SNB-17-20	17-20-cpx28-r	54.6743	0.016225	0.249562	7.31913	0.271228	13.5554	24.8697	0.215665	0.004088	0.02563	0	101.201	76.7513		units	2.01336	0.000449306	0.0108311	0.00074621	0	0.225399	0.00845975	0.744144	0.981217	0.015398		50.2992	38.1464	11.5544
cpx	Bishop Creek	SNB-17-20	17-20-cpx26	54.4048	0.060346	0.427455	7.57348	0.285234	14.011	24.4364	0.237029	0.000445	0.042692	0.005076	101.484	76.7317		units	1.99484	0.00166395	0.0184721	0.00123763	0.00413617	0.228096	0.00885844	0.76586	0.959987	0.0168507		49.027	39.1128	11.8602
cpx	Bishop Creek	SNB-17-20	17-20-cpx1	54.2147	0.019175	0.114206	7.38806	0.255297	13.6574	25.2638	0.092777	0	0.024423	0.01849	101.048	76.7179		units	2.00081	0.000532163	0.00496744	0.000712628	0	0.228021	0.00798031	0.751391	0.998951	0.00663858		50.4938	37.9805	11.5257
cpx	Bishop Creek	SNB-17-20	17-20-cpx4	54.0658	0.089281	0.680953	7.51527	0.284495	13.8902	24.1132	0.291101	0	0.051198	0	100.981	76.7148		units	1.99122	0.00247273	0.0295576	0.00149082	0.00235887	0.229112	0.00887476	0.762631	0.951498	0.0207868		48.9051	39.1977	11.8972
cpx	Bishop Creek	SNB-17-20	17-20-cpx25	54.078	0.03763	0.509929	7.46305	0.295546	13.7469	24.3381	0.2692	0.00594	0.04515	0	100.789	76.654		units	1.99686	0.00104492	0.0221918	0.00131814	0	0.230462	0.00924353	0.756728	0.962879	0.019273		49.3767	38.8052	11.8181
cpx	Bishop Creek	SNB-17-20	17-20-cpx29-c	53.9873	0.067283	0.46701	7.40907	0.292979	13.6143	24.3716	0.222826	0	0.034351	0	100.467	76.6105		units	2.00139	0.00187571	0.0204043	0.00100683	0	0.229699	0.00919947	0.752392	0.968014	0.016016		49.6391	38.5821	11.7788
cpx	Bishop Creek	SNB-17-20	17-20-cpx20	54.3659	0.037965	0.413232	7.33239	0.290852	13.461	24.7162	0.231388	0.010619	0.02281	0.000323	100.883	76.5939		units	2.00844	0.00105472	0.0179921	0.000666243	0	0.226534	0.00910102	0.741339	0.978298	0.0165737		50.2678	38.0922	11.64
cpx	Bishop Creek	SNB-17-20	17-20-cpx30	54.1353	0.017502	0.449092	8.20551	0.233443	15.028	20.843	0.069905	0.01572	0.022199	0.021559	99.0412	76.5512		units	2.03086	0.000493751	0.0198559	0.000658428	0	0.257431	0.00741764	0.840444	0.837757	0.00508457		43.2808	43.4196	13.2996
cpx	Bishop Creek	SNB-17-20	17-20-cpx2	53.1291	0.074169	0.487174	7.49217	0.274632	13.7206	24.5763	0.17449	0.00631	0.038724	0.000694	99.9744	76.5499		units	1.97852	0.00207707	0.021382	0.00114015	0.0288806	0.20445	0.00866253	0.76171	0.980578	0.0125987		49.634	38.5555	11.8105
cpx	Bishop Creek	SNB-17-20	17-20-cpx28-c	53.7084	0.050963	0.452928	7.58727	0.330533	13.801	24.092	0.27275	0.002072	0.03582	0.002457	100.336	76.4281		units	1.99198	0.00142141	0.0197983	0.00105037	0.0119628	0.223371	0.0103835	0.763064	0.957355	0.0196135		48.9507	39.0164	12.0329
cpx	Bishop Creek	SNB-17-20	17-20-cpx28-r	54.1596	0.040345	0.454364	7.63674	0.262347	13.7596	24.0948	0.276137	0	0.032809	0	100.717	76.2566		units	2.00177	0.00112137	0.0197924	0.000958755	0	0.236049	0.00821298	0.758148	0.954156	0.0197884		48.9724	38.9122	12.1153
cpx	Bishop Creek	SNB-17-20	17-20-cpx29-c	54.1951	0.06536	0.391207	7.67952	0.273993	13.8066	24.1227	0.283796	0	0.021164	0.011037	100.85	76.2171		units	2.00066	0.00181446	0.0170206	0.000617713	0	0.237085	0.0085672	0.759815	0.954106	0.0203127		48.9033	38.9448	12.1519
cpx	Bishop Creek	SNB-17-20	17-20-cpx24	53.2973	0.051549	0.958545	7.77342	0.248849	13.9701	22.6774	0.183035	0.045183	0.029773	0	99.2351	76.2102		units	1.99842	0.00145353	0.0423594	0.000882633	0	0.243753	0.00790321	0.780888	0.91103	0.0133065		47.0653	40.342	12.5927
cpx	Bishop Creek	SNB-17-20	17-20-cpx29-c	53.9864	0.091438	0.46512	7.69403	0.279774	13.8259	24.0896	0.213076	0.000787	0.032045	0	100.678	76.2082		units	1.99701	0.00254357	0.0202776	0.0009372	0	0.238016	0.00876576	0.762428	0.954738	0.0152819		48.8311	38.9952	12.1736
cpx	Bishop Creek	SNB-17-20	17-20-cpx4	53.6451	0.026832	0.154685	7.51897	0.254858	13.5112	25.2371	0.118978	0.004494	0.027323	0.021828	100.521	76.2081		units	1.99081	0.000748816	0.00676558	0.000801687	0.0178674	0.215487	0.00801097	0.74749	1.00345	0.0085608		50.5697	37.6702	11.76
cpx	Bishop Creek	SNB-17-20	17-20-cpx-3	54.184	0.03356	0.422255	7.72745	0.260454	13.4397	24.9123	0.19041	0.002097	0.036306	0.012015	101.221	75.6109		units	1.9973	0.000930282	0.0183444	0.0010581	0	0.238212	0.00813184	0.738533	0.983883	0.0136084		50.182	37.6682	12.1498
cpx	Bishop Creek	SNB-17-20	17-20-cpx30	53.6407	0.011656	0.122273	8.01945	0.230209	13.3597	25.1881	0.071875	0.007664	0.023115	0	100.675	74.808		units	1.99119	0.000325379	0.00534941	0.000678405	0.0161049	0.23285	0.00723815	0.739305	1.00178	0.00517302		50.3397	37.1502	12.51
cpx	Bishop Creek	SNB-17-20	17-20-cpx2	52.9547	0.034417	0.7506	8.30424	0.251374	13.4248	23.7464	0.240395	0.019433	0.021771	0.009992	99.7581	74.2378		units	1.98033	0.00096789	0.0330824	0.000643704	0.021118	0.238592	0.00796229	0.748423	0.951455	0.0174303		48.5538	38.1929	13.2533
cpx	Bishop Creek	SNB-17-20	17-20-cpx25	54.3119	0.017757	0.11751	8.63693	0.272415	12.9264	24.7654	0.06789	0.003978	0.000264	0	101.12	72.7357		units	2.01428	0.000495241	0.00513637	7.74115e-06	0	0.267881	0.00855742	0.71468	0.984076	0.00488179		50.0385	36.3402	13.6213
cpx	Bishop Creek	SNB-17-21	17-21-cpx14	50.3368	0.392031	2.16453	9.51663	0.333733	14.0482	21.5985	0.364041	0.00176	0.020526	0.018889	98.7957	72.4618		units	1.8954	0.0111008	0.0960579	0.000611075	0.116915	0.182763	0.0106439	0.788579	0.871357	0.0265774		44.4658	40.2415	15.2927
cpx	Bishop Creek	SNB-17-21	17-21-cpx1	51.619	0.409369	2.07309	9.76131	0.364712	14.0754	21.4146	0.336121	0.000497	0.013918	0.029932	100.098	71.9913		units	1.92192	0.011462	0.0909704	0.000409712	0.0661161	0.237825	0.0115017	0.78126	0.854269	0.0242643		44.0465	40.2821	15.6714
cpx	Bishop Creek	SNB-17-21	17-21-cpx9	52.4093	0.358516	1.59197	10.0761	0.371927	14.2075	21.7282	0.273927	0.000227	0.006938	0	101.025	71.5376		units	1.93583	0.00995836	0.0693026	0.000202613	0.0585401	0.252707	0.011636	0.782323	0.859885	0.0196173		44.0187	40.0482	15.9332
cpx	Bishop Creek	SNB-17-21	17-21-cpx14	50.09	0.426162	2.15216	10.0837	0.364519	14.1801	21.1297	0.350988	0.00281	0.005481	0	98.7856	71.4829		units	1.8875	0.0120762	0.0955796	0.000163294	0.130758	0.187009	0.0116343	0.796569	0.853073	0.0256433		43.3602	40.4882	16.1515
cpx	Bishop Creek	SNB-17-21	17-21-cpx1	51.8364	0.352506	1.87198	10.1023	0.366557	14.1982	21.3441	0.288979	0.005614	0.001981	0.01296	100.382	71.4712		units	1.92587	0.00984873	0.081969	5.81906e-05	0.067344	0.246541	0.0115351	0.786386	0.849628	0.0208164		43.5729	40.3296	16.0975
cpx	Bishop Creek	SNB-17-21	17-21-cpx1	51.4031	0.398226	2.12509	10.0506	0.373034	14.0947	21.0827	0.387744	0.007975	0.003264	0	99.9265	71.4266		units	1.91654	0.0111655	0.0933819	9.62177e-05	0.0791339	0.234251	0.0117805	0.78342	0.842198	0.0280299		43.4346	40.4032	16.1622
cpx	Bishop Creek	SNB-17-21	17-21-cpx8	52.0848	0.371876	1.73348	9.80163	0.344292	13.5234	22.3427	0.291178	0.007806	0.004071	0	100.505	71.093		units	1.93692	0.0103996	0.0759758	0.000119695	0.0502679	0.254559	0.0108446	0.749712	0.89021	0.0209945		45.7751	38.5506	15.6744
cpx	Bishop Creek	SNB-17-21	17-21-cpx1	51.2372	0.411537	2.0491	10.4887	0.370193	14.2795	20.5748	0.309861	0.001941	0.011279	0.003016	99.737	70.8178		units	1.91562	0.0115706	0.0902908	0.000333404	0.0774462	0.250501	0.011723	0.795877	0.824172	0.0224615		42.3087	40.8562	16.8351
cpx	Bishop Creek	SNB-17-21	17-21-cpx1	52.141	0.313709	1.78413	10.5962	0.423636	14.2517	20.7915	0.27864	0.007938	0	0.002724	100.591	70.5662		units	1.93541	0.00875671	0.0780503	0	0.0536755	0.275251	0.013319	0.788618	0.826869	0.0200532		42.5254	40.5582	16.9165
cpx	Bishop Creek	SNB-17-21	17-21-cpx9	52.2996	0.336789	1.63524	10.9187	0.388047	14.5689	20.5551	0.290174	4e-06	0	0	100.993	70.4005		units	1.93265	0.00935907	0.0712181	0	0.0655563	0.271871	0.0121457	0.802583	0.813828	0.0207902		41.6528	41.0772	17.27
cpx	Bishop Creek	SNB-17-21	17-21-cpx11	51.3029	0.472733	2.13421	10.2593	0.365377	13.3145	22.0858	0.311145	0.005564	0.001288	0.002229	100.255	69.8191		units	1.91466	0.0132674	0.0938735	3.80051e-05	0.0727417	0.24746	0.0115499	0.740769	0.883123	0.0225144		45.426	38.1036	16.4705
cpx	Bishop Creek	SNB-17-21	17-21-cpx8	51.695	0.431678	1.96434	10.6018	0.351214	13.6278	21.5096	0.305059	0.001071	0.00526	0	100.493	69.6168		units	1.92433	0.012084	0.0861796	0.000154808	0.062849	0.267191	0.0110736	0.756249	0.857868	0.0220172		44.1254	38.8986	16.976
cpx	Bishop Creek	SNB-17-21	17-21-cpx11	51.9097	0.246408	1.69203	10.7245	0.344809	13.7101	21.582	0.31012	0.007158	0.008995	0.01072	100.547	69.5005		units	1.93116	0.00689359	0.0741878	0.000264574	0.0718047	0.261856	0.0108651	0.760358	0.860239	0.022369		44.0187	38.9078	17.0735
cpx	Bishop Creek	SNB-17-21	17-21-cpx21	54.0841	0.301524	1.27262	11.3853	0.383309	14.1923	17.8611	0.193405	0.007399	0	0.003685	99.6848	68.9634		units	2.03466	0.00853029	0.0564257	0	0	0.358196	0.0122139	0.795945	0.719926	0.014107		38.4152	42.4715	19.1133
cpx	Bishop Creek	SNB-17-21	17-21-cpx17	52.4602	0.465822	1.69434	10.9068	0.355784	13.0136	22.1455	0.295154	0.000322	0.004296	0	101.342	68.0188		units	1.94418	0.0129822	0.0740052	0.000125877	0.0327571	0.305277	0.0111681	0.718973	0.879325	0.0212081		45.4119	37.1307	17.4575
cpx	Bishop Creek	SNB-17-21	17-21-cpx12	52.6777	0.230223	0.99559	10.8824	0.391659	12.8947	22.2649	0.269071	0.002	0.01588	0.034713	100.659	67.8677		units	1.96799	0.00646794	0.0438362	0.000469054	0.0262666	0.313733	0.0123934	0.718153	0.8912	0.0194899		45.7177	36.8406	17.4417
cpx	Bishop Creek	SNB-17-21	17-21-cpx8	52.039	0.379781	1.64524	12.3243	0.386012	14.3504	19.4789	0.232332	0.002929	0.004899	0	100.844	67.4858		units	1.93427	0.0106156	0.072073	0.00014397	0.0547484	0.328346	0.0121528	0.795174	0.775729	0.0167434		39.6996	40.6947	19.6057
cpx	Bishop Creek	SNB-17-21	17-21-cpx7	52.8657	0.076685	0.588843	11.2331	0.380697	13.019	22.4248	0.195301	0.006145	0.00316	0.003248	100.797	67.3833		units	1.97353	0.00215278	0.0259075	9.32679e-05	0.0367701	0.313922	0.0120375	0.724528	0.896923	0.0141358		45.4796	36.7381	17.7823
cpx	Bishop Creek	SNB-17-21	17-21-cpx10	51.1077	0.535907	2.37272	11.2767	0.394878	13.0332	21.5342	0.303388	0.008539	0.020137	0	100.587	67.322		units	1.9074	0.0150406	0.104366	0.00059419	0.0721124	0.279849	0.0124826	0.725126	0.861076	0.0219533		44.4274	37.4131	18.1595
cpx	Bishop Creek	SNB-17-21	17-21-cpx21	52.2617	0.461789	1.60253	11.3411	0.380364	12.7531	22.171	0.311809	0.000747	0	0	101.284	66.7161		units	1.94146	0.0129006	0.0701626	0	0.0435741	0.308762	0.0119682	0.70627	0.882444	0.0224585		45.4622	36.386	18.1518
cpx	Bishop Creek	SNB-17-21	17-21-cpx13	51.9108	0.111312	0.567928	11.5234	0.386692	12.8375	22.1425	0.255925	0.058869	0	0	99.7949	66.5082		units	1.95916	0.00315918	0.0252616	0	0.0688347	0.294869	0.0123613	0.722274	0.895356	0.0187271		45.1895	36.4539	18.3565
cpx	Bishop Creek	SNB-17-21	17-21-cpx13	51.9339	0.147478	0.818117	11.4725	0.379043	12.7337	22.0773	0.2439	0.004628	0.006849	0	99.8174	66.4258		units	1.95904	0.0041835	0.0363717	0.000204265	0.0548183	0.307097	0.0121106	0.716068	0.89227	0.0178382		45.2871	36.344	18.369
cpx	Bishop Creek	SNB-17-21	17-21-cpx25	50.8106	0.438278	2.24651	11.3629	0.349862	12.549	21.911	0.33462	0.008273	0.346846	0	100.358	66.314		units	1.90492	0.0123565	0.0992631	0.010281	0.08022	0.276041	0.0111098	0.70136	0.880123	0.0243233		45.42	36.1947	18.3853
cpx	Bishop Creek	SNB-17-21	17-21-cpx15	50.6763	0.339385	1.77531	13.0787	0.46177	14.3117	17.9055	0.252	0.002621	0.002276	0.000939	98.8065	66.1083		units	1.92388	0.00968919	0.0794334	6.83159e-05	0.0719026	0.343333	0.0148486	0.80998	0.728313	0.018549		37.2819	41.4624	21.2557
cpx	Bishop Creek	SNB-17-21	17-21-cpx11	51.2233	0.480543	2.24727	12.5158	0.390149	13.5898	20.0726	0.29444	0.005856	0	0	100.82	65.934		units	1.90835	0.0134631	0.0986735	0	0.0789677	0.310979	0.0123114	0.754766	0.80122	0.0212684		41.1741	38.7868	20.0391
cpx	Bishop Creek	SNB-17-21	17-21-cpx-5	51.8772	0.49797	1.7285	11.6921	0.383007	12.6748	21.5805	0.283234	0.007118	0.111151	0	100.836	65.8974		units	1.93852	0.0139932	0.0761236	0.00328384	0.0360874	0.329291	0.0121223	0.70606	0.863999	0.0205204		44.641	36.4806	18.8783
cpx	Bishop Creek	SNB-17-21	17-21-cpx2	51.5727	0.535943	1.71656	11.7461	0.356499	12.5522	21.3779	0.300181	0.004267	0.007687	0	100.17	65.5749		units	1.94012	0.0151617	0.0761066	0.000228634	0.0350007	0.334538	0.0113593	0.703945	0.861648	0.0218947		44.5266	36.3771	19.0963
cpx	Bishop Creek	SNB-17-21	17-21-cpx1a (incl)	51.5617	0.471819	1.81482	11.966	0.370205	12.7674	21.3834	0.309615	0.00713	0.006649	0.009773	100.668	65.5397		units	1.92889	0.0132732	0.0800145	0.000196658	0.0579209	0.316437	0.0117303	0.712016	0.857065	0.0224569		44.1004	36.6369	19.2626
cpx	Bishop Creek	SNB-17-21	17-21-cpx-4	51.0641	0.659891	2.12989	11.4945	0.3621	12.2503	22.1566	0.358743	0.013629	0.034627	0.009704	100.534	65.5142		units	1.91405	0.0186008	0.0940919	0.00102619	0.0656492	0.294666	0.0114961	0.684534	0.889813	0.0260716		45.9932	35.3826	18.6242
cpx	Bishop Creek	SNB-17-21	17-21-cpx24-r	51.6314	0.493574	1.7882	11.8338	0.39658	12.5981	21.7914	0.297782	0.007397	0.007238	0	100.845	65.4893		units	1.92917	0.0138685	0.0787461	0.000213821	0.0565319	0.313243	0.0125509	0.701734	0.872367	0.0215726		44.8777	36.0997	19.0226
cpx	Bishop Creek	SNB-17-21	17-21-cpx22	51.2902	0.616958	1.96864	11.7246	0.361528	12.47	21.8866	0.349164	0.010614	0.001315	0	100.68	65.4678		units	1.91913	0.0173598	0.0868141	3.89019e-05	0.0655044	0.301375	0.0114577	0.695576	0.877416	0.0253306		45.2306	35.8568	18.9126
cpx	Bishop Creek	SNB-17-21	17-21-cpx22	51.3451	0.60137	2.02364	11.7581	0.375434	12.4595	22.1746	0.333294	0	0.015987	0.00083	101.088	65.3841		units	1.91363	0.0168548	0.0888894	0.000471089	0.0737449	0.292739	0.0118517	0.692259	0.885471	0.0240843		45.5439	35.6061	18.85
cpx	Bishop Creek	SNB-17-21	17-21-cpx24-r	51.4765	0.560554	1.90194	11.8878	0.375451	12.578	21.7031	0.319336	0.00737	0	0	100.81	65.3501		units	1.92396	0.0157552	0.0837797	0	0.0599402	0.311633	0.0118857	0.700819	0.869091	0.0231409		44.7643	36.0971	19.1386
cpx	Bishop Creek	SNB-17-21	17-21-cpx20	51.2351	0.511445	2.27386	11.6493	0.347709	12.2761	21.6736	0.364648	0.011486	0.25432	0	100.598	65.2589		units	1.91952	0.0144094	0.100402	0.00753322	0.0506961	0.314293	0.0110338	0.685636	0.869989	0.0264878		45.2974	35.6988	19.0038
cpx	Bishop Creek	SNB-17-21	17-21-cpx6-r	52.167	0.161555	0.875396	12.1542	0.379413	12.7442	21.7467	0.262585	0.009355	0.005061	0	100.505	65.1453		units	1.95717	0.00455799	0.0387072	0.000150122	0.0567941	0.324547	0.0120567	0.712776	0.874144	0.0191007		44.412	36.2135	19.3745
cpx	Bishop Creek	SNB-17-21	17-21-cpx27	50.4319	0.323343	1.68043	12.0845	0.380774	12.6435	20.8533	0.319313	0.093711	0.050077	0.00467	98.8655	65.0956		units	1.92243	0.00926891	0.0754952	0.00150924	0.083206	0.302034	0.0122941	0.718487	0.85168	0.0235998		43.5551	36.7436	19.7012
cpx	Bishop Creek	SNB-17-21	17-21-cpx6-r	52.3167	0.148854	0.841501	12.2279	0.393841	12.718	21.8007	0.261545	0.001668	0	0	100.711	64.9612		units	1.95935	0.0041923	0.0371434	0	0.0547683	0.328214	0.0124933	0.710069	0.874781	0.0189917		44.454	36.0838	19.4621
cpx	Bishop Creek	SNB-17-21	17-21-cpx23	51.8781	0.564396	1.95963	12.6946	0.373401	13.0828	19.648	0.269417	0.015216	0.00922	0	100.495	64.7519		units	1.94612	0.0159217	0.0866395	0.000273459	0.00860367	0.389651	0.0118644	0.731634	0.789699	0.0195955		41.139	38.1141	20.7469
cpx	Bishop Creek	SNB-17-21	17-21-cpx13-r	50.9676	0.371146	1.30535	12.7556	0.418371	12.8935	21.0253	0.265291	0.002943	0.00809	0	100.013	64.3086		units	1.92194	0.0105247	0.0580132	0.000241195	0.0962204	0.306034	0.0133626	0.724809	0.849462	0.0193961		42.9775	36.6709	20.3516
cpx	Bishop Creek	SNB-17-21	17-21-cpx6-r	52.3543	0.1234	0.741297	12.8813	0.427981	12.7372	21.4671	0.228548	0.003063	0.002399	0.012351	100.979	63.8019		units	1.9592	0.00347266	0.0326945	7.09794e-05	0.0584691	0.34466	0.0135655	0.710573	0.860711	0.0165825		43.5933	35.9891	20.4177
cpx	Bishop Creek	SNB-17-21	17-21-cpx-3	52.3875	0.194145	0.899052	12.5833	0.476555	12.4109	21.7468	0.253114	0	0.011753	0	100.963	63.7432		units	1.96168	0.00546699	0.0396772	0.000347957	0.0440504	0.349999	0.0151147	0.692808	0.872475	0.0183766		44.5292	35.3594	20.1114
cpx	Bishop Creek	SNB-17-21	17-21-cpx-5	51.8824	0.435636	1.63067	14.2332	0.372837	13.9135	18.5678	0.252234	0.002543	0.007468	0	101.298	63.5367		units	1.93085	0.0121919	0.0715236	0.000219739	0.0603799	0.382602	0.0117526	0.77192	0.740363	0.0182003		37.8651	39.479	22.6559
cpx	Bishop Creek	SNB-17-21	17-21-cpx-5	51.735	0.552375	1.72477	13.1067	0.42684	12.6235	19.305	0.285176	0.005986	0.051826	0	99.8173	63.192		units	1.95962	0.0157341	0.076997	0.00155207	0	0.415182	0.0136943	0.712815	0.783458	0.0209434		40.9875	37.2917	21.7207
cpx	Bishop Creek	SNB-17-21	17-21-cpx21	51.4803	0.593489	1.8556	13.8613	0.407192	13.1138	19.1671	0.288433	0.003428	0.016642	0.012891	100.8	62.7755		units	1.92976	0.01673	0.081979	0.000493222	0.0455181	0.389014	0.0129285	0.732824	0.769795	0.020963		39.7385	37.83	22.4315
cpx	Bishop Creek	SNB-17-21	17-21-cpx26	51.9778	0.435383	1.60199	15.2823	0.554074	14.4366	14.7034	0.196205	0.009457	0.017133	0	99.2143	62.7406		units	1.978	0.0124595	0.0718495	0.000515486	0	0.486354	0.0178592	0.818997	0.59949	0.0144765		31.4719	42.9955	25.5325
cpx	Bishop Creek	SNB-17-21	17-21-cpx-3	52.3135	0.149613	0.66119	13.8272	0.439791	12.7525	20.6248	0.234969	0	0.053038	0.003617	101.06	62.1782		units	1.96027	0.00421592	0.0292001	0.00157132	0.0573267	0.375977	0.0139584	0.712371	0.828038	0.017071		41.9533	36.093	21.9537
cpx	Bishop Creek	SNB-17-21	17-21-cpx22	51.4793	0.616782	2.05707	14.3799	0.425951	12.9982	18.699	0.290735	0	0.022716	0	100.97	61.7041		units	1.92901	0.0173802	0.0908463	0.000672993	0.0368131	0.413812	0.0135191	0.726097	0.750721	0.0211226		38.9491	37.6715	23.3794
cpx	Bishop Creek	SNB-17-21	17-21-cpx24-c	51.8375	0.450146	1.56896	15.6011	0.442961	13.6952	16.8487	0.248018	0	0	0	100.693	61.0101		units	1.94884	0.0127264	0.0695186	0	0.0254221	0.465083	0.0141054	0.767555	0.678669	0.0180785		35.042	39.6315	25.3265
cpx	Bishop Creek	SNB-17-21	17-21-cpx25	50.6152	0.594549	2.4292	15.4791	0.470623	12.6998	17.6842	0.270689	0.00695	0.142422	0	100.393	59.3905		units	1.91387	0.016906	0.108256	0.0042578	0.0457727	0.443706	0.0150727	0.715879	0.716432	0.0198449		37.2794	37.2507	25.4699
cpx	Bishop Creek	SNB-17-21	17-21-cpx18	50.6626	0.473889	2.33768	15.7468	0.452723	12.1817	18.1754	0.279342	0.130487	0.041085	0	100.482	57.9648		units	1.92024	0.0135072	0.104426	0.00123119	0.0473777	0.451755	0.014534	0.688311	0.73809	0.0205282		38.3317	35.7465	25.9218
cpx	Bishop Creek	SNB-18-27B	18-27B-cpx8-c	53.2295	0.08079	0.806346	8.11999	0.235843	13.2118	24.5988	0.270338	0	0.005541	0	100.559	74.3608		units	1.97493	0.00225412	0.0352594	0.000162541	0.0296632	0.222284	0.00741152	0.730747	0.977844	0.019447		49.8763	37.2728	12.8509
cpx	Bishop Creek	SNB-18-27B	18-27B-cpx8-c	53.3616	0.144916	1.05602	8.36712	0.21419	12.9645	24.531	0.200254	0.000257	0.006092	0	100.846	73.418		units	1.97825	0.00404007	0.0461403	0.000178561	0.0035043	0.255904	0.00672568	0.716498	0.97437	0.0143939		49.9606	36.7383	13.3011
cpx	Bishop Creek	SNB-18-27B	18-27B-cpx1-c	52.0715	0.636629	2.54283	8.36084	0.230802	12.8696	23.599	0.46148	0.000412	0.023394	0	100.796	73.289		units	1.92647	0.0177121	0.110876	0.000684295	0.0331712	0.225513	0.0072325	0.709799	0.935437	0.0331027		49.1322	37.2809	13.5869
cpx	Bishop Creek	SNB-18-27B	18-27B-cpx1-c	51.9199	0.610719	2.61139	8.37969	0.206023	12.8232	23.6665	0.489817	0	0.023531	0.02212	100.753	73.1741		units	1.92153	0.0169971	0.113904	0.000688539	0.0435056	0.21585	0.00645824	0.707484	0.938437	0.0351474		49.2546	37.1329	13.6125
cpx	Bishop Creek	SNB-18-27B	18-27B-cpx5-i	51.0873	0.682096	2.8844	8.23959	0.180378	12.5992	23.7297	0.474792	0.001436	0.018535	0.005885	99.9033	73.1591		units	1.90651	0.0191422	0.126863	0.000546882	0.0556465	0.201504	0.00570157	0.700933	0.948803	0.0343539		49.7567	36.758	13.4854
cpx	Bishop Creek	SNB-18-27B	18-27B-cpx5-c	51.2701	0.606099	2.61506	8.43637	0.224095	12.882	23.4661	0.430689	0	0.029747	0	99.9603	73.1317		units	1.91204	0.0169979	0.11494	0.000877103	0.0572535	0.20586	0.00707864	0.716186	0.937628	0.0311417		48.9131	37.3611	13.7258
cpx	Bishop Creek	SNB-18-27B	18-27B-cpx7-c	51.9891	0.584656	2.70986	8.40788	0.196114	12.6832	23.9579	0.425928	0.001938	0.003411	0	100.96	72.8918		units	1.92152	0.01625	0.118041	9.96757e-05	0.0368468	0.223034	0.00613941	0.698828	0.948722	0.0305221		49.7382	36.6371	13.6247
cpx	Bishop Creek	SNB-18-27B	18-27B-cpx1-c	51.5392	0.618899	2.5739	8.4508	0.20795	12.6342	23.7555	0.472195	0.004698	0.00332	0	100.261	72.7143		units	1.91798	0.01732	0.11289	9.76833e-05	0.0504802	0.212523	0.00655468	0.700912	0.947172	0.0340702		49.562	36.6761	13.762
cpx	Bishop Creek	SNB-18-27B	18-27B-cpx5-c	50.6948	0.652608	2.85522	8.55791	0.204007	12.5948	23.4875	0.44398	0.007153	0.030225	0.003303	99.5316	72.4014		units	1.90036	0.0183969	0.126144	0.000895805	0.0677185	0.200566	0.00647743	0.703838	0.943337	0.0322688		49.2486	36.7451	14.0063
cpx	Bishop Creek	SNB-18-27B	18-27B-cpx8-c	52.9463	0.103713	0.924942	8.76634	0.220325	12.6822	24.3432	0.225916	0.006736	0.010307	0	100.23	72.0575		units	1.97807	0.00291381	0.0407266	0.000304449	0.0133567	0.260537	0.00697199	0.706337	0.974413	0.0163644		49.8512	36.1364	14.0125
cpx	Bishop Creek	SNB-18-27B	18-27B-cpx7-c	51.9641	0.636313	2.93701	8.6679	0.181435	12.4309	23.9064	0.489593	0	0.029472	0	101.243	71.8814		units	1.91706	0.0176533	0.127701	0.000859644	0.0370237	0.230402	0.00566944	0.683666	0.944941	0.03502		49.8378	36.0577	14.1045
cpx	Bishop Creek	SNB-18-27B	18-27B-cpx8-r	52.4605	0.09737	0.975503	9.11168	0.210194	12.4281	24.2781	0.264286	0	0.015093	0.01799	99.8588	70.8566		units	1.96951	0.00274899	0.0431629	0.000447999	0.0310986	0.254977	0.00668394	0.695567	0.976561	0.0192375		49.8702	35.5207	14.6091
cpx	Bishop Creek	SNB-18-27B	18-27B-cpx6-c	50.9622	0.686358	2.73015	9.03633	0.179123	12.0677	24.0251	0.419424	0	0.012846	0.029723	100.149	70.4186		units	1.90586	0.0193025	0.120333	0.000379827	0.0593777	0.223234	0.00567387	0.672786	0.962643	0.0304118		50.1889	35.0767	14.7344
cpx	Bishop Creek	SNB-18-27B	18-27B-cpx6-c	50.7951	0.705878	2.80017	9.02586	0.164646	12.0166	23.9875	0.404602	0.002667	0.017667	0	99.9208	70.3543		units	1.90374	0.0198947	0.123688	0.00052351	0.0579136	0.224985	0.00522665	0.671395	0.963229	0.0294009		50.233	35.0137	14.7533
cpx	Bishop Creek	SNB-18-27B	18-27B-cpx3-c	51.4309	0.648237	2.51291	9.3548	0.195846	12.2764	23.6541	0.433311	0	0.020227	0.00628	100.533	70.053		units	1.91603	0.0181607	0.110334	0.000595778	0.0519952	0.239457	0.00617985	0.681801	0.944151	0.0312985		49.2411	35.5585	15.2004
cpx	Bishop Creek	SNB-18-27B	18-27B-cpx6-c	50.8453	0.650706	3.03643	9.24153	0.188763	11.7295	23.935	0.437325	0	0.008077	0	100.073	69.3477		units	1.90457	0.0183295	0.134049	0.000239205	0.0516821	0.237815	0.00598891	0.654985	0.960584	0.0317611		50.4226	34.3812	15.1962
cpx	Bishop Creek	SNB-18-27B	18-27B-cpx2	51.6012	0.682588	2.87223	9.63199	0.202339	12.0932	23.4237	0.404587	0.029373	0.018219	0.02024	100.98	69.1167		units	1.91738	0.0190734	0.125783	0.000535239	0.0299258	0.269383	0.00636815	0.669879	0.932525	0.0291479		49.036	35.225	15.7389
cpx	Bishop Creek	SNB-18-27B	18-27B-cpx19-r	51.4938	0.048591	0.677874	9.70752	0.232275	12.0711	24.2838	0.246888	0	0	0	98.7619	68.9107		units	1.95913	0.00139022	0.0303957	0	0.0667832	0.242084	0.00748507	0.684644	0.989879	0.0182119		49.9084	34.5189	15.5727
cpx	Bishop Creek	SNB-18-27B	18-27B-cpx15-r	51.827	0.521796	1.64993	9.86741	0.227505	12.1172	23.8227	0.491508	0.001263	0.011734	0.006383	100.544	68.6417		units	1.93459	0.0146472	0.0725859	0.000346301	0.0641722	0.243857	0.00719298	0.674285	0.952755	0.0355721		49.2362	34.8455	15.9182
cpx	Bishop Creek	SNB-18-27B	18-27B-cpx22-c	51.1637	0.146483	0.801517	9.93027	0.201309	12.1329	23.9917	0.284327	0.008938	0.026275	0	98.6874	68.5327		units	1.94802	0.0041941	0.0359666	0.00079095	0.0798109	0.236379	0.00649202	0.688659	0.978702	0.0209892		49.3409	34.7185	15.9406
cpx	Bishop Creek	SNB-18-27B	18-27B-cpx15-c	51.7095	0.615843	2.58425	9.82709	0.219186	11.9799	23.5702	0.437635	0.00061	0.02949	0	100.974	68.4843		units	1.92216	0.0172151	0.113216	0.000866703	0.0386978	0.266795	0.0069011	0.663871	0.938731	0.0315413		49.1973	34.7923	16.0104
cpx	Bishop Creek	SNB-18-27B	18-27B-cpx3-r	51.0023	0.689447	2.80223	9.70287	0.21467	11.8142	23.8193	0.430396	0.003446	0.020958	0	100.5	68.4583		units	1.90479	0.0193633	0.123344	0.000618847	0.0588949	0.244155	0.0067907	0.657766	0.953111	0.0311654		49.7987	34.3674	15.8339
cpx	Bishop Creek	SNB-18-27B	18-27B-cpx3-c	49.7493	0.671014	2.54335	9.68212	0.19978	11.7741	23.6182	0.423727	0	0.001645	0.005451	98.6687	68.4311		units	1.89165	0.0191869	0.113976	4.94532e-05	0.0955441	0.212334	0.00643414	0.667407	0.962182	0.0312382		49.6619	34.4474	15.8908
cpx	Bishop Creek	SNB-18-27B	18-27B-cpx23-c	51.1449	0.60882	2.43769	10.075	0.212919	11.9874	23.7226	0.430718	0.005074	0.029241	0.000244	100.655	67.9578		units	1.90791	0.0170791	0.107174	0.000862429	0.0731365	0.241171	0.00672753	0.666638	0.948147	0.0311527		49.1499	34.5571	16.293
cpx	Bishop Creek	SNB-18-27B	18-27B-cpx15-c	51.6999	0.746894	2.60645	10.063	0.184468	11.824	23.7027	0.436196	0	0.016721	0.009288	101.29	67.6842		units	1.9186	0.0208437	0.113999	0.000490607	0.0380014	0.274304	0.00579833	0.654138	0.942436	0.0313852		49.3712	34.2682	16.3607
cpx	Bishop Creek	SNB-18-27B	18-27B-cpx5-r	49.5199	0.730577	2.84853	9.88725	0.201443	11.5875	23.6402	0.438763	0.000849	0.031545	0	98.8866	67.6276		units	1.88031	0.0208611	0.127475	0.000947013	0.101536	0.212429	0.0064787	0.655917	0.961744	0.0323018		49.7894	33.9567	16.2539
cpx	Bishop Creek	SNB-18-27B	18-27B-cpx19-r	51.529	0.0473	0.634059	10.1098	0.216267	11.8091	24.1096	0.334768	0.009428	0.016913	0	98.8162	67.5551		units	1.96211	0.00135442	0.0284549	0.000509176	0.0688238	0.253112	0.00697506	0.670345	0.983601	0.0247151		49.7804	33.9264	16.2933
cpx	Bishop Creek	SNB-18-27B	18-27B-cpx11-c	50.9683	0.334738	2.56266	9.8488	0.2066	11.4733	23.9642	0.535977	0.006703	0.041659	0.03641	99.9793	67.4959		units	1.91424	0.00945415	0.113434	0.00123703	0.0769675	0.232372	0.00657223	0.642382	0.964311	0.0390292		50.3285	33.5267	16.1448
cpx	Bishop Creek	SNB-18-27B	18-27B-cpx14-c	52.5878	0.058011	0.787086	10.2067	0.227111	11.7611	24.4649	0.259859	0	0.041321	0	100.394	67.2558		units	1.97385	0.00163742	0.0348183	0.00122624	0.0318826	0.288502	0.00722028	0.65809	0.983857	0.018911		50.1371	33.5361	16.3267
cpx	Bishop Creek	SNB-18-27B	18-27B-cpx5-r	50.9415	0.740229	3.05784	10.1574	0.191992	11.4413	23.6917	0.444054	0.002007	0.019659	0	100.688	66.7536		units	1.90301	0.0207949	0.134629	0.000580639	0.0493441	0.267983	0.00607489	0.637169	0.948252	0.0321627		49.8359	33.4868	16.6773
cpx	Bishop Creek	SNB-18-27B	18-27B-cpx13-c	50.4736	0.699687	2.7397	10.31	0.209478	11.5791	23.7732	0.492005	0.003802	0.023852	0	100.304	66.6882		units	1.89157	0.0197189	0.121009	0.000706739	0.0914517	0.231675	0.00664941	0.646906	0.954561	0.0357499		49.5981	33.6126	16.7893
cpx	Bishop Creek	SNB-18-27B	18-27B-cpx13-c	50.5486	0.704257	2.78081	10.2246	0.210841	11.3832	23.8103	0.454506	0	0.011117	0.007635	100.136	66.4937		units	1.89934	0.0198996	0.123146	0.00033026	0.0711597	0.250128	0.00671018	0.637625	0.958552	0.0331116		49.9906	33.2536	16.7559
cpx	Bishop Creek	SNB-18-27B	18-27B-cpx1-r	50.4198	0.696443	3.00738	10.2714	0.184761	11.4257	23.6968	0.44136	0.00568	0.03695	0	100.186	66.4748		units	1.89297	0.0196629	0.133072	0.00109681	0.0727026	0.249797	0.00587541	0.63949	0.95321	0.0321279		49.7708	33.3902	16.839
cpx	Bishop Creek	SNB-18-27B	18-27B-cpx21-r	52.2291	0.107027	1.14754	10.5784	0.215307	11.72	24.0798	0.326027	0	0.019453	0	100.423	66.3853		units	1.95964	0.00301979	0.0507443	0.000577066	0.0470809	0.284843	0.00684238	0.655539	0.967998	0.0237172		49.5023	33.5235	16.9742
cpx	Bishop Creek	SNB-18-27B	18-27B-cpx13-r	51.0068	0.349551	1.58901	10.5309	0.212525	11.6519	23.7094	0.342262	0.000378	0.013632	0.020097	99.4264	66.3557		units	1.93251	0.0099592	0.0709538	0.000408346	0.0688489	0.264818	0.00682007	0.658109	0.962435	0.0251419		49.2493	33.6765	17.0742
cpx	Bishop Creek	SNB-18-27B	18-27B-cpx13-c	50.3956	0.594529	2.62414	10.4115	0.187233	11.3431	23.9558	0.364106	0.002577	0.024649	0	99.9032	66.0099		units	1.89988	0.0168549	0.116594	0.000734695	0.0758244	0.252422	0.00597862	0.637492	0.96761	0.0266138		50.0484	32.9734	16.9781
cpx	Bishop Creek	SNB-18-27B	18-27B-cpx14-r	52.1395	0.077936	0.94855	10.7811	0.212295	11.6562	23.8866	0.358981	0	0.019482	0	100.081	65.8378		units	1.96396	0.00220762	0.0421097	0.000580197	0.0511901	0.288424	0.00677317	0.654535	0.964003	0.0262171		49.2302	33.4262	17.3436
cpx	Bishop Creek	SNB-18-27B	18-27B-cpx9-r	52.8107	0.197109	1.53706	10.8045	0.20978	11.6244	23.8896	0.358368	0.002459	0.01525	0	101.449	65.7275		units	1.96294	0.00550949	0.0673335	0.000448157	0.0211497	0.3147	0.00660442	0.644117	0.951374	0.0258262		49.2598	33.3508	17.3895
cpx	Bishop Creek	SNB-18-27B	18-27B-cpx18-c	50.6286	0.214219	1.32454	10.6922	0.218595	11.4809	23.8839	0.407915	0.002341	0.021363	0.00634	98.8809	65.6831		units	1.92889	0.00613747	0.0594744	0.0006435	0.0999683	0.240702	0.00705402	0.652073	0.97493	0.0301319		49.5474	33.1393	17.3133
cpx	Bishop Creek	SNB-18-27B	18-27B-cpx6-r	51.2178	0.391991	3.36295	10.4821	0.212582	11.2435	22.4765	0.436494	0.152867	0.008987	0.010594	99.9964	65.6594		units	1.93059	0.0111113	0.149398	0.00026783	0	0.330425	0.00678704	0.6318	0.907724	0.0319002		48.5427	33.787	17.6703
cpx	Bishop Creek	SNB-18-27B	18-27B-cpx10-c	52.8265	0.348702	1.53338	10.7888	0.211102	11.5422	23.7434	0.446363	0	0.024117	0.028389	101.493	65.6004		units	1.96331	0.00974568	0.0671648	0.000708657	0.0181812	0.317143	0.00664531	0.639491	0.945447	0.0321642		49.2353	33.3023	17.4624
cpx	Bishop Creek	SNB-18-27B	18-27B-cpx7-r	50.685	0.659424	3.1159	10.5826	0.211085	11.2872	23.638	0.43337	0.014305	0.00894	0	100.636	65.5315		units	1.89686	0.0185584	0.137434	0.000264526	0.0629144	0.268297	0.00669111	0.629723	0.947814	0.0314457		49.6563	32.9914	17.3523
cpx	Bishop Creek	SNB-18-27B	18-27B-cpx4-r	49.3639	0.591897	2.64055	10.5295	0.221566	11.1934	23.5681	0.406506	0.006701	0	0.008957	98.531	65.4567		units	1.88699	0.0170148	0.118962	0	0.10315	0.233456	0.0071738	0.637866	0.965255	0.0301283		49.7624	32.8843	17.3533
cpx	Bishop Creek	SNB-18-27B	18-27B-cpx18-c	50.2507	0.293144	1.72805	10.8287	0.213642	11.463	23.5179	0.48507	0.021428	0.026518	0	98.8282	65.3613		units	1.91446	0.00839856	0.0775916	0.000798766	0.111733	0.23328	0.00689407	0.651045	0.959974	0.0358306		49.0776	33.284	17.6384
cpx	Bishop Creek	SNB-18-27B	18-27B-cpx21-r	52.8305	0.196287	1.29421	10.9436	0.213967	11.5696	23.7276	0.458396	0	0.01257	0.010889	101.258	65.3319		units	1.96752	0.00549728	0.0568063	0.000370123	0.0298804	0.31096	0.00674945	0.642338	0.946774	0.0330996		49.0569	33.2826	17.6606
cpx	Bishop Creek	SNB-18-27B	18-27B-cpx2	51.7485	0.176203	1.14246	10.8304	0.211882	11.4283	23.4857	0.463481	0	0.013044	0.029283	99.5293	65.2888		units	1.96067	0.00502043	0.0510157	0.000390745	0.0512534	0.291916	0.00679966	0.645499	0.953384	0.0340476		49.0916	33.238	17.6705
cpx	Bishop Creek	SNB-18-27B	18-27B-cpx18-r	51.3982	0.215119	1.31973	10.9295	0.211024	11.5288	23.7301	0.449082	0	0.01618	0.002965	99.8008	65.2809		units	1.94085	0.00610862	0.0587335	0.000483056	0.0797477	0.265397	0.00674934	0.648987	0.960067	0.0328788		49.1284	33.2099	17.6617
cpx	Bishop Creek	SNB-18-27B	18-27B-cpx18-r	51.171	0.212427	1.32127	10.8771	0.206183	11.4658	23.6591	0.452195	0	0.019229	0.010113	99.3944	65.2657		units	1.94027	0.00605717	0.0590452	0.000576463	0.0809612	0.26395	0.00662182	0.648114	0.961157	0.0332439		49.1846	33.1655	17.6499
cpx	Bishop Creek	SNB-18-27B	18-27B-cpx8-r	52.5076	0.242297	1.34305	10.8962	0.218957	11.4417	23.6585	0.488547	0	0.041499	0.007296	100.846	65.1783		units	1.96372	0.00681436	0.0591978	0.00122707	0.033937	0.306853	0.00693587	0.637907	0.947986	0.035425		49.203	33.1091	17.6879
cpx	Bishop Creek	SNB-18-27B	18-27B-cpx5-r	49.3038	0.710268	2.96058	10.63	0.198136	11.1211	23.5677	0.416894	0	0.035434	0.006553	98.9505	65.0944		units	1.87733	0.0203378	0.13286	0.00106673	0.10151	0.236984	0.00639013	0.631271	0.96147	0.0307775		49.7852	32.6874	17.5273
cpx	Bishop Creek	SNB-18-27B	18-27B-cpx2	51.3816	0.640956	2.46997	10.756	0.209332	11.2435	23.5868	0.413845	0	0.00107	0	100.703	65.0754		units	1.92471	0.0180554	0.109045	3.16896e-05	0.0354454	0.301504	0.0066417	0.627867	0.946641	0.0300568		49.5246	32.8476	17.6279
cpx	Bishop Creek	SNB-18-27B	18-27B-cpx14-c	51.9223	0.203986	1.09726	11.0712	0.22536	11.5277	23.6864	0.433978	0	0.024855	0.003567	100.197	64.9861		units	1.95486	0.0057754	0.0486884	0.000739861	0.0609825	0.287606	0.0071866	0.647009	0.955473	0.0316793		48.9717	33.1617	17.8665
cpx	Bishop Creek	SNB-18-27B	18-27B-cpx13-r	49.6874	0.7326	2.9977	10.6572	0.209174	11.0894	23.6519	0.421599	0	0.021161	0.002685	99.4708	64.9715		units	1.88267	0.0208745	0.133867	0.000633929	0.0893786	0.248319	0.00671309	0.626392	0.960178	0.0309724		49.8984	32.5522	17.5494
cpx	Bishop Creek	SNB-18-27B	18-27B-cpx14-r	52.6895	0.158074	1.10634	10.9947	0.222841	11.4218	23.7936	0.447409	0.002518	0.018947	0	100.856	64.934		units	1.97158	0.00444806	0.0487901	0.000560538	0.0310606	0.312995	0.00706269	0.637136	0.953911	0.0324594		49.2951	32.9252	17.7797
cpx	Bishop Creek	SNB-18-27B	18-27B-cpx9-c	52.8466	0.27588	1.53615	10.9388	0.229806	11.3462	23.8047	0.464075	0.004551	0.029485	0.007067	101.483	64.8988		units	1.96548	0.00771601	0.0673349	0.000867019	0.0188671	0.321367	0.00723934	0.629086	0.948576	0.0334647		49.4592	32.8008	17.7399
cpx	Bishop Creek	SNB-18-27B	18-27B-cpx9-r	52.1323	0.280787	1.45199	10.9179	0.214523	11.3124	23.8116	0.459667	0.004734	0.022647	0	100.609	64.8745		units	1.95522	0.00791931	0.0641812	0.000671546	0.0422884	0.300153	0.00681474	0.632491	0.956833	0.0334257		49.5315	32.7416	17.7268
cpx	Bishop Creek	SNB-18-27B	18-27B-cpx13-r	51.3927	0.354689	1.87308	10.877	0.226403	11.2248	23.6963	0.449587	0.002419	0.041169	0	100.138	64.783		units	1.93603	0.010048	0.0831617	0.00122619	0.0562863	0.286383	0.00722403	0.630377	0.956422	0.0328377		49.5692	32.671	17.7598
cpx	Bishop Creek	SNB-18-27B	18-27B-cpx16-r	51.8323	0.46023	2.30761	10.9543	0.246721	11.3046	23.7898	0.458115	0	0.020037	0	101.374	64.7828		units	1.92841	0.0128764	0.101185	0.000589394	0.0487068	0.292124	0.00777481	0.62699	0.948302	0.033046		49.4907	32.7218	17.7875
cpx	Bishop Creek	SNB-18-27B	18-27B-cpx16-c	51.1166	0.653603	3.09154	10.8829	0.201989	11.19	23.8028	0.405453	0.001603	0.028664	0	101.375	64.6997		units	1.90171	0.0182859	0.135554	0.000843131	0.0528575	0.285738	0.00636497	0.620615	0.948785	0.0292462		49.7268	32.5271	17.7462
cpx	Bishop Creek	SNB-18-27B	18-27B-cpx10-r	52.5591	0.27685	1.53888	11.1108	0.236142	11.3969	23.7038	0.480889	0	0.019856	0	101.323	64.6445		units	1.95737	0.00775337	0.0675437	0.000584645	0.0363443	0.309696	0.00744877	0.632732	0.945802	0.034723		49.1435	32.8764	17.9801
cpx	Bishop Creek	SNB-18-27B	18-27B-cpx9-c	51.9529	0.404125	2.09795	10.9246	0.245285	11.1927	23.9123	0.422241	0.000479	0.031108	0	101.184	64.6175		units	1.93814	0.0113374	0.0922417	0.000917535	0.03843	0.302401	0.00775054	0.622469	0.955774	0.030541		49.8039	32.4359	17.7602
cpx	Bishop Creek	SNB-18-27B	18-27B-cpx18-r	50.8052	0.326518	1.72095	10.9979	0.198877	11.2215	23.7018	0.48003	0	0.008455	0.005805	99.467	64.5236		units	1.92617	0.00930922	0.0768969	0.00025344	0.087186	0.261512	0.0063864	0.634228	0.962776	0.0352859		49.4822	32.5964	17.9215
cpx	Bishop Creek	SNB-18-27B	18-27B-cpx23-c	51.3717	0.47894	2.31621	11.142	0.219038	11.3645	23.623	0.436141	0.003224	0.002755	0.030369	100.988	64.5154		units	1.91928	0.013456	0.101988	8.13786e-05	0.0640602	0.284062	0.00693136	0.632955	0.945598	0.0315927		49.0792	32.8522	18.0686
cpx	Bishop Creek	SNB-18-27B	18-27B-cpx6-r	49.7411	0.626652	2.73088	10.7752	0.224094	10.9854	23.6483	0.455664	0	0.01973	0.014147	99.2212	64.5048		units	1.89049	0.0179105	0.122326	0.000592874	0.0938528	0.248633	0.00721399	0.622418	0.962982	0.0335777		49.9501	32.285	17.7648
cpx	Bishop Creek	SNB-18-27B	18-27B-cpx21-r	52.2144	0.278647	1.56666	11.11	0.211589	11.3184	23.7613	0.487238	0	0.018829	0.01094	100.978	64.4881		units	1.95137	0.00783111	0.0690048	0.000556354	0.0473484	0.299882	0.00669772	0.63058	0.951427	0.035305		49.3162	32.6855	17.9983
cpx	Bishop Creek	SNB-18-27B	18-27B-cpx9-c	52.7099	0.281253	1.52715	11.1266	0.240667	11.309	23.7896	0.498121	0.001178	0.015682	0	101.499	64.4349		units	1.96028	0.00786581	0.0669366	0.000461108	0.0322328	0.313822	0.00758102	0.626989	0.947917	0.0359176		49.346	32.6393	18.0147
cpx	Bishop Creek	SNB-18-27B	18-27B-cpx6-r	49.9823	0.70055	2.84848	10.9004	0.195986	11.0785	23.5136	0.436175	0	0.01177	0.014068	99.6818	64.4336		units	1.89128	0.0199342	0.127031	0.00035212	0.0821961	0.262739	0.0062813	0.624923	0.953268	0.0319997		49.5687	32.4952	17.9362
cpx	Bishop Creek	SNB-18-27B	18-27B-cpx16-c	51.3824	0.53858	2.55123	11.0178	0.205093	11.1965	23.8478	0.431308	0	0.018114	0.01007	101.199	64.431		units	1.91592	0.015102	0.112116	0.000534014	0.0564879	0.28708	0.00647738	0.622376	0.952726	0.0311815		49.6556	32.4379	17.9066
cpx	Bishop Creek	SNB-18-27B	18-27B-cpx23-c	51.3131	0.418757	2.13584	11.0698	0.207075	11.1723	23.8795	0.464257	0	0.015072	0	100.676	64.2732		units	1.92309	0.011802	0.0943403	0.0004466	0.0691541	0.277798	0.00657334	0.624198	0.958858	0.0337348		49.6816	32.3417	17.9767
cpx	Bishop Creek	SNB-18-27B	18-27B-cpx16-r	52.2532	0.305696	1.55896	11.1544	0.236273	11.2542	23.7391	0.468392	0.007005	0.032925	0	101.01	64.2662		units	1.95349	0.00859425	0.0686893	0.000973192	0.0401263	0.308611	0.00748165	0.627218	0.950868	0.0339511		49.349	32.5519	18.0991
cpx	Bishop Creek	SNB-18-27B	18-27B-cpx23-c	51.7214	0.385549	2.12503	11.0479	0.211637	11.1456	23.7816	0.472383	0	0.030345	0	100.921	64.2638		units	1.93406	0.0108418	0.0936526	0.000897144	0.049898	0.295593	0.00670312	0.621314	0.952793	0.0342484		49.635	32.3669	17.9981
cpx	Bishop Creek	SNB-18-27B	18-27B-cpx15-r	50.9476	0.454652	2.28	11.062	0.207704	11.1476	23.8167	0.430208	0.004903	0.024661	0	100.376	64.2387		units	1.91545	0.0128542	0.101027	0.000733048	0.0729962	0.274807	0.00661419	0.624791	0.959369	0.0313597		49.6577	32.3397	18.0026
cpx	Bishop Creek	SNB-18-27B	18-27B-cpx14-r	52.9199	0.133678	1.07291	11.3268	0.235619	11.4038	23.7236	0.441074	0.004432	0.018964	0.002774	101.283	64.2172		units	1.97379	0.00374941	0.047163	0.000559226	0.0290973	0.324204	0.00744351	0.634074	0.948025	0.0318963		48.9834	32.7619	18.2547
cpx	Bishop Creek	SNB-18-27B	18-27B-cpx15-r	52.0181	0.339201	1.80858	11.1341	0.236896	11.1862	23.7517	0.439594	0	0.018128	0.018965	100.951	64.1687		units	1.94629	0.00954401	0.0797529	0.000536263	0.0399306	0.308458	0.00750752	0.623939	0.95215	0.0318898		49.4758	32.4212	18.103
cpx	Bishop Creek	SNB-18-27B	18-27B-cpx23-r	50.5889	0.362419	1.8388	11.1233	0.228119	11.1692	23.7112	0.447601	0	0.029929	0	99.4995	64.1562		units	1.91859	0.0103362	0.08219	0.000897419	0.091967	0.260823	0.00732782	0.631479	0.963474	0.0329129		49.4662	32.4211	18.1128
cpx	Bishop Creek	SNB-18-27B	18-27B-cpx14-c	51.2451	0.255372	1.18132	11.2423	0.214227	11.2707	23.6074	0.465456	0	0.028209	0	99.51	64.1194		units	1.94418	0.00728583	0.0528213	0.000846151	0.0776321	0.279063	0.00688406	0.637446	0.9596	0.0342382		49.116	32.627	18.257
cpx	Bishop Creek	SNB-18-27B	18-27B-cpx4-r	49.2737	0.666388	2.78768	10.9019	0.198575	10.9074	23.5096	0.49304	0	0.013914	0.019977	98.7722	64.0731		units	1.88137	0.019134	0.125446	0.000420035	0.109627	0.238481	0.00642198	0.620853	0.961748	0.0364995		49.8132	32.1567	18.0301
cpx	Bishop Creek	SNB-18-27B	18-27B-cpx8-r	52.3894	0.137278	1.01631	11.2982	0.208531	11.2595	23.8066	0.400211	0.003688	0.020297	0	100.54	63.9822		units	1.96953	0.00388098	0.0450301	0.000603291	0.0367079	0.318503	0.00664012	0.631024	0.958905	0.0291713		49.2975	32.4411	18.2615
cpx	Bishop Creek	SNB-18-27B	18-27B-cpx22-r	50.5067	0.435542	2.16028	11.1768	0.229964	11.0815	23.7829	0.42173	0.000862	0.014234	0	99.8105	63.8641		units	1.91038	0.0123886	0.0963022	0.00042567	0.0886635	0.26488	0.00736743	0.624853	0.963812	0.030928		49.6245	32.1723	18.2032
cpx	Bishop Creek	SNB-18-27B	18-27B-cpx16-c	51.2591	0.527208	2.56028	11.1781	0.212905	11.0669	23.7599	0.437506	0.004595	0.009489	0	101.016	63.8309		units	1.91601	0.0148194	0.11279	0.000280429	0.0569787	0.292445	0.0067406	0.616684	0.951546	0.0317072		49.6203	32.1583	18.2214
cpx	Bishop Creek	SNB-18-27B	18-27B-cpx15-r	51.6126	0.361237	1.97663	11.243	0.222941	11.0573	23.7993	0.416246	0.00221	0.023213	0	100.715	63.6771		units	1.93644	0.0101921	0.0874038	0.000688582	0.048914	0.303851	0.00708476	0.618452	0.956689	0.0302793		49.6232	32.079	18.2978
cpx	Bishop Creek	SNB-18-28	18-28-cpx6-exo	51.0537	0.549596	1.99265	10.8688	0.331732	13.0831	21.5294	0.268216	0.002879	0.121308	0.006406	99.8078	68.2102		units	1.91981	0.0155416	0.0883115	0.00360658	0.0569384	0.284859	0.0105658	0.733413	0.867401	0.0195552		44.6513	37.754	17.5947
cpx	Bishop Creek	SNB-18-28	18-28-cpx5-exo	51.6047	0.505377	1.70733	11.0602	0.334576	12.9407	21.3382	0.262361	0.027664	0.040657	0	99.8217	67.5914		units	1.94324	0.0143111	0.075772	0.00121045	0.0270783	0.321223	0.0106713	0.726446	0.860897	0.019155		44.476	37.5299	17.9941
cpx	Bishop Creek	SNB-18-28	18-28-cpx12	51.2745	0.573544	1.85085	11.1817	0.332738	12.835	21.8821	0.304846	0.002269	0.108477	0	100.346	67.1711		units	1.92083	0.0161575	0.0817172	0.00321293	0.0632354	0.287073	0.0105579	0.716792	0.878282	0.0221419		45.147	36.8458	18.0072
cpx	Bishop Creek	SNB-18-28	18-28-cpx1-exo	52.352	0.280946	1.07267	11.5195	0.412341	13.0775	20.8445	0.27145	0.038623	0.070592	0	99.94	66.9269		units	1.97144	0.00795597	0.0476071	0.00210175	0.0113253	0.351451	0.013152	0.734145	0.841006	0.0198192		43.3972	37.883	18.7198
cpx	Bishop Creek	SNB-18-28	18-28-cpx12	51.6296	0.478198	1.86598	11.9652	0.364021	13.4975	19.4266	0.2499	0.004816	0.070316	0.008257	99.5603	66.7861		units	1.94868	0.0135728	0.0830051	0.00209832	0.00867768	0.368997	0.0116373	0.759455	0.785589	0.0182875		40.8582	39.499	19.6428
cpx	Bishop Creek	SNB-18-28	18-28-cpx19	50.8838	0.27525	1.07029	11.407	0.360905	12.8252	22.1229	0.258233	0.002203	0.005878	0	99.2117	66.7125		units	1.92879	0.00784609	0.0478147	0.000176161	0.0977156	0.263888	0.0115873	0.72473	0.898474	0.0189786		45.2676	36.5139	18.2186
cpx	Bishop Creek	SNB-18-28	18-28-cpx7-exo	52.2714	0.224282	0.954839	11.1987	0.351743	12.5616	22.5239	0.241871	0.007663	0.001291	0	100.337	66.6607		units	1.96219	0.00633128	0.0422437	3.83158e-05	0.0382863	0.313273	0.0111837	0.70296	0.905893	0.0176038		46.2093	35.8578	17.9329
cpx	Bishop Creek	SNB-18-28	18-28-cpx6-exo	50.4429	0.619945	2.13001	11.1863	0.35906	12.5056	21.7048	0.306082	0.006817	0.143193	0.004435	99.4092	66.586		units	1.90922	0.0176453	0.095015	0.00428501	0.0694391	0.284637	0.0115109	0.705617	0.880173	0.0224615		45.3729	36.3745	18.2526
cpx	Bishop Creek	SNB-18-28	18-28-cpx13-r	51.4439	0.213012	0.973721	11.397	0.305839	12.667	22.1623	0.261765	0.002863	0.005092	0	99.4325	66.456		units	1.94712	0.00606295	0.043436	0.000152378	0.0692485	0.2915	0.00980478	0.714729	0.898733	0.0192096		45.5237	36.2033	18.273
cpx	Bishop Creek	SNB-18-28	18-28-cpx2-exo	52.5606	0.208527	0.984351	11.5927	0.416392	12.6418	22.5462	0.255921	0.009333	0.017952	0.017351	101.251	66.0308		units	1.95688	0.0058383	0.0431925	0.000528435	0.0493223	0.311624	0.0131308	0.70165	0.899363	0.0184738		45.84	35.7627	18.3972
cpx	Bishop Creek	SNB-18-28	18-28-cpx9-alt	52.2144	0.156623	0.84512	11.5792	0.350186	12.5691	22.2068	0.237744	0.005782	0	0	100.165	65.9273		units	1.9648	0.00443205	0.0374802	0	0.0413964	0.322992	0.0111613	0.705083	0.895307	0.0173454		45.5678	35.8861	18.546
cpx	Bishop Creek	SNB-18-28	18-28-cpx1-exo	52.8306	0.379789	1.14404	11.4603	0.441197	12.4315	22.0754	0.285003	0.024181	0.024401	0	101.096	65.9121		units	1.97169	0.010659	0.0503211	0.000720005	0.00489158	0.352795	0.0139467	0.691647	0.882711	0.0206228		45.6879	35.7987	18.5134
cpx	Bishop Creek	SNB-18-28	18-28-cpx8-exo	51.6003	0.545792	1.58138	11.4209	0.397538	12.3868	22.0583	0.284475	0.015671	0.01955	0	100.311	65.9084		units	1.93934	0.0154259	0.0700475	0.000580929	0.0405773	0.318392	0.0126551	0.694013	0.888243	0.0207297		45.7568	35.7513	18.4919
cpx	Bishop Creek	SNB-18-28	18-28-cpx4-exo	51.6087	0.385708	1.34898	12.0275	0.510817	13.0385	19.8491	0.270634	0.010849	0.006628	0	99.0574	65.8979		units	1.96205	0.0110273	0.0604436	0.000199226	0.013144	0.369256	0.016449	0.738968	0.80851	0.0199488		41.8944	38.2909	19.8147
cpx	Bishop Creek	SNB-18-28	18-28-cpx1-exo	52.3218	0.282951	1.14418	11.5616	0.452841	12.4906	21.8359	0.265313	0.035138	0.034144	0	100.424	65.8207		units	1.96527	0.00799231	0.0506512	0.00101398	0.0211252	0.342049	0.0144069	0.69941	0.878756	0.0193217		45.2654	36.0272	18.7074
cpx	Bishop Creek	SNB-18-28	18-28-cpx17-r	51.5702	0.170011	0.85153	11.609	0.377568	12.5129	21.9758	0.272489	0.005568	0	0	99.3451	65.7687		units	1.95606	0.00484933	0.0380662	0	0.060152	0.308093	0.0121301	0.707538	0.893071	0.0200392		45.36	35.9366	18.7035
cpx	Bishop Creek	SNB-18-28	18-28-cpx9-alt	52.0906	0.19339	0.888873	11.7268	0.364655	12.577	22.0843	0.25367	0.004329	0	0.001579	100.185	65.6565		units	1.9601	0.00547234	0.0394197	0	0.0479513	0.321072	0.0116221	0.705512	0.890348	0.0185069		45.313	35.906	18.7809
cpx	Bishop Creek	SNB-18-28	18-28-cpx9-alt	52.0861	0.198095	0.919364	11.7674	0.382968	12.6195	21.9186	0.26872	0.000621	0.021235	0	100.183	65.6545		units	1.95963	0.00560462	0.0407657	0.000631654	0.0477379	0.322508	0.0122039	0.707787	0.883531	0.0196019		45.0422	36.0828	18.875
cpx	Bishop Creek	SNB-18-28	18-28-cpx13-r	51.5789	0.187721	0.867469	11.7975	0.421763	12.6134	22.0404	0.262831	0.000309	0.003909	0.003001	99.7772	65.586		units	1.94828	0.00533227	0.0386179	0.00011674	0.0732956	0.299375	0.0134938	0.710261	0.891982	0.0192487		45.1656	35.9641	18.8702
cpx	Bishop Creek	SNB-18-28	18-28-cpx8-exo	51.4134	0.542913	1.61462	11.5964	0.384583	12.3566	21.6683	0.268567	0.009886	0.005093	0	99.8604	65.5098		units	1.94178	0.0154197	0.0718707	0.000152081	0.0332369	0.333036	0.0123027	0.695717	0.876815	0.0196664		45.2245	35.8838	18.8917
cpx	Bishop Creek	SNB-18-28	18-28-cpx1-exo	51.0842	0.607111	1.90996	11.4507	0.429998	12.0897	22.0202	0.298114	0.006064	0.047867	0	99.9439	65.3018		units	1.92837	0.0172342	0.0849735	0.00142861	0.0442079	0.317278	0.0137485	0.680341	0.8906	0.0218189		46.0871	35.2066	18.7063
cpx	Bishop Creek	SNB-18-28	18-28-cpx8-exo	51.8714	0.419216	1.27205	11.7401	0.412455	12.3711	21.7642	0.261639	0.019844	0.017089	0	100.149	65.2576		units	1.95492	0.0118812	0.0565018	0.000509207	0.0284966	0.341526	0.0131663	0.695052	0.878824	0.0191184		45.2094	35.7555	19.0351
cpx	Bishop Creek	SNB-18-28	18-28-cpx5-exo	51.7625	0.322096	1.1667	12.1044	0.403491	12.6722	21.8074	0.255203	0.003805	0	0.014622	100.512	65.1099		units	1.9424	0.00908927	0.0515984	0	0.0639949	0.315862	0.0128246	0.708897	0.876768	0.0185676		44.6074	36.0666	19.326
cpx	Bishop Creek	SNB-18-28	18-28-cpx19	50.7559	0.273057	1.06452	12.3342	0.3801	12.9087	21.2468	0.261654	0.003584	0	0	99.2285	65.1026		units	1.92681	0.00779517	0.0476278	0	0.102427	0.289151	0.0122218	0.730535	0.864177	0.0192586		43.5071	36.7789	19.7141
cpx	Bishop Creek	SNB-18-28	18-28-cpx13-r	51.6378	0.172948	0.849542	12.3052	0.393398	12.8006	21.207	0.238683	0.000438	0.007763	0	99.6135	64.965		units	1.95475	0.00492334	0.0379022	0.000232343	0.0600311	0.329525	0.0126137	0.722377	0.860124	0.0175183		43.6156	36.6306	19.7538
cpx	Bishop Creek	SNB-18-28	18-28-cpx7-exo	52.0764	0.27894	1.02142	12.3749	0.346101	12.8605	21.1263	0.252459	0.004021	0.010923	0	100.352	64.9426		units	1.95708	0.00788312	0.0452405	0.000324552	0.042911	0.346013	0.0110168	0.720496	0.850643	0.0183952		43.3987	36.7588	19.8424
cpx	Bishop Creek	SNB-18-28	18-28-cpx11	52.1441	0.134582	0.809067	12.1098	0.393113	12.5692	21.7354	0.228408	0.0014	0.02528	0	100.15	64.9141		units	1.96497	0.00381381	0.0359328	0.000753188	0.042429	0.339203	0.0125474	0.706102	0.877558	0.0166882		44.6528	35.9286	19.4186
cpx	Bishop Creek	SNB-18-28	18-28-cpx18	50.9937	0.207808	0.94493	12.2075	0.384065	12.6262	21.5349	0.239335	0	0.011109	0	99.1496	64.834		units	1.93955	0.00594383	0.0423583	0.000334067	0.0839764	0.304323	0.012373	0.715919	0.877576	0.0176497		44.2819	36.1248	19.5933
cpx	Bishop Creek	SNB-18-28	18-28-cpx9-alt	52.5089	0.10174	0.712958	12.3397	0.451074	12.7214	20.6847	0.16196	0.017388	0	0	99.6998	64.7598		units	1.98958	0.00289895	0.0318382	0	0	0.39101	0.0144765	0.718574	0.839722	0.0118983		43.078	36.8631	20.0589
cpx	Bishop Creek	SNB-18-28	18-28-cpx1-exo	51.8038	0.402745	1.42603	12.0385	0.420043	12.3319	22.0957	0.299247	0.023206	0.076275	0	100.917	64.6137		units	1.93824	0.0113318	0.0628825	0.00225634	0.0574263	0.319257	0.0133115	0.687834	0.885753	0.0217082		45.4169	35.2687	19.3144
cpx	Bishop Creek	SNB-18-28	18-28-cpx17-r	51.742	0.130015	0.991936	12.043	0.554937	12.3286	21.9029	0.241738	0.030003	0.037018	0	100.002	64.5992		units	1.95448	0.00369318	0.0441597	0.00110554	0.0561	0.324333	0.0177548	0.69424	0.886434	0.0177043		45.2007	35.4004	19.3989
cpx	Bishop Creek	SNB-18-28	18-28-cpx1-r	52.5492	0.108011	0.807565	12.1812	0.4817	12.4173	21.7885	0.233006	0.013026	0.027147	0	100.607	64.5021		units	1.97357	0.00305052	0.0357453	0.000806088	0.0271828	0.355404	0.0153231	0.695216	0.876739	0.0169668		44.8565	35.5693	19.5743
cpx	Bishop Creek	SNB-18-28	18-28-cpx2-exo	53.0641	0.058572	0.610153	12.2338	0.479318	12.4484	21.8899	0.2364	0.003012	0.005884	0.010473	101.04	64.4608		units	1.98485	0.00164755	0.0268981	0.000174011	0.0170704	0.365618	0.0151858	0.694146	0.877262	0.0171444		44.8935	35.5226	19.5839
cpx	Bishop Creek	SNB-18-28	18-28-cpx11	52.3029	0.159083	0.862858	12.2684	0.413358	12.4723	21.9376	0.264006	0.001993	0.005494	0	100.688	64.4401		units	1.96142	0.00448632	0.0381365	0.000162896	0.0490775	0.335681	0.0131298	0.697269	0.881439	0.0191958		44.892	35.5121	19.5959
cpx	Bishop Creek	SNB-18-28	18-28-cpx5-exo	51.2561	0.428353	1.39449	12.456	0.334931	12.6604	21.2494	0.300797	0	0	0	100.081	64.4352		units	1.93153	0.0121389	0.0619337	0	0.0727089	0.319839	0.0106905	0.711235	0.857948	0.0219774		43.7342	36.2555	20.0103
cpx	Bishop Creek	SNB-18-28	18-28-cpx5-exo	51.9818	0.282875	1.01027	12.0505	0.454929	12.226	22.0804	0.281251	0.014929	0.012385	0	100.395	64.3936		units	1.95629	0.00800565	0.0448101	0.000368513	0.0467573	0.332507	0.0145014	0.685922	0.890318	0.0205221		45.5288	35.0765	19.3947
cpx	Bishop Creek	SNB-18-28	18-28-cpx5-exo	51.6312	0.322393	1.16284	12.2371	0.403393	12.4095	21.7916	0.278787	0.005033	0.022651	0.020771	100.285	64.3827		units	1.94421	0.0091293	0.051607	0.000674363	0.0613931	0.323967	0.0128661	0.696616	0.879182	0.020354		44.8297	35.5206	19.6496
cpx	Bishop Creek	SNB-18-28	18-28-cpx1-exo	51.7374	0.471647	1.58073	11.8448	0.453806	11.9899	21.9932	0.291906	0.047053	0.064217	0	100.475	64.3413		units	1.94685	0.0133464	0.0701037	0.00191053	0.0288916	0.343852	0.0144638	0.672592	0.886693	0.0212969		45.8944	34.8127	19.2929
cpx	Bishop Creek	SNB-18-28	18-28-cpx7-exo	52.1249	0.246992	0.983227	12.9243	0.351779	13.0491	20.2648	0.229033	0.004376	0.014017	0	100.193	64.2824		units	1.96334	0.00699608	0.0436476	0.000417428	0.0319801	0.375133	0.0112229	0.732726	0.817807	0.0167262		41.775	37.4289	20.796
cpx	Bishop Creek	SNB-18-28	18-28-cpx19	50.9251	0.118368	0.764901	12.4014	0.398268	12.5158	21.2901	0.24532	0.006818	0	0.000862	98.6669	64.2725		units	1.94801	0.00340498	0.0344842	0	0.0808743	0.315849	0.0129039	0.713719	0.872558	0.0181945		44.0019	35.9919	20.0062
cpx	Bishop Creek	SNB-18-28	18-28-cpx5-exo	51.2866	0.490065	2.22128	13.3163	0.305029	13.4119	17.2322	0.42417	0.172298	0	0	98.8598	64.226		units	1.95476	0.0140464	0.0997814	0	0	0.424452	0.00984731	0.762061	0.703703	0.0313457		37.2287	40.3161	22.4552
cpx	Bishop Creek	SNB-18-28	18-28-cpx14-r	51.6363	0.061888	0.591953	12.2879	0.570008	12.2956	21.9577	0.214943	0.002401	0.003388	0.009136	99.6313	64.0757		units	1.95936	0.00176598	0.0264729	0.000101643	0.0669827	0.322954	0.01832	0.695531	0.892696	0.0158136		45.1275	35.1604	19.712
cpx	Bishop Creek	SNB-18-28	18-28-cpx1-exo	51.184	0.479834	2.04738	12.1287	0.446227	12.1124	20.8802	0.255992	0.209585	0.06969	0	99.814	64.0303		units	1.94139	0.0136865	0.0915237	0.0020899	0.01505	0.369674	0.0143358	0.684883	0.848537	0.0188258		44.2374	35.7055	20.0571
cpx	Bishop Creek	SNB-18-28	18-28-cpx2-r	52.8617	0.061488	0.731692	12.5378	0.501782	12.4938	21.2853	0.238939	0.015281	0	0.009042	100.737	63.9804		units	1.98403	0.00173548	0.0323662	0	0.0134887	0.380047	0.0159517	0.699051	0.855942	0.0173877		43.9276	35.8758	20.1966
cpx	Bishop Creek	SNB-18-28	18-28-cpx14-r	50.766	0.46018	1.57682	12.2315	0.458244	12.1637	21.5538	0.308295	0	0.018188	0.009711	99.5464	63.9331		units	1.92613	0.0131299	0.07051	0.000545598	0.0731096	0.314996	0.0147263	0.687995	0.876182	0.0226791		44.8799	35.2405	19.8796
cpx	Bishop Creek	SNB-18-28	18-28-cpx17-r	51.6945	0.089078	0.659194	12.2971	0.553229	12.1546	22.1053	0.211924	0.025311	0.015919	0.004069	99.8103	63.7925		units	1.95965	0.00253936	0.0294512	0.000477117	0.0612718	0.328575	0.0177633	0.686883	0.897815	0.0155762		45.4695	34.7869	19.7436
cpx	Bishop Creek	SNB-18-28	18-28-cpx16-r	51.3186	0.172951	0.851296	13.1954	0.361447	13.0412	20.5073	0.224405	0.003178	0.003499	0.012063	99.6913	63.7903		units	1.94307	0.00492446	0.0379884	0.000104745	0.0823875	0.335436	0.0115916	0.736105	0.831917	0.0164738		41.8923	37.0676	21.0401
cpx	Bishop Creek	SNB-18-28	18-28-cpx3	52.4325	0.150165	0.84877	12.5444	0.514115	12.394	21.9209	0.245617	0.008448	0.01127	0.002571	101.073	63.7832		units	1.96156	0.00422465	0.0374237	0.00033335	0.0484842	0.343985	0.016291	0.691226	0.878654	0.0178159		44.7756	35.2244	20
cpx	Bishop Creek	SNB-18-28	18-28-cpx1-r	51.6053	0.43754	1.50179	12.1967	0.48667	12.0388	21.6727	0.269704	0.00301	0.079714	0	100.292	63.7607		units	1.94609	0.0124081	0.0667473	0.00237672	0.0336042	0.351048	0.0155449	0.676796	0.875667	0.0197198		45.2047	34.9383	19.8569
cpx	Bishop Creek	SNB-18-28	18-28-cpx17-r	51.4443	0.093482	1.62356	12.2174	0.553186	11.9932	20.7402	0.22366	0.055958	0.024243	0.011525	98.9808	63.6339		units	1.96602	0.00268657	0.0731264	0.000732506	0.00530832	0.385159	0.0179063	0.683273	0.84922	0.0165724		44.1621	35.5324	20.3055
cpx	Bishop Creek	SNB-18-28	18-28-cpx18	50.9617	0.287936	1.06374	13.1434	0.416737	12.7822	20.3474	0.271351	0	0.007233	0	99.2818	63.4173		units	1.93837	0.00823585	0.0476852	0.000217513	0.0789035	0.339174	0.0134258	0.72478	0.829201	0.0200111		42.0475	36.7525	21.2
cpx	Bishop Creek	SNB-18-28	18-28-cpx2-r	52.8564	0.048056	0.679378	12.694	0.441446	12.3405	21.763	0.215783	0.011479	0.008634	0.003721	101.062	63.4086		units	1.97923	0.00135322	0.0299824	0.000255615	0.0242574	0.373257	0.0140011	0.688873	0.873123	0.0156662		44.5582	35.1554	20.2864
cpx	Bishop Creek	SNB-18-28	18-28-cpx1-r	52.5534	0.059624	0.693118	12.6674	0.495081	12.2768	21.6425	0.224216	0.002138	0.021684	0	100.636	63.3373		units	1.97625	0.0016861	0.0307188	0.000644698	0.0291115	0.369257	0.015769	0.688235	0.871981	0.0163476		44.521	35.1394	20.3396
cpx	Bishop Creek	SNB-18-28	18-28-cpx5-exo	50.2207	0.703237	2.74212	13.2153	0.356989	12.7644	18.5665	0.447358	0.135062	0.009775	0.00478	99.1662	63.2582		units	1.91077	0.020121	0.122961	0.000294048	0.0479551	0.372539	0.0115045	0.723993	0.756856	0.0330011		39.8064	38.078	22.1156
cpx	Bishop Creek	SNB-18-28	18-28-cpx2-r	52.7416	0.049282	0.678003	12.8541	0.479966	12.3281	21.6272	0.228835	0.003531	0.015806	0	101.006	63.0939		units	1.97645	0.00138881	0.0299447	0.000468306	0.0305352	0.372302	0.0152345	0.688709	0.86834	0.0166265		44.3056	35.1403	20.5541
cpx	Bishop Creek	SNB-18-28	18-28-cpx1-r	52.5544	0.044578	0.633802	12.849	0.473704	12.2547	21.5834	0.197809	0.006995	0.013815	0	100.612	62.9639		units	1.97815	0.00126181	0.0281164	0.000411128	0.0270781	0.377383	0.0151023	0.687639	0.870419	0.0144359		44.3521	35.0386	20.6093
cpx	Bishop Creek	SNB-18-28	18-28-cpx1-r	51.9156	0.389624	1.41383	13.8571	0.504717	12.3577	19.8048	0.247456	0.002225	0.057949	0	100.551	61.3846		units	1.95801	0.0110505	0.0628448	0.00172798	0.015409	0.421655	0.0161232	0.694803	0.800286	0.0180951		41.4194	35.96	22.6206
cpx	Bishop Creek	SNB-18-28	18-28-cpx19	50.6875	0.252043	0.998707	15.0942	0.452862	13.3097	18.5198	0.197946	0.001585	0.002791	0.009187	99.5263	61.1166		units	1.92855	0.0072115	0.0447841	8.39587e-05	0.0982118	0.38207	0.0145943	0.754933	0.75496	0.0146024		37.9344	37.933	24.1326
cpx	Bishop Creek	SNB-18-28	18-28-cpx5-exo	51.7692	0.339724	1.10038	15.9367	0.571852	13.6872	15.5592	0.197435	0.003103	0.011124	0	99.1759	60.4886		units	1.97971	0.00976958	0.0495937	0.00033633	0	0.509662	0.0185224	0.780282	0.637489	0.0146386		33.0745	40.4829	26.4425
cpx	Bishop Creek	SNB-18-29	18-29-cpx19-c	53.7952	0.050553	0.544709	5.70475	0.215001	15.0939	25.0909	0.12634	0.007729	0.01329	0.011493	100.654	82.5061		units	1.97291	0.00139422	0.0235442	0.000385358	0.0364478	0.138519	0.00667867	0.825225	0.985913	0.00898362		49.6405	41.5499	8.80956
cpx	Bishop Creek	SNB-18-29	18-29-cpx	54.5065	0.014495	0.203846	5.72989	0.327359	14.6135	25.4091	0.138965	0.000443	0.019563	0	100.964	81.9695		units	1.99803	0.000399569	0.00880665	0.000566975	0.00364984	0.172003	0.010164	0.798577	0.997929	0.00987655		50.6008	40.4925	8.90663
cpx	Bishop Creek	SNB-18-29	18-29-cpx	53.7906	0	0.160479	5.81683	0.355133	14.5838	25.3482	0.113881	0	0.006658	0.026207	100.202	81.7154		units	1.98727	0	0.00698753	0.000194477	0.026441	0.153277	0.0111129	0.803208	1.00335	0.00815732		50.5142	40.4378	9.04798
cpx	Bishop Creek	SNB-18-29	18-29-cpx	53.7892	0	0.180981	5.88926	0.33955	14.4991	25.3445	0.141167	0.0002	0.007499	0.048709	100.24	81.442		units	1.98733	0	0.00788069	0.000219056	0.027349	0.154618	0.0106259	0.798594	1.00327	0.0101124		50.5724	40.2551	9.1725
cpx	Bishop Creek	SNB-18-29	18-29-cpx25	52.3285	0.098017	0.579572	6.03909	0.223065	14.4594	25.3846	0.175803	0.003975	0.01902	0.016832	99.3279	81.0171		units	1.94831	0.00274437	0.0254322	0.000559894	0.0845868	0.103452	0.00703456	0.802565	1.01262	0.0126909		50.5496	40.0636	9.3868
cpx	Bishop Creek	SNB-18-29	18-29-cpx	53.4994	0.035917	0.468855	6.13878	0.328548	14.3503	25.0076	0.197615	0.008219	0.006386	0	100.042	80.646		units	1.98026	0.000999755	0.0204535	0.000186886	0.0310283	0.158997	0.0103005	0.791847	0.991749	0.0141821		50.2502	40.1215	9.62824
cpx	Bishop Creek	SNB-18-29	18-29-cpx	53.7951	0.029902	0.438746	6.36831	0.270765	14.5938	24.8964	0.100527	0.005275	0.006584	0	100.505	80.3338		units	1.98286	0.00082884	0.0190598	0.000191873	0.0205538	0.175751	0.00845333	0.801911	0.983206	0.00718421		49.6212	40.4715	9.90725
cpx	Bishop Creek	SNB-18-29	18-29-cpx	53.5298	0.039687	0.439839	6.34982	0.22749	14.504	25.1903	0.158843	0	0.008624	0	100.448	80.2822		units	1.97332	0.0011002	0.0191096	0.000251354	0.0431547	0.152603	0.00710313	0.797074	0.994932	0.0113532		50.0528	40.099	9.84815
cpx	Bishop Creek	SNB-18-29	18-29-cpx	53.6833	0.023287	0.398047	6.4659	0.282556	14.482	25.1005	0.133624	0	0.017502	0.020466	100.607	79.9696		units	1.9778	0.000645175	0.0172836	0.000509807	0.0348646	0.164353	0.00881725	0.79539	0.990794	0.00954496		49.904	40.0619	10.0341
cpx	Bishop Creek	SNB-18-29	18-29-cpx	54.0512	0.021491	0.279459	6.42646	0.318882	14.3344	25.218	0.128774	0	0	0.02575	100.804	79.9034		units	1.98939	0.000594829	0.0121224	0	0.0170965	0.180711	0.009941	0.786505	0.99445	0.00918945		50.2562	39.7473	9.99652
cpx	Bishop Creek	SNB-18-29	18-29-cpx	53.1405	0.022731	0.378064	6.44097	0.280659	14.3545	25.065	0.118834	0	0	0.002869	99.8042	79.8897		units	1.97343	0.000634797	0.0165469	0	0.0438798	0.156154	0.00882796	0.794681	0.99729	0.00855625		50.0646	39.8935	10.0418
cpx	Bishop Creek	SNB-18-29	18-29-cpx	53.5839	0.041078	0.432316	6.47114	0.271144	14.3828	25.2423	0.102632	0.004442	0.010295	0.012472	100.554	79.8462		units	1.97619	0.00113926	0.0187911	0.00030019	0.0335926	0.165994	0.00846993	0.790762	0.997424	0.00733878		50.178	39.7813	10.0407
cpx	Bishop Creek	SNB-18-29	18-29-cpx	53.7262	0	0.231456	6.42449	0.324388	14.1913	25.4988	0.102786	0	0	0.021193	100.521	79.7468		units	1.98396	0	0.0100732	0	0.0293756	0.169024	0.010146	0.781226	1.00884	0.00735912		50.7346	39.2879	9.9775
cpx	Bishop Creek	SNB-18-29	18-29-cpx	53.6439	0.02344	0.263374	6.52615	0.27518	14.3651	25.2914	0.100758	0	0.018946	0	100.508	79.6897		units	1.97974	0.000650529	0.0114556	0.000552817	0.0344173	0.167002	0.00860183	0.790324	1.00004	0.00720966		50.2084	39.6791	10.1125
cpx	Bishop Creek	SNB-18-29	18-29-cpx	53.551	0.047312	0.54132	6.5966	0.240872	14.4266	25.1416	0.160643	0	0	0.012964	100.719	79.5849		units	1.97059	0.00130924	0.0234768	0	0.0441882	0.158816	0.00750759	0.791409	0.991242	0.0114614		49.9201	39.8563	10.2235
cpx	Bishop Creek	SNB-18-29	18-29-cpx	52.9085	0.050635	0.941183	6.83372	0.208925	14.9442	23.1063	0.185551	0.056017	0	0.008502	99.2436	79.5839		units	1.97158	0.00141893	0.0413351	0	0.0260681	0.186894	0.00659425	0.830179	0.922522	0.013406		46.9318	42.234	10.8341
cpx	Bishop Creek	SNB-18-29	18-29-cpx10-c	53.0248	0.040219	0.296241	6.56331	0.273315	14.3445	24.7546	0.168522	0.017162	0.00125	0	99.4839	79.5744		units	1.97561	0.00112687	0.0130084	3.6822e-05	0.0456594	0.158844	0.00862523	0.796741	0.988177	0.0121738		49.6716	40.0489	10.2795
cpx	Bishop Creek	SNB-18-29	18-29-cpx	53.571	0	0.159056	6.54953	0.322261	14.1394	25.4592	0.091746	0.003086	0	0	100.295	79.3738		units	1.98333	0	0.00694019	0	0.0329847	0.169798	0.0101055	0.78038	1.00988	0.00658566		50.6701	39.1553	10.1746
cpx	Bishop Creek	SNB-18-29	18-29-cpx	52.4734	0.019263	0.388307	6.63187	0.303699	14.2466	25.1112	0.209135	0.006639	0.00796	0	99.398	79.2927		units	1.95607	0.000539996	0.0170599	0.000234604	0.0845939	0.122153	0.00958904	0.791709	1.00293	0.0151154		50.1118	39.558	10.3302
cpx	Bishop Creek	SNB-18-29	18-29-cpx	52.8114	0.048472	0.294412	6.56505	0.271916	13.9904	24.386	0.194285	0.000239	0.008092	0.001247	98.5715	79.1607		units	1.98759	0.00137186	0.013059	0.000240785	0.0229567	0.183673	0.00866801	0.78494	0.983325	0.014177		49.7913	39.7459	10.4628
cpx	Bishop Creek	SNB-18-29	18-29-cpx18-r	53.3635	0.00799	0.228866	6.6548	0.295924	14.047	25.3036	0.160294	0.005641	0	0	100.068	79.0029		units	1.97977	0.000222914	0.0100071	0	0.0415322	0.16494	0.00929901	0.776898	1.0058	0.0115301		50.5638	39.0564	10.3798
cpx	Bishop Creek	SNB-18-29	18-29-cpx12-c	53.2869	0.050028	0.300215	6.79185	0.260104	14.216	25.1618	0.125292	0.005015	0.002997	0.011813	100.212	78.8628		units	1.97404	0.0013937	0.0131076	8.77805e-05	0.0449373	0.165479	0.00816147	0.785093	0.998701	0.00899924		50.08	39.3686	10.5514
cpx	Bishop Creek	SNB-18-29	18-29-cpx17-c	53.4178	0.013559	0.226589	6.81657	0.304394	14.2577	24.9651	0.111282	0.003781	0	0.006881	100.124	78.851		units	1.98078	0.000378094	0.00990252	0	0.0357753	0.175609	0.00956034	0.78815	0.991841	0.00800061		49.8068	39.5782	10.615
cpx	Bishop Creek	SNB-18-29	18-29-cpx	53.5055	0.036516	0.497177	6.84872	0.271835	14.3176	24.9066	0.180527	0.001969	0.001165	0.005055	100.573	78.8425		units	1.97334	0.00101276	0.0216107	3.39706e-05	0.0425687	0.168667	0.00849168	0.787191	0.98418	0.012909		49.6407	39.7049	10.6544
cpx	Bishop Creek	SNB-18-29	18-29-cpx4-c	53.5637	0.029672	0.333058	6.85161	0.276	14.3066	24.917	0.187998	0	0	0	100.466	78.8226		units	1.97778	0.0008239	0.0144938	0	0.0417568	0.169814	0.00863181	0.787504	0.985737	0.0134588		49.664	39.6765	10.6595
cpx	Bishop Creek	SNB-18-29	18-29-cpx6-r	53.3933	0.02312	0.314793	6.75444	0.319086	14.0887	25.1415	0.211203	0	0	0.004867	100.251	78.8049		units	1.97662	0.000643641	0.0137346	0	0.0469055	0.162207	0.0100053	0.777526	0.997202	0.0151594		50.2662	39.1929	10.5408
cpx	Bishop Creek	SNB-18-29	18-29-cpx	53.6429	0.004543	0.261774	6.76412	0.302853	14.0605	25.2544	0.173349	0.003785	0.015866	0	100.484	78.7475		units	1.98245	0.000126256	0.0114018	0.000463589	0.0354062	0.173647	0.00947998	0.774641	0.999964	0.012421		50.4101	39.0511	10.5388
cpx	Bishop Creek	SNB-18-29	18-29-cpx12-c	53.3375	0.032334	0.28706	6.90796	0.262269	14.2424	25.1301	0.141186	0.008415	0.017117	0.01095	100.377	78.61		units	1.97284	0.000899373	0.0125138	0.000500568	0.049623	0.164058	0.00821661	0.785327	0.995892	0.0101251		49.9219	39.3667	10.7114
cpx	Bishop Creek	SNB-18-29	18-29-cpx1-c	53.7985	0.016444	0.257398	6.87613	0.250554	14.1712	25.1668	0.154117	0.006789	0	0.019665	100.718	78.6035		units	1.98398	0.000456033	0.0111874	0	0.030955	0.181109	0.00782627	0.779083	0.994381	0.0110196		50.0814	39.2381	10.6805
cpx	Bishop Creek	SNB-18-29	18-29-cpx	53.8154	0.017578	0.252499	6.8109	0.343005	14.0249	25.2076	0.156624	0	0	0.003912	100.632	78.5892		units	1.98706	0.000488083	0.010988	0	0.0251362	0.185176	0.0107273	0.77199	0.997226	0.0112127		50.377	38.9987	10.6244
cpx	Bishop Creek	SNB-18-29	18-29-cpx	53.8869	0.00918	0.123724	6.86797	0.372085	14.0514	25.3769	0.098134	0	0.009332	0.008167	100.804	78.4804		units	1.98785	0.000254662	0.0053791	0.000272176	0.0251598	0.186718	0.0116259	0.772732	1.00299	0.00701886		50.4624	38.8776	10.66
cpx	Bishop Creek	SNB-18-29	18-29-cpx	53.5608	0.029242	0.258412	6.88066	0.295447	14.0591	25.1504	0.133628	0.000774	0.013941	0	100.382	78.4585		units	1.9825	0.000813943	0.0112729	0.000407977	0.0312845	0.181702	0.00926257	0.775771	0.997397	0.00958982		50.2175	39.0589	10.7236
cpx	Bishop Creek	SNB-18-29	18-29-cpx1-c	53.4632	0.104526	0.657229	7.09005	0.222771	14.4714	24.0527	0.211041	0	0.023315	0.007896	100.304	78.4403		units	1.97635	0.00290572	0.028634	0.000681428	0.0272991	0.191888	0.00697515	0.797496	0.952644	0.015126		48.3741	40.4959	11.13
cpx	Bishop Creek	SNB-18-29	18-29-cpx	53.1193	0.019528	0.343256	6.98066	0.291533	14.0935	25.0276	0.154357	0.001311	0.014795	0.016289	100.062	78.2552		units	1.97178	0.00054511	0.0150169	0.000434206	0.051011	0.165689	0.00916598	0.779888	0.995363	0.0111091		49.9693	39.152	10.8788
cpx	Bishop Creek	SNB-18-29	18-29-cpx	52.9856	0.128777	0.590319	7.09721	0.244504	14.3144	23.8178	0.194274	0.008209	0	0	99.3811	78.2381		units	1.9779	0.00361497	0.025971	0	0.0250648	0.196494	0.00773068	0.796578	0.952588	0.0140607		48.3369	40.4205	11.2425
cpx	Bishop Creek	SNB-18-29	18-29-cpx24	53.2343	0.066171	0.703297	6.98136	0.26755	14.0723	24.4086	0.33205	0	0.011707	0.035379	100.113	78.2278		units	1.97235	0.00184366	0.0307105	0.000342936	0.0444158	0.1719	0.0083962	0.777257	0.968932	0.023853		49.3722	39.6054	11.0224
cpx	Bishop Creek	SNB-18-29	18-29-cpx17-c	53.3593	0.053719	0.317661	7.03811	0.268708	14.1808	24.921	0.196425	0.003381	0.006308	0	100.345	78.2208		units	1.97418	0.0014946	0.0138515	0.00018452	0.0487044	0.169061	0.0084206	0.782144	0.987868	0.0140903		49.6971	39.3477	10.9552
cpx	Bishop Creek	SNB-18-29	18-29-cpx	53.375	0.106922	0.63177	7.18277	0.247605	14.4449	24.1258	0.283589	0.0001	0.020722	0.005888	100.425	78.1885		units	1.97018	0.00296795	0.0274842	0.00060475	0.0459015	0.175824	0.0077413	0.794863	0.954132	0.0202957		48.4154	40.3336	11.251
cpx	Bishop Creek	SNB-18-29	18-29-cpx26-c	53.191	0.038438	0.306138	7.03919	0.243705	14.1427	25.0027	0.176874	0.004195	0.015769	0.025521	100.186	78.1723		units	1.97185	0.00107156	0.0133754	0.000462184	0.0530421	0.165187	0.00765218	0.781582	0.993069	0.0127129		49.8308	39.2187	10.9505
cpx	Bishop Creek	SNB-18-29	18-29-cpx17-r	53.3279	0.047871	0.435699	7.00723	0.272927	14.0556	24.8897	0.183244	0.001485	0.021808	0.003719	100.247	78.1445		units	1.9758	0.00133378	0.0190253	0.000638823	0.039226	0.17789	0.00856489	0.776331	0.988024	0.0131633		49.8632	39.1795	10.9573
cpx	Bishop Creek	SNB-18-29	18-29-cpx	53.1575	0.021056	0.213372	6.9385	0.316844	13.9121	24.5597	0.127555	0.007234	0.01452	0	99.2684	78.1376		units	1.99077	0.000592999	0.00941782	0.000429931	0.0166848	0.200625	0.0100505	0.776707	0.985459	0.00926193		49.7839	39.238	10.9781
cpx	Bishop Creek	SNB-18-29	18-29-cpx19-c	52.4387	0.117158	1.58732	7.3068	0.269788	14.636	23.3306	0.311837	0.065605	0.007153	0.017813	100.089	78.1206		units	1.93925	0.00325818	0.0691836	0.000209145	0.0679427	0.158035	0.00845067	0.806891	0.924416	0.0223593		47.2295	41.225	11.5455
cpx	Bishop Creek	SNB-18-29	18-29-cpx	53.5044	0.035264	0.401576	7.02357	0.251455	14.0406	24.9211	0.193443	0	0.007696	0.00357	100.383	78.0864		units	1.97974	0.000981229	0.0175122	0.000225143	0.0347029	0.182633	0.00788069	0.774483	0.987967	0.0138777		49.9027	39.1195	10.9778
cpx	Bishop Creek	SNB-18-29	18-29-cpx	52.8825	0.036809	1.14803	6.86045	0.257847	13.7016	24.7777	0.202098	0.004877	0.005252	0.021621	99.8988	78.0703		units	1.96611	0.00102913	0.0503045	0.000154382	0.029827	0.18348	0.00811977	0.75941	0.986996	0.0145682		50.3643	38.7511	10.8846
cpx	Bishop Creek	SNB-18-29	18-29-cpx16-r	53.3528	0.031231	0.325549	7.11295	0.260323	14.142	24.9947	0.220539	0	0.004116	0	100.444	77.993		units	1.97198	0.000868064	0.0141813	0.000120281	0.0558074	0.164055	0.00814974	0.779227	0.989807	0.0158044		49.7666	39.1789	11.0545
cpx	Bishop Creek	SNB-18-29	18-29-cpx14-c	53.2851	0.054157	0.343692	7.09139	0.289786	14.093	24.7434	0.184175	0.008697	0.011439	0.001169	100.106	77.9856		units	1.97732	0.00151128	0.0150313	0.000335609	0.0402256	0.179843	0.00910822	0.779619	0.983757	0.013251		49.5984	39.3063	11.0953
cpx	Bishop Creek	SNB-18-29	18-29-cpx	53.0188	0.073683	0.441108	7.11543	0.289348	14.1191	24.6483	0.21698	0.010714	0.016544	0.012656	99.9627	77.9593		units	1.96949	0.00205831	0.0193119	0.000485892	0.0527352	0.16831	0.00910395	0.78188	0.980998	0.0156275		49.4474	39.4108	11.1418
cpx	Bishop Creek	SNB-18-29	18-29-cpx	53.0109	0.052579	0.706904	7.06857	0.28866	14.0239	24.3353	0.242759	0.012386	0.005332	0.030677	99.7779	77.9566		units	1.97261	0.00147133	0.0310022	0.000156871	0.0381924	0.181778	0.00909806	0.777956	0.970221	0.0175145		49.2962	39.5273	11.1765
cpx	Bishop Creek	SNB-18-29	18-29-cpx	53.5591	0.051322	0.340376	7.12165	0.280727	14.0747	24.9465	0.192565	0.000185	0.002102	0.047444	100.617	77.89		units	1.97859	0.00142576	0.0148196	6.13946e-05	0.0388859	0.181132	0.00878399	0.775119	0.987392	0.0137926		49.8047	39.0975	11.0979
cpx	Bishop Creek	SNB-18-29	18-29-cpx	52.7872	0.142173	1.00186	7.38774	0.25379	14.5325	23.3718	0.318037	0.015571	0.003668	0	99.8143	77.8095		units	1.95883	0.00396741	0.0438159	0.000107615	0.0533548	0.17591	0.00797681	0.803932	0.929219	0.022882		47.3508	40.9664	11.6828
cpx	Bishop Creek	SNB-18-29	18-29-cpx6-c	53.1266	0.067257	0.558833	7.17045	0.256143	14.0946	24.4366	0.289796	0	0.001068	0.010929	100.012	77.7966		units	1.9712	0.00187663	0.0244375	3.13304e-05	0.0502178	0.172278	0.00804985	0.779614	0.971443	0.0208477		49.2231	39.5031	11.2739
cpx	Bishop Creek	SNB-18-29	18-29-cpx11-c	53.3413	0.027409	0.290417	7.15141	0.269436	14.0561	25.167	0.154963	0.001322	0.021865	0	100.481	77.7952		units	1.97288	0.000762343	0.0126594	0.000639383	0.0505378	0.170662	0.00844068	0.775012	0.997298	0.0111125		50.0272	38.8768	11.096
cpx	Bishop Creek	SNB-18-29	18-29-cpx	53.1707	0.103584	0.834811	7.30961	0.23626	14.3583	23.992	0.301954	0.002088	0.022658	0	100.332	77.7848		units	1.96457	0.00287812	0.0363529	0.0006619	0.049718	0.176145	0.00739386	0.790875	0.949773	0.0216313		48.2974	40.2172	11.4855
cpx	Bishop Creek	SNB-18-29	18-29-cpx27-r	53.461	0.066204	0.436326	7.19131	0.261672	14.1157	24.5611	0.242815	0.00511	0.003283	0.01425	100.359	77.7722		units	1.97835	0.00184234	0.0190297	9.60531e-05	0.0379198	0.184631	0.00820178	0.778709	0.973803	0.0174216		49.3049	39.4271	11.268
cpx	Bishop Creek	SNB-18-29	18-29-cpx	52.4545	0.297103	1.37231	7.40224	0.228507	14.5185	23.0983	0.304635	0.007317	0.02633	0.031949	99.7416	77.7589		units	1.94849	0.00829935	0.060079	0.000773291	0.0475012	0.18245	0.00718955	0.803982	0.919292	0.0219403		47.0653	41.1618	11.7729
cpx	Bishop Creek	SNB-18-29	18-29-cpx	53.1868	0.061768	0.402608	7.18738	0.23393	14.0534	24.6807	0.210641	0.002357	0.011882	0	100.031	77.7052		units	1.97486	0.00172471	0.0176185	0.000348816	0.0440365	0.179145	0.00735705	0.777895	0.981855	0.0151643		49.5153	39.2296	11.2551
cpx	Bishop Creek	SNB-18-29	18-29-cpx	53.4161	0.074512	0.499763	7.27323	0.269949	14.2047	24.4194	0.24306	0	0.010245	2e-06	100.411	77.685		units	1.97488	0.00207165	0.0217765	0.000299472	0.0414361	0.183445	0.0084535	0.782908	0.967302	0.0174233		48.9751	39.6391	11.3858
cpx	Bishop Creek	SNB-18-29	18-29-cpx4-r	53.2426	0.023326	0.413699	7.08621	0.266032	13.8136	25.0735	0.217882	0.003507	0	0	100.14	77.6526		units	1.976	0.000651012	0.0180954	0	0.0442787	0.175658	0.00836272	0.764264	0.997011	0.0156782		50.3233	38.5756	11.1011
cpx	Bishop Creek	SNB-18-29	18-29-cpx	53.4557	0.047283	0.314649	7.2169	0.291527	14.0639	24.6855	0.193856	0.002042	0.011411	0.024823	100.308	77.647		units	1.98087	0.00131761	0.0137418	0.00033432	0.0354674	0.188183	0.00915013	0.77692	0.980083	0.013928		49.4828	39.2254	11.2917
cpx	Bishop Creek	SNB-18-29	18-29-cpx26-c	52.9482	0.111274	0.66445	7.32415	0.227617	14.2077	24.1678	0.240797	0.008367	0.002539	0	99.9028	77.5675		units	1.96695	0.00310854	0.0290911	7.45728e-05	0.0480642	0.179475	0.00716197	0.78682	0.961913	0.0173436		48.6731	39.8133	11.5135
cpx	Bishop Creek	SNB-18-29	18-29-cpx	53.4938	0.015062	0.358693	7.13407	0.302941	13.8193	25.0875	0.151453	0.001518	0.030981	0.009973	100.405	77.5427		units	1.98218	0.000419705	0.0156646	0.000907636	0.0290998	0.191972	0.0095079	0.763371	0.995991	0.0108809		50.2916	38.5456	11.1628
cpx	Bishop Creek	SNB-18-29	18-29-cpx	53.292	0.037782	0.437232	7.21291	0.2761	13.9611	24.7202	0.211385	0.000704	0.007616	0	100.157	77.5291		units	1.97715	0.0010541	0.0191181	0.000223398	0.0394548	0.184337	0.00867621	0.772157	0.982623	0.0152054		49.6633	39.026	11.3108
cpx	Bishop Creek	SNB-18-29	18-29-cpx19-c	52.5372	0.067637	0.464761	7.57625	0.243382	14.6555	24.451	0.104368	0.004734	0.033032	0.014568	100.152	77.5185		units	1.9467	0.00188468	0.0202963	0.000967703	0.0890686	0.145701	0.00763847	0.809545	0.970702	0.00749801		48.1734	40.1756	11.651
cpx	Bishop Creek	SNB-18-29	18-29-cpx	53.382	0.057725	0.471663	7.27475	0.287192	14.0627	24.5443	0.214008	0.003276	0.009147	0.013093	100.32	77.5068		units	1.97726	0.00160788	0.02059	0.00026787	0.0367744	0.188568	0.00901006	0.776512	0.97404	0.015369		49.2962	39.2993	11.4046
cpx	Bishop Creek	SNB-18-29	18-29-cpx	52.972	0.019369	1.30457	6.87335	0.273267	13.2857	24.0044	0.182805	0.099956	0.010733	0.003717	99.0299	77.5053		units	1.9916	0.000547624	0.0578067	0.000319044	0	0.216112	0.00870217	0.744644	0.966948	0.0133257		50.1606	38.6285	11.2109
cpx	Bishop Creek	SNB-18-29	18-29-cpx17-c	53.0149	0.063595	0.872712	7.15229	0.255926	13.8138	24.1518	0.213897	0.02908	0	0.039007	99.607	77.4914		units	1.97865	0.0017849	0.0383882	0	0.016223	0.207017	0.00809042	0.768588	0.965782	0.0154783		49.3348	39.2615	11.4037
cpx	Bishop Creek	SNB-18-29	18-29-cpx16-c	53.0234	0.050039	0.511249	7.24002	0.277128	13.9746	24.5931	0.22658	0.002786	0.004726	0.011693	99.9153	77.4806		units	1.97153	0.00139915	0.0224039	0.000138933	0.0479381	0.177191	0.00872773	0.774611	0.979729	0.0163344		49.4945	39.1323	11.3732
cpx	Bishop Creek	SNB-18-29	18-29-cpx	53.3749	0.050626	0.56149	7.26304	0.29484	14.0093	24.2825	0.227396	0.014169	0.004464	0.021836	100.105	77.4684		units	1.98154	0.00141339	0.0245677	0.000131029	0.0257562	0.199741	0.00927126	0.77534	0.965869	0.016368		49.111	39.4233	11.4657
cpx	Bishop Creek	SNB-18-29	18-29-cpx	53.2706	0.02042	0.343779	7.32095	0.270856	14.1113	24.6068	0.146502	0.001579	0.013576	0.008055	100.114	77.4565		units	1.97777	0.000570119	0.0150426	0.000398508	0.038416	0.188891	0.00851753	0.781027	0.978817	0.0105458		49.2573	39.3039	11.4388
cpx	Bishop Creek	SNB-18-29	18-29-cpx13-c	53.2148	0.059789	0.360863	7.29578	0.272689	14.0505	24.7207	0.199907	0	0.008971	0	100.184	77.4412		units	1.97377	0.00166765	0.0157747	0.000263075	0.0474706	0.178833	0.00856675	0.776897	0.982386	0.014376		49.4759	39.1268	11.3973
cpx	Bishop Creek	SNB-18-29	18-29-cpx18-c	53.1563	0.027802	0.42601	7.1868	0.258121	13.8306	24.9008	0.212446	0	0.012068	0.016653	100.028	77.4285		units	1.97558	0.000777027	0.0186601	0.000354609	0.0435823	0.179791	0.00812547	0.766281	0.991541	0.0153086		50.0476	38.6777	11.2747
cpx	Bishop Creek	SNB-18-29	18-29-cpx1-r	53.7006	0.038731	0.362388	7.37927	0.271238	14.1862	24.317	0.188674	0.002544	0.004186	0	100.451	77.4103		units	1.98654	0.00107745	0.0157997	0.000122432	0.0223748	0.205916	0.00849875	0.782338	0.9638	0.0135325		48.8141	39.6235	11.5624
cpx	Bishop Creek	SNB-18-29	18-29-cpx	52.6171	0.013539	0.252123	7.26763	0.312758	13.9624	24.7308	0.153344	0.006104	0.018181	0	99.334	77.3988		units	1.96901	0.000381003	0.0111196	0.000537915	0.0606862	0.166755	0.00991323	0.778916	0.991555	0.0111259		49.6295	38.9865	11.384
cpx	Bishop Creek	SNB-18-29	18-29-cpx	53.1532	0.065596	0.496433	7.41731	0.253279	14.2221	24.318	0.278143	0	0.011031	0.000944	100.216	77.3645		units	1.96846	0.00182682	0.0216678	0.000322989	0.0574007	0.17232	0.0079448	0.78518	0.964902	0.0199716		48.7373	39.6595	11.6032
cpx	Bishop Creek	SNB-18-29	18-29-cpx9-c	53.1598	0.058392	0.499967	7.33258	0.263132	14.0554	24.4974	0.262759	0	0	0	100.129	77.3593		units	1.97148	0.00162848	0.0218528	0	0.0508215	0.176595	0.00826549	0.777072	0.97339	0.0188935		49.2138	39.2882	11.498
cpx	Bishop Creek	SNB-18-29	18-29-cpx	53.1595	0.077642	0.49107	7.30316	0.269621	13.9847	24.4647	0.266745	0	0.01061	0	100.028	77.3414		units	1.97403	0.00216815	0.0214917	0.000311503	0.0450143	0.181784	0.00848031	0.774167	0.973353	0.019205		49.3007	39.2119	11.4874
cpx	Bishop Creek	SNB-18-29	18-29-cpx	52.6206	0.062195	0.401116	7.14071	0.284787	13.6594	24.7471	0.222147	0.023797	0	0.020984	99.1829	77.3231		units	1.97338	0.001754	0.0177288	0	0.0481619	0.175788	0.00904607	0.763648	0.994343	0.0161526		50.1702	38.5303	11.2995
cpx	Bishop Creek	SNB-18-29	18-29-cpx22	53.3293	0.009747	0.343129	7.28626	0.267211	13.9235	24.9186	0.17042	0.002315	0.033277	0.020075	100.304	77.3051		units	1.9775	0.000271795	0.0149956	0.000975595	0.0407413	0.185208	0.00839248	0.769675	0.98999	0.0122523		49.8581	38.7625	11.3793
cpx	Bishop Creek	SNB-18-29	18-29-cpx	52.6695	0.177505	1.15796	7.53902	0.260123	14.3912	23.4365	0.334499	1.3e-05	0	0.020247	99.9866	77.2864		units	1.95243	0.00494821	0.0505901	0	0.0586917	0.175024	0.00816735	0.795283	0.930823	0.0240413		47.4953	40.5793	11.9253
cpx	Bishop Creek	SNB-18-29	18-29-cpx26-r	53.1627	0.067408	0.368805	7.26545	0.27579	13.8538	24.8514	0.217124	0	0	0	100.062	77.2672		units	1.97525	0.00188342	0.0161498	0	0.0452194	0.180534	0.00867921	0.76735	0.989291	0.0156412		49.9039	38.7082	11.3879
cpx	Bishop Creek	SNB-18-29	18-29-cpx	52.4654	0.069195	0.532135	7.45528	0.282304	14.2152	24.1325	0.260907	0.001426	0.020371	0.033178	99.4679	77.2665		units	1.95789	0.00194182	0.0234041	0.000601038	0.0752155	0.157451	0.00892313	0.790817	0.964881	0.0188776		48.5264	39.7722	11.7014
cpx	Bishop Creek	SNB-18-29	18-29-cpx	53.0441	0.062239	0.43683	7.29781	0.275256	13.8978	24.6982	0.196672	0	0.023538	0.012293	99.9447	77.2449		units	1.97333	0.00174119	0.0191527	0.00069232	0.0442081	0.182836	0.0086733	0.770757	0.984428	0.0141857		49.6627	38.8834	11.454
cpx	Bishop Creek	SNB-18-29	18-29-cpx	53.6165	0.01899	0.358966	7.33638	0.293187	13.9462	24.8424	0.188003	0	0.018376	0	100.619	77.2132		units	1.98169	0.000527818	0.0156368	0.000536988	0.0328553	0.19391	0.00917844	0.768427	0.983762	0.0134726		49.7112	38.83	11.4588
cpx	Bishop Creek	SNB-18-29	18-29-cpx3-c	53.5011	0.027647	0.262796	7.42419	0.26492	14.1108	24.7224	0.195191	0.002139	0.001528	0.030706	100.543	77.2104		units	1.97844	0.000768827	0.0114534	4.46744e-05	0.0440825	0.185514	0.00829775	0.777895	0.979511	0.0139948		49.2959	39.1492	11.5549
cpx	Bishop Creek	SNB-18-29	18-29-cpx2-c	53.4646	0.083819	0.616267	7.38772	0.290656	14.0364	24.2863	0.238788	0.00026	0.008365	0.011837	100.425	77.204		units	1.97845	0.00233251	0.0268772	0.000244738	0.0284362	0.20019	0.00911013	0.774327	0.962895	0.0171324		48.9812	39.3889	11.6299
cpx	Bishop Creek	SNB-18-29	18-29-cpx27-c	53.2641	0.059704	0.4913	7.34937	0.236933	13.9592	24.5763	0.261982	0	0.005605	0.030235	100.235	77.1986		units	1.97478	0.0016646	0.0214678	0.000164299	0.0443085	0.183563	0.00744039	0.771534	0.976244	0.0188323		49.4138	39.0521	11.534
cpx	Bishop Creek	SNB-18-29	18-29-cpx10-c	52.9271	0.071867	0.487521	7.42175	0.299937	14.0912	24.1396	0.243744	7.4e-05	0	0.015825	99.6987	77.1917		units	1.97196	0.00201359	0.0214077	0	0.048249	0.183001	0.00946534	0.782669	0.963624	0.0176076		48.7283	39.5778	11.6938
cpx	Bishop Creek	SNB-18-29	18-29-cpx8-c	53.4986	0.055995	0.38351	7.43395	0.256099	14.097	24.6164	0.192252	0.003089	0.011237	0.014358	100.563	77.17		units	1.97781	0.00155672	0.0167099	0.000328448	0.038015	0.191821	0.00801927	0.77692	0.975043	0.0137803		49.1999	39.2028	11.5973
cpx	Bishop Creek	SNB-18-29	18-29-cpx	52.3297	0.158587	2.46003	8.20136	0.195619	15.5483	19.223	0.32543	0.132412	0	0.000872	98.5753	77.1655		units	1.96031	0.00446751	0.108611	0	0	0.256933	0.00620689	0.868298	0.771535	0.0236364		40.6764	45.7778	13.5458
cpx	Bishop Creek	SNB-18-29	18-29-cpx4-c	52.9661	0.099668	0.583211	7.55462	0.268063	14.3196	23.8927	0.266849	0.005558	0.013319	0.01812	99.9878	77.1623		units	1.96631	0.00278247	0.0255173	0.000390931	0.0551198	0.179423	0.008429	0.792489	0.950334	0.0192073		48.0606	40.078	11.8614
cpx	Bishop Creek	SNB-18-29	18-29-cpx27-c	53.647	0.005593	0.335708	7.30407	0.280054	13.8329	24.8494	0.236517	0.003255	0.016813	0.049111	100.56	77.1473		units	1.98491	0.000155618	0.014639	0.000491831	0.0317078	0.194296	0.00877652	0.762985	0.985072	0.016967		49.9008	38.6505	11.4487
cpx	Bishop Creek	SNB-18-29	18-29-cpx18-c	52.9737	0.058827	0.537913	7.43365	0.27196	14.0774	24.1494	0.256303	0	0.017683	0.00794	99.7848	77.1462		units	1.97166	0.00164653	0.0235961	0.000520361	0.0477578	0.183625	0.00857361	0.781096	0.963024	0.0184958		48.7483	39.5391	11.7126
cpx	Bishop Creek	SNB-18-29	18-29-cpx26-r	53.1101	0.058057	0.475578	7.35063	0.265212	13.9186	24.4468	0.231501	0.004331	0	0	99.8608	77.1442		units	1.97661	0.00162487	0.0208604	0	0.0393719	0.189412	0.00836033	0.772236	0.974819	0.0167049		49.337	39.084	11.5791
cpx	Bishop Creek	SNB-18-29	18-29-cpx	53.4138	0.042449	0.58862	7.58768	0.256424	14.3426	23.3911	0.219651	0.009115	0.0058	0.021814	99.8791	77.1137		units	1.98609	0.00118696	0.0257951	0.00017051	0.0153084	0.220637	0.00807589	0.79503	0.931867	0.0158353		47.4754	40.504	12.0206
cpx	Bishop Creek	SNB-18-29	18-29-cpx	53.3054	0.071181	0.570613	7.4285	0.244707	14.0369	24.2447	0.273015	0	0.0048	0	100.18	77.1076		units	1.97636	0.00198463	0.024934	0.000140706	0.0378606	0.19247	0.0076847	0.775844	0.963095	0.0196258		48.9062	39.3975	11.6963
cpx	Bishop Creek	SNB-18-29	18-29-cpx	53.0875	0.091574	0.575859	7.47936	0.266854	14.1143	24.0823	0.270644	0.001255	0.006866	0.006611	99.9831	77.0842		units	1.97188	0.00255788	0.0252092	0.000201635	0.0452133	0.187118	0.0083955	0.781548	0.95839	0.0194909		48.5933	39.6268	11.7799
cpx	Bishop Creek	SNB-18-29	18-29-cpx26-r	53.3111	0.063043	0.481574	7.38371	0.255351	13.9212	24.5045	0.23024	0	0.00815	0.014608	100.173	77.0682		units	1.97856	0.0017595	0.0210644	0.000239146	0.0346342	0.194538	0.00802701	0.770222	0.974393	0.0165675		49.3667	39.0226	11.6108
cpx	Bishop Creek	SNB-18-29	18-29-cpx	52.4129	0.13129	0.82204	7.45744	0.258053	14.0536	23.7054	0.292262	0.005482	0.021705	0	99.1602	77.0599		units	1.96178	0.00369542	0.0362626	0.000642312	0.0533615	0.180068	0.00818098	0.784165	0.950638	0.0212095		48.2991	39.8411	11.8599
cpx	Bishop Creek	SNB-18-29	18-29-cpx26-r	53.238	0.075468	0.477738	7.45464	0.254629	14.0425	24.3004	0.238365	0	0	0.003091	100.085	77.0526		units	1.97654	0.00210702	0.020904	0	0.038957	0.192498	0.00800715	0.77721	0.966617	0.0171583		48.9356	39.3468	11.7176
cpx	Bishop Creek	SNB-18-29	18-29-cpx6-r	53.2062	0.082532	0.601588	7.43312	0.256981	13.9847	24.2925	0.279256	0.001936	0.016868	0	100.156	77.0307		units	1.9735	0.00230207	0.0262985	0.000494669	0.0416803	0.18889	0.0080735	0.77328	0.965396	0.0200828		49.0236	39.2678	11.7085
cpx	Bishop Creek	SNB-18-29	18-29-cpx	53.2632	0.111861	0.647727	7.63956	0.23902	14.3716	23.8007	0.270798	0.00315	0.009334	0	100.357	77.0288		units	1.9698	0.00311096	0.0282321	0.000272922	0.045088	0.191188	0.00748713	0.792333	0.943069	0.0194173		47.8308	40.1857	11.9835
cpx	Bishop Creek	SNB-18-29	18-29-cpx2-r	53.6211	0.079444	0.61611	7.54928	0.266292	14.1871	23.9659	0.245612	0	0	0	100.531	77.0106		units	1.9814	0.00220759	0.0268318	0	0.0235568	0.209734	0.0083345	0.781515	0.948827	0.0175967		48.32	39.7994	11.8806
cpx	Bishop Creek	SNB-18-29	18-29-cpx	52.9989	0.114323	0.683416	7.5356	0.219675	14.1435	24.085	0.293078	0	0.008723	0.017005	100.099	76.9882		units	1.96578	0.00318876	0.0298751	0.000255805	0.0530079	0.180737	0.00690136	0.782046	0.957131	0.0210765		48.5134	39.639	11.8476
cpx	Bishop Creek	SNB-18-29	18-29-cpx	53.0765	0.061627	0.438978	7.43829	0.2679	13.9539	24.5125	0.215924	0.000904	0.004753	0	99.9713	76.9794		units	1.97356	0.00172322	0.0192374	0.000139731	0.0456238	0.185677	0.00843736	0.773486	0.976549	0.0155667		49.2874	39.0386	11.674
cpx	Bishop Creek	SNB-18-29	18-29-cpx	52.9486	0.122801	0.709934	7.66598	0.205734	14.3799	23.5772	0.283596	0.001349	0.018313	0.023016	99.9365	76.978		units	1.96606	0.00342898	0.0310682	0.000537622	0.049832	0.188217	0.00647044	0.79599	0.937979	0.0204169		47.5644	40.3642	12.0713
cpx	Bishop Creek	SNB-18-29	18-29-cpx	52.9522	0.054782	0.500139	7.47997	0.248167	14.0308	24.2878	0.258746	0	0.001016	0.006699	99.8203	76.9778		units	1.9705	0.00153303	0.0219351	2.98925e-05	0.052636	0.180145	0.00782208	0.778366	0.968363	0.0186687		48.9193	39.3211	11.7595
cpx	Bishop Creek	SNB-18-29	18-29-cpx20-c	53.2404	0.085074	0.535554	7.53304	0.261171	14.1224	24.2347	0.252192	0.003024	0.008858	0	100.276	76.9678		units	1.9724	0.00237012	0.0233836	0.000259456	0.0449413	0.188447	0.00819527	0.779956	0.961938	0.0181147		48.6988	39.4858	11.8154
cpx	Bishop Creek	SNB-18-29	18-29-cpx17-r	53.152	0.059428	0.584944	7.57036	0.262314	14.1879	24.0173	0.272898	0.000167	0.018496	6.7e-05	100.126	76.9622		units	1.97103	0.00165724	0.0255649	0.000542285	0.0481328	0.18664	0.00823914	0.784334	0.954235	0.019621		48.3563	39.7465	11.8972
cpx	Bishop Creek	SNB-18-29	18-29-cpx	53.1363	0.091835	0.611092	7.56429	0.265434	14.1756	24.0532	0.281936	0	0.012659	0.01359	100.206	76.961		units	1.96917	0.0025593	0.0266904	0.000370909	0.0497341	0.184698	0.00833172	0.783143	0.955043	0.0202577		48.415	39.7007	11.8843
cpx	Bishop Creek	SNB-18-29	18-29-cpx	53.0988	0.08122	0.559792	7.50549	0.289049	14.0556	24.3287	0.256931	0.003611	0.01562	0	100.195	76.9487		units	1.96897	0.00226484	0.0244645	0.000457941	0.0510885	0.181661	0.00907843	0.776982	0.966565	0.0184721		48.9079	39.3151	11.777
cpx	Bishop Creek	SNB-18-29	18-29-cpx8-c	53.3222	0.041681	0.500656	7.40384	0.254367	13.8568	24.483	0.308752	0	0	0.028715	100.2	76.9379		units	1.97786	0.00116264	0.0218868	0	0.0422704	0.187397	0.0079916	0.766232	0.972994	0.0222047		49.4183	38.9169	11.6648
cpx	Bishop Creek	SNB-18-29	18-29-cpx	53.0388	0.073037	0.58767	7.54196	0.269686	14.1127	24.1589	0.298769	0	0.009694	0.002099	100.093	76.9347		units	1.96746	0.0020374	0.0256922	0.000284309	0.0565112	0.177455	0.00847338	0.780427	0.960169	0.0214879		48.627	39.524	11.849
cpx	Bishop Creek	SNB-18-29	18-29-cpx	53.02	0.063859	0.58719	7.45729	0.266041	13.9533	24.0271	0.241795	0.010831	0.002546	0.013445	99.6435	76.9334		units	1.97768	0.00179126	0.0258137	7.50845e-05	0.0326531	0.19997	0.00840525	0.775894	0.96023	0.0174868		48.7736	39.4105	11.8158
cpx	Bishop Creek	SNB-18-29	18-29-cpx27-c	53.1589	0.065949	0.622703	7.48381	0.233521	13.9981	24.218	0.268156	0.001205	0.009276	0.018123	100.078	76.9273		units	1.97357	0.00184122	0.0272467	0.000272278	0.0409538	0.191403	0.00734326	0.77474	0.963324	0.0193024		48.8892	39.3185	11.7922
cpx	Bishop Creek	SNB-18-29	18-29-cpx	53.0687	0.080856	0.610806	7.57892	0.231639	14.1729	23.853	0.27125	0	0.003888	0.027471	99.8994	76.9234		units	1.97286	0.00226043	0.0267619	0.000114277	0.0424362	0.193188	0.00729382	0.785462	0.950073	0.0195512		48.1987	39.8477	11.9536
cpx	Bishop Creek	SNB-18-29	18-29-cpx	53.14	0.05293	0.45707	7.41276	0.284855	13.8593	24.7095	0.193275	0.005345	0.021747	0.016078	100.153	76.9197		units	1.97389	0.00147851	0.0200097	0.000638669	0.0425336	0.187736	0.00896212	0.767449	0.983382	0.0139195		49.6382	38.7385	11.6233
cpx	Bishop Creek	SNB-18-29	18-29-cpx7-c	52.9864	0.067029	0.480026	7.46915	0.2745	13.9611	24.2768	0.235179	0.000428	0.005577	0	99.7562	76.9152		units	1.97406	0.00187794	0.0210774	0.000164276	0.0438609	0.188854	0.00866214	0.775402	0.969049	0.016988		49.012	39.2179	11.7701
cpx	Bishop Creek	SNB-18-29	18-29-cpx27-c	53.1739	0.075976	0.600873	7.55495	0.268746	14.1132	24.0598	0.289344	0	0.009468	0	100.146	76.9048		units	1.97176	0.00211862	0.0262599	0.000277581	0.0465092	0.187775	0.00844079	0.780173	0.955884	0.0208026		48.5136	39.5958	11.8905
cpx	Bishop Creek	SNB-18-29	18-29-cpx8-r	53.1834	0.080465	0.612384	7.54287	0.279681	14.0698	24.0326	0.278431	0	0.014129	0	100.094	76.8783		units	1.97368	0.00224558	0.0267843	0.00041456	0.0409789	0.193117	0.00879123	0.778388	0.955564	0.0200339		48.5539	39.5513	11.8948
cpx	Bishop Creek	SNB-18-29	18-29-cpx2-c	53.425	0.086722	0.658889	7.60858	0.272814	14.1923	23.8689	0.283703	0.005304	0	0.011985	100.414	76.8783		units	1.97611	0.00241222	0.0287233	0	0.0345781	0.200779	0.00854711	0.782579	0.945926	0.0203459		48.1666	39.849	11.9844
cpx	Bishop Creek	SNB-18-29	18-29-cpx7-r	52.8877	0.085363	0.60163	7.55638	0.26302	14.0914	24.0451	0.280544	0	0.007057	0.049693	99.8678	76.8738		units	1.96752	0.00238811	0.0263785	0.000207568	0.0538393	0.181251	0.00828779	0.781494	0.958402	0.0202354		48.527	39.5696	11.9034
cpx	Bishop Creek	SNB-18-29	18-29-cpx	53.2781	0.058031	0.553782	7.50929	0.279026	14.0015	24.4741	0.216338	0.001256	0.004396	0	100.376	76.8712		units	1.97311	0.00161616	0.0241711	0.000128717	0.0417791	0.190793	0.00875252	0.773009	0.971105	0.015534		49.1279	39.1063	11.7658
cpx	Bishop Creek	SNB-18-29	18-29-cpx3-c	53.2085	0.107027	0.590502	7.70785	0.250485	14.3706	23.7875	0.265423	0	0.001775	0	100.29	76.8698		units	1.96944	0.00297903	0.0257595	5.19439e-05	0.0484049	0.190184	0.00785287	0.792946	0.943337	0.0190479		47.767	40.1518	12.0812
cpx	Bishop Creek	SNB-18-29	18-29-cpx5	53.1179	0.084364	0.587892	7.59167	0.25338	14.1536	23.9134	0.287605	0.000638	0.034168	0	100.025	76.8693		units	1.97202	0.00235531	0.0257231	0.00100292	0.0452267	0.190476	0.00796761	0.783333	0.951195	0.0207021		48.2784	39.7584	11.9632
cpx	Bishop Creek	SNB-18-29	18-29-cpx13-c	52.7136	0.067598	0.561446	7.59031	0.26491	14.15	24.0214	0.265174	0.004226	0.013431	0.001286	99.6534	76.868		units	1.9641	0.00189407	0.024655	0.000395662	0.0621167	0.174397	0.00836036	0.78597	0.958954	0.0191566		48.3969	39.6666	11.9365
cpx	Bishop Creek	SNB-18-29	18-29-cpx	53.1356	0.067813	0.513962	7.45036	0.270739	13.8862	24.573	0.23962	0.001404	0.021303	0	100.16	76.8642		units	1.97232	0.00189289	0.0224843	0.000625184	0.0457074	0.185565	0.00851194	0.768391	0.977256	0.0172449		49.4333	38.8681	11.6986
cpx	Bishop Creek	SNB-18-29	18-29-cpx	52.7565	0.19919	1.19668	7.78559	0.283147	14.5034	22.9984	0.319508	0.005185	0.011643	0.047926	100.107	76.855		units	1.9547	0.00555	0.0522563	0.000341071	0.0498495	0.191392	0.00888591	0.801095	0.912975	0.0229527		46.6921	40.9702	12.3377
cpx	Bishop Creek	SNB-18-29	18-29-cpx	53.5555	0.02922	0.354791	7.40528	0.28611	13.7908	24.7637	0.184368	0	0.012521	0.031751	100.414	76.8496		units	1.98557	0.000814672	0.0155028	0.000367025	0.0246098	0.204994	0.00898463	0.76222	0.983682	0.013253		49.7939	38.5836	11.6225
cpx	Bishop Creek	SNB-18-29	18-29-cpx	52.8341	0.074463	0.581739	7.50602	0.288004	13.9777	24.2264	0.291442	0.010957	0.005332	0	99.7962	76.8487		units	1.96665	0.00208436	0.0255209	0.00015692	0.0578881	0.175768	0.00908023	0.775634	0.966184	0.0210335		48.9089	39.2632	11.8279
cpx	Bishop Creek	SNB-18-29	18-29-cpx18-r	52.8617	0.076206	0.616232	7.54199	0.271433	14.0292	24.0344	0.272424	0.000474	0.030575	0	99.7345	76.829		units	1.96878	0.00213435	0.0270493	0.000900324	0.0498871	0.185021	0.00856259	0.778927	0.959062	0.019672		48.6119	39.4814	11.9068
cpx	Bishop Creek	SNB-18-29	18-29-cpx	52.9139	0.052051	0.506796	7.48484	0.283449	13.9131	24.7057	0.221039	0.003249	0.018202	0.008851	100.111	76.8166		units	1.96516	0.00145371	0.0221828	0.000534469	0.0599759	0.172494	0.00891638	0.770303	0.983066	0.0159164		49.5038	38.7898	11.7064
cpx	Bishop Creek	SNB-18-29	18-29-cpx22	53.2043	0.040925	0.332714	7.51117	0.288327	13.9618	24.9134	0.178434	0.00227	0.004007	0.02601	100.463	76.8162		units	1.97038	0.00113976	0.0145221	0.000117327	0.0551367	0.177494	0.00904428	0.770818	0.988537	0.0128123		49.6257	38.696	11.6783
cpx	Bishop Creek	SNB-18-29	18-29-cpx3-r	53.0237	0.084946	0.620847	7.6326	0.284014	14.1866	24.1075	0.296846	0	0.000561	0.010557	100.248	76.815		units	1.9639	0.00236599	0.0271012	1.64281e-05	0.0616711	0.174745	0.00890993	0.783312	0.956664	0.021317		48.4046	39.6334	11.962
cpx	Bishop Creek	SNB-18-29	18-29-cpx	53.0846	0.018295	0.349874	7.41075	0.292664	13.7578	24.7562	0.201707	0.003572	0.009174	0	99.8847	76.7938		units	1.9773	0.000512456	0.0153593	0.00027017	0.0433194	0.187526	0.00923333	0.763944	0.987971	0.014567		49.8281	38.5293	11.6426
cpx	Bishop Creek	SNB-18-29	18-29-cpx	53.1033	0.094024	0.600979	7.54651	0.26178	14.0096	24.0782	0.282341	0.000684	0	0	99.9774	76.7934		units	1.97327	0.00262739	0.0263197	0	0.0422255	0.192288	0.00823925	0.776065	0.958623	0.0203416		48.6808	39.4101	11.9091
cpx	Bishop Creek	SNB-18-29	18-29-cpx	53.346	0.028236	0.274139	7.48955	0.307476	13.8786	24.7787	0.182542	0	0.001659	0.019908	100.307	76.7611		units	1.97931	0.000787835	0.0119878	4.86668e-05	0.0409039	0.191489	0.00966292	0.767653	0.985027	0.0131317		49.6217	38.6713	11.707
cpx	Bishop Creek	SNB-18-29	18-29-cpx2-c	53.3732	0.1036	0.684982	7.6528	0.253208	14.1773	23.8642	0.303156	0.002328	0.014757	0.021371	100.451	76.7563		units	1.97357	0.00288078	0.0298514	0.000431424	0.0385436	0.198107	0.00793037	0.781508	0.94544	0.0217342		48.1483	39.7998	12.0519
cpx	Bishop Creek	SNB-18-29	18-29-cpx	52.6172	0.176285	1.10633	7.84883	0.233532	14.536	22.4654	0.24699	0.046133	0.00966	0.008548	99.2949	76.7508		units	1.96624	0.00495387	0.0487245	0.000285405	0.0264987	0.218785	0.00739164	0.809769	0.899457	0.0178951		46.0196	41.4308	12.5496
cpx	Bishop Creek	SNB-18-29	18-29-cpx15-c	53.0637	0.08395	0.626255	7.60217	0.274317	14.0761	24.0163	0.259744	0.001353	0.02055	0.011509	100.036	76.7468		units	1.97098	0.0023449	0.0274152	0.000603491	0.0440464	0.192098	0.00863023	0.779423	0.955758	0.0187058		48.483	39.538	11.979
cpx	Bishop Creek	SNB-18-29	18-29-cpx	52.7335	0.147801	0.80063	7.72199	0.260763	14.2971	23.6423	0.301994	0	0.026225	0	99.9322	76.7458		units	1.95822	0.00412736	0.0350398	0.000769955	0.0612481	0.178557	0.00820174	0.791461	0.940636	0.021743		47.702	40.1369	12.1611
cpx	Bishop Creek	SNB-18-29	18-29-cpx	54.0958	0.023576	0.396758	7.37905	0.265248	13.6591	24.8931	0.199324	0.003816	0.014951	0	100.931	76.7418		units	1.996	0.000654166	0.0172535	0.000436157	0.00325946	0.224436	0.00828962	0.751325	0.984086	0.0142595		50.129	38.2723	11.5987
cpx	Bishop Creek	SNB-18-29	18-29-cpx6-c	53.0853	0.073089	0.524675	7.60279	0.27576	14.072	24.2538	0.246361	0	0	0	100.134	76.7402		units	1.96992	0.00203961	0.0229467	0	0.0508608	0.18508	0.00866744	0.778463	0.964298	0.0177253		48.7339	39.3421	11.924
cpx	Bishop Creek	SNB-18-29	18-29-cpx	52.9915	0.073316	0.62283	7.66223	0.256672	14.1713	23.8475	0.302249	0.000719	0.012687	0.019734	99.9607	76.7267		units	1.96851	0.0020481	0.0272682	0.000372619	0.0530172	0.185018	0.00807598	0.784782	0.949141	0.0217692		48.1319	39.7971	12.071
cpx	Bishop Creek	SNB-18-29	18-29-cpx	52.22	0.320163	1.70532	7.86255	0.248595	14.5409	22.6427	0.397043	0.001608	0.013023	0	99.9518	76.7256		units	1.93455	0.0089194	0.0744571	0.000381444	0.0667372	0.176855	0.00780049	0.803049	0.898729	0.0285186		46.1984	41.28	12.5216
cpx	Bishop Creek	SNB-18-29	18-29-cpx	53.2676	0.033083	0.487144	7.44796	0.278653	13.7626	24.7454	0.249078	0	0.031806	0.021044	100.324	76.7106		units	1.97528	0.000922551	0.0212901	0.000932501	0.0432859	0.187685	0.00875214	0.760804	0.983142	0.017908		49.7814	38.5233	11.6952
cpx	Bishop Creek	SNB-18-29	18-29-cpx23	53.1208	0.115427	0.681918	7.71611	0.250942	14.2504	23.6408	0.278941	4.1e-05	0.01002	0.027365	100.093	76.701		units	1.97111	0.00322089	0.0298219	0.000293961	0.0412818	0.198161	0.0078869	0.788282	0.939869	0.0200681		47.7674	40.0633	12.1693
cpx	Bishop Creek	SNB-18-29	18-29-cpx	52.8772	0.054007	0.671167	7.72481	0.267286	14.2609	23.1981	0.215494	0.050461	0	0	99.3194	76.694		units	1.97806	0.00151929	0.0295908	0	0.0268861	0.214779	0.00846901	0.795289	0.92978	0.0156298		47.2753	40.4371	12.2876
cpx	Bishop Creek	SNB-18-29	18-29-cpx	53.2901	0.069811	0.58085	7.53762	0.242654	13.9152	24.3959	0.281287	0.005342	0	0.001896	100.321	76.6939		units	1.97436	0.00194502	0.025363	0	0.0422262	0.191319	0.00761472	0.768562	0.968401	0.0202058		49.1448	39.0032	11.852
cpx	Bishop Creek	SNB-18-29	18-29-cpx	53.0385	0.080301	0.64536	7.63975	0.236951	14.0815	23.9917	0.285423	0	0.016111	0.036798	100.052	76.6656		units	1.96963	0.00224251	0.0282456	0.000473033	0.0480856	0.189176	0.00745311	0.779562	0.95458	0.0205508		48.4213	39.5435	12.0352
cpx	Bishop Creek	SNB-18-29	18-29-cpx	53.1929	0.093751	0.808382	7.61801	0.274765	14.0405	23.6432	0.258693	0.012573	0	0	99.9427	76.6644		units	1.97773	0.00262125	0.0354229	0	0.0225327	0.214337	0.00865286	0.778221	0.941839	0.0186485		48.1284	39.7674	12.1042
cpx	Bishop Creek	SNB-18-29	18-29-cpx23	53.0079	0.073006	0.657662	7.61469	0.219552	14.0282	24.0317	0.284681	0	0.011187	0.010218	99.9389	76.6566		units	1.97031	0.00204067	0.0288106	0.000328762	0.0466804	0.190021	0.0069122	0.777329	0.957054	0.0205163		48.5547	39.4366	12.0087
cpx	Bishop Creek	SNB-18-29	18-29-cpx10-c	52.6732	0.069555	0.57266	7.65233	0.26361	14.0963	23.9321	0.259442	0.003778	0	0.004963	99.528	76.655		units	1.96575	0.00195204	0.0251879	0	0.0581716	0.180658	0.00833272	0.784247	0.956924	0.0187727		48.3295	39.6084	12.0621
cpx	Bishop Creek	SNB-18-29	18-29-cpx8-r	53.2651	0.09479	0.623957	7.68561	0.243836	14.1419	24.0477	0.284831	0.002711	0.002003	0.009651	100.402	76.6351		units	1.97083	0.00263749	0.0272093	5.85954e-05	0.0462228	0.191593	0.00764171	0.78005	0.95332	0.0204334		48.3628	39.5726	12.0646
cpx	Bishop Creek	SNB-18-29	18-29-cpx	53.4673	0.069236	0.644904	7.66868	0.268662	14.1092	24.1171	0.257815	0	0.024792	0.024072	100.652	76.6332		units	1.97455	0.0019228	0.0280693	0.000723882	0.0367123	0.200129	0.00840374	0.776769	0.954255	0.0184602		48.4919	39.4727	12.0354
cpx	Bishop Creek	SNB-18-29	18-29-cpx	53.1193	0.043221	0.430685	7.52186	0.267377	13.8379	24.7976	0.241176	0.002289	0.007232	0.015765	100.284	76.6316		units	1.97017	0.0012055	0.0188264	0.000212073	0.0555534	0.177756	0.00839964	0.765118	0.985415	0.0173433		49.672	38.5675	11.7605
cpx	Bishop Creek	SNB-18-29	18-29-cpx	53.2116	0.098443	0.664885	7.66743	0.240852	14.1037	23.8315	0.284457	0	0.017791	0.009852	100.13	76.6291		units	1.97428	0.00274668	0.029074	0.000521889	0.0368164	0.201091	0.007569	0.780089	0.947351	0.0204628		48.2027	39.6922	12.1051
cpx	Bishop Creek	SNB-18-29	18-29-cpx	53.108	0.09057	0.6214	7.61824	0.258064	14.0126	24.1038	0.251308	0	0.028067	0	100.092	76.6283		units	1.97204	0.00252907	0.0271946	0.000823999	0.0409439	0.19563	0.00811649	0.775677	0.958956	0.0180929		48.6482	39.3504	12.0015
cpx	Bishop Creek	SNB-18-29	18-29-cpx9-r	53.0159	0.080129	0.955334	7.53312	0.252985	13.8526	23.5392	0.271561	0.024153	0.00824	0	99.5333	76.6239		units	1.97967	0.00225008	0.0420434	0.000243271	0.0135261	0.221718	0.00800143	0.77113	0.941753	0.0196608		48.3415	39.5832	12.0754
cpx	Bishop Creek	SNB-18-29	18-29-cpx8-r	53.2735	0.075045	0.563131	7.70341	0.255892	14.1596	23.9631	0.275651	0.002712	0.003304	0	100.275	76.6162		units	1.97359	0.00209068	0.0245873	9.67745e-05	0.0437547	0.194908	0.00802949	0.781999	0.951145	0.0197994		48.2372	39.659	12.1038
cpx	Bishop Creek	SNB-18-29	18-29-cpx	53.2364	0.010311	0.308943	7.42308	0.26741	13.6411	24.9733	0.175174	0	0.00202	0	100.038	76.6119		units	1.98133	0.000288582	0.0135513	5.94394e-05	0.0357977	0.195242	0.00842968	0.756842	0.995821	0.0126405		50.2001	38.153	11.6469
cpx	Bishop Creek	SNB-18-29	18-29-cpx	52.9604	0.093109	0.606641	7.59134	0.257534	13.9468	24.1541	0.313086	0.001779	0	0.003619	99.9284	76.6074		units	1.96898	0.00260317	0.0265814	0	0.0528197	0.183209	0.00810981	0.772989	0.962139	0.0225684		48.8109	39.215	11.9741
cpx	Bishop Creek	SNB-18-29	18-29-cpx	53.0119	0.045771	0.458014	7.55978	0.285319	13.8865	24.3992	0.219261	0.004214	0.012876	0	99.8829	76.6044		units	1.97385	0.0012816	0.020099	0.00037905	0.0450894	0.19031	0.00899823	0.770802	0.973362	0.0158288		49.1705	38.938	11.8915
cpx	Bishop Creek	SNB-18-29	18-29-cpx	51.6987	0.267351	1.61784	7.96927	0.237635	14.6335	22.3009	0.412016	0.002693	0.007936	0	99.1478	76.598		units	1.92931	0.00750282	0.0711564	0.000234153	0.0848018	0.16391	0.00751135	0.814099	0.891666	0.0298114		45.6217	41.6531	12.7252
cpx	Bishop Creek	SNB-18-29	18-29-cpx	52.9315	0.094191	0.665455	7.78822	0.254568	14.2999	23.6711	0.257813	0.000888	0.016084	0.012345	99.992	76.5965		units	1.96575	0.00263054	0.0291266	0.000472264	0.0521958	0.189689	0.00800764	0.791691	0.941869	0.0185638		47.6788	40.0766	12.2446
cpx	Bishop Creek	SNB-18-29	18-29-cpx	52.7899	0.094426	0.678308	7.72014	0.26782	14.1718	23.6348	0.265884	0	0.01764	0	99.6407	76.5926		units	1.96753	0.00264656	0.0297956	0.000519809	0.0485529	0.192078	0.00845471	0.787413	0.9438	0.0192136		47.8638	39.9328	12.2033
cpx	Bishop Creek	SNB-18-29	18-29-cpx	53.4038	0.034468	0.370539	7.44902	0.302776	13.6644	24.9604	0.16496	0.007397	0.011042	0	100.369	76.58		units	1.98169	0.000961836	0.0162052	0.000323957	0.0300333	0.20113	0.00951637	0.7559	0.99237	0.0118683		50.134	38.1877	11.6783
cpx	Bishop Creek	SNB-18-29	18-29-cpx	53.2424	0.075936	0.69223	7.66597	0.268216	14.049	23.9818	0.269705	0.000934	0.029767	0	100.276	76.5629		units	1.97307	0.00211618	0.0302337	0.000872159	0.0378997	0.199679	0.0084189	0.77614	0.952191	0.0193785		48.4351	39.4799	12.0849
cpx	Bishop Creek	SNB-18-29	18-29-cpx7-r	52.8929	0.067488	0.505194	7.54727	0.290482	13.8285	24.5055	0.207583	0	0.012344	0	99.8573	76.559		units	1.97032	0.00189054	0.0221795	0.000363554	0.0480377	0.187079	0.00916523	0.767932	0.978045	0.0149926		49.3689	38.763	11.868
cpx	Bishop Creek	SNB-18-29	18-29-cpx	52.9657	0.084092	0.569402	7.64593	0.250099	14.0062	24.056	0.284015	0.002959	0.012644	0	99.877	76.555		units	1.97044	0.00235258	0.0249657	0.000371902	0.0495606	0.188318	0.00788073	0.776776	0.958847	0.020486		48.5861	39.3603	12.0536
cpx	Bishop Creek	SNB-18-29	18-29-cpx26-r	53.2197	0.078175	0.512157	7.62023	0.290455	13.9391	24.2755	0.227241	0.005374	0.026143	0	100.194	76.5293		units	1.97565	0.00218236	0.0224077	0.000767306	0.0375114	0.19906	0.00913277	0.771404	0.965526	0.0163558		48.9245	39.0881	11.9874
cpx	Bishop Creek	SNB-18-29	18-29-cpx4-c	53.1483	0.091663	0.597718	7.80266	0.283233	14.266	23.9078	0.267766	0.000852	0.010527	0	100.376	76.5208		units	1.96669	0.00255072	0.0260675	0.000307984	0.0543477	0.187113	0.00887722	0.786972	0.94786	0.019211		47.9615	39.8206	12.2179
cpx	Bishop Creek	SNB-18-29	18-29-cpx9-r	53.5442	0.019411	0.427822	7.50646	0.283523	13.7113	24.6265	0.186276	0	0.007102	0.006372	100.319	76.5035		units	1.9873	0.000541775	0.0187141	0.000208404	0.0188035	0.214189	0.00891301	0.75864	0.979288	0.0134046		49.6868	38.4917	11.8215
cpx	Bishop Creek	SNB-18-29	18-29-cpx	52.8208	0.061804	0.608674	7.67539	0.275438	14.0124	23.9782	0.257601	0	0.014332	0.016478	99.7212	76.494		units	1.96859	0.00173216	0.0267356	0.00042231	0.0508205	0.188404	0.00869479	0.778522	0.957469	0.0186142		48.4741	39.4145	12.1113
cpx	Bishop Creek	SNB-18-29	18-29-cpx24	52.7839	0.117577	0.655744	7.80915	0.256248	14.2484	23.6526	0.256577	0	0	0.020932	99.8011	76.4835		units	1.96454	0.00329082	0.0287641	0	0.0540814	0.188983	0.00807806	0.790559	0.943185	0.0185151		47.7125	39.9917	12.2958
cpx	Bishop Creek	SNB-18-29	18-29-cpx	52.9901	0.079583	0.551149	7.58718	0.269448	13.8408	24.4386	0.266399	0.000542	0.003441	0	100.027	76.4802		units	1.96972	0.0022246	0.0241454	0.000101128	0.0510587	0.184797	0.00848342	0.766973	0.973295	0.0191995		49.2528	38.812	11.9353
cpx	Bishop Creek	SNB-18-29	18-29-cpx26-r	52.9979	0.09661	0.667583	7.718	0.261997	14.0683	24.1421	0.296674	0.001722	0.031905	0	100.283	76.466		units	1.96338	0.00269146	0.0291478	0.000934501	0.0590859	0.180029	0.00822105	0.776954	0.958247	0.0213094		48.5357	39.3531	12.1113
cpx	Bishop Creek	SNB-18-29	18-29-cpx	53.2551	0.032384	0.432132	7.5504	0.289092	13.7626	24.6081	0.219777	0.000906	0.008288	0.007586	100.166	76.4658		units	1.97859	0.000904784	0.0189219	0.000243455	0.0376833	0.196912	0.00909736	0.762261	0.979558	0.0158315		49.5624	38.5679	11.8698
cpx	Bishop Creek	SNB-18-29	18-29-cpx	52.9956	0.113245	0.75958	7.69855	0.274447	14.022	23.861	0.280797	0	0.023149	0	100.028	76.452		units	1.96867	0.00316354	0.0332555	0.000679894	0.0426148	0.196551	0.00863531	0.776518	0.949684	0.0202243		48.3209	39.5101	12.169
cpx	Bishop Creek	SNB-18-29	18-29-cpx1-c	53.3688	0.090047	0.665274	7.66027	0.27211	13.9511	24.0179	0.284963	0.004581	0.003826	0	100.319	76.4505		units	1.97765	0.0025093	0.0290549	0.000112094	0.0309803	0.20641	0.00854069	0.770688	0.953577	0.0204738		48.6108	39.2876	12.1015
cpx	Bishop Creek	SNB-18-29	18-29-cpx4-r	53.0459	0.078728	0.601066	7.81355	0.27352	14.2092	23.7417	0.279303	0.00136	0.009324	0.011713	100.065	76.4239		units	1.96925	0.00219786	0.0262983	0.00027367	0.0506297	0.19195	0.00860051	0.786373	0.94432	0.0201035		47.8555	39.8512	12.2932
cpx	Bishop Creek	SNB-18-29	18-29-cpx9-r	53.1175	0.06398	0.564356	7.71436	0.271179	14.0259	24.0491	0.181006	0.00852	0	0.021004	100.017	76.4201		units	1.97575	0.00178962	0.0247403	0	0.0332269	0.20674	0.00854353	0.777739	0.958413	0.0130538		48.4998	39.3569	12.1433
cpx	Bishop Creek	SNB-18-29	18-29-cpx	53.1615	0.043348	0.446684	7.56515	0.29771	13.7502	24.7129	0.205763	0.00056	0.005354	0.004661	100.194	76.4143		units	1.97482	0.00121093	0.0195563	0.000157248	0.043038	0.191982	0.0093672	0.76146	0.983585	0.0148199		49.6744	38.4563	11.8693
cpx	Bishop Creek	SNB-18-29	18-29-cpx15-r	52.707	0.043241	0.455098	7.52849	0.290932	13.6832	24.3446	0.229748	0	0.014413	0.007831	99.3046	76.4139		units	1.97484	0.00121838	0.0200967	0.000426967	0.0440403	0.19186	0.00923298	0.764296	0.977294	0.0166903		49.4209	38.6498	11.9293
cpx	Bishop Creek	SNB-18-29	18-29-cpx	52.7775	0.099728	0.830316	7.57095	0.277853	13.759	23.7053	0.288896	0.005308	0.001162	0.007641	99.3237	76.4121		units	1.97542	0.00280703	0.0366276	3.43868e-05	0.0278561	0.209126	0.00880867	0.767726	0.950633	0.0209652		48.6172	39.263	12.1197
cpx	Bishop Creek	SNB-18-29	18-29-cpx22	53.1497	0.085351	0.792739	7.8127	0.277229	14.1977	23.4901	0.297017	0.009246	0.019442	0.032954	100.164	76.4113		units	1.97141	0.00238071	0.0346547	0.000570155	0.0385536	0.203791	0.00870965	0.78506	0.93351	0.0213602		47.6058	40.0354	12.3588
cpx	Bishop Creek	SNB-18-29	18-29-cpx	53.1986	0.03281	0.32838	7.55683	0.364396	13.7315	24.9433	0.192133	0.00409	0.027938	0.01029	100.39	76.4097		units	1.97346	0.00091528	0.0143569	0.000819404	0.0499001	0.184535	0.0114495	0.759371	0.991378	0.013819		49.9388	38.2519	11.8092
cpx	Bishop Creek	SNB-18-29	18-29-cpx16-c	53.0781	0.057263	0.530739	7.63663	0.282589	13.8751	24.5641	0.234494	0.002161	0.021496	0	100.283	76.4079		units	1.96865	0.00159715	0.0232	0.000630355	0.0525474	0.184322	0.00887755	0.76718	0.976137	0.0168628		49.2952	38.7428	11.962
cpx	Bishop Creek	SNB-18-29	18-29-cpx21-c	53.0609	0.100129	0.705065	7.76053	0.269382	14.0902	23.79	0.281368	0.000548	0	0.004062	100.062	76.395		units	1.97023	0.00279592	0.0308552	0	0.0433409	0.197645	0.00847223	0.779955	0.946445	0.0202565		48.1067	39.6442	12.249
cpx	Bishop Creek	SNB-18-29	18-29-cpx8-r	53.1703	0.057934	0.510225	7.59755	0.275378	13.7918	24.6635	0.247598	0.003728	0.012571	0	100.331	76.3917		units	1.97151	0.00161542	0.022297	0.000368532	0.0488822	0.186709	0.00864858	0.762358	0.97981	0.0178002		49.5414	38.5465	11.912
cpx	Bishop Creek	SNB-18-29	18-29-cpx	53.079	0.118661	0.721991	7.88364	0.266027	14.3031	23.3568	0.256871	0	0.016028	0	100.002	76.3817		units	1.97145	0.00331429	0.0316046	0.00047067	0.036901	0.207974	0.008369	0.791958	0.929464	0.018498		47.2698	40.2766	12.4536
cpx	Bishop Creek	SNB-18-29	18-29-cpx	52.9615	0.100044	0.647948	7.72788	0.257121	14.0151	24.037	0.325132	0	0.016877	0	100.089	76.3746		units	1.9657	0.00279234	0.0283434	0.000495253	0.0575776	0.182291	0.00808314	0.775462	0.95586	0.0233972		48.4915	39.3398	12.1687
cpx	Bishop Creek	SNB-18-29	18-29-cpx	52.9218	0.136334	0.750965	7.92022	0.293316	14.3621	23.648	0.265383	0.00703	0.013679	0.033544	100.352	76.3724		units	1.95909	0.00379528	0.0327638	0.000400358	0.0601207	0.185074	0.00919687	0.792586	0.937929	0.0190475		47.473	40.1165	12.4105
cpx	Bishop Creek	SNB-18-29	18-29-cpx	53.0125	0.107155	0.69912	7.76621	0.259386	14.0747	23.8178	0.273101	0	0.003595	0	100.014	76.3619		units	1.96954	0.00299378	0.0306122	0.000105599	0.0438792	0.197418	0.00816243	0.779531	0.948081	0.0196724		48.1526	39.592	12.2554
cpx	Bishop Creek	SNB-18-29	18-29-cpx	53.1242	0.038237	0.476399	7.60072	0.264653	13.7657	24.6365	0.225056	0	0.013086	0	100.145	76.35		units	1.9738	0.00106835	0.0208611	0.000384408	0.0452387	0.190929	0.0083286	0.762458	0.980724	0.0162124		49.5478	38.5207	11.9316
cpx	Bishop Creek	SNB-18-29	18-29-cpx3-c	53.1666	0.10928	0.689324	7.86117	0.280568	14.2246	23.7579	0.248043	0	0.01494	0.009504	100.362	76.3338		units	1.96866	0.00304294	0.0300823	0.00043738	0.0438804	0.199551	0.00879947	0.785203	0.942536	0.0178076		47.8161	39.8344	12.3496
cpx	Bishop Creek	SNB-18-29	18-29-cpx	51.7954	0.256943	1.67857	7.62736	0.269125	13.7974	23.7514	0.358976	0.014515	0.016792	0.01374	99.5802	76.3284		units	1.93088	0.00720314	0.0737497	0.000494928	0.0755349	0.162256	0.00849775	0.766777	0.94866	0.0259464		48.5688	39.2569	12.1742
cpx	Bishop Creek	SNB-18-29	18-29-cpx	53.0759	0.033053	0.330804	7.5716	0.278825	13.6948	24.8238	0.214462	0.004238	0.006564	0.028548	100.063	76.3261		units	1.97506	0.000924943	0.0145081	0.00019312	0.0487964	0.186832	0.00878822	0.759709	0.989712	0.0154732		49.8583	38.2715	11.8701
cpx	Bishop Creek	SNB-18-29	18-29-cpx	52.8703	0.144974	0.927555	8.06307	0.271328	14.5786	22.7801	0.307019	0.003365	0.023577	0.026599	99.9965	76.3197		units	1.9618	0.00404533	0.0405638	0.000691683	0.0491366	0.201071	0.00852754	0.806431	0.905643	0.022088		46.1526	41.0966	12.7508
cpx	Bishop Creek	SNB-18-29	18-29-cpx	53.0023	0.108183	0.697082	7.94328	0.27138	14.3595	23.4713	0.258621	0.003609	0.007783	0.042891	100.166	76.3166		units	1.96597	0.0030176	0.0304734	0.000228246	0.0499252	0.196473	0.00852599	0.794016	0.932773	0.0185991		47.2724	40.2403	12.4873
cpx	Bishop Creek	SNB-18-29	18-29-cpx	52.9943	0.051188	0.356679	7.654	0.278056	13.8296	24.4992	0.196593	0	0	0.033244	99.8928	76.3075		units	1.97489	0.00143451	0.0156656	0	0.0458934	0.192645	0.00877671	0.768301	0.978191	0.0142046		49.2784	38.7048	12.0169
cpx	Bishop Creek	SNB-18-29	18-29-cpx	52.5674	0.179136	1.03224	7.85552	0.271132	14.1896	23.2663	0.329543	0.002438	0.022205	0.027614	99.7431	76.3022		units	1.95681	0.00501459	0.0452865	0.000653518	0.0542024	0.190345	0.00854866	0.787426	0.927933	0.0237843		47.3458	40.1767	12.4775
cpx	Bishop Creek	SNB-18-29	18-29-cpx	53.0899	0.038209	0.361961	7.68729	0.277846	13.8765	24.4858	0.200985	0	0.014198	0.020057	100.053	76.2902		units	1.97486	0.00106884	0.0158688	0.000417569	0.0463438	0.192798	0.00875418	0.769508	0.975881	0.0144956		49.1744	38.7753	12.0503
cpx	Bishop Creek	SNB-18-29	18-29-cpx	52.9539	0.062554	0.560903	7.58826	0.288211	13.6968	24.5056	0.230879	0.001078	0.014509	0	99.9027	76.2891		units	1.97248	0.00175223	0.0246239	0.000427294	0.0431667	0.193214	0.00909307	0.760577	0.977996	0.0166742		49.5199	38.5111	11.9689
cpx	Bishop Creek	SNB-18-29	18-29-cpx	52.4695	0.080179	0.633656	7.60563	0.256617	13.7278	24.2805	0.262585	0.001891	0.022203	0.007084	99.3476	76.2885		units	1.96404	0.00225696	0.0279545	0.000657098	0.0578543	0.180232	0.00813606	0.766041	0.973773	0.0190572		49.2327	38.73	12.0373
cpx	Bishop Creek	SNB-18-29	18-29-cpx	52.2976	0.298211	1.67474	8.05819	0.249261	14.5393	22.4425	0.386353	0.000212	0.01747	0	99.9638	76.2818		units	1.93823	0.00831129	0.0731523	0.000511909	0.0610095	0.188747	0.00782464	0.803295	0.891153	0.0277623		45.8364	41.3174	12.8462
cpx	Bishop Creek	SNB-18-29	18-29-cpx14-c	53.1558	0.055323	0.428872	7.69547	0.250611	13.8678	24.6013	0.212165	0.001234	0.021794	0.032598	100.323	76.2597		units	1.97218	0.00154356	0.0187534	0.000639306	0.0484167	0.190358	0.00787557	0.767031	0.977938	0.0152622		49.2976	38.6658	12.0366
cpx	Bishop Creek	SNB-18-29	18-29-cpx	52.4349	0.26727	1.52808	8.14733	0.250915	14.6766	22.4374	0.355246	0.001108	0.014058	0	100.113	76.2529		units	1.94056	0.00743838	0.0666513	0.000411345	0.0624268	0.189735	0.00786538	0.809732	0.889687	0.0254908		45.588	41.4911	12.9209
cpx	Bishop Creek	SNB-18-29	18-29-cpx15-c	53.0093	0.130487	0.73549	7.87677	0.27403	14.1864	23.7249	0.256324	0	0	0.018928	100.213	76.2493		units	1.96589	0.0036391	0.0321469	0	0.0472343	0.197058	0.00860775	0.784309	0.942689	0.0184307		47.8209	39.7866	12.3925
cpx	Bishop Creek	SNB-18-29	18-29-cpx	53.1451	0.064802	0.897472	7.49612	0.247012	13.4974	24.0395	0.223232	0.038048	0	0.021844	99.6706	76.2447		units	1.98599	0.00182105	0.0395266	0	0.00103475	0.233229	0.00781837	0.751921	0.96249	0.0161739		49.392	38.5863	12.0217
cpx	Bishop Creek	SNB-18-29	18-29-cpx	53.1795	0.02111	0.349941	7.62768	0.263647	13.7331	24.5643	0.20129	0.002889	0.00883	0.025646	99.9778	76.2431		units	1.98064	0.000591249	0.0153607	0.000260015	0.0364513	0.201129	0.00831707	0.762496	0.980218	0.0145355		49.4986	38.5042	11.9972
cpx	Bishop Creek	SNB-18-29	18-29-cpx	53.2864	0.031517	1.20547	7.32167	0.285796	13.175	24.1366	0.51147	0.008405	0	0	99.9623	76.2332		units	1.98112	0.000881169	0.0528208	0	0.0200522	0.207594	0.00899985	0.730215	0.961451	0.0368689		50.0935	38.0457	11.8608
cpx	Bishop Creek	SNB-18-29	18-29-cpx	53.2757	0.057183	0.462631	7.67419	0.277243	13.8063	24.6058	0.226868	0	0.009671	0.009393	100.405	76.2292		units	1.97484	0.00159401	0.0202112	0.000283432	0.0429467	0.194951	0.0087046	0.762934	0.977231	0.0163051		49.4034	38.5698	12.0268
cpx	Bishop Creek	SNB-18-29	18-29-cpx8-c	53.0993	0.0899	0.730642	7.7985	0.259458	14.0286	23.9328	0.28481	0	0.006777	0.051356	100.282	76.2276		units	1.96878	0.00250663	0.0319278	0.000198665	0.0457691	0.196042	0.00814821	0.775412	0.950739	0.0204744		48.3108	39.4018	12.2874
cpx	Bishop Creek	SNB-18-29	18-29-cpx	52.9627	0.068462	0.519635	7.6833	0.273555	13.8192	24.4189	0.263155	0.007674	0.016313	0.02109	100.054	76.2248		units	1.96941	0.00191441	0.022773	0.000479595	0.0530799	0.185849	0.0086158	0.766052	0.972858	0.0189725		49.1879	38.7318	12.0803
cpx	Bishop Creek	SNB-18-29	18-29-cpx	52.8691	0.07871	0.667765	7.79014	0.256527	14.0098	24.0059	0.266483	0.005023	0	0	99.9494	76.2227		units	1.96595	0.00220101	0.0292651	0	0.0536427	0.188612	0.00807959	0.776622	0.956414	0.0192126		48.4189	39.3169	12.2642
cpx	Bishop Creek	SNB-18-29	18-29-cpx	52.8458	0.089838	0.653942	7.63803	0.268519	13.7344	24.3079	0.246012	0	0.011221	0	99.7956	76.2202		units	1.96996	0.00251841	0.0287304	0.000330714	0.0437669	0.194346	0.00847826	0.763244	0.970846	0.0177807		49.2265	38.7001	12.0735
cpx	Bishop Creek	SNB-18-29	18-29-cpx	52.7384	0.233987	1.39135	8.10434	0.274085	14.561	22.5351	0.373564	0.004698	0.005385	0	100.222	76.2055		units	1.95068	0.00650835	0.0606526	0.000157478	0.0516116	0.199075	0.00858676	0.802894	0.893048	0.0267898		45.8766	41.2454	12.878
cpx	Bishop Creek	SNB-18-29	18-29-cpx	53.3693	0.053633	0.457155	7.73194	0.273888	13.8804	24.3114	0.223192	0	0.010099	0.007921	100.319	76.1904		units	1.97981	0.00149618	0.0199871	0.0002962	0.0331603	0.20671	0.00860578	0.767611	0.966272	0.016053		48.9561	38.8909	12.153
cpx	Bishop Creek	SNB-18-29	18-29-cpx	52.7301	0.171473	1.02	8.02771	0.246614	14.4035	22.9912	0.301403	0.002438	0.000115	0	99.8945	76.1805		units	1.95889	0.00479036	0.0446588	3.37773e-06	0.0496788	0.199723	0.00775989	0.797678	0.915104	0.0217093		46.637	40.6526	12.7104
cpx	Bishop Creek	SNB-18-29	18-29-cpx7-c	53.0473	0.081908	0.432833	7.74712	0.281901	13.8925	24.3713	0.255521	0.003292	0.014933	0	100.129	76.1707		units	1.97081	0.00228838	0.0189521	0.000438635	0.0528221	0.187878	0.00887081	0.769433	0.970103	0.0184058		48.9893	38.8556	12.1551
cpx	Bishop Creek	SNB-18-29	18-29-cpx	53.1589	0.05936	0.450616	7.63334	0.274205	13.6866	24.8242	0.219238	0.002216	0.005935	0.016637	100.331	76.1682		units	1.97285	0.00165666	0.0197097	0.000174146	0.0468783	0.190035	0.00861945	0.757223	0.987079	0.0157754		49.8219	38.2201	11.958
cpx	Bishop Creek	SNB-18-29	18-29-cpx	52.7262	0.04233	0.539305	7.6268	0.271035	13.6581	24.0922	0.212148	0.0064	0.014844	0.034086	99.2234	76.1458		units	1.9785	0.00119448	0.0238507	0.000440389	0.0317473	0.207589	0.00861433	0.764026	0.9686	0.0154346		49.1186	38.7444	12.137
cpx	Bishop Creek	SNB-18-29	18-29-cpx	52.9835	0.058471	0.547097	7.73009	0.245217	13.8428	24.3143	0.234168	0	0.009474	0	99.9651	76.1455		units	1.97161	0.00163622	0.0239938	0.000278733	0.046136	0.194422	0.00772887	0.767912	0.969391	0.0168948		49.0121	38.8254	12.1626
cpx	Bishop Creek	SNB-18-29	18-29-cpx	53.3538	0.03346	0.382514	7.73771	0.253584	13.8549	24.5876	0.19845	0.004202	0	0.031178	100.437	76.1436		units	1.97793	0.000932808	0.0167128	0	0.0398243	0.200067	0.00796257	0.7657	0.976606	0.0142641		49.2689	38.6289	12.1023
cpx	Bishop Creek	SNB-18-29	18-29-cpx27-r	53.3338	0.070537	0.603653	7.85159	0.261869	14.0518	23.8833	0.258156	0	0.004995	0	100.32	76.1345		units	1.97665	0.00196592	0.0263676	0.000146365	0.0348084	0.208547	0.00822048	0.776371	0.948375	0.0185505		48.1873	39.4477	12.365
cpx	Bishop Creek	SNB-18-29	18-29-cpx21-c	53.1019	0.10476	0.685576	8.01977	0.26525	14.3457	23.4064	0.269566	0.002179	0.01397	0.000912	100.216	76.1254		units	1.96823	0.00292	0.0299487	0.000409391	0.0467069	0.201884	0.00832736	0.792677	0.929521	0.0193722		47.1649	40.2213	12.6138
cpx	Bishop Creek	SNB-18-29	18-29-cpx	52.9766	0.04901	0.486382	7.65783	0.2766	13.6859	24.6553	0.245817	0.007296	0.013601	0	100.054	76.109		units	1.97065	0.00137098	0.0213236	0.000400012	0.0519549	0.186271	0.00871494	0.75894	0.982642	0.017729		49.6332	38.334	12.0328
cpx	Bishop Creek	SNB-18-29	18-29-cpx	53.2899	0.027366	0.38927	7.59002	0.284609	13.5599	25.1272	0.18969	0.001321	0.015179	0.0263	100.501	76.1026		units	1.97601	0.00076309	0.0170118	0.000445002	0.0426385	0.192727	0.00893878	0.749566	0.998264	0.0136375		50.3361	37.7959	11.868
cpx	Bishop Creek	SNB-18-29	18-29-cpx	53.1231	0.029967	0.435608	7.6178	0.269921	13.601	24.6908	0.221533	0	0.001073	0	99.9909	76.0912		units	1.97817	0.000839158	0.0191175	3.15904e-05	0.0388278	0.1984	0.00851338	0.755024	0.985083	0.0159943		49.8187	38.1839	11.9974
cpx	Bishop Creek	SNB-18-29	18-29-cpx	52.9342	0.153191	0.899832	8.05894	0.265606	14.3822	22.9468	0.310928	0	0.00442	0	99.9562	76.0831		units	1.96586	0.00427829	0.0393853	0.000129782	0.0425915	0.207703	0.00835488	0.796253	0.913054	0.0223884		46.5939	40.6334	12.7727
cpx	Bishop Creek	SNB-18-29	18-29-cpx	53.0592	0.052039	0.493418	7.69406	0.269534	13.7199	24.518	0.214468	0	0.026076	0	100.047	76.0683		units	1.97428	0.00145612	0.021638	0.00076712	0.0416022	0.197817	0.00849467	0.761037	0.977439	0.0154724		49.4182	38.4771	12.1047
cpx	Bishop Creek	SNB-18-29	18-29-cpx	52.6514	0.129743	0.865252	8.10298	0.247597	14.4484	23.01	0.278863	0.00305	0.016855	0	99.7542	76.0675		units	1.9591	0.00363037	0.0379441	0.00049585	0.0562232	0.19592	0.00780328	0.801448	0.91732	0.020118		46.5429	40.6638	12.7932
cpx	Bishop Creek	SNB-18-29	18-29-cpx	52.9897	0.027668	0.457108	7.63393	0.299905	13.611	24.5484	0.237371	0.000913	0.007628	0.034574	99.8482	76.0661		units	1.97638	0.000776028	0.0200934	0.000224939	0.0425357	0.195577	0.00947433	0.756794	0.980979	0.0171654		49.6476	38.3015	12.0509
cpx	Bishop Creek	SNB-18-29	18-29-cpx	53.3168	0.047863	0.519502	7.76131	0.300254	13.8324	24.3767	0.232648	0.00465	0.012266	0	100.404	76.0586		units	1.97636	0.0013342	0.0226957	0.000359484	0.0382862	0.202312	0.00942704	0.764378	0.968132	0.0167204		49.0663	38.7398	12.1939
cpx	Bishop Creek	SNB-18-29	18-29-cpx	53.2528	0.034755	0.428053	7.78681	0.292817	13.8618	24.5284	0.231805	0	0.012731	0.005681	100.436	76.0374		units	1.97328	0.000968467	0.0186939	0.000372979	0.0490879	0.192215	0.00919028	0.765727	0.97381	0.0166539		49.1615	38.6567	12.1818
cpx	Bishop Creek	SNB-18-29	18-29-cpx	52.6288	0.253732	1.38224	8.11794	0.256856	14.4428	22.5981	0.40694	0.004645	0.002673	0.002611	100.097	76.0268		units	1.94941	0.00706768	0.060342	7.82808e-05	0.0558424	0.195626	0.00805854	0.797517	0.896829	0.0292252		46.0902	40.9863	12.9235
cpx	Bishop Creek	SNB-18-29	18-29-cpx	52.9022	0.030342	0.435325	7.7521	0.299898	13.7913	24.5066	0.228434	0.001574	0.006634	0	99.9543	76.026		units	1.96956	0.000849496	0.0191014	0.000195275	0.056371	0.184992	0.00945705	0.765437	0.977545	0.0164894		49.2628	38.5738	12.1634
cpx	Bishop Creek	SNB-18-29	18-29-cpx	53.3355	0.048128	0.426985	7.65437	0.264151	13.6098	24.8005	0.209876	0.001203	0.018	0	100.369	76.0157		units	1.97939	0.00134318	0.018676	0.000528157	0.0344308	0.203133	0.00830334	0.752965	0.986128	0.0151016		49.8887	38.0929	12.0185
cpx	Bishop Creek	SNB-18-29	18-29-cpx	52.6939	0.086298	0.641656	7.8203	0.273309	13.8998	23.996	0.273391	0.003761	0	0.001161	99.6897	76.0092		units	1.96532	0.00242044	0.0282053	0	0.0560908	0.187831	0.00863399	0.772841	0.958891	0.0197698		48.5353	39.1182	12.3464
cpx	Bishop Creek	SNB-18-29	18-29-cpx	52.9787	0.075368	0.534675	7.86572	0.281977	13.967	24.1128	0.247941	0	0.017313	0.025364	100.107	75.9914		units	1.96886	0.00210631	0.0234185	0.0005087	0.0519975	0.192463	0.00887593	0.773793	0.960107	0.0178653		48.5304	39.1128	12.3567
cpx	Bishop Creek	SNB-18-29	18-29-cpx	53.003	0.039463	0.764851	7.96987	0.272504	14.1438	22.8252	0.220523	0.013591	0.000133	0	99.2529	75.981		units	1.98517	0.0011115	0.0337621	3.93844e-06	0.00969166	0.239942	0.00864481	0.789718	0.915945	0.0160139		46.8443	40.3886	12.7671
cpx	Bishop Creek	SNB-18-29	18-29-cpx	52.845	0.123021	0.774393	7.8614	0.251892	13.9363	23.8415	0.301401	0.002279	0.028371	0	99.9655	75.9613		units	1.96515	0.00344026	0.0339397	0.000834144	0.0497865	0.194695	0.00793398	0.772585	0.949908	0.0217311		48.2928	39.2778	12.4293
cpx	Bishop Creek	SNB-18-29	18-29-cpx	53.0279	0.048416	0.45187	7.57831	0.249156	13.433	24.7061	0.196253	0	0.01678	0	99.7077	75.9594		units	1.9817	0.00136064	0.0199023	0.000495793	0.0277019	0.209142	0.00788661	0.748367	0.989225	0.0142199		50.1016	37.9028	11.9955
cpx	Bishop Creek	SNB-18-29	18-29-cpx	53.2202	0.063205	0.960899	7.55502	0.246588	13.3891	23.7807	0.225811	0.033921	0.004477	0	99.48	75.9558		units	1.99312	0.00178004	0.0424122	0.000132562	0	0.236619	0.00782196	0.747511	0.954203	0.0163964		49.228	38.5646	12.2073
cpx	Bishop Creek	SNB-18-29	18-29-cpx18-r	52.7873	0.049305	0.544248	7.70263	0.288874	13.6406	24.4531	0.275027	0.00221	0.026932	0	99.7702	75.9424		units	1.96892	0.00138297	0.023925	0.000794225	0.0545593	0.185708	0.00912628	0.758477	0.977215	0.0198894		49.4552	38.3853	12.1595
cpx	Bishop Creek	SNB-18-29	18-29-cpx26-r	53.1313	0.090025	0.574989	7.87593	0.288343	13.9473	23.8779	0.267618	0	0.022313	0	100.076	75.942		units	1.97479	0.00251625	0.0251875	0.000655698	0.038832	0.205978	0.00907749	0.772804	0.950875	0.0192856		48.3048	39.2587	12.4364
cpx	Bishop Creek	SNB-18-29	18-29-cpx26-r	53.2502	0.072948	0.608116	7.80252	0.268449	13.8105	24.2376	0.259903	0	0.025904	0	100.336	75.9331		units	1.97487	0.00203447	0.0265803	0.000759557	0.0375303	0.204466	0.00843268	0.763549	0.963084	0.0186886		48.9216	38.7858	12.2926
cpx	Bishop Creek	SNB-18-29	18-29-cpx	53.4156	0.004043	0.22679	7.68357	0.271202	13.5994	25.0046	0.147378	0	0.002975	0.049485	100.405	75.9323		units	1.98399	0.000112927	0.00992777	8.73644e-05	0.0323897	0.206277	0.008532	0.753008	0.995061	0.0106133		50.0852	37.9018	12.013
cpx	Bishop Creek	SNB-18-29	18-29-cpx27-r	53.3434	0.040489	0.477438	7.77363	0.287229	13.758	24.3486	0.239232	0.002927	0.01319	0.010168	100.294	75.9312		units	1.98022	0.00113029	0.0208884	0.000387127	0.0332389	0.208092	0.00903123	0.761371	0.968421	0.0172186		49.1304	38.6263	12.2433
cpx	Bishop Creek	SNB-18-29	18-29-cpx	52.9094	0.045697	0.498194	7.7382	0.28442	13.6929	24.61	0.242288	0.000964	0.019576	0.00916	100.051	75.9281		units	1.96856	0.00127857	0.0218459	0.000575857	0.0553809	0.185394	0.00896316	0.759488	0.981036	0.0174781		49.5148	38.3328	12.1524
cpx	Bishop Creek	SNB-18-29	18-29-cpx	53.4384	0.043217	0.452683	7.79316	0.320502	13.7674	24.6312	0.232166	0	0.021736	0	100.7	75.8978		units	1.976	0.00120174	0.0197281	0.000635462	0.0418698	0.199123	0.0100381	0.758918	0.975837	0.0166449		49.3908	38.4117	12.1976
cpx	Bishop Creek	SNB-18-29	18-29-cpx	53.1829	0.03877	0.457002	7.80971	0.297165	13.7885	24.5019	0.232746	0.000873	0.021236	0.045414	100.376	75.8871		units	1.97323	0.00108174	0.0199839	0.000622952	0.047509	0.194816	0.00933877	0.762663	0.974011	0.0167431		49.2174	38.5378	12.2448
cpx	Bishop Creek	SNB-18-29	18-29-cpx	53.1566	0.041671	0.487892	7.78461	0.282541	13.7426	24.3276	0.251836	0.006576	0.014639	0	100.097	75.885		units	1.97674	0.00116532	0.0213832	0.000430407	0.040536	0.201559	0.00889938	0.761852	0.969279	0.0181575		49.1216	38.6095	12.269
cpx	Bishop Creek	SNB-18-29	18-29-cpx	52.5795	0.123884	0.830058	8.13072	0.265033	14.3275	23.1874	0.299469	0	0.004521	0.031276	99.7794	75.8517		units	1.95715	0.00346771	0.0364142	0.000133051	0.0638371	0.189263	0.00835589	0.795037	0.924734	0.0216125		46.8725	40.2985	12.829
cpx	Bishop Creek	SNB-18-29	18-29-cpx27-c	53.0601	0.05223	0.522294	7.76557	0.283665	13.6806	24.4243	0.245399	0.002531	0	0	100.037	75.8471		units	1.97454	0.00146164	0.0229071	0	0.0427924	0.19888	0.00894108	0.758951	0.973819	0.0177059		49.3212	38.4387	12.24
cpx	Bishop Creek	SNB-18-29	18-29-cpx	53.1966	0.041138	0.480911	7.81949	0.265329	13.7722	24.418	0.255305	0.00032	0.006083	0.024781	100.28	75.8425		units	1.9748	0.00114842	0.0210406	0.000178538	0.0452686	0.197489	0.00834274	0.762167	0.971194	0.0183757		49.1466	38.5689	12.2845
cpx	Bishop Creek	SNB-18-29	18-29-cpx	52.3348	0.081876	0.94786	7.95799	0.254614	14.0139	23.2603	0.247318	0.02371	0.00655	0.011205	99.1401	75.8395		units	1.96228	0.00230859	0.0418861	0.000194172	0.0467291	0.202804	0.00808608	0.783314	0.934422	0.0179793		47.4984	39.8173	12.6843
cpx	Bishop Creek	SNB-18-29	18-29-cpx3-r	52.9311	0.085828	0.851359	8.11762	0.216847	14.2892	23.1078	0.180689	0.04916	0	0	99.8296	75.8321		units	1.9717	0.00240425	0.0373765	0	0.0274577	0.225423	0.00684179	0.7935	0.922244	0.01305		46.8471	40.3073	12.8455
cpx	Bishop Creek	SNB-18-29	18-29-cpx	52.6122	0.073892	0.629556	7.79066	0.261764	13.7119	24.3068	0.272163	0.000681	0.016766	0	99.6763	75.8297		units	1.96366	0.00207395	0.0276931	0.00049475	0.0600293	0.183141	0.00827517	0.762932	0.972	0.019695		49.138	38.5689	12.2931
cpx	Bishop Creek	SNB-18-29	18-29-cpx18-c	52.4512	0.309892	1.24852	8.37772	0.267479	14.7451	20.7801	0.22693	0.092497	0.021873	0	98.5213	75.8297		units	1.97759	0.00878641	0.0554795	0.000652025	0	0.264157	0.00854193	0.828774	0.839432	0.016589		43.4407	42.8891	13.6702
cpx	Bishop Creek	SNB-18-29	18-29-cpx26-r	53.2656	0.01404	0.335301	7.72776	0.238436	13.5917	24.8492	0.19093	0.001757	0	0	100.215	75.817		units	1.98028	0.000392526	0.0146917	0	0.0377203	0.202544	0.00750823	0.753292	0.989806	0.0137626		49.9054	37.9806	12.114
cpx	Bishop Creek	SNB-18-29	18-29-cpx	52.5763	0.264497	1.57117	8.30152	0.247213	14.5942	22.346	0.330191	0.003231	0.007536	0	100.242	75.8086		units	1.94505	0.00735839	0.0685045	0.000220423	0.0501364	0.206699	0.00774637	0.804876	0.885723	0.0236839		45.4815	41.3301	13.1884
cpx	Bishop Creek	SNB-18-29	18-29-cpx26-r	52.8462	0.068805	0.686776	7.80269	0.29116	13.7168	23.8675	0.233361	0.021756	0.000547	0	99.5355	75.8079		units	1.97643	0.00193513	0.0302719	1.61745e-05	0.0298938	0.214151	0.0092233	0.764766	0.956386	0.0169217		48.6662	38.9155	12.4183
cpx	Bishop Creek	SNB-18-29	18-29-cpx9-c	52.953	0.052175	0.546649	7.79934	0.274635	13.7018	24.2037	0.240763	0.006738	0.027312	0.014505	99.8205	75.7958		units	1.97515	0.0014635	0.0240311	0.000805451	0.0393454	0.203944	0.00867664	0.761897	0.967273	0.0174119		49.0389	38.6267	12.3343
cpx	Bishop Creek	SNB-18-29	18-29-cpx	53.112	0.043045	0.446002	7.82684	0.279318	13.7496	24.5157	0.215692	0.002899	0.011479	0.001822	100.204	75.7951		units	1.97363	0.00120286	0.0195329	0.000337251	0.0460012	0.197228	0.0087914	0.761676	0.976059	0.0155401		49.2719	38.4498	12.2783
cpx	Bishop Creek	SNB-18-29	18-29-cpx	52.9759	0.147921	0.907596	8.23549	0.258286	14.4565	22.8713	0.331183	0	0.003181	0.020476	100.208	75.7811		units	1.96274	0.0041213	0.0396307	9.318e-05	0.0503483	0.204821	0.00810533	0.798462	0.90789	0.0237902		46.285	40.7062	13.0088
cpx	Bishop Creek	SNB-18-29	18-29-cpx	53.1105	0.059772	0.523509	7.82871	0.251063	13.7318	24.2992	0.249403	0.002979	0.00268	0.008851	100.068	75.767		units	1.97578	0.00167215	0.0229529	7.88257e-05	0.0400565	0.203502	0.0079109	0.761543	0.968517	0.017989		49.0732	38.5861	12.3407
cpx	Bishop Creek	SNB-18-29	18-29-cpx	53.3281	0.053737	0.462229	7.87005	0.310721	13.8023	24.5025	0.223562	0.001259	0.012045	0.004379	100.571	75.7643		units	1.97458	0.00149628	0.0201712	0.000352615	0.0433784	0.20032	0.00974484	0.761865	0.972045	0.0160496		49.1526	38.5246	12.3229
cpx	Bishop Creek	SNB-18-29	18-29-cpx	52.3355	0.280441	1.56748	8.12917	0.27283	14.2522	22.7904	0.453634	0.002881	0	0.02268	100.107	75.7585		units	1.93894	0.00781322	0.0684425	0	0.0706413	0.181225	0.00856142	0.787152	0.904642	0.0325852		46.5432	40.4984	12.9583
cpx	Bishop Creek	SNB-18-29	18-29-cpx	53.1187	0.035021	0.480181	7.78673	0.294968	13.6497	24.626	0.246801	0.000908	0.021024	0.030409	100.29	75.7556		units	1.97282	0.000978113	0.0210184	0.000617349	0.0485403	0.193312	0.00927899	0.755739	0.979923	0.0177719		49.5533	38.2166	12.2301
cpx	Bishop Creek	SNB-18-29	18-29-cpx26-c	53.0648	0.087576	0.579373	7.99995	0.279458	14.0218	23.9588	0.258093	0	0.00244	0	100.252	75.7534		units	1.96872	0.00244334	0.0253333	7.1572e-05	0.05083	0.197381	0.00878173	0.775513	0.952359	0.0185652		48.1943	39.245	12.5608
cpx	Bishop Creek	SNB-18-29	18-29-cpx	52.9592	0.03509	0.514773	7.83044	0.281396	13.723	24.3634	0.25205	0.002048	0.00038	0	99.9618	75.7512		units	1.97187	0.000982521	0.0225896	1.11866e-05	0.0498835	0.193942	0.00887445	0.76172	0.971927	0.0181958		49.15	38.5199	12.3302
cpx	Bishop Creek	SNB-18-29	18-29-cpx	53.4816	0.047308	0.455627	7.811	0.31517	13.6752	24.5446	0.238484	0	0.01394	0	100.583	75.7327		units	1.9806	0.00131749	0.0198865	0.000408161	0.0329873	0.208924	0.00988607	0.75498	0.973883	0.0171238		49.4163	38.3088	12.2749
cpx	Bishop Creek	SNB-18-29	18-29-cpx	53.0461	0.020307	0.37462	7.71845	0.264004	13.508	24.6982	0.189128	0.005306	0	0	99.824	75.7257		units	1.98031	0.000570093	0.0164826	0	0.0354556	0.205516	0.00834786	0.751759	0.987874	0.0136893		49.8774	37.956	12.1665
cpx	Bishop Creek	SNB-18-29	18-29-cpx	52.2725	0.065373	0.522121	7.78276	0.240983	13.6133	24.0053	0.269371	0	0.01736	0.007109	98.7962	75.716		units	1.96884	0.00185164	0.0231774	0.000516966	0.0545975	0.19055	0.00768793	0.764382	0.968728	0.0196714		48.9688	38.6392	12.3921
cpx	Bishop Creek	SNB-18-29	18-29-cpx	53.16	0.037942	0.510817	7.84089	0.282185	13.6866	24.3935	0.236501	0.00119	0.01077	0.019268	100.18	75.6777		units	1.97634	0.00106076	0.0223819	0.000316568	0.0395492	0.204231	0.00888579	0.758541	0.971647	0.0170473		49.223	38.4272	12.3497
cpx	Bishop Creek	SNB-18-29	18-29-cpx20-c	52.4753	0.159237	0.899625	8.21093	0.287569	14.3108	23.007	0.262259	0.006492	0	0	99.6192	75.6498		units	1.95697	0.00446575	0.0395409	0	0.0565433	0.199538	0.00908359	0.795612	0.919279	0.018963		46.6409	40.3665	12.9926
cpx	Bishop Creek	SNB-18-29	18-29-cpx	52.8319	0.045968	0.543704	7.73589	0.27705	13.4821	24.4695	0.26806	0.002007	0.023488	0.004502	99.6841	75.6488		units	1.97382	0.00129148	0.0239403	0.000693798	0.0445556	0.197145	0.00876709	0.750891	0.979476	0.0194174		49.6675	38.0763	12.2562
cpx	Bishop Creek	SNB-18-29	18-29-cpx	54.6546	0.007945	0.752898	7.41442	0.26626	12.9107	23.6	0.18539	0.035329	0.005043	0.007757	99.8403	75.6329		units	2.04566	0.000223625	0.0332122	0.000149235	0	0.232081	0.00844107	0.720384	0.946399	0.0134536		49.8403	37.9376	12.2221
cpx	Bishop Creek	SNB-18-29	18-29-cpx	53.272	0.063644	0.561444	7.83193	0.308475	13.6366	24.2989	0.235753	0.000502	0.016424	0	100.226	75.6314		units	1.9799	0.00177878	0.0245927	0.000482611	0.0285608	0.214866	0.00971067	0.75554	0.967583	0.0169882		49.2021	38.4196	12.3784
cpx	Bishop Creek	SNB-18-29	18-29-cpx18-c	52.7792	0.048992	0.536847	7.88636	0.296373	13.7159	24.3327	0.230844	0.002454	0.003448	0	99.8331	75.6106		units	1.96822	0.0013739	0.0235948	0.000101661	0.0538086	0.192139	0.00936127	0.762504	0.972206	0.0166907		49.085	38.4975	12.4175
cpx	Bishop Creek	SNB-18-29	18-29-cpx	52.871	0.059767	0.562421	7.85564	0.275052	13.6412	24.2972	0.257829	0.002711	0.000444	0.011443	99.8347	75.5819		units	1.97188	0.00167628	0.0247219	1.30925e-05	0.0467888	0.198231	0.00868889	0.758446	0.970905	0.0186441		49.1754	38.4146	12.41
cpx	Bishop Creek	SNB-18-29	18-29-cpx	53.0059	0.049485	0.421357	7.79493	0.288345	13.5351	24.75	0.197588	0	0.016028	0.027317	100.086	75.581		units	1.97427	0.00138604	0.0184964	0.000471994	0.0439956	0.198805	0.00909661	0.75154	0.987673	0.0142688		49.8318	37.918	12.2502
cpx	Bishop Creek	SNB-18-29	18-29-cpx17-r	53.3985	0.04128	0.525417	7.83048	0.272735	13.591	24.715	0.211224	0	0.000687	0	100.586	75.5731		units	1.9781	0.00114995	0.0229392	2.01211e-05	0.03371	0.208875	0.00855748	0.750549	0.980928	0.0151708		49.6908	38.0205	12.2886
cpx	Bishop Creek	SNB-18-29	18-29-cpx	52.8328	0.052013	0.546617	7.84512	0.290414	13.6056	24.549	0.233663	0	0.000809	0	99.9561	75.5585		units	1.96841	0.00145728	0.0240022	2.38306e-05	0.0531252	0.191312	0.00916462	0.755682	0.979947	0.0168791		49.4906	38.1645	12.3449
cpx	Bishop Creek	SNB-18-29	18-29-cpx	52.84	0.030179	0.478015	7.84295	0.277014	13.5826	24.5965	0.231895	0.000788	0.014977	0	99.8949	75.5323		units	1.97012	0.000846168	0.0210053	0.0004415	0.0533789	0.19117	0.00874819	0.754957	0.982567	0.0167637		49.5727	38.0893	12.3381
cpx	Bishop Creek	SNB-18-29	18-29-cpx	53.1073	0.035008	0.46958	7.87507	0.26474	13.6189	24.5653	0.224167	0.004475	0.011102	0	100.176	75.506		units	1.97493	0.000979008	0.0205809	0.000326419	0.0434295	0.201482	0.0083388	0.755002	0.978765	0.0161628		49.4656	38.1569	12.3775
cpx	Bishop Creek	SNB-18-29	18-29-cpx	53.0328	0.061754	0.577667	7.8869	0.275489	13.6349	24.2714	0.251109	0.001817	0.01938	0	100.013	75.5		units	1.97474	0.00172922	0.0253512	0.00057055	0.0392751	0.206324	0.0086887	0.756879	0.968316	0.018129		49.1333	38.4048	12.4619
cpx	Bishop Creek	SNB-18-29	18-29-cpx	52.8186	0.052555	0.54022	7.85895	0.267779	13.5842	24.462	0.240501	0.00051	0.008376	0.00203	99.8358	75.4968		units	1.97035	0.00147432	0.0237511	0.000247041	0.0497444	0.195431	0.00846095	0.755441	0.977703	0.0173949		49.4209	38.186	12.3931
cpx	Bishop Creek	SNB-18-29	18-29-cpx	53.3052	0.014285	0.364264	7.81912	0.316173	13.5047	24.8528	0.245047	0.003794	0.018441	0	100.444	75.4821		units	1.9779	0.000398598	0.0159297	0.000540996	0.0445627	0.19807	0.00993676	0.747011	0.988023	0.0176291		49.959	37.7724	12.2686
cpx	Bishop Creek	SNB-18-29	18-29-cpx	52.9493	0.008495	0.418516	7.79844	0.316696	13.4565	24.5293	0.182462	0.004232	0.015734	0	99.6797	75.465		units	1.9804	0.000238933	0.0184485	0.000465272	0.0330392	0.210886	0.0100328	0.750297	0.98296	0.0132316		49.7152	37.9478	12.337
cpx	Bishop Creek	SNB-18-29	18-29-cpx6-c	53.0233	0.057063	0.509558	7.90529	0.281836	13.6337	24.4501	0.230402	0.006841	0.004918	0	100.103	75.4553		units	1.97318	0.00159689	0.0223485	0.000144698	0.0445777	0.201444	0.00888346	0.756351	0.97485	0.0166239		49.304	38.2532	12.4428
cpx	Bishop Creek	SNB-18-29	18-29-cpx24	52.5601	0.168101	1.01809	8.24826	0.278957	14.1912	22.727	0.358079	0.006379	0.011497	0.025043	99.5926	75.4109		units	1.96065	0.00471559	0.0447595	0.000339082	0.0500602	0.207254	0.0088139	0.789174	0.908331	0.0258983		46.4663	40.3707	13.1631
cpx	Bishop Creek	SNB-18-29	18-29-cpx	52.7449	0.036598	0.482632	7.84312	0.289746	13.4887	24.4253	0.236236	0	0.014126	0	99.5614	75.4034		units	1.97374	0.00102988	0.0212854	0.000417931	0.0458887	0.199557	0.00918361	0.75247	0.979284	0.0171397		49.5288	38.0574	12.4138
cpx	Bishop Creek	SNB-18-29	18-29-cpx	53.1568	0.033766	0.484348	7.92821	0.303565	13.6337	24.5132	0.22383	0	0.002486	0	100.28	75.4016		units	1.9749	0.00094338	0.021208	7.30235e-05	0.0431527	0.203178	0.00955265	0.755106	0.975762	0.0161232		49.3508	38.1907	12.4586
cpx	Bishop Creek	SNB-18-29	18-29-cpx	52.6388	0.041766	0.837754	7.7938	0.290267	13.387	24.0897	0.209129	0.02314	0.004407	0.020561	99.3363	75.38		units	1.97524	0.00117858	0.0370499	0.000130747	0.025193	0.219387	0.00922567	0.748869	0.968509	0.0152151		49.3644	38.1695	12.4661
cpx	Bishop Creek	SNB-18-29	18-29-cpx	53.0254	0.005621	0.351854	7.83168	0.259713	13.45	24.9018	0.21316	0	0.007386	0.034754	100.081	75.3772		units	1.97554	0.000157484	0.0154497	0.000217564	0.0483338	0.195679	0.00819561	0.74702	0.994008	0.0153976		50.0749	37.6325	12.2926
cpx	Bishop Creek	SNB-18-29	18-29-cpx26-r	53.2935	0.024881	0.340038	7.92008	0.273105	13.5934	24.7742	0.210569	0.012535	0.009944	0.012445	100.465	75.3657		units	1.97764	0.000694325	0.0148716	0.00029175	0.0433088	0.202479	0.008584	0.751988	0.984988	0.0151501		49.6775	37.9263	12.3962
cpx	Bishop Creek	SNB-18-29	18-29-cpx	52.9014	0.039031	0.49458	7.922	0.306006	13.5739	24.5859	0.224292	0.010698	0.015887	0	100.074	75.3346		units	1.96984	0.00109294	0.0217048	0.000467716	0.0521467	0.194545	0.00965117	0.753491	0.980864	0.0161929		49.5124	38.035	12.4526
cpx	Bishop Creek	SNB-18-29	18-29-cpx	52.7478	0.089302	1.19267	8.27166	0.269994	14.1702	22.2929	0.308338	0.012483	0.023719	0.018634	99.3977	75.3309		units	1.97201	0.00251066	0.052551	0.000701096	0.0200508	0.238565	0.0085496	0.789752	0.892957	0.0223501		45.9973	40.6811	13.3216
cpx	Bishop Creek	SNB-18-29	18-29-cpx	52.7997	0.037906	0.486168	7.95579	0.268965	13.6215	24.5355	0.219751	0	0.016628	0.00977	99.9517	75.3206		units	1.96801	0.00106249	0.0213569	0.000490018	0.0558841	0.192107	0.00849138	0.756888	0.979828	0.0158809		49.3689	38.136	12.4951
cpx	Bishop Creek	SNB-18-29	18-29-cpx	53.086	0.038676	0.446476	7.93588	0.267938	13.5845	24.6301	0.230477	0	0	0.006065	100.226	75.3165		units	1.9736	0.00108129	0.0195629	0	0.0476832	0.199052	0.00843723	0.752889	0.981079	0.0166132		49.5318	38.0112	12.4569
cpx	Bishop Creek	SNB-18-29	18-29-cpx	53.1444	0.047013	0.544604	7.96571	0.317375	13.6286	24.3038	0.260966	0	0.026648	0	100.239	75.3069		units	1.97498	0.00131384	0.0238529	0.000782968	0.0415849	0.205978	0.00998994	0.755027	0.96769	0.0188033		49.1144	38.3208	12.5648
cpx	Bishop Creek	SNB-18-29	18-29-cpx5	53.1165	0.022856	0.505363	7.80884	0.293042	13.3541	24.7938	0.225116	0.004517	0.016236	0	100.14	75.2985		units	1.97773	0.000639967	0.0221767	0.00047796	0.0368611	0.206292	0.00924171	0.741239	0.989092	0.0162514		50.1191	37.5599	12.321
cpx	Bishop Creek	SNB-18-29	18-29-cpx26-c	52.6008	0.092958	0.726067	8.09215	0.299352	13.8085	23.7425	0.285067	0.007517	0.024717	0	99.6796	75.258		units	1.96376	0.00260978	0.0319469	0.000729572	0.0552105	0.197438	0.00946596	0.768515	0.949686	0.0206343		48.1866	38.9941	12.8193
cpx	Bishop Creek	SNB-18-29	18-29-cpx	53.1157	0.054894	0.440463	7.99425	0.243331	13.6242	24.6137	0.224788	0.000748	0.020924	0.011566	100.345	75.2345		units	1.97269	0.00153314	0.0192797	0.000614407	0.0478462	0.20045	0.00765454	0.754321	0.979424	0.0161866		49.4149	38.0578	12.5273
cpx	Bishop Creek	SNB-18-29	18-29-cpx	51.6615	0.008555	2.1075	7.42577	0.294477	12.6342	24.7673	0.097641	0	0.018777	0	99.0158	75.2032		units	1.94608	0.000242344	0.0935654	0.000559234	0.020372	0.21356	0.0093957	0.709493	0.999605	0.00713134		51.4457	36.5148	12.0396
cpx	Bishop Creek	SNB-18-29	18-29-cpx	52.8638	0.045107	0.529151	8.00944	0.270312	13.5903	24.5064	0.231165	0	0.019531	0	100.065	75.1526		units	1.96833	0.001263	0.0232207	0.000574963	0.0537009	0.1957	0.00852494	0.754359	0.977635	0.0166882		49.3408	38.0721	12.5871
cpx	Bishop Creek	SNB-18-29	18-29-cpx7-r	52.9334	0.016319	0.383238	7.86801	0.28311	13.3481	24.8961	0.21416	0.003397	0.00699	0	99.9529	75.1495		units	1.97493	0.000457863	0.0168518	0.000206193	0.0476616	0.197833	0.00894669	0.742421	0.995201	0.015492		50.1837	37.4371	12.3792
cpx	Bishop Creek	SNB-18-29	18-29-cpx	52.9437	0.100353	1.00317	8.3884	0.236285	14.2005	22.4868	0.280545	0.001739	0.009995	0	99.6515	75.1094		units	1.97494	0.00281508	0.0441034	0.00029478	0.0203746	0.241308	0.00746556	0.789681	0.898723	0.0202904		46.0863	40.4946	13.419
cpx	Bishop Creek	SNB-18-29	18-29-cpx16-c	53.0018	0.062849	0.567937	8.05198	0.302847	13.6043	24.4093	0.259046	0.001816	0.013138	0	100.275	75.0728		units	1.96933	0.00175609	0.0248704	0.000385951	0.0512345	0.198965	0.00953096	0.75355	0.971717	0.0186617		49.1892	38.1454	12.6653
cpx	Bishop Creek	SNB-18-29	18-29-cpx	52.9437	0.041996	0.668339	8.02164	0.265675	13.527	24.391	0.238508	0.014855	0.027357	0.00771	100.148	75.0368		units	1.97038	0.00117534	0.0293149	0.000804971	0.0439712	0.205693	0.00837477	0.750495	0.972577	0.0172102		49.3009	38.0434	12.6557
cpx	Bishop Creek	SNB-18-29	18-29-cpx	52.9564	0.022544	0.384648	7.99147	0.311505	13.4745	24.8941	0.22298	0.000158	0.00864	0	100.267	75.0345		units	1.96915	0.000630394	0.016857	0.000254009	0.059401	0.189109	0.00981095	0.746934	0.991777	0.0160758		49.9077	37.5869	12.5054
cpx	Bishop Creek	SNB-18-29	18-29-cpx18-r	53.2565	0.004214	0.217384	7.906	0.291428	13.3261	25.1132	0.149914	0.003015	0	0	100.268	75.0285		units	1.98279	0.000117983	0.00953864	0	0.035475	0.210684	0.0091901	0.73963	1.00176	0.0108216		50.4017	37.2132	12.3851
cpx	Bishop Creek	SNB-18-29	18-29-cpx	52.8863	0.082273	1.13102	8.29032	0.252506	13.9256	22.841	0.246413	0.028155	0.012389	0	99.6959	74.9636		units	1.97433	0.0023097	0.0497626	0.00036567	0.0144203	0.244404	0.00798427	0.774998	0.913587	0.0178356		46.9129	39.7964	13.2907
cpx	Bishop Creek	SNB-18-29	18-29-cpx	52.9242	0.016343	0.408597	8.00044	0.283443	13.3453	24.8732	0.226458	0	0.007895	0	100.086	74.8324		units	1.97224	0.000457992	0.0179455	0.000232612	0.0527857	0.196545	0.00894658	0.741381	0.993102	0.0163621		50.0603	37.3715	12.5682
cpx	Bishop Creek	SNB-18-29	18-29-cpx	52.8694	0.028125	0.349137	7.9954	0.295987	13.335	24.9879	0.192105	0.007409	0	0.010341	100.071	74.8298		units	1.97157	0.000788718	0.0153448	0	0.0538246	0.195523	0.00934903	0.741328	0.998381	0.0138897		50.1937	37.2703	12.536
cpx	Bishop Creek	SNB-18-29	18-29-cpx	53.1621	0	0.17615	8.05989	0.282137	13.3835	25.0521	0.130006	0.002768	0.006965	6.4e-05	100.256	74.7468		units	1.97998	0	0.00773208	0.000205095	0.0414972	0.209543	0.00890029	0.743081	0.999676	0.0093879		50.1393	37.2696	12.5911
cpx	Bishop Creek	SNB-18-29	18-29-cpx	53.002	0.015382	0.427184	8.01386	0.27617	13.2909	24.8944	0.202701	0	0.023514	0	100.146	74.7238		units	1.97492	0.000431013	0.0187598	0.000692722	0.0444914	0.205229	0.00871604	0.738278	0.993839	0.014644		50.1474	37.2522	12.6005
cpx	Bishop Creek	SNB-18-29	18-29-cpx	53.0435	0.005437	0.369752	8.04432	0.285716	13.2305	24.8617	0.237341	0	0.004749	0.036306	100.119	74.5659		units	1.97781	0.000152451	0.0162487	0.00014	0.044849	0.205991	0.00902343	0.735424	0.993206	0.0171582		50.1754	37.1526	12.6721
cpx	Bishop Creek	SNB-18-29	18-29-cpx	53.5762	0.003431	0.340138	8.2194	0.26291	13.4031	24.7593	0.142181	0.009962	0.00748	0.020192	100.744	74.4029		units	1.98677	9.56791e-05	0.0148657	0.000219307	0.021408	0.233493	0.00825787	0.740949	0.983719	0.0102227		49.6936	37.4298	12.8766
cpx	Bishop Creek	SNB-18-29	18-29-cpx22	53.2525	0.020281	0.380763	8.20787	0.285992	13.3406	24.6339	0.212076	0.000986	0.006112	0.007079	100.348	74.3407		units	1.98113	0.00056739	0.0166948	0.000179775	0.0350361	0.220327	0.0090118	0.739872	0.981888	0.0152971		49.6625	37.4217	12.9159
cpx	Bishop Creek	SNB-18-29	18-29-cpx	52.865	0.029054	0.399058	8.18178	0.361185	13.2909	24.6508	0.218236	0.000258	0.025103	0	100.021	74.3301		units	1.97307	0.000815456	0.0175536	0.000740755	0.0497326	0.205642	0.011418	0.739496	0.985742	0.0157924		49.7695	37.3368	12.8937
cpx	Bishop Creek	SNB-18-29	18-29-cpx18-r	52.6523	0.138874	1.22272	8.82549	0.259514	13.9662	21.8553	0.251926	0.051274	0.01573	0	99.2393	73.8276		units	1.97689	0.00392109	0.0541063	0.000466949	0.00213761	0.274977	0.008253	0.781722	0.879183	0.0183394		45.365	40.3361	14.2989
cpx	Bishop Creek	SNB-18-29	18-29-cpx	52.8694	0.012409	0.3741	8.37483	0.275287	13.1768	24.6842	0.205239	0.003701	0.023979	0.002828	100.003	73.7159		units	1.97525	0.000348638	0.0164725	0.000708309	0.0464962	0.215171	0.0087114	0.733895	0.988084	0.014867		49.8115	36.9973	13.1912
cpx	Bishop Creek	SNB-18-29	18-29-cpx	52.9003	0.024368	0.415123	8.43514	0.334507	13.0775	24.7252	0.241577	0	0	0.022108	100.176	73.4294		units	1.97389	0.000683761	0.0182556	0	0.0500786	0.213137	0.0105719	0.727443	0.988465	0.017477		49.9446	36.7558	13.2996
cpx	Bishop Creek	SNB-18-29	18-29-cpx2-r	53.3273	0.020077	0.502841	8.49452	0.277592	13.0622	24.7653	0.226438	0.00079	0.001981	0.029264	100.708	73.2693		units	1.9802	0.000560633	0.0220062	5.81592e-05	0.0327235	0.231064	0.00873075	0.723075	0.985283	0.0163025		49.9599	36.6644	13.3757
cpx	Bishop Creek	SNB-18-29	18-29-cpx15-c	53.0133	0.030561	0.398455	8.55143	0.263019	13.0758	24.7843	0.197738	0	0.013351	0.024913	100.353	73.1589		units	1.97587	0.000856569	0.0175029	0.000393426	0.0429374	0.223607	0.00830323	0.726528	0.989711	0.0142893		49.9153	36.6418	13.4429
cpx	Bishop Creek	SNB-18-29	18-29-cpx	51.7025	0.172045	2.57796	10.2741	0.226138	14.0792	19.2191	0.413234	0.046325	0.005911	0.017744	98.7343	70.9529		units	1.9503	0.00488037	0.11461	0.000176289	0.00507471	0.319034	0.00722519	0.791726	0.77675	0.0302227		41.0417	41.8331	17.1252
cpx	Bishop Creek	SNB-18-33B	18-33B-cpx1	53.9497	0.171789	1.70386	7.26374	0.253035	14.6686	20.841	0.316625	0.008518	0.102316	0.011857	99.2911	78.2593		units	2.01178	0.00481735	0.0748826	0.00301655	0	0.226521	0.00799205	0.815433	0.832662	0.022892		44.4177	43.4987	12.0836
cpx	Bishop Creek	SNB-18-33B	18-33B-cpx4-r	52.1325	0.326296	2.01675	7.37918	0.335354	14.357	22.4029	0.441675	0.004612	0.076858	0.001325	99.4745	77.6191		units	1.93922	0.0091275	0.0884154	0.00226039	0.04448	0.185073	0.0105659	0.796144	0.892857	0.0318544		46.538	41.4971	11.9649
cpx	Bishop Creek	SNB-18-33B	18-33B-cpx2	53.8706	0.365187	1.93835	7.75853	0.285379	15.0304	19.4995	0.273735	0.002063	0.009915	0	99.0337	77.5444		units	2.01391	0.0102665	0.0854035	0.000293059	0	0.242562	0.0090364	0.837658	0.781032	0.0198411		41.9627	45.0051	13.0322
cpx	Bishop Creek	SNB-18-33B	18-33B-cpx4-r	53.2363	0.067117	0.454563	7.23657	0.43204	13.8857	24.586	0.165557	0.002932	0.005528	0	100.072	77.3773		units	1.9789	0.00187616	0.0199143	0.000162465	0.0302991	0.194661	0.0136027	0.769472	0.979179	0.0119319		49.6136	38.988	11.3984
cpx	Bishop Creek	SNB-18-33B	18-33B-cpx1	53.2302	0.44372	2.73437	7.84738	0.250225	14.6264	20.4156	0.262497	0.013463	0.000171	0	99.8239	76.8645		units	1.97609	0.0123874	0.119636	5.01905e-06	0	0.24363	0.00786804	0.809461	0.812024	0.0188939		43.5375	43.4	13.0625
cpx	Bishop Creek	SNB-18-33B	18-33B-cpx-6-r	52.4893	0.250203	1.39162	7.84734	0.319335	14.6256	22.3694	0.215145	0.002412	0	0.035966	99.5463	76.8636		units	1.95604	0.00701164	0.0611201	0	0.028327	0.216233	0.0100795	0.812508	0.893139	0.0155448		45.7972	41.6627	12.5402
cpx	Bishop Creek	SNB-18-33B	18-33B-cpx4-r	51.5903	0.438803	2.02497	7.9026	0.302738	14.7045	21.731	0.260869	0.008806	0.078643	0	99.0432	76.8345		units	1.92962	0.0123423	0.0892646	0.00232562	0.0434022	0.203787	0.00959084	0.819904	0.870845	0.0189179		44.9367	42.308	12.7553
cpx	Bishop Creek	SNB-18-33B	18-33B-cpx-6-c	52.5198	0.359473	1.25934	8.1014	0.295058	14.9367	21.9228	0.279659	0.001311	0.017011	0	99.6925	76.6707		units	1.95222	0.0100483	0.05517	0.000499932	0.0399496	0.211888	0.00928963	0.82769	0.87309	0.0201549		44.7138	42.3887	12.8975
cpx	Bishop Creek	SNB-18-33B	18-33B-cpx5-c	52.456	0.24763	1.27147	8.10783	0.32002	14.6035	22.1298	0.262205	0.007362	0.011921	0.011097	99.4288	76.2505		units	1.95748	0.00694908	0.0559198	0.000351715	0.0338339	0.219191	0.010115	0.8124	0.884784	0.018971		45.3687	41.6571	12.9743
cpx	Bishop Creek	SNB-18-33B	18-33B-cpx5-c	51.5843	0.508195	2.25973	7.82153	0.407773	13.9428	22.0406	0.431843	0.014672	0.002999	0	99.0145	76.0626		units	1.93279	0.0143192	0.0997883	8.88423e-05	0.0372676	0.207817	0.0129411	0.778804	0.884808	0.0313719		46.3567	40.8029	12.8404
cpx	Bishop Creek	SNB-18-33B	18-33B-cpx5-c	51.4171	0.4734	2.07159	8.03159	0.28614	14.2898	22.1144	0.236238	0	0	0	98.9203	76.0276		units	1.92884	0.0133548	0.09159	0	0.0412099	0.210758	0.00909185	0.799141	0.888835	0.0171824		45.8176	41.194	12.9884
cpx	Bishop Creek	SNB-18-33B	18-33B-cpx2	53.4099	0.395391	2.16462	8.30497	0.294862	14.774	19.2312	0.224371	0	0.027858	0	98.8271	76.0248		units	2.00526	0.0111634	0.0957824	0.00082694	0	0.260761	0.00937677	0.826902	0.773593	0.0163329		41.5629	44.4271	14.01
cpx	Bishop Creek	SNB-18-33B	18-33B-cpx1	53.3141	0.353481	2.08948	8.2139	0.287833	14.5966	20.4749	0.224657	0.002602	0.000366	0	99.5579	76.0057		units	1.98769	0.00991046	0.0918122	1.07886e-05	0	0.256102	0.00908936	0.811272	0.817874	0.0162395		43.3828	43.0327	13.5845
cpx	Bishop Creek	SNB-18-33B	18-33B-cpx4-r	52.7897	0.202711	1.10719	8.1919	0.428984	14.5545	22.0059	0.249034	0.006109	0.006344	0	99.5423	76.0019		units	1.96933	0.00568679	0.0486795	0.000187115	0.0191179	0.236452	0.0135549	0.80942	0.879562	0.0180125		45.2321	41.625	13.1429
cpx	Bishop Creek	SNB-18-33B	18-33B-cpx1	52.598	0.528481	2.98122	7.95818	0.251899	14.0905	20.9098	0.267879	0.003916	0.043552	0	99.6333	75.9388		units	1.96005	0.0148098	0.130933	0.00128316	0	0.248009	0.00795079	0.782767	0.834844	0.0193546		44.7489	41.9575	13.2937
cpx	Bishop Creek	SNB-18-33B	18-33B-cpx-6-c	52.362	0.377158	1.31761	8.48864	0.311356	15.0234	21.5098	0.258601	0	0	0.001066	99.6496	75.9312		units	1.94826	0.010553	0.0577798	0	0.0432401	0.220895	0.00981239	0.833314	0.857485	0.0186556		43.8626	42.6262	13.5112
cpx	Bishop Creek	SNB-18-33B	18-33B-cpx1	53.9045	0.2026	1.48382	8.15927	0.374632	14.4031	20.637	0.296425	0.054516	0.002424	0	99.5182	75.8838		units	2.01314	0.00568995	0.0653107	7.15742e-05	0	0.254833	0.0118506	0.801886	0.825757	0.021464		43.8655	42.5974	13.5371
cpx	Bishop Creek	SNB-18-33B	18-33B-cpx-6-r	51.5782	0.395863	1.71196	8.63533	0.323955	14.915	21.2735	0.204446	0	0	0	99.0383	75.4829		units	1.93152	0.0111481	0.0755586	0	0.0539402	0.216499	0.0102755	0.832658	0.853552	0.0148443		43.6232	42.5553	13.8215
cpx	Bishop Creek	SNB-18-33B	18-33B-cpx4-r	51.4945	0.47294	2.33308	8.44464	0.313446	14.4177	21.408	0.280076	0	0.048527	0	99.2129	75.268		units	1.92612	0.013303	0.102851	0.0014351	0.037174	0.226982	0.00993052	0.803949	0.857941	0.0203117		44.5442	41.7409	13.7149
cpx	Bishop Creek	SNB-18-33B	18-33B-cpx-6-r	52.1845	0.211812	1.83451	8.59041	0.337787	14.663	21.4324	0.254929	0.002189	0.012028	0.000454	99.524	75.2634		units	1.94533	0.00593778	0.0805988	0.000354504	0.0349267	0.23288	0.0106655	0.81486	0.856015	0.0184255		44.1545	42.0316	13.8139
cpx	Bishop Creek	SNB-18-33B	18-33B-cpx5-c	51.605	0.403448	2.17973	8.60104	0.326227	14.3489	21.4367	0.279916	0.003637	0	0.000578	99.1852	74.8348		units	1.93191	0.011358	0.0961732	0	0.0376139	0.231664	0.0103443	0.800795	0.859826	0.0203174		44.5529	41.4941	13.953
cpx	Bishop Creek	SNB-18-33B	18-33B-cpx-6-r	51.5719	0.442351	2.22438	8.83429	0.314285	14.5345	21.2138	0.290238	0.016365	0.025025	0	99.4671	74.5719		units	1.92506	0.0124171	0.0978577	0.000738551	0.0474576	0.22832	0.00993666	0.808795	0.848414	0.0210055		43.8914	41.8417	14.2669
cpx	Bishop Creek	SNB-18-33B	18-33B-cpx4-r	51.4951	0.439651	2.23906	8.44455	0.38401	13.8851	21.5171	0.356347	0.015161	0.021629	0	98.7977	74.5609		units	1.93749	0.0124395	0.0992873	0.000643406	0.0262078	0.239501	0.0122377	0.778811	0.867388	0.0259952		45.3677	40.7348	13.8976
cpx	Bishop Creek	SNB-18-33B	18-33B-cpx-6-c	51.7232	0.448248	1.97196	8.9802	0.315196	14.7354	21.0214	0.248487	0.005687	0.012308	0.016366	99.4784	74.5216		units	1.93101	0.0125845	0.0867667	0.000363297	0.0436766	0.236699	0.00996701	0.820104	0.840847	0.0179866		43.313	42.2445	14.4425
cpx	Bishop Creek	SNB-18-33B	18-33B-cpx4-c	51.823	0.386354	1.44061	10.1132	0.468876	13.895	21.234	0.292494	0.004048	0.005699	0	99.6632	71.0068		units	1.94271	0.0108916	0.0636486	0.000168912	0.0502304	0.266823	0.0148878	0.776521	0.852855	0.0212594		43.8164	39.8946	16.289
cpx	Bishop Creek	SNB-18-43	18-43-cpx10-c	53.1232	0.270945	2.15289	7.57019	0.216076	17.3182	20.4383	0.162389	0.003562	0.12319	0	101.379	80.3066		units	1.92291	0.00737527	0.0918444	0.00352555	0.0554478	0.173712	0.00662473	0.934517	0.792642	0.0113967		40.517	47.7691	11.7138
cpx	Bishop Creek	SNB-18-43	18-43-cpx10-c	53.9789	0.171441	1.61151	6.92845	0.163777	15.548	22.2653	0.288231	0.049403	0.155908	0.015211	101.176	80.0005		units	1.96903	0.00470288	0.0692814	0.00449647	0	0.211359	0.00506019	0.845495	0.87019	0.0203852		45.1567	43.8752	10.968
cpx	Bishop Creek	SNB-18-43	18-43-cpx10-c	53.7694	0.251743	2.00536	7.99146	0.216374	17.7747	18.9018	0.181184	0	0.119273	0	101.211	79.8579		units	1.94845	0.00686014	0.0856452	0.00341721	0.013044	0.229135	0.00664118	0.960211	0.733865	0.0127298		37.9013	49.5911	12.5076
cpx	Bishop Creek	SNB-18-43	18-43-cpx10-r	52.3206	0.494923	2.47143	8.69448	0.240343	15.0058	21.1316	0.187002	0.003004	0.117114	0	100.666	75.4689		units	1.92805	0.0137152	0.107337	0.00341216	0.0190841	0.24886	0.00750175	0.824354	0.834326	0.013361		43.305	42.7875	13.9075
cpx	Bishop Creek	SNB-18-43	18-43-cpx2	51.8758	0.420144	2.34827	9.29744	0.242545	14.7709	21.0665	0.28935	0.008985	0.08448	0	100.404	73.9034		units	1.91851	0.0116847	0.102353	0.00247017	0.0555446	0.232008	0.00759759	0.814357	0.834732	0.0207476		43.102	42.05	14.848
cpx	Bishop Creek	SNB-18-43	18-43-cpx10-r	52.4706	0.558578	2.37654	9.22273	0.237819	14.6508	21.1617	0.24127	0	0.090041	0.003747	101.014	73.9015		units	1.93158	0.0154632	0.103109	0.00262066	0.017413	0.266517	0.00741528	0.804016	0.83465	0.0172205		43.4127	41.8193	14.768
cpx	Bishop Creek	SNB-18-43	18-43-cpx2-c	51.185	0.6016	2.98035	9.21109	0.261029	14.5759	20.857	0.225911	0.000276	0.069463	0.00782	99.9755	73.8269		units	1.90203	0.0168114	0.130526	0.00204082	0.0460237	0.240224	0.00821579	0.807456	0.830395	0.0162764		43.1576	41.9654	14.877
cpx	Bishop Creek	SNB-18-43	18-43-cpx13-c	51.604	0.514351	2.65886	9.00946	0.232823	14.2512	21.6529	0.214213	0	0.061335	0.011732	100.211	73.8192		units	1.91544	0.014357	0.116315	0.00179998	0.0377081	0.241958	0.00731975	0.788576	0.861111	0.0154162		44.6321	40.8726	14.4953
cpx	Bishop Creek	SNB-18-43	18-43-cpx10-r	52.991	0.461908	2.26952	10.1236	0.299621	15.5905	19.0491	0.19064	0.000817	0.05226	0	101.029	73.2985		units	1.94828	0.012771	0.0983419	0.00151913	0	0.311273	0.00933056	0.854513	0.750382	0.0135897		39.1606	44.5949	16.2445
cpx	Bishop Creek	SNB-18-43	18-43-cpx2-c	50.9277	0.574477	3.15105	9.76597	0.256793	14.8944	20.1757	0.24247	0	0.072869	0.008371	100.07	73.1081		units	1.8896	0.0160291	0.137793	0.00213763	0.0662578	0.236773	0.0080702	0.823849	0.802049	0.017443		41.58	42.7102	15.7098
cpx	Bishop Creek	SNB-18-43	18-43-cpx12-c	50.9543	0.63872	2.87851	9.36952	0.232842	14.2351	21.0013	0.228079	0.008326	0.07504	0	99.6218	73.0327		units	1.90334	0.0179419	0.126724	0.00221618	0.0450069	0.247684	0.00736687	0.792695	0.840503	0.0165184		43.6423	41.16	15.1977
cpx	Bishop Creek	SNB-18-43	18-43-cpx10b	52.0278	0.673482	2.76579	9.60079	0.266489	14.2332	21.3159	0.257181	0.010164	0.049975	0.009869	101.211	72.547		units	1.91555	0.0186468	0.120014	0.00145474	0.0285061	0.267104	0.0083104	0.781209	0.840851	0.0183587		43.8475	40.7374	15.4151
cpx	Bishop Creek	SNB-18-43	18-43-cpx13-c	51.6019	0.474202	2.79319	10.3275	0.251917	15.2777	19.5843	0.181481	0.006333	0.05984	0.02257	100.581	72.5041		units	1.90663	0.013176	0.121634	0.0017481	0.0500154	0.269103	0.00788393	0.841521	0.775291	0.013001		40.0475	43.4685	16.484
cpx	Bishop Creek	SNB-18-43	18-43-cpx2-c	51.3092	0.539888	2.68928	10.3609	0.246782	15.1915	19.6111	0.200909	0.001763	0.055835	0.006948	100.214	72.3268		units	1.90297	0.0150578	0.117552	0.00163727	0.0591992	0.26216	0.0077524	0.839938	0.779285	0.0144472		40.1573	43.2828	16.5599
cpx	Bishop Creek	SNB-18-43	18-43-cpx2	51.4992	0.536932	2.67097	10.6104	0.263111	15.4566	18.8912	0.269862	0.004813	0.070297	0.014838	100.288	72.1965		units	1.90723	0.0149535	0.116581	0.00205833	0.0563752	0.272243	0.00825329	0.853348	0.749583	0.0193772		38.8073	44.1795	17.0132
cpx	Bishop Creek	SNB-18-43	18-43-cpx14-r	52.1992	0.57878	2.34645	9.81709	0.293711	14.1211	21.0882	0.23134	0	0.078821	0	100.755	71.9417		units	1.93304	0.016118	0.10241	0.00230778	0.0135763	0.290453	0.00921261	0.779565	0.836707	0.0166102		43.5716	40.596	15.8324
cpx	Bishop Creek	SNB-18-43	18-43-cpx2b-r	51.9328	0.430515	1.96821	11.2097	0.288107	15.9185	18.411	0.162475	0.001143	0.061188	0	100.384	71.6818		units	1.92318	0.0119891	0.0859021	0.00179151	0.0536425	0.293515	0.00903685	0.878795	0.730486	0.0116657		37.3375	44.9181	17.7444
cpx	Bishop Creek	SNB-18-43	18-43-cpx12-c	51.2901	0.615104	2.45751	10.1825	0.286582	14.2258	20.5941	0.237108	0.007645	0.056596	0	99.9529	71.3495		units	1.9141	0.0172624	0.108089	0.00166991	0.0446723	0.273117	0.0090587	0.791435	0.823438	0.0171563		42.6064	40.9505	16.4431
cpx	Bishop Creek	SNB-18-43	18-43-cpx14-c	51.8568	0.542643	2.63065	10.2351	0.265415	14.2158	21.0754	0.222116	0.000889	0.072615	0	101.117	71.2297		units	1.91335	0.0150565	0.114395	0.00211831	0.0425683	0.273249	0.00829467	0.781933	0.833149	0.0158897		43.1482	40.4958	16.356
cpx	Bishop Creek	SNB-18-43	18-43-cpx10b	52.926	0.389014	2.19117	11.1221	0.291995	15.2993	18.3451	0.145773	0.032217	0.036464	0	100.779	71.0312		units	1.95797	0.0108224	0.0955367	0.00106654	0	0.344098	0.00914954	0.843759	0.727138	0.0104559		37.9707	44.0606	17.9686
cpx	Bishop Creek	SNB-18-43	18-43-cpx1/3-r	51.7976	0.52642	2.72191	10.9226	0.28094	15.0178	19.8571	0.189163	0.007771	0.100671	0	101.422	71.0215		units	1.90287	0.0145429	0.11785	0.00292401	0.057881	0.277688	0.00874174	0.822457	0.781576	0.0134735		40.2957	42.4034	17.3009
cpx	Bishop Creek	SNB-18-43	18-43-cpx10-r	52.6931	0.53435	2.01775	10.7975	0.276278	14.7994	19.7153	0.250723	0	0.091257	0.016037	101.192	70.957		units	1.94295	0.0148168	0.0876858	0.00266041	0.0120498	0.320907	0.00862858	0.813502	0.778878	0.0179245		40.4541	42.2525	17.2934
cpx	Bishop Creek	SNB-18-43	18-43-cpx13-r	51.7908	0.509565	2.08316	10.941	0.291911	14.6009	20.4417	0.21551	7.5e-05	0.055717	0	100.93	70.4037		units	1.91541	0.0141719	0.0908001	0.00162919	0.0638647	0.274528	0.00914417	0.805004	0.809997	0.0154533		41.4661	41.2105	17.3234
cpx	Bishop Creek	SNB-18-43	18-43-cpx1/3-r	51.16	0.69694	2.47278	10.74	0.269967	14.1059	19.9672	0.346215	0.01001	0.068906	0.010239	99.8481	70.0703		units	1.9133	0.0196006	0.108992	0.00203745	0.0482664	0.287637	0.00855165	0.786434	0.800073	0.0251042		41.6182	40.9088	17.473
cpx	Bishop Creek	SNB-18-43	18-43-cpx12-r	51.8977	0.504203	2.11504	11.309	0.310706	14.7824	19.3602	0.165878	0	0.057716	0.030283	100.533	69.97		units	1.92861	0.0140904	0.0926343	0.00169578	0.0322116	0.319248	0.00977986	0.818934	0.770839	0.0119518		39.7087	42.1863	18.105
cpx	Bishop Creek	SNB-18-43	18-43-cpx12-r	51.206	0.661242	2.68338	11.3859	0.290692	14.7491	19.1673	0.224349	0.008548	0.07335	0.001546	100.451	69.7798		units	1.90268	0.0184768	0.117512	0.00215487	0.0541847	0.299623	0.00914879	0.816992	0.763067	0.0161628		39.4581	42.2465	18.2953
cpx	Bishop Creek	SNB-18-43	18-43-cpx2-r	51.2052	0.51974	1.76952	10.5541	0.313419	13.6695	21.258	0.244621	0.00767	0.052615	0	99.5945	69.7766		units	1.92422	0.0146875	0.0783704	0.00156324	0.0600675	0.271613	0.0099759	0.765778	0.855898	0.017823		43.8168	39.2032	16.98
cpx	Bishop Creek	SNB-18-43	18-43-cpx12-c	51.4859	0.528658	2.64676	11.6095	0.26511	14.9877	18.9554	0.196887	0.005672	0.077672	0.016999	100.776	69.7082		units	1.90633	0.0147199	0.115499	0.00227378	0.0542647	0.305217	0.00831421	0.82728	0.751968	0.0141343		38.7866	42.6712	18.5421
cpx	Bishop Creek	SNB-18-43	18-43-cpx1/3-r	51.0138	0.749282	2.75279	10.9046	0.295146	13.9299	19.7982	0.361436	0.007238	0.092055	0	99.9045	69.4849		units	1.90808	0.0210753	0.121349	0.00272227	0.0438364	0.297256	0.00935041	0.776722	0.7934	0.0262112		41.5129	40.6402	17.8469
cpx	Bishop Creek	SNB-18-43	18-43-cpx14-c	51.9915	0.553479	2.21512	11.3648	0.271353	14.357	20.0713	0.220903	0.009937	0.052201	0	101.108	69.2483		units	1.9233	0.015397	0.0965756	0.00152675	0.0403418	0.311244	0.00850228	0.791751	0.795514	0.015844		41.0302	40.8361	18.1337
cpx	Bishop Creek	SNB-18-43	18-43-cpx12-r	51.8395	0.479445	2.06692	11.8629	0.302691	14.8267	19.0473	0.195879	0	0.085143	0.002605	100.709	69.0197		units	1.92406	0.0133819	0.0904145	0.00249852	0.0462971	0.321922	0.00951575	0.820372	0.757441	0.0140959		38.9223	42.1561	18.9215
cpx	Bishop Creek	SNB-18-43	18-43-cpx1/3-r	50.6082	0.587126	2.93943	11.2294	0.294536	14.0013	19.941	0.219334	0	0.098295	0	99.9186	68.9685		units	1.89375	0.0165217	0.129635	0.0029081	0.0628223	0.288587	0.00933525	0.781049	0.799477	0.0159131		41.3822	40.4283	18.1895
cpx	Bishop Creek	SNB-18-43	18-43-cpx1/3-r	51.1835	0.700908	1.97394	12.2023	0.299317	14.0679	19.6255	0.244237	0.00339	0.08505	0	100.386	67.2673		units	1.91278	0.0196977	0.086941	0.00251295	0.0632887	0.318068	0.0094744	0.783739	0.785803	0.0176967		40.279	40.1732	19.5477
cpx	Bishop Creek	SNB-18-43	18-43-cpx12	50.6116	0.487816	2.33682	12.4637	0.324913	13.3827	19.6921	0.258718	0.010264	0.25482	0.028529	99.852	65.6824		units	1.90658	0.0138192	0.103749	0.00758952	0.0667566	0.325896	0.0103671	0.751549	0.794795	0.0188964		40.99	38.7597	20.2503
cpx	Bishop Creek	SNB-18-43	18-43-cpx12	50.5726	0.606179	2.23674	11.8968	0.321578	12.7531	21.2243	0.303583	0.00272	0.091973	0.026599	100.036	65.6456		units	1.90303	0.0171534	0.0991976	0.00273631	0.0798568	0.294525	0.0102495	0.715409	0.855697	0.022149		43.9837	36.7727	19.2436
opx	Bishop Creek	SNB-18-43	18-43-opx7-c	53.5292	0.247322	1.81269	16.2752	0.374319	26.1404	1.62656	0.014396	0.00352	0.034537	0.002304	100.061	74.1134		units	1.93689	0.00672974	0.0773026	0.000988041	0.0354717	0.457018	0.0114721	1.41005	0.0630585	0.00100996		3.2081	71.7365	25.0554
cpx	Bishop Creek	SNB-18-B12	18-B12-cpx19-c	52.0608	0.349569	3.68755	5.50142	0.12738	15.8757	22.3069	0.224514	0.001584	0.375463	0.024408	100.535	83.7237		units	1.89869	0.00958731	0.158503	0.0108264	0.0299933	0.1378	0.00393487	0.863144	0.871646	0.0158757		45.8138	45.3669	8.81922
cpx	Bishop Creek	SNB-18-B12	18-B12-cpx19-c	52.0568	0.335568	3.70427	5.55379	0.113381	15.8742	22.5042	0.240498	0.002781	0.344695	0.001705	100.732	83.5929		units	1.89418	0.00918214	0.158855	0.00991638	0.0414795	0.127521	0.00349437	0.861078	0.877331	0.0169668		45.9959	45.1438	8.86022
cpx	Bishop Creek	SNB-18-B12	18-B12-cpx19-2	51.9316	0.394364	3.8729	5.59856	0.128883	15.7252	22.2524	0.255206	0	0.445006	0.014332	100.618	83.352		units	1.89333	0.0108122	0.166413	0.0128274	0.0305068	0.140191	0.00397995	0.854673	0.869223	0.0180399		45.8791	45.1111	9.00974
cpx	Bishop Creek	SNB-18-B12	18-B12-cpx19-2	52.2415	0.325228	3.63299	5.75675	0.145935	15.9884	22.0943	0.247227	0	0.386907	0.035843	100.855	83.1951		units	1.89973	0.00889373	0.155702	0.0111239	0.0333665	0.141702	0.0044949	0.866737	0.860823	0.0174308		45.2439	45.5547	9.20142
cpx	Bishop Creek	SNB-18-B12	18-B12-cpx19-2	51.9626	0.343658	3.87943	5.64999	0.123798	15.5996	22.2204	0.262819	0	0.709725	0.007481	100.759	83.1125		units	1.89374	0.00941841	0.16663	0.0204501	0.0251678	0.147033	0.00382146	0.847525	0.86764	0.0185709		45.971	44.9052	9.12384
cpx	Bishop Creek	SNB-18-B12	18-B12-cpx19-2	52.4746	0.337031	3.56169	5.87792	0.162475	16.0522	22.1644	0.280847	0	0.357338	0.021285	101.29	82.9583		units	1.89982	0.00917601	0.151976	0.0102286	0.0395164	0.138452	0.00498236	0.866376	0.859758	0.0197142		45.1529	45.5005	9.34658
cpx	Bishop Creek	SNB-18-B12	18-B12-cpx19-zone	52.0303	0.357723	3.93339	5.87211	0.142244	15.798	22.2383	0.284566	0	0.390289	0	101.047	82.7455		units	1.8885	0.00976404	0.168262	0.0112001	0.0440262	0.134217	0.00437302	0.854816	0.864812	0.0200259		45.5675	45.0408	9.39173
cpx	Bishop Creek	SNB-18-B12	18-B12-cpx19-2	52.4421	0.322385	3.62001	6.19662	0.156766	16.3561	21.1902	0.237046	0	0.362488	0	100.884	82.4715		units	1.90528	0.00880792	0.155004	0.0104123	0.0231153	0.165158	0.00482409	0.885862	0.824843	0.0166977		43.4361	46.6494	9.91445
cpx	Bishop Creek	SNB-18-B12	18-B12-cpx19-3	51.7109	0.350622	4.31536	5.83634	0.162062	15.4017	22.1151	0.229446	0.002548	0.638236	0.020109	100.782	82.4683		units	1.88583	0.00961571	0.185479	0.0184025	0.0214427	0.156556	0.00500597	0.837331	0.864109	0.0162237		45.977	44.5522	9.47086
cpx	Bishop Creek	SNB-18-B12	18-B12-cpx19-zone	51.7891	0.348572	4.24173	5.89535	0.148106	15.503	22.2998	0.269659	0	0.536336	0	101.032	82.4176		units	1.88227	0.00952703	0.181695	0.0154119	0.0382985	0.14089	0.00455935	0.839979	0.868366	0.0190023		46.0053	44.5014	9.49326
cpx	Bishop Creek	SNB-18-B12	18-B12-cpx22-c-dark	56.4772	0.10664	1.28489	7.51539	0.327579	19.6214	12.8266	0.232516	0.111771	0	0	98.5039	82.3129		units	2.09023	0.00296799	0.0560459	0	0	0.23261	0.0102689	1.08258	0.508618	0.0166848		27.8877	59.3582	12.7541
cpx	Bishop Creek	SNB-18-B12	18-B12-cpx19-3	51.6737	0.370506	4.25492	6.11454	0.132448	15.9129	21.6269	0.258658	0	0.573092	0.039491	100.957	82.2663		units	1.87834	0.0101279	0.182285	0.0164704	0.0425335	0.143343	0.0040779	0.862311	0.842279	0.0182296		44.554	45.6137	9.83232
cpx	Bishop Creek	SNB-18-B12	18-B12-cpx19-3	51.3995	0.376689	4.52046	6.00732	0.15465	15.5209	21.8461	0.268534	0	0.620624	0	100.715	82.1602		units	1.87383	0.010327	0.194227	0.0178885	0.0385523	0.144598	0.00477536	0.843521	0.8533	0.0189809		45.389	44.8688	9.74219
cpx	Bishop Creek	SNB-18-B12	18-B12-cpx19-c	51.9601	0.337931	3.30988	6.35678	0.150422	15.8456	21.7213	0.29102	0	0.394116	0.002017	100.369	81.6288		units	1.90105	0.00929766	0.142723	0.0114005	0.0458178	0.148681	0.00466146	0.864253	0.851467	0.020644		44.5743	45.2437	10.182
cpx	Bishop Creek	SNB-18-B12	18-B12-cpx19-zone	51.6373	0.354166	4.36244	6.38885	0.162004	15.2743	21.8615	0.27331	0	0.648335	0	100.962	80.9944		units	1.88181	0.009706	0.187369	0.0186805	0.0302263	0.164485	0.00500062	0.829817	0.853593	0.0193115		45.4493	44.1833	10.3673
cpx	Bishop Creek	SNB-18-B12	18-B12-cpx19-4	51.2575	0.418302	4.28678	7.00195	0.175664	15.0423	21.6877	0.267452	0.009105	0.506283	0	100.653	79.2935		units	1.87742	0.0115216	0.185051	0.0146613	0.0414055	0.17307	0.00544969	0.821345	0.851087	0.0189931		45.1049	43.5286	11.3665
cpx	Bishop Creek	SNB-18-B12	18-B12-cpx19-4	51.5376	0.405512	4.29842	7.0286	0.193264	15.0673	21.6735	0.312366	0	0.522484	0	101.039	79.2584		units	1.88004	0.0111242	0.184803	0.0150693	0.03989	0.174532	0.00597146	0.819385	0.847091	0.022093		45.0365	43.5635	11.4
cpx	Bishop Creek	SNB-18-B12	18-B12-cpx19-5	52.4401	0.395825	2.80952	7.24962	0.201713	15.5319	21.6734	0.289719	0	0.187985	0	100.78	79.2486		units	1.91792	0.0108866	0.121103	0.00543583	0.0363874	0.18535	0.00624866	0.846838	0.849284	0.0205443		44.2829	44.1554	11.5617
cpx	Bishop Creek	SNB-18-B12	18-B12-cpx19-4	51.4014	0.432105	4.10128	6.9959	0.176972	14.9824	21.8708	0.278501	0.002251	0.458743	0	100.7	79.2421		units	1.8823	0.0118994	0.177007	0.0132819	0.0410845	0.173162	0.00548914	0.817905	0.858097	0.0197737		45.396	43.2697	11.3343
cpx	Bishop Creek	SNB-18-B12	18-B12-cpx19-5	52.154	0.420924	2.9991	7.20218	0.198053	15.3003	21.912	0.278982	0	0.314964	0.0019	100.782	79.1092		units	1.90915	0.0115871	0.129389	0.00911566	0.0398309	0.18065	0.00614071	0.834949	0.859392	0.0198004		44.881	43.6045	11.5145
cpx	Bishop Creek	SNB-18-B12	18-B12-cpx19-zone-c	51.9141	0.52972	3.19839	7.42781	0.199689	15.0606	21.8643	0.324212	0.002606	0.266665	0.001111	100.789	78.3279		units	1.90196	0.0145943	0.138103	0.00772429	0.0440842	0.183496	0.00619665	0.822561	0.858246	0.02303		44.9723	43.1024	11.9253
cpx	Bishop Creek	SNB-18-B12	18-B12-cpx19-zone-c	51.605	0.523923	3.62129	7.46193	0.181012	14.846	21.7805	0.330913	0.004202	0.363599	0.001684	100.72	78.0048		units	1.89276	0.0144508	0.15654	0.0105439	0.0420172	0.186865	0.00562339	0.811749	0.855913	0.0235324		45.1301	42.8015	12.0684
cpx	Bishop Creek	SNB-18-B12	18-B12-cpx21-c	53.8185	0.033278	0.388434	7.09793	0.20194	13.7132	25.5044	0.063453	0	0.035177	0	100.856	77.4969		units	1.98724	0.000924054	0.0169041	0.00102696	0.01028	0.208903	0.00631579	0.754859	1.009	0.00454275		50.8815	38.0656	11.0529
cpx	Bishop Creek	SNB-18-B12	18-B12-cpx19-zone	51.9091	0.481743	3.81494	8.71136	0.238182	16.8106	17.8653	0.361706	0.539865	0.293254	0.014513	101.04	77.4764		units	1.89814	0.0132471	0.16441	0.00847822	0.0299786	0.236417	0.007377	0.91638	0.699926	0.0256441		37.1767	48.6737	14.1497
cpx	Bishop Creek	SNB-18-B12	18-B12-cpx8-c	53.5628	0	0.247393	7.15551	0.213806	13.8036	25.2565	0.153667	0.00725	0.025901	0	100.426	77.4705		units	1.98425	0	0.0108013	0.000758621	0.0309792	0.190702	0.0067087	0.762312	1.00245	0.0110372		50.4646	38.3757	11.1597
cpx	Bishop Creek	SNB-18-B12	18-B12-cpx19-zone-r	52.1683	0.578601	2.52834	7.43691	0.214641	14.1167	23.6831	0.311262	0.000745	0.022267	0.006394	101.067	77.1876		units	1.914	0.0159638	0.109327	0.00064591	0.0522385	0.175945	0.00667012	0.772107	0.93096	0.0221416		48.205	39.9797	11.8153
cpx	Bishop Creek	SNB-18-B12	18-B12-cpx19-zone-c	52.5653	0.433891	2.12429	7.76982	0.2169	14.741	22.3745	0.348954	0.004577	0.116265	0	100.695	77.1785		units	1.93267	0.0119967	0.0920513	0.00337974	0.0401077	0.198798	0.00675468	0.807972	0.881393	0.0248756		45.709	41.9014	12.3896
cpx	Bishop Creek	SNB-18-B12	18-B12-cpx19-zone	51.7088	0.582809	3.49051	7.99555	0.213156	15.0579	21.5233	0.262738	0.000514	0.151809	0.01935	101.006	77.0484		units	1.89296	0.0160444	0.150599	0.0043939	0.0456486	0.199135	0.00660938	0.821767	0.844195	0.0186486		44.1815	43.0077	12.8109
cpx	Bishop Creek	SNB-18-B12	18-B12-cpx19-zone-r	52.2046	0.52839	2.57864	7.39617	0.209271	13.9286	23.8933	0.324979	0	0.042285	0.024347	101.131	77.0478		units	1.91522	0.0145776	0.111495	0.00122651	0.0508	0.17612	0.00650286	0.761774	0.939169	0.023116		48.7156	39.5139	11.7705
cpx	Bishop Creek	SNB-18-B12	18-B12-cpx8-r	53.5548	0.004275	0.317588	7.33441	0.244953	13.6766	24.9127	0.135697	0.009755	0.021125	0.014369	100.226	76.8727		units	1.99026	0.000119473	0.0139101	0.000620703	0.0144805	0.213466	0.00771046	0.757701	0.991951	0.00977753		50.1594	38.3142	11.5264
cpx	Bishop Creek	SNB-18-B12	18-B12-cpx18	53.3871	0.344532	1.80602	8.03329	0.272755	14.8733	22.0521	0.353748	0.009697	0.021832	0	101.154	76.7456		units	1.9551	0.00948817	0.0779491	0.000632122	0.0173663	0.22866	0.00846039	0.811984	0.865246	0.0251173		44.9886	42.2192	12.7922
cpx	Bishop Creek	SNB-18-B12	18-B12-cpx19-7	52.2088	0.529983	2.44883	7.65941	0.266047	14.1403	23.0969	0.404331	0.002795	0.034106	0.012859	100.804	76.6942		units	1.92012	0.0146578	0.106145	0.000991726	0.0521319	0.183447	0.00828761	0.775267	0.910116	0.0288316		47.3781	40.3583	12.2636
cpx	Bishop Creek	SNB-18-B12	18-B12-cpx19-9	51.7743	0.466101	2.29263	7.53182	0.198313	13.7429	24.1335	0.315201	0	0.051782	0	100.507	76.4843		units	1.91243	0.0129471	0.0998072	0.00151226	0.0704977	0.162165	0.00620452	0.75676	0.9551	0.0225739		49.1174	38.9175	11.965
cpx	Bishop Creek	SNB-18-B12	18-B12-cpx19-6	51.7791	0.556817	2.70451	8.21589	0.225864	14.9577	21.4139	0.284782	0	0.037945	0.014392	100.191	76.4442		units	1.91294	0.0154697	0.117758	0.00110835	0.0447097	0.209129	0.00706774	0.823798	0.847618	0.0203989		44.0263	42.789	13.1847
cpx	Bishop Creek	SNB-18-B12	18-B12-cpx8-c	52.3092	0.02225	1.02331	7.39421	0.225323	13.3722	24.4551	0.208576	0.025908	0.048255	0	99.0843	76.3237		units	1.96493	0.000628522	0.0453037	0.00143314	0.0373272	0.194956	0.00716904	0.748826	0.984231	0.0151908		50.0794	38.1016	11.819
cpx	Bishop Creek	SNB-18-B12	18-B12-cpx19-7	52.24	0.55453	2.43063	8.18036	0.272159	14.7011	21.9681	0.35795	0.000215	0.018865	0	100.724	76.2098		units	1.92138	0.0153376	0.105362	0.000548584	0.0461744	0.205442	0.0084785	0.806062	0.865686	0.0255258		45.0089	41.909	13.0821
cpx	Bishop Creek	SNB-18-B12	18-B12-cpx19-zone	52.627	0.530632	2.46131	8.30624	0.272156	14.9233	21.6527	0.379773	0.001602	0.005999	0	101.161	76.2049		units	1.92612	0.0146046	0.106169	0.000173592	0.0391539	0.215082	0.00843683	0.814235	0.849075	0.0269492		44.2793	42.4623	13.2584
cpx	Bishop Creek	SNB-18-B12	18-B12-cpx19-6	52.2338	0.560543	2.49387	8.41656	0.238392	15.104	21.3767	0.310611	0.000902	0	0.022875	100.758	76.1839		units	1.91935	0.0154893	0.108002	0	0.0444412	0.214198	0.0074196	0.827377	0.84159	0.0221293		43.6599	42.9225	13.4176
cpx	Bishop Creek	SNB-18-B12	18-B12-cpx19-8	52.7281	0.487832	3.53892	7.19648	0.231993	12.9121	21.9256	0.440154	1.03768	0.019424	0.013177	100.532	76.1806		units	1.96949	0.0137026	0.15579	0.000573622	0	0.224796	0.0073396	0.718983	0.877447	0.031876		48.1789	39.478	12.3431
cpx	Bishop Creek	SNB-18-B12	18-B12-cpx9-c	52.69	0.087674	1.02471	7.52811	0.17334	13.4447	25.2671	0.120641	0	0.04146	0.008442	100.386	76.0964		units	1.95533	0.00244672	0.0448177	0.00121646	0.0470872	0.186546	0.0054485	0.743795	1.00463	0.00868029		50.6862	37.5264	11.7874
[truncated: 1,801 more rows]
